# Supplementary material
Source: publisher figshare collection journal article supplement (https://acs.figshare.com/ndownloader/files/14076125)
Supplement: Supplementary file 1 [file 14076125]

## Sheet: SQ_P235_RK_OMPN_4rep_iBAQ_Top3_
proteinName	ac	geneName	proteinDescription	idScore	idQValue	nbPeptides	allAccessions	001_OM-PN_C18	002_OM-PN_C18	003_OM-PN_C18	004_OM-PN_C18	medianInt_GFP-PD	cv_GFP-PD	GFP-PD	FTestPValue	FTestQValue	top3_001_OM-PN_C18	top3_002_OM-PN_C18	top3_003_OM-PN_C18	top3_004_OM-PN_C18				Ratio
sp|P52591|PO121_RAT	P52591	Pom121	Nuclear envelope pore membrane protein POM 121 OS=Rattus norvegicus GN=Pom121 PE=1 SV=1	11892.2	0	102	sp|P52591|PO121_RAT	2.98572e+09	4.41191e+09	2.44645e+09	2.87166e+09	2.92869e+09	0.268679	0.0655431	NA	NA	2.39005e+08	2.56726e+08	3.03803e+08	4.63101e+08			Pom121/NDC1-eGFP	1.05486	0.928512	1.23143	1.52127
sp|Q9BTX1|NDC1_HUMAN	Q9BTX1	NDC1	Nucleoporin NDC1 OS=Homo sapiens GN=NDC1 PE=1 SV=2	13144.7	0	100	sp|Q9BTX1|NDC1_HUMAN	1.80559e+09	2.20529e+09	1.59127e+09	1.94875e+09	1.87717e+09	0.136506	0.0694444	NA	NA	2.26575e+08	2.76492e+08	2.46709e+08	3.04417e+08			NDC1-eGFP/Pom121	0.947991	1.07699	0.812067	0.657345
tr|A0A1D5ZBK8|A0A1D5ZBK8_WHEAT	A0A1D5ZBK8	NA	Elongation factor 1-alpha OS=Triticum aestivum PE=3 SV=1	6041.29	0	43	tr|A0A1D5ZBK8|A0A1D5ZBK8_WHEAT	3.66744e+08	3.49582e+08	2.93531e+08	4.15848e+08	3.58163e+08	0.141585	0.0735294	NA	NA	6.79254e+07	5.13141e+07	4.14514e+07	7.99905e+07
tr|A0A1D6AQH6|A0A1D6AQH6_WHEAT	A0A1D6AQH6	NA	Uncharacterized protein OS=Triticum aestivum PE=3 SV=1	2180.92	0	17	tr|A0A1D6AQH6|A0A1D6AQH6_WHEAT	1.53256e+08	1.09952e+08	4.38702e+07	3.13964e+07	7.69111e+07	0.677018	0.14	NA	NA	3.31024e+07	2.64814e+07	9.18382e+06	5.53965e+06
tr|Q5EWZ1|Q5EWZ1_WHEAT	Q5EWZ1	ACT-1	Actin OS=Triticum aestivum GN=ACT-1 PE=3 SV=1	5404.18	0	37	tr|Q5EWZ1|Q5EWZ1_WHEAT	1.6904e+08	1.82678e+08	1.38827e+08	1.98421e+08	1.75859e+08	0.146917	0.102679	NA	NA	2.4682e+07	2.23886e+07	2.76404e+07	4.51876e+07
tr|A0A1D6BRN0|A0A1D6BRN0_WHEAT	A0A1D6BRN0	NA	Glyceraldehyde-3-phosphate dehydrogenase OS=Triticum aestivum PE=3 SV=1	4926.76	0	35	tr|A0A1D6BRN0|A0A1D6BRN0_WHEAT	1.72063e+08	1.54851e+08	1.00926e+08	1.34005e+08	1.44428e+08	0.217908	0.0574713	NA	NA	1.88992e+07	1.63407e+07	8.96737e+06	1.58683e+07
tr|A0A1D5SQY8|A0A1D5SQY8_WHEAT	A0A1D5SQY8	NA	Tubulin alpha chain OS=Triticum aestivum PE=3 SV=1	4211.75	0	34	tr|A0A1D5SQY8|A0A1D5SQY8_WHEAT	1.31648e+08	1.32297e+08	1.07164e+08	1.51814e+08	1.31973e+08	0.139879	0.0574324	NA	NA	1.75036e+07	2.21917e+07	1.1056e+07	2.58122e+07
tr|A0A1D5XQU6|A0A1D5XQU6_WHEAT	A0A1D5XQU6	NA	Oleosin OS=Triticum aestivum PE=3 SV=1	1499.57	0	7	tr|A0A1D5XQU6|A0A1D5XQU6_WHEAT	6.95533e+07	3.12993e+07	4.49938e+07	6.07262e+07	5.286e+07	0.32811	0.101852	NA	NA	1.72437e+07	8.03968e+06	1.31592e+07	1.99982e+07
tr|A0A1D6BQY9|A0A1D6BQY9_WHEAT	A0A1D6BQY9	NA	Tubulin beta chain OS=Triticum aestivum PE=3 SV=1	2690.35	0	16	tr|A0A1D6BQY9|A0A1D6BQY9_WHEAT	9.51102e+07	9.85612e+07	3.50019e+07	3.53545e+07	6.52323e+07	0.539733	0.0480769	NA	NA	1.40392e+07	1.39088e+07	4.66035e+06	5.97026e+06
sp|Q9ZRA8|TBB5_WHEAT	Q9ZRA8	TUBB5	Tubulin beta-5 chain OS=Triticum aestivum GN=TUBB5 PE=2 SV=1	6042.55	0	37	sp|Q9ZRA8|TBB5_WHEAT	1.37014e+08	1.41111e+08	8.55121e+07	1.00017e+08	1.18516e+08	0.236635	0.0675676	NA	NA	1.26539e+07	1.36902e+07	1.01491e+07	1.06474e+07
tr|A0A1D6CJL6|A0A1D6CJL6_WHEAT	A0A1D6CJL6	NA	Uncharacterized protein OS=Triticum aestivum PE=3 SV=1	2807.49	0	21	tr|A0A1D6CJL6|A0A1D6CJL6_WHEAT	7.57296e+07	9.49016e+07	1.14984e+08	8.62411e+07	9.05714e+07	0.179013	0.0746269	NA	NA	1.20741e+07	1.30048e+07	2.33528e+07	1.91771e+07
tr|A0A1D5ZZ07|A0A1D5ZZ07_WHEAT	A0A1D5ZZ07	NA	Oleosin OS=Triticum aestivum PE=3 SV=1	809.06	0	5	tr|A0A1D5ZZ07|A0A1D5ZZ07_WHEAT	3.65703e+07	3.18179e+07	3.34966e+07	4.57817e+07	3.50334e+07	0.168733	0.0441176	NA	NA	1.08616e+07	9.73576e+06	1.05443e+07	1.50636e+07
tr|W5GHC3|W5GHC3_WHEAT	W5GHC3	NA	Uncharacterized protein OS=Triticum aestivum PE=4 SV=1	3319.48	0	32	tr|W5GHC3|W5GHC3_WHEAT	7.33231e+07	7.46542e+07	5.81942e+07	6.39926e+07	6.86578e+07	0.115948	0.0585938	NA	NA	9.66932e+06	9.68548e+06	1.07803e+07	1.12625e+07
tr|A0A1D5TH00|A0A1D5TH00_WHEAT	A0A1D5TH00	NA	Uncharacterized protein OS=Triticum aestivum PE=4 SV=1	2049.9	0	22	tr|A0A1D5TH00|A0A1D5TH00_WHEAT	5.70829e+07	5.94204e+07	3.05418e+07	3.44439e+07	4.57634e+07	0.33032	0.05	NA	NA	9.55283e+06	1.05887e+07	4.47308e+06	6.1846e+06
tr|W5GYX5|W5GYX5_WHEAT	W5GYX5	GAPC8	Glyceraldehyde-3-phosphate dehydrogenase OS=Triticum aestivum GN=GAPC8 PE=2 SV=1	3872.86	0	31	tr|W5GYX5|W5GYX5_WHEAT	8.63366e+07	7.13377e+07	5.923e+07	7.23701e+07	7.18539e+07	0.153311	0.0724638	NA	NA	9.20678e+06	8.24629e+06	8.9039e+06	1.04968e+07
tr|W5AFW9|W5AFW9_WHEAT	W5AFW9	NA	Uncharacterized protein OS=Triticum aestivum PE=3 SV=1	3239.52	0	27	tr|W5AFW9|W5AFW9_WHEAT	5.21431e+07	4.71343e+07	4.33259e+07	6.04976e+07	4.96387e+07	0.146123	0.109375	NA	NA	8.97245e+06	8.23686e+06	8.80958e+06	1.25822e+07
tr|Q5I7K4|Q5I7K4_WHEAT	Q5I7K4	NA	Ribosomal protein L17 OS=Triticum aestivum PE=1 SV=1	3192.34	0	22	tr|Q5I7K4|Q5I7K4_WHEAT	5.42551e+07	4.79996e+07	1.51732e+07	1.95056e+07	3.37526e+07	0.577018	0.110656	NA	NA	7.63404e+06	6.90695e+06	1.69231e+06	3.62967e+06
tr|A0A1D5V9G7|A0A1D5V9G7_WHEAT	A0A1D5V9G7	NA	Uncharacterized protein OS=Triticum aestivum PE=3 SV=1	2279.93	0	25	tr|A0A1D5V9G7|A0A1D5V9G7_WHEAT	4.1156e+07	2.92704e+07	1.42334e+07	1.5669e+07	2.24697e+07	0.505468	0.0952381	NA	NA	6.05249e+06	4.20894e+06	2.47581e+06	2.51242e+06
tr|A0A1D5YIU1|A0A1D5YIU1_WHEAT	A0A1D5YIU1	NA	Uncharacterized protein OS=Triticum aestivum PE=4 SV=1	2002.06	0	20	tr|A0A1D5YIU1|A0A1D5YIU1_WHEAT	3.06039e+07	3.04357e+07	1.8066e+07	2.70869e+07	2.87613e+07	0.221565	0.0670732	NA	NA	5.8001e+06	6.45247e+06	2.71368e+06	4.69007e+06
tr|A0A1D5WW00|A0A1D5WW00_WHEAT	A0A1D5WW00	NA	Uncharacterized protein OS=Triticum aestivum PE=3 SV=1	2234.38	0	25	tr|A0A1D5WW00|A0A1D5WW00_WHEAT	2.35164e+07	3.28082e+07	2.69659e+07	3.40444e+07	2.9887e+07	0.16898	0.0865385	NA	NA	5.79656e+06	7.4865e+06	6.24261e+06	7.50573e+06
tr|D8L9M8|D8L9M8_WHEAT	D8L9M8	TAA_ctg0464b.00230.1	RNA recognition domain containing protein,expressed OS=Triticum aestivum GN=TAA_ctg0464b.00230.1 PE=4 SV=1	2605.28	0	26	tr|D8L9M8|D8L9M8_WHEAT	3.51143e+07	2.22114e+07	1.39566e+07	2.51315e+07	2.36715e+07	0.362344	0.0625	NA	NA	5.57728e+06	3.51711e+06	2.33808e+06	4.38641e+06
tr|A0A1D5UH99|A0A1D5UH99_WHEAT	A0A1D5UH99	NA	Uncharacterized protein OS=Triticum aestivum PE=4 SV=1	416.33	0	6	tr|A0A1D5UH99|A0A1D5UH99_WHEAT	1.90056e+07	2.33436e+07	1.51954e+07	1.68632e+07	1.79344e+07	0.189487	0	NA	NA	5.47293e+06	7.11625e+06	4.99085e+06	5.57676e+06
tr|W5G990|W5G990_WHEAT	W5G990	NA	Uncharacterized protein OS=Triticum aestivum PE=4 SV=1	876.57	0	11	tr|W5G990|W5G990_WHEAT	1.88669e+07	1.63247e+07	9.48706e+06	1.22913e+07	1.4308e+07	0.292716	0.0357143	NA	NA	5.2888e+06	4.87249e+06	2.80079e+06	3.7198e+06
tr|A0A1D5VXC3|A0A1D5VXC3_WHEAT	A0A1D5VXC3	NA	Importin subunit alpha OS=Triticum aestivum PE=3 SV=1	3752.97	0	40	tr|A0A1D5VXC3|A0A1D5VXC3_WHEAT	5.05263e+07	4.09381e+07	2.08244e+07	2.60799e+07	3.3509e+07	0.393612	0.108025	NA	NA	5.19347e+06	3.80531e+06	2.54456e+06	3.72098e+06
tr|A0A1D5UGY3|A0A1D5UGY3_WHEAT	A0A1D5UGY3	NA	Uncharacterized protein OS=Triticum aestivum PE=3 SV=1	2001.65	0	19	tr|A0A1D5UGY3|A0A1D5UGY3_WHEAT	3.94399e+07	3.60438e+07	1.80301e+07	1.76609e+07	2.70369e+07	0.416336	0.0878378	NA	NA	5.09146e+06	4.05414e+06	2.18727e+06	2.90403e+06
tr|W5AA91|W5AA91_WHEAT	W5AA91	NA	Importin subunit alpha OS=Triticum aestivum PE=3 SV=1	2802.27	0	35	tr|W5AA91|W5AA91_WHEAT	4.97113e+07	3.69857e+07	3.02489e+07	3.01491e+07	3.36173e+07	0.250162	0.0344828	NA	NA	5.0423e+06	4.76467e+06	3.60675e+06	4.15025e+06
tr|W5DP16|W5DP16_WHEAT	W5DP16	NA	UDP-glucose 6-dehydrogenase OS=Triticum aestivum PE=3 SV=1	2843.87	0	28	tr|W5DP16|W5DP16_WHEAT	2.63179e+07	2.86704e+07	1.75601e+07	2.15619e+07	2.39399e+07	0.210681	0.0441176	NA	NA	4.9525e+06	5.26635e+06	1.9993e+06	3.60512e+06
tr|A0A0C4BJJ3|A0A0C4BJJ3_WHEAT	A0A0C4BJJ3	NA	Uncharacterized protein OS=Triticum aestivum PE=3 SV=1	2068.72	0	20	tr|A0A0C4BJJ3|A0A0C4BJJ3_WHEAT	2.33436e+07	3.38286e+07	1.65223e+07	2.04726e+07	2.19081e+07	0.314595	0.0638298	NA	NA	4.90583e+06	7.41574e+06	3.57595e+06	4.56345e+06
tr|Q5I7K2|Q5I7K2_WHEAT	Q5I7K2	NA	Ribosomal protein S7 OS=Triticum aestivum PE=1 SV=1	1808.67	0	26	tr|Q5I7K2|Q5I7K2_WHEAT	2.61075e+07	1.4511e+07	1.91235e+07	2.7696e+07	2.26155e+07	0.281503	0.0945946	NA	NA	4.81331e+06	2.92184e+06	4.11538e+06	6.11599e+06
tr|A0A1D5WU65|A0A1D5WU65_WHEAT	A0A1D5WU65	NA	Uncharacterized protein OS=Triticum aestivum PE=3 SV=1	1986.43	0	17	tr|A0A1D5WU65|A0A1D5WU65_WHEAT	3.07889e+07	3.19627e+07	3.07394e+07	3.04155e+07	3.07641e+07	0.0218848	0.0743243	NA	NA	4.80591e+06	5.43635e+06	5.92103e+06	7.67656e+06
tr|A0A1D5UZW7|A0A1D5UZW7_WHEAT	A0A1D5UZW7	NA	Elongation factor 1-alpha OS=Triticum aestivum PE=3 SV=1	1050.71	0	12	tr|A0A1D5UZW7|A0A1D5UZW7_WHEAT	1.61706e+07	1.68401e+07	1.27417e+07	1.93314e+07	1.65054e+07	0.167023	0.0217391	NA	NA	4.59801e+06	4.84385e+06	2.40796e+06	5.29659e+06
tr|A0A1D5YU87|A0A1D5YU87_WHEAT	A0A1D5YU87	NA	Uncharacterized protein OS=Triticum aestivum PE=4 SV=1	1886.47	0	22	tr|A0A1D5YU87|A0A1D5YU87_WHEAT	2.8957e+07	2.75573e+07	1.01992e+07	9.76476e+06	1.88782e+07	0.552739	0.0328947	NA	NA	4.14463e+06	3.80045e+06	1.38748e+06	1.81102e+06
tr|A0A1D5WFA8|A0A1D5WFA8_WHEAT	A0A1D5WFA8	NA	Uncharacterized protein OS=Triticum aestivum PE=4 SV=1	79.83	0.00323974	2	tr|A0A1D5WFA8|A0A1D5WFA8_WHEAT	8.16507e+06	5.99685e+06	4.83668e+06	5.05818e+06	5.52751e+06	0.25266	0.166667	NA	NA	4.08253e+06	2.99842e+06	2.41834e+06	2.52909e+06
tr|A0A0C4BIW4|A0A0C4BIW4_WHEAT	A0A0C4BIW4	NA	Uncharacterized protein OS=Triticum aestivum PE=3 SV=1	1666.9	0	16	tr|A0A0C4BIW4|A0A0C4BIW4_WHEAT	2.88177e+07	1.99444e+07	2.84327e+07	3.52778e+07	2.86252e+07	0.223667	0.0878378	NA	NA	3.98804e+06	3.73773e+06	4.83291e+06	6.80089e+06
tr|A0A1D6D438|A0A1D6D438_WHEAT	A0A1D6D438	NA	3-oxoacyl-[acyl-carrier-protein] synthase OS=Triticum aestivum PE=3 SV=1	4011.8	0	29	tr|A0A1D6D438|A0A1D6D438_WHEAT	3.3704e+07	3.66773e+07	2.90858e+07	3.85589e+07	3.51907e+07	0.119678	0.0547945	NA	NA	3.94967e+06	4.1606e+06	2.27229e+06	4.37508e+06
tr|W5AQ98|W5AQ98_WHEAT	W5AQ98	NA	Peroxidase OS=Triticum aestivum PE=3 SV=1	1894.05	0	17	tr|W5AQ98|W5AQ98_WHEAT	2.11235e+07	1.88642e+07	1.66603e+07	2.20358e+07	1.99939e+07	0.122492	0.0483871	NA	NA	3.8948e+06	3.5782e+06	3.05111e+06	5.00629e+06
tr|W5BE38|W5BE38_WHEAT	W5BE38	NA	Oleosin OS=Triticum aestivum PE=3 SV=1	312.66	0	3	tr|W5BE38|W5BE38_WHEAT	1.16598e+07	1.33539e+07	2.38285e+07	2.32312e+07	1.82926e+07	0.355539	0	NA	NA	3.88661e+06	4.45131e+06	7.94284e+06	7.74375e+06
tr|A0A1D5SEL0|A0A1D5SEL0_WHEAT	A0A1D5SEL0	NA	Uncharacterized protein OS=Triticum aestivum PE=3 SV=1	1805.34	0	15	tr|A0A1D5SEL0|A0A1D5SEL0_WHEAT	2.14473e+07	2.21131e+07	1.50752e+07	2.0969e+07	2.12082e+07	0.163374	0.0172414	NA	NA	3.83256e+06	4.47599e+06	3.21119e+06	4.69392e+06
tr|A0A1D5V177|A0A1D5V177_WHEAT	A0A1D5V177	NA	Uncharacterized protein OS=Triticum aestivum PE=3 SV=1	3325.93	0	35	tr|A0A1D5V177|A0A1D5V177_WHEAT	2.93951e+07	3.33809e+07	3.17851e+07	4.14311e+07	3.2583e+07	0.15351	0.0709459	NA	NA	3.80965e+06	3.92528e+06	3.6287e+06	5.70533e+06
tr|A0A1D5W7H9|A0A1D5W7H9_WHEAT	A0A1D5W7H9	NA	Uncharacterized protein OS=Triticum aestivum PE=3 SV=1	1456.41	0	9	tr|A0A1D5W7H9|A0A1D5W7H9_WHEAT	1.53296e+07	1.00101e+07	4.14011e+06	6.64375e+06	8.3269e+06	0.53584	0.0480769	NA	NA	3.69409e+06	2.66581e+06	772341	1.60145e+06
tr|A0A1D5SD16|A0A1D5SD16_WHEAT	A0A1D5SD16	NA	Uncharacterized protein OS=Triticum aestivum PE=4 SV=1	5180.35	0	41	tr|A0A1D5SD16|A0A1D5SD16_WHEAT	3.88853e+07	1.20082e+08	1.40202e+08	1.45809e+08	1.30142e+08	0.444858	0.103535	NA	NA	3.68581e+06	1.19928e+07	1.85318e+07	2.19571e+07
tr|A0A0C4BKA8|A0A0C4BKA8_WHEAT	A0A0C4BKA8	NA	Uncharacterized protein OS=Triticum aestivum PE=3 SV=1	4674.78	0	38	tr|A0A0C4BKA8|A0A0C4BKA8_WHEAT	3.80237e+07	4.70977e+07	2.83866e+07	3.90226e+07	3.85231e+07	0.200955	0.0663265	NA	NA	3.66607e+06	5.00658e+06	2.40013e+06	3.73298e+06
tr|A0A1D6CYL4|A0A1D6CYL4_WHEAT	A0A1D6CYL4	NA	Uncharacterized protein OS=Triticum aestivum PE=3 SV=1	192.83	0	2	tr|A0A1D6CYL4|A0A1D6CYL4_WHEAT	7.31408e+06	6.05129e+06	1.17012e+07	7.0087e+06	7.16139e+06	0.313411	0	NA	NA	3.65704e+06	3.02564e+06	5.85062e+06	3.50435e+06
tr|A0A1D5UPJ6|A0A1D5UPJ6_WHEAT	A0A1D5UPJ6	NA	Pyruvate kinase OS=Triticum aestivum PE=3 SV=1	4072.99	0	41	tr|A0A1D5UPJ6|A0A1D5UPJ6_WHEAT	3.4867e+07	3.45853e+07	1.70887e+07	2.5834e+07	3.02097e+07	0.300798	0.0705128	NA	NA	3.56599e+06	4.31786e+06	1.54681e+06	3.15961e+06
tr|A0A1D5VHR3|A0A1D5VHR3_WHEAT	A0A1D5VHR3	NA	Uncharacterized protein OS=Triticum aestivum PE=4 SV=1	4356.67	0	55	tr|A0A1D5VHR3|A0A1D5VHR3_WHEAT	3.58328e+07	2.65057e+07	2.10147e+07	2.7627e+07	2.70664e+07	0.220477	0.0797872	NA	NA	3.54761e+06	2.79911e+06	1.94291e+06	2.97903e+06
tr|A0A1D5WJ34|A0A1D5WJ34_WHEAT	A0A1D5WJ34	NA	Uncharacterized protein OS=Triticum aestivum PE=4 SV=1	152.23	0	1	tr|A0A1D5WJ34|A0A1D5WJ34_WHEAT	3.49293e+06	511380	194049	1.71452e+06	1.11295e+06	1.01088	0	NA	NA	3.49293e+06	511380	194049	1.71452e+06
tr|A0A1D5XQU5|A0A1D5XQU5_WHEAT	A0A1D5XQU5	NA	Oleosin OS=Triticum aestivum PE=3 SV=1	116.47	0.000638978	2	tr|A0A1D5XQU5|A0A1D5XQU5_WHEAT	6.95895e+06	5.27518e+06	3.31983e+06	3.24098e+06	4.29751e+06	0.378068	0.125	NA	NA	3.47947e+06	2.63759e+06	1.65992e+06	1.62049e+06
tr|A0A1D5XJ56|A0A1D5XJ56_WHEAT	A0A1D5XJ56	NA	Uncharacterized protein OS=Triticum aestivum PE=3 SV=1	297.37	0	3	tr|A0A1D5XJ56|A0A1D5XJ56_WHEAT	1.04778e+07	1.46401e+07	6.08342e+06	8.58959e+06	9.53369e+06	0.362806	0.0357143	NA	NA	3.47051e+06	4.87994e+06	2.02776e+06	2.86237e+06
tr|A0A1D6D6L4|A0A1D6D6L4_WHEAT	A0A1D6D6L4	NA	Uncharacterized protein OS=Triticum aestivum PE=3 SV=1	1149.68	0	8	tr|A0A1D6D6L4|A0A1D6D6L4_WHEAT	1.32885e+07	1.64174e+07	5.89354e+06	7.23124e+06	1.02599e+07	0.465467	0.125	NA	NA	3.39326e+06	3.85499e+06	1.6788e+06	1.99333e+06
tr|W5DYF8|W5DYF8_WHEAT	W5DYF8	NA	Uncharacterized protein OS=Triticum aestivum PE=3 SV=1	6118.25	0	55	tr|W5DYF8|W5DYF8_WHEAT	3.47925e+07	4.70391e+07	2.7945e+07	3.66438e+07	3.57182e+07	0.215773	0.118534	NA	NA	3.32529e+06	4.68068e+06	3.70796e+06	5.0951e+06
tr|W5BH09|W5BH09_WHEAT	W5BH09	NA	Uncharacterized protein OS=Triticum aestivum PE=4 SV=1	5095.12	0	51	tr|W5BH09|W5BH09_WHEAT	2.88999e+07	2.00224e+07	3.8027e+07	2.83176e+07	2.86087e+07	0.255342	0.138021	NA	NA	3.28141e+06	2.8965e+06	6.01572e+06	4.9685e+06
tr|A0A077RXS4|A0A077RXS4_WHEAT	A0A077RXS4	TRAES_3BF045700010CFD_c1	Uncharacterized protein OS=Triticum aestivum GN=TRAES_3BF045700010CFD_c1 PE=3 SV=1	3802.13	0	41	tr|A0A077RXS4|A0A077RXS4_WHEAT	2.68566e+07	3.13752e+07	3.09988e+07	3.43737e+07	3.1187e+07	0.100009	0.0675676	NA	NA	3.23728e+06	3.11843e+06	3.59301e+06	4.66255e+06
tr|W5FQ55|W5FQ55_WHEAT	W5FQ55	NA	UDP-glucose 6-dehydrogenase OS=Triticum aestivum PE=3 SV=1	4693.46	0	46	tr|W5FQ55|W5FQ55_WHEAT	3.38437e+07	3.63142e+07	2.73348e+07	3.33789e+07	3.36113e+07	0.11654	0.0955056	NA	NA	3.09348e+06	3.92586e+06	3.13531e+06	3.13571e+06
tr|A0A1D5VDE9|A0A1D5VDE9_WHEAT	A0A1D5VDE9	NA	Uncharacterized protein OS=Triticum aestivum PE=3 SV=1	2634.14	0	27	tr|A0A1D5VDE9|A0A1D5VDE9_WHEAT	2.50271e+07	1.4415e+07	9.69966e+06	8.80956e+06	1.20573e+07	0.513829	0.0738636	NA	NA	3.08957e+06	1.99099e+06	981646	962451
tr|A0A1D6CXJ0|A0A1D6CXJ0_WHEAT	A0A1D6CXJ0	NA	Uncharacterized protein OS=Triticum aestivum PE=4 SV=1	2258.2	0	18	tr|A0A1D6CXJ0|A0A1D6CXJ0_WHEAT	2.353e+07	2.89322e+07	2.89992e+07	3.04425e+07	2.89657e+07	0.108834	0.0357143	NA	NA	3.0647e+06	4.90953e+06	3.57494e+06	5.23385e+06
tr|A0A1D5WK32|A0A1D5WK32_WHEAT	A0A1D5WK32	NA	Uncharacterized protein OS=Triticum aestivum PE=3 SV=1	1038.37	0	10	tr|A0A1D5WK32|A0A1D5WK32_WHEAT	1.27775e+07	1.0518e+07	5.53538e+06	8.55236e+06	9.53518e+06	0.328634	0.0238095	NA	NA	3.05249e+06	2.53319e+06	1.30643e+06	1.94311e+06
tr|A0A1D6CMV8|A0A1D6CMV8_WHEAT	A0A1D6CMV8	NA	Uncharacterized protein OS=Triticum aestivum PE=4 SV=1	2779.78	0	26	tr|A0A1D6CMV8|A0A1D6CMV8_WHEAT	2.89394e+07	3.12991e+07	2.30179e+07	2.87414e+07	2.88404e+07	0.12566	0.09	NA	NA	3.02906e+06	3.5584e+06	3.29705e+06	4.12877e+06
tr|A0A1D6RR56|A0A1D6RR56_WHEAT	A0A1D6RR56	NA	Glutamate decarboxylase OS=Triticum aestivum PE=3 SV=1	1957.98	0	29	tr|A0A1D6RR56|A0A1D6RR56_WHEAT	1.27736e+07	8.72414e+07	9.44936e+06	6.72451e+06	1.11115e+07	1.33834	0.0965909	NA	NA	2.98399e+06	2.804e+07	2.31601e+06	1.00336e+06
tr|W5E0G4|W5E0G4_WHEAT	W5E0G4	NA	Uncharacterized protein OS=Triticum aestivum PE=4 SV=1	2564.53	0	25	tr|W5E0G4|W5E0G4_WHEAT	2.29323e+07	1.68482e+07	2.12256e+07	2.36119e+07	2.20789e+07	0.143767	0.0816327	NA	NA	2.93569e+06	2.35132e+06	4.51201e+06	3.99329e+06
tr|A0A0C4BKL3|A0A0C4BKL3_WHEAT	A0A0C4BKL3	NA	Uncharacterized protein OS=Triticum aestivum PE=3 SV=1	4410	0	39	tr|A0A0C4BKL3|A0A0C4BKL3_WHEAT	3.2316e+07	3.86136e+07	3.45819e+07	4.68005e+07	3.65977e+07	0.16733	0.076087	NA	NA	2.8873e+06	3.67437e+06	4.00147e+06	5.83939e+06
tr|A0A0C4BK41|A0A0C4BK41_WHEAT	A0A0C4BK41	NA	Uncharacterized protein OS=Triticum aestivum PE=3 SV=1	3753.3	0	40	tr|A0A0C4BK41|A0A0C4BK41_WHEAT	2.49291e+07	3.05644e+07	2.90675e+07	3.40302e+07	2.98159e+07	0.127174	0.0474684	NA	NA	2.78485e+06	3.41489e+06	2.62812e+06	4.25767e+06
tr|W5EE00|W5EE00_WHEAT	W5EE00	NA	Uncharacterized protein OS=Triticum aestivum PE=3 SV=1	1394.46	0	13	tr|W5EE00|W5EE00_WHEAT	1.23407e+07	9.80111e+06	8.32793e+06	9.6156e+06	9.70835e+06	0.167572	0.108333	NA	NA	2.65141e+06	2.32151e+06	1.52561e+06	1.93745e+06
tr|W5FAY5|W5FAY5_WHEAT	W5FAY5	NA	Actin OS=Triticum aestivum PE=2 SV=1	1386.89	0	12	tr|W5FAY5|W5FAY5_WHEAT	9.71443e+06	1.18283e+07	5.2831e+06	9.70368e+06	9.70906e+06	0.301541	0.07	NA	NA	2.6458e+06	3.463e+06	1.07468e+06	1.7212e+06
tr|A0A1D6D4U2|A0A1D6D4U2_WHEAT	A0A1D6D4U2	NA	Uncharacterized protein OS=Triticum aestivum PE=4 SV=1	1482.75	0	18	tr|A0A1D6D4U2|A0A1D6D4U2_WHEAT	1.1483e+07	9.98173e+06	6.70927e+06	4.7678e+06	8.3455e+06	0.370632	0.166667	NA	NA	2.6297e+06	2.30541e+06	1.57366e+06	1.09689e+06
tr|A0A1D5XVS5|A0A1D5XVS5_WHEAT	A0A1D5XVS5	NA	Uncharacterized protein OS=Triticum aestivum PE=4 SV=1	2963.53	0	29	tr|A0A1D5XVS5|A0A1D5XVS5_WHEAT	2.27817e+07	1.90262e+07	2.3053e+07	2.20303e+07	2.2406e+07	0.0851194	0.0889831	NA	NA	2.59397e+06	3.06218e+06	3.61744e+06	2.92859e+06
tr|A0A1D6RLN8|A0A1D6RLN8_WHEAT	A0A1D6RLN8	NA	Uncharacterized protein OS=Triticum aestivum PE=3 SV=1	1069.7	0	11	tr|A0A1D6RLN8|A0A1D6RLN8_WHEAT	1.52432e+07	1.53535e+07	5.76861e+06	6.66785e+06	1.09555e+07	0.488501	0.102273	NA	NA	2.57063e+06	2.56107e+06	1.08349e+06	1.51171e+06
tr|W5C5N9|W5C5N9_WHEAT	W5C5N9	NA	Uncharacterized protein OS=Triticum aestivum PE=4 SV=1	2202.29	0	21	tr|W5C5N9|W5C5N9_WHEAT	1.65933e+07	2.27009e+07	7.82678e+06	9.24068e+06	1.2917e+07	0.490257	0.05625	NA	NA	2.55441e+06	3.69128e+06	1.26689e+06	1.2043e+06
tr|A0A1D5Y1E2|A0A1D5Y1E2_WHEAT	A0A1D5Y1E2	NA	Uncharacterized protein OS=Triticum aestivum PE=3 SV=1	868.29	0	11	tr|A0A1D5Y1E2|A0A1D5Y1E2_WHEAT	9.0881e+06	9.59706e+06	7.29225e+06	8.95492e+06	9.02151e+06	0.114463	0.078125	NA	NA	2.48223e+06	2.70604e+06	2.24081e+06	2.76114e+06
tr|Q332R4|Q332R4_WHEAT	Q332R4	atp1	ATP synthase subunit alpha OS=Triticum aestivum GN=atp1 PE=3 SV=1	3055.82	0	35	tr|Q332R4|Q332R4_WHEAT	2.68916e+07	2.439e+07	2.29938e+07	2.0204e+07	2.36919e+07	0.118133	0.029661	NA	NA	2.44544e+06	2.54836e+06	1.87603e+06	1.84454e+06
tr|W5BJL9|W5BJL9_WHEAT	W5BJL9	NA	Uncharacterized protein OS=Triticum aestivum PE=4 SV=1	1747.47	0	21	tr|W5BJL9|W5BJL9_WHEAT	1.67731e+07	1.63661e+07	1.19124e+07	2.05386e+07	1.65696e+07	0.215346	0.0530303	NA	NA	2.43972e+06	2.71073e+06	2.40638e+06	5.07542e+06
tr|A0A1D5UU64|A0A1D5UU64_WHEAT	A0A1D5UU64	NA	Uncharacterized protein OS=Triticum aestivum PE=4 SV=1	1578.07	0	11	tr|A0A1D5UU64|A0A1D5UU64_WHEAT	1.06894e+07	1.16365e+07	5.65377e+06	7.86242e+06	9.27593e+06	0.304203	0.09375	NA	NA	2.43704e+06	2.83336e+06	986876	1.50219e+06
tr|A0A1D5WWG7|A0A1D5WWG7_WHEAT	A0A1D5WWG7	NA	Uncharacterized protein OS=Triticum aestivum PE=3 SV=1	1900.91	0	23	tr|A0A1D5WWG7|A0A1D5WWG7_WHEAT	1.03424e+07	3.19106e+07	1.98841e+07	2.48429e+07	2.23635e+07	0.41679	0.161111	NA	NA	2.40795e+06	6.65683e+06	4.41429e+06	6.26119e+06
tr|A0A1D5YB13|A0A1D5YB13_WHEAT	A0A1D5YB13	NA	Uncharacterized protein OS=Triticum aestivum PE=3 SV=1	1474.81	0	18	tr|A0A1D5YB13|A0A1D5YB13_WHEAT	1.25364e+07	2.96475e+07	3.33138e+07	4.24142e+07	3.14807e+07	0.424206	0.0735294	NA	NA	2.38896e+06	5.62964e+06	6.99302e+06	1.04924e+07
tr|W5CDW4|W5CDW4_WHEAT	W5CDW4	NA	Uncharacterized protein OS=Triticum aestivum PE=4 SV=1	1448.61	0	18	tr|W5CDW4|W5CDW4_WHEAT	1.07028e+07	1.95439e+07	1.14276e+07	1.50174e+07	1.32225e+07	0.285559	0.125	NA	NA	2.31675e+06	4.23429e+06	2.72019e+06	3.76307e+06
tr|W5C8N6|W5C8N6_WHEAT	W5C8N6	NA	40S ribosomal protein S6 OS=Triticum aestivum PE=3 SV=1	2522.68	0	29	tr|W5C8N6|W5C8N6_WHEAT	1.89447e+07	1.44926e+07	2.67107e+07	3.13399e+07	2.28277e+07	0.33113	0.106383	NA	NA	2.30247e+06	1.8428e+06	5.77933e+06	6.30768e+06
tr|A0A1D5W815|A0A1D5W815_WHEAT	A0A1D5W815	NA	Uncharacterized protein OS=Triticum aestivum PE=3 SV=1	218.04	0	1	tr|A0A1D5W815|A0A1D5W815_WHEAT	2.26493e+06	2.50003e+06	1.79717e+06	1.87192e+06	2.06842e+06	0.157454	0	NA	NA	2.26493e+06	2.50003e+06	1.79717e+06	1.87192e+06
tr|Q0Q0I7|Q0Q0I7_WHEAT	Q0Q0I7	HSP90-2	Heat shock protein 90 OS=Triticum aestivum GN=HSP90-2 PE=1 SV=1	5255.81	0	51	tr|Q0Q0I7|Q0Q0I7_WHEAT	2.5417e+07	2.09577e+07	2.34477e+07	2.76673e+07	2.44323e+07	0.117163	0.09	NA	NA	2.2117e+06	1.90824e+06	2.51276e+06	2.581e+06
tr|A0A1D5WPA9|A0A1D5WPA9_WHEAT	A0A1D5WPA9	NA	Uncharacterized protein OS=Triticum aestivum PE=3 SV=1	1857.37	0	16	tr|A0A1D5WPA9|A0A1D5WPA9_WHEAT	1.52148e+07	1.5752e+07	9.80586e+06	1.2234e+07	1.37244e+07	0.209013	0.0661765	NA	NA	2.20612e+06	2.092e+06	1.28426e+06	1.59707e+06
tr|A0A1D5VWU2|A0A1D5VWU2_WHEAT	A0A1D5VWU2	NA	Uncharacterized protein OS=Triticum aestivum PE=4 SV=1	2563.05	0	25	tr|A0A1D5VWU2|A0A1D5VWU2_WHEAT	1.74846e+07	1.94391e+07	9.90612e+06	1.17813e+07	1.46329e+07	0.309511	0.13587	NA	NA	2.17232e+06	3.06753e+06	1.31261e+06	1.26171e+06
tr|A0A1D5SB26|A0A1D5SB26_WHEAT	A0A1D5SB26	NA	Uncharacterized protein OS=Triticum aestivum PE=4 SV=1	83.59	0.00276549	1	tr|A0A1D5SB26|A0A1D5SB26_WHEAT	2.15902e+06	1.40567e+06	5.70861e+06	3.00561e+06	2.58231e+06	0.611366	0	NA	NA	2.15902e+06	1.40567e+06	5.70861e+06	3.00561e+06
tr|A0A1D5VCB5|A0A1D5VCB5_WHEAT	A0A1D5VCB5	NA	Uncharacterized protein OS=Triticum aestivum PE=4 SV=1	180.61	0	2	tr|A0A1D5VCB5|A0A1D5VCB5_WHEAT	4.29193e+06	161822	245568	1.93985e+06	1.09271e+06	1.16673	0	NA	NA	2.14596e+06	80910.8	122784	969924
tr|W5CPX1|W5CPX1_WHEAT	W5CPX1	TRAES_3BF139100030CFD_c1	Uncharacterized protein OS=Triticum aestivum GN=TRAES_3BF139100030CFD_c1 PE=3 SV=1	145.77	0	2	tr|W5CPX1|W5CPX1_WHEAT	4.28082e+06	5.02755e+06	914589	387568	2.59771e+06	0.882565	0	NA	NA	2.14041e+06	2.51377e+06	457295	193784
tr|A0A1D5XVT4|A0A1D5XVT4_WHEAT	A0A1D5XVT4	NA	Uncharacterized protein OS=Triticum aestivum PE=3 SV=1	4642.21	0	45	tr|A0A1D5XVT4|A0A1D5XVT4_WHEAT	1.8266e+07	1.98377e+07	1.06508e+07	1.24486e+07	1.53573e+07	0.290162	0.109756	NA	NA	2.13995e+06	2.21153e+06	841559	1.08263e+06
tr|W5AQ78|W5AQ78_WHEAT	W5AQ78	Clo1	Caleosin OS=Triticum aestivum GN=Clo1 PE=2 SV=1	2712.54	0	21	tr|W5AQ78|W5AQ78_WHEAT	1.27345e+07	1.01737e+07	5.8271e+07	3.66117e+07	2.46731e+07	0.767623	0.110577	NA	NA	2.11062e+06	1.67139e+06	8.53135e+06	6.1429e+06
tr|A0A1D6DIT0|A0A1D6DIT0_WHEAT	A0A1D6DIT0	NA	60S ribosomal protein L13 OS=Triticum aestivum PE=3 SV=1	2428.29	0	28	tr|A0A1D6DIT0|A0A1D6DIT0_WHEAT	1.32227e+07	3.95129e+07	3.43394e+07	4.0194e+07	3.69262e+07	0.398181	0.133621	NA	NA	2.10768e+06	6.96262e+06	5.13119e+06	7.55049e+06
tr|A0A1D5UL37|A0A1D5UL37_WHEAT	A0A1D5UL37	NA	Peroxidase OS=Triticum aestivum PE=3 SV=1	729.49	0	8	tr|A0A1D5UL37|A0A1D5UL37_WHEAT	8.78688e+06	9.15418e+06	5.62418e+06	6.9676e+06	7.87724e+06	0.215578	0.0681818	NA	NA	2.09907e+06	2.21865e+06	1.31342e+06	1.78854e+06
tr|A0A1D6S991|A0A1D6S991_WHEAT	A0A1D6S991	NA	Isocitrate dehydrogenase [NAD] subunit, mitochondrial OS=Triticum aestivum PE=3 SV=1	1455.37	0	22	tr|A0A1D6S991|A0A1D6S991_WHEAT	1.08673e+07	9.68623e+06	8.61716e+06	1.19453e+07	1.02768e+07	0.14026	0.0234375	NA	NA	2.08205e+06	2.03031e+06	1.26378e+06	1.82494e+06
tr|A0A1D5Z7X9|A0A1D5Z7X9_WHEAT	A0A1D5Z7X9	NA	Uncharacterized protein OS=Triticum aestivum PE=3 SV=1	2739.43	0	29	tr|A0A1D5Z7X9|A0A1D5Z7X9_WHEAT	1.61241e+07	1.69781e+07	1.48288e+07	1.93689e+07	1.65511e+07	0.11366	0.0909091	NA	NA	2.07308e+06	1.85208e+06	1.81293e+06	2.54092e+06
tr|A0A1D5YTD0|A0A1D5YTD0_WHEAT	A0A1D5YTD0	NA	Uncharacterized protein OS=Triticum aestivum PE=4 SV=1	1964.02	0	28	tr|A0A1D5YTD0|A0A1D5YTD0_WHEAT	1.49919e+07	4.81308e+07	4.72263e+07	6.91304e+07	4.76786e+07	0.497922	0.156863	NA	NA	2.06199e+06	6.97263e+06	8.63132e+06	1.40309e+07
tr|A0A1D5Y256|A0A1D5Y256_WHEAT	A0A1D5Y256	NA	Uncharacterized protein OS=Triticum aestivum PE=3 SV=1	412.41	0	3	tr|A0A1D5Y256|A0A1D5Y256_WHEAT	6.43017e+06	1.19406e+07	1.08159e+07	1.01526e+07	1.04842e+07	0.242682	0.125	NA	NA	2.045e+06	3.9308e+06	3.50087e+06	3.3099e+06
tr|W5ERI9|W5ERI9_WHEAT	W5ERI9	NA	Non-specific lipid-transfer protein OS=Triticum aestivum PE=3 SV=1	705.86	0	8	tr|W5ERI9|W5ERI9_WHEAT	8.85777e+06	1.00589e+07	5.72747e+06	5.05171e+06	7.29262e+06	0.325368	0.116667	NA	NA	2.04358e+06	2.38965e+06	1.72786e+06	1.5311e+06
tr|A0A1D5YEH0|A0A1D5YEH0_WHEAT	A0A1D5YEH0	NA	Uncharacterized protein OS=Triticum aestivum PE=4 SV=1	2894.83	0	41	tr|A0A1D5YEH0|A0A1D5YEH0_WHEAT	2.08848e+07	1.98357e+07	2.35332e+07	2.68624e+07	2.2209e+07	0.137649	0.0666667	NA	NA	2.03756e+06	1.79709e+06	3.1717e+06	2.62376e+06
tr|A0A1D5T2G9|A0A1D5T2G9_WHEAT	A0A1D5T2G9	NA	Uncharacterized protein OS=Triticum aestivum PE=4 SV=1	1594.34	0	17	tr|A0A1D5T2G9|A0A1D5T2G9_WHEAT	1.08469e+07	1.70931e+07	2.703e+07	2.73398e+07	2.20615e+07	0.390985	0.0416667	NA	NA	2.0268e+06	3.48522e+06	6.1343e+06	5.79365e+06
tr|W5H7N5|W5H7N5_WHEAT	W5H7N5	NA	Uncharacterized protein OS=Triticum aestivum PE=4 SV=1	552.39	0	5	tr|W5H7N5|W5H7N5_WHEAT	6.53248e+06	7.15865e+06	1.59237e+06	2.16562e+06	4.34905e+06	0.662112	0.0208333	NA	NA	2.00375e+06	2.13443e+06	449500	689471
tr|W5DYH1|W5DYH1_WHEAT	W5DYH1	NA	Uncharacterized protein OS=Triticum aestivum PE=3 SV=1	2714.32	0	25	tr|W5DYH1|W5DYH1_WHEAT	1.35563e+07	1.7468e+07	1.17393e+07	1.5464e+07	1.45101e+07	0.169376	0.184426	NA	NA	1.98084e+06	2.57513e+06	2.02346e+06	2.6458e+06
tr|A0A1D5SLI4|A0A1D5SLI4_WHEAT	A0A1D5SLI4	NA	40S ribosomal protein S4 OS=Triticum aestivum PE=3 SV=1	3756.31	0	38	tr|A0A1D5SLI4|A0A1D5SLI4_WHEAT	2.33723e+07	2.0843e+07	2.98853e+07	4.98867e+07	2.66288e+07	0.424453	0.090625	NA	NA	1.98018e+06	2.11208e+06	3.35255e+06	7.20721e+06
tr|Q96185|Q96185_WHEAT	Q96185	SOD3.1	Superoxide dismutase OS=Triticum aestivum GN=SOD3.1 PE=2 SV=1	1724.51	0	16	tr|Q96185|Q96185_WHEAT	1.30965e+07	1.44097e+07	1.34574e+07	1.58252e+07	1.39336e+07	0.0858305	0.0588235	NA	NA	1.96292e+06	1.70225e+06	2.65154e+06	2.73086e+06
tr|A0A1D5UKZ4|A0A1D5UKZ4_WHEAT	A0A1D5UKZ4	NA	40S ribosomal protein S8 OS=Triticum aestivum PE=3 SV=1	1806.52	0	19	tr|A0A1D5UKZ4|A0A1D5UKZ4_WHEAT	1.14371e+07	1.02763e+07	1.42728e+07	2.0305e+07	1.2855e+07	0.318421	0.0530303	NA	NA	1.93745e+06	1.80802e+06	2.96737e+06	4.61514e+06
tr|A0A1D5VUW7|A0A1D5VUW7_WHEAT	A0A1D5VUW7	NA	Uncharacterized protein OS=Triticum aestivum PE=3 SV=1	1429.91	0	13	tr|A0A1D5VUW7|A0A1D5VUW7_WHEAT	9.39018e+06	5.08956e+06	1.07264e+07	1.55047e+07	1.00583e+07	0.421415	0.0833333	NA	NA	1.9295e+06	1.17037e+06	1.6579e+06	3.43067e+06
tr|A0A1D5TK37|A0A1D5TK37_WHEAT	A0A1D5TK37	NA	Uncharacterized protein OS=Triticum aestivum PE=4 SV=1	3233.69	0	34	tr|A0A1D5TK37|A0A1D5TK37_WHEAT	1.53266e+07	1.20087e+07	9.31426e+06	1.19685e+07	1.19886e+07	0.202562	0.131356	NA	NA	1.91034e+06	1.39525e+06	1.14474e+06	1.65021e+06
tr|W5ECA4|W5ECA4_WHEAT	W5ECA4	NA	Uncharacterized protein OS=Triticum aestivum PE=4 SV=1	3053.77	0	40	tr|W5ECA4|W5ECA4_WHEAT	1.6912e+07	1.45562e+07	2.57327e+07	2.47486e+07	2.08303e+07	0.272689	0.14759	NA	NA	1.89934e+06	1.36567e+06	3.91213e+06	3.3358e+06
tr|W5ERE6|W5ERE6_WHEAT	W5ERE6	NA	Uncharacterized protein OS=Triticum aestivum PE=3 SV=1	2630.14	0	34	tr|W5ERE6|W5ERE6_WHEAT	1.35939e+07	7.9885e+06	4.79395e+06	5.68154e+06	6.83502e+06	0.493581	0.104545	NA	NA	1.8964e+06	933619	694524	826002
tr|W5AB71|W5AB71_WHEAT	W5AB71	NA	Uncharacterized protein OS=Triticum aestivum PE=4 SV=1	2375.2	0	25	tr|W5AB71|W5AB71_WHEAT	1.54673e+07	1.47426e+07	1.59227e+07	1.71914e+07	1.5695e+07	0.0649952	0.0744681	NA	NA	1.89238e+06	2.34786e+06	2.6819e+06	2.70946e+06
tr|A0A1D5U7G3|A0A1D5U7G3_WHEAT	A0A1D5U7G3	NA	Uncharacterized protein OS=Triticum aestivum PE=3 SV=1	3430.19	0	44	tr|A0A1D5U7G3|A0A1D5U7G3_WHEAT	2.37274e+07	2.70558e+07	2.19688e+07	2.88454e+07	2.53916e+07	0.122795	0.0737179	NA	NA	1.87934e+06	2.05723e+06	1.67534e+06	2.68292e+06
tr|A0A1D5Z340|A0A1D5Z340_WHEAT	A0A1D5Z340	NA	Uncharacterized protein OS=Triticum aestivum PE=4 SV=1	2697.34	0	36	tr|A0A1D5Z340|A0A1D5Z340_WHEAT	1.16036e+07	4.06731e+07	3.59839e+07	4.74665e+07	3.83285e+07	0.46016	0.115079	NA	NA	1.87882e+06	6.37922e+06	5.60017e+06	8.19937e+06
tr|A0A1D5S807|A0A1D5S807_WHEAT	A0A1D5S807	NA	Uncharacterized protein OS=Triticum aestivum PE=3 SV=1	2488.31	0	30	tr|A0A1D5S807|A0A1D5S807_WHEAT	1.05331e+07	1.59283e+07	1.24388e+07	1.35068e+07	1.29728e+07	0.171753	0.100962	NA	NA	1.86812e+06	2.27243e+06	2.14777e+06	2.66084e+06
tr|A0A1D6D9J4|A0A1D6D9J4_WHEAT	A0A1D6D9J4	NA	Polyadenylate-binding protein OS=Triticum aestivum PE=3 SV=1	2423.44	0	26	tr|A0A1D6D9J4|A0A1D6D9J4_WHEAT	1.6613e+07	6.78476e+06	3.27662e+06	4.49552e+06	5.64014e+06	0.777352	0.119565	NA	NA	1.83428e+06	881797	399312	679123
tr|W5I035|W5I035_WHEAT	W5I035	NA	Uncharacterized protein OS=Triticum aestivum PE=3 SV=1	1137.28	0	11	tr|W5I035|W5I035_WHEAT	9.39005e+06	9.93343e+06	7.92639e+06	5.38282e+06	8.65822e+06	0.24946	0.136364	NA	NA	1.8339e+06	2.02609e+06	1.80619e+06	1.12496e+06
tr|W5A8E0|W5A8E0_WHEAT	W5A8E0	NA	Uncharacterized protein OS=Triticum aestivum PE=4 SV=1	1914.1	0	25	tr|W5A8E0|W5A8E0_WHEAT	1.11983e+07	3.41299e+07	2.48585e+07	3.04455e+07	2.7652e+07	0.399744	0.115854	NA	NA	1.8338e+06	5.58739e+06	3.72677e+06	6.16042e+06
tr|A0A1D6RXF7|A0A1D6RXF7_WHEAT	A0A1D6RXF7	NA	40S ribosomal protein S3a OS=Triticum aestivum PE=3 SV=1	2959.24	0	30	tr|A0A1D6RXF7|A0A1D6RXF7_WHEAT	1.44221e+07	1.27462e+07	2.22988e+07	2.73343e+07	1.83605e+07	0.356106	0.0833333	NA	NA	1.80502e+06	1.73761e+06	4.13293e+06	4.26712e+06
tr|A0A1D5ZZT8|A0A1D5ZZT8_WHEAT	A0A1D5ZZT8	NA	Uncharacterized protein OS=Triticum aestivum PE=4 SV=1	1897.58	0	26	tr|A0A1D5ZZT8|A0A1D5ZZT8_WHEAT	1.03378e+07	8.01575e+06	1.52384e+07	1.79181e+07	1.27881e+07	0.35036	0.119318	NA	NA	1.7846e+06	1.17244e+06	3.45983e+06	3.99051e+06
tr|A0A1D6D9R8|A0A1D6D9R8_WHEAT	A0A1D6D9R8	NA	Uncharacterized protein OS=Triticum aestivum PE=3 SV=1	1018.95	0	9	tr|A0A1D6D9R8|A0A1D6D9R8_WHEAT	8.54006e+06	8.5055e+06	2.39247e+06	2.93243e+06	5.71896e+06	0.606275	0.0921053	NA	NA	1.77515e+06	1.75752e+06	442255	664418
tr|A0A096UT91|A0A096UT91_WHEAT	A0A096UT91	NA	Uncharacterized protein OS=Triticum aestivum PE=4 SV=1	3032.98	0	36	tr|A0A096UT91|A0A096UT91_WHEAT	9.38457e+06	3.79384e+07	3.05826e+07	3.49081e+07	3.27453e+07	0.45753	0.152174	NA	NA	1.77159e+06	7.86667e+06	5.02206e+06	6.77154e+06
tr|A0A1D6A748|A0A1D6A748_WHEAT	A0A1D6A748	NA	Uncharacterized protein OS=Triticum aestivum PE=3 SV=1	1133.42	0	12	tr|A0A1D6A748|A0A1D6A748_WHEAT	7.17865e+06	2.7503e+07	1.8275e+07	2.0328e+07	1.93015e+07	0.459364	0.0803571	NA	NA	1.77114e+06	6.18317e+06	3.45466e+06	4.06528e+06
tr|W5AVS5|W5AVS5_WHEAT	W5AVS5	NA	Uncharacterized protein OS=Triticum aestivum PE=4 SV=1	1746.98	0	19	tr|W5AVS5|W5AVS5_WHEAT	1.05662e+07	9.75958e+06	1.11961e+07	1.80797e+07	1.08811e+07	0.308987	0.0763889	NA	NA	1.76215e+06	1.77147e+06	2.41378e+06	3.2378e+06
tr|W5EBF3|W5EBF3_WHEAT	W5EBF3	NA	Uncharacterized protein OS=Triticum aestivum PE=3 SV=1	1497.67	0	19	tr|W5EBF3|W5EBF3_WHEAT	8.93422e+06	5.24481e+06	9.00601e+06	8.6085e+06	8.77136e+06	0.227803	0.132812	NA	NA	1.75662e+06	798858	1.70133e+06	1.88146e+06
tr|W5ASA4|W5ASA4_WHEAT	W5ASA4	NA	Uncharacterized protein OS=Triticum aestivum PE=3 SV=1	1217.34	0	13	tr|W5ASA4|W5ASA4_WHEAT	7.43304e+06	4.65336e+06	9.36105e+06	5.22002e+06	6.32653e+06	0.323949	0.125	NA	NA	1.75524e+06	875480	2.69601e+06	1.15999e+06
tr|A0A1D6RL87|A0A1D6RL87_WHEAT	A0A1D6RL87	NA	Uncharacterized protein OS=Triticum aestivum PE=4 SV=1	4089.72	0	40	tr|A0A1D6RL87|A0A1D6RL87_WHEAT	1.84692e+07	1.93797e+07	1.67008e+07	2.29219e+07	1.89244e+07	0.135141	0.103659	NA	NA	1.73918e+06	2.52268e+06	2.18515e+06	3.06598e+06
tr|A0A1D6D6D5|A0A1D6D6D5_WHEAT	A0A1D6D6D5	NA	Uncharacterized protein OS=Triticum aestivum PE=4 SV=1	570.96	0	7	tr|A0A1D6D6D5|A0A1D6D6D5_WHEAT	5.71852e+06	4.61384e+06	1.87189e+06	1.6925e+06	3.24287e+06	0.577532	0.145833	NA	NA	1.73412e+06	1.44443e+06	589707	542220
tr|A0A1D5XPW9|A0A1D5XPW9_WHEAT	A0A1D5XPW9	NA	Uncharacterized protein OS=Triticum aestivum PE=4 SV=1	1988.2	0	27	tr|A0A1D5XPW9|A0A1D5XPW9_WHEAT	1.17494e+07	9.49091e+06	9.69282e+06	1.04372e+07	1.0065e+07	0.098847	0.0365854	NA	NA	1.70703e+06	1.12764e+06	1.71632e+06	1.8697e+06
tr|Q6V959|Q6V959_WHEAT	Q6V959	RPL3	Ribosomal protein L3 OS=Triticum aestivum GN=RPL3 PE=2 SV=1	4568.2	0	46	tr|Q6V959|Q6V959_WHEAT	1.37659e+07	4.82777e+07	6.76562e+07	8.38449e+07	5.79669e+07	0.56477	0.0909091	NA	NA	1.70307e+06	4.98521e+06	5.8164e+06	1.38213e+07
tr|W5DEJ5|W5DEJ5_WHEAT	W5DEJ5	TRAES_3BF074400050CFD_c1	Uncharacterized protein OS=Triticum aestivum GN=TRAES_3BF074400050CFD_c1 PE=4 SV=1	1677.55	0	16	tr|W5DEJ5|W5DEJ5_WHEAT	7.9178e+06	1.60364e+07	1.66345e+07	1.546e+07	1.57482e+07	0.291968	0.111111	NA	NA	1.68969e+06	3.8247e+06	4.14832e+06	4.15408e+06
tr|W5F823|W5F823_WHEAT	W5F823	NA	Uncharacterized protein OS=Triticum aestivum PE=4 SV=1	1731.61	0	19	tr|W5F823|W5F823_WHEAT	1.08299e+07	1.22043e+07	1.10982e+07	1.19722e+07	1.15352e+07	0.0576965	0.10119	NA	NA	1.68933e+06	1.93266e+06	1.83094e+06	2.34505e+06
tr|W5BFB4|W5BFB4_WHEAT	W5BFB4	NA	Histone H2B OS=Triticum aestivum PE=3 SV=1	1056.72	0	10	tr|W5BFB4|W5BFB4_WHEAT	7.99137e+06	6.80978e+06	1.5387e+07	1.0565e+07	9.27821e+06	0.373362	0.0125	NA	NA	1.67939e+06	1.48108e+06	3.53513e+06	2.70389e+06
tr|W5EB42|W5EB42_WHEAT	W5EB42	NA	Uncharacterized protein OS=Triticum aestivum PE=3 SV=1	1194.75	0	15	tr|W5EB42|W5EB42_WHEAT	9.15356e+06	1.08046e+07	1.01043e+07	1.18177e+07	1.04545e+07	0.107425	0.0967742	NA	NA	1.67422e+06	1.7981e+06	1.71628e+06	2.45253e+06
tr|A0A1D5ZVS8|A0A1D5ZVS8_WHEAT	A0A1D5ZVS8	NA	Uncharacterized protein OS=Triticum aestivum PE=4 SV=1	4406.53	0	48	tr|A0A1D5ZVS8|A0A1D5ZVS8_WHEAT	2.14507e+07	2.21249e+07	1.92127e+07	2.14071e+07	2.14289e+07	0.060214	0.0688776	NA	NA	1.64012e+06	1.80039e+06	1.80075e+06	1.75978e+06
tr|W5GCF7|W5GCF7_WHEAT	W5GCF7	NA	Uncharacterized protein OS=Triticum aestivum PE=4 SV=1	4932.57	0	50	tr|W5GCF7|W5GCF7_WHEAT	2.28716e+07	2.68838e+07	1.90367e+07	2.78628e+07	2.48777e+07	0.167318	0.0529412	NA	NA	1.63149e+06	2.61185e+06	1.65929e+06	3.05643e+06
tr|A0A1D6CVG5|A0A1D6CVG5_WHEAT	A0A1D6CVG5	NA	Uncharacterized protein OS=Triticum aestivum PE=4 SV=1	1950.36	0	26	tr|A0A1D6CVG5|A0A1D6CVG5_WHEAT	9.01584e+06	9.71308e+06	6.30058e+06	7.98109e+06	8.49847e+06	0.179724	0.0952381	NA	NA	1.62679e+06	1.54827e+06	682700	1.13234e+06
tr|A0A1D5V3G5|A0A1D5V3G5_WHEAT	A0A1D5V3G5	NA	Uncharacterized protein OS=Triticum aestivum PE=3 SV=1	1040.28	0	10	tr|A0A1D5V3G5|A0A1D5V3G5_WHEAT	8.00664e+06	2.09858e+07	1.90957e+07	2.71803e+07	2.00408e+07	0.424691	0.0357143	NA	NA	1.62192e+06	4.32579e+06	4.54698e+06	6.9923e+06
tr|W5EP45|W5EP45_WHEAT	W5EP45	NA	Ribosomal protein S25 OS=Triticum aestivum PE=4 SV=1	1252.58	0	15	tr|W5EP45|W5EP45_WHEAT	8.92447e+06	6.30892e+06	9.27217e+06	9.5395e+06	9.09832e+06	0.175023	0.076087	NA	NA	1.61972e+06	1.44794e+06	1.20957e+06	1.42616e+06
tr|W5HPC1|W5HPC1_WHEAT	W5HPC1	NA	60S acidic ribosomal protein P0 OS=Triticum aestivum PE=3 SV=1	1966.17	0	29	tr|W5HPC1|W5HPC1_WHEAT	1.00363e+07	2.74123e+07	1.66329e+07	2.24129e+07	1.95229e+07	0.391667	0.122222	NA	NA	1.61654e+06	4.07871e+06	2.39097e+06	3.42404e+06
tr|W5FIH8|W5FIH8_WHEAT	W5FIH8	NA	Uncharacterized protein OS=Triticum aestivum PE=4 SV=1	2033.56	0	30	tr|W5FIH8|W5FIH8_WHEAT	9.44453e+06	8.49782e+06	7.58468e+06	1.02507e+07	8.97117e+06	0.129175	0.0568182	NA	NA	1.60747e+06	1.49342e+06	798770	1.38227e+06
tr|A0A0C4BIR6|A0A0C4BIR6_WHEAT	A0A0C4BIR6	NA	Uncharacterized protein OS=Triticum aestivum PE=4 SV=1	2379.29	0	26	tr|A0A0C4BIR6|A0A0C4BIR6_WHEAT	9.42713e+06	4.03218e+07	1.56762e+07	2.25706e+07	1.91234e+07	0.606515	0.113636	NA	NA	1.60479e+06	6.43325e+06	2.43885e+06	4.32234e+06
tr|A0A1D6CRK0|A0A1D6CRK0_WHEAT	A0A1D6CRK0	NA	Uncharacterized protein OS=Triticum aestivum PE=4 SV=1	2104.89	0	22	tr|A0A1D6CRK0|A0A1D6CRK0_WHEAT	1.22504e+07	1.39776e+07	1.16134e+07	1.52175e+07	1.3114e+07	0.123704	0.0460526	NA	NA	1.60478e+06	2.26113e+06	1.70846e+06	2.68079e+06
tr|A0A0C4BJJ6|A0A0C4BJJ6_WHEAT	A0A0C4BJJ6	NA	Uncharacterized protein OS=Triticum aestivum PE=4 SV=1	1931.54	0	30	tr|A0A0C4BJJ6|A0A0C4BJJ6_WHEAT	8.9927e+06	2.02826e+07	9.89927e+06	1.60663e+07	1.29828e+07	0.386533	0.115	NA	NA	1.60298e+06	3.68658e+06	1.81517e+06	2.19357e+06
tr|W5FWW5|W5FWW5_WHEAT	W5FWW5	NA	Uncharacterized protein OS=Triticum aestivum PE=4 SV=1	2911.14	0	34	tr|W5FWW5|W5FWW5_WHEAT	1.27393e+07	1.64885e+07	1.27457e+07	1.48356e+07	1.37907e+07	0.12784	0.0772727	NA	NA	1.59058e+06	1.58656e+06	2.44898e+06	2.73153e+06
tr|A0A1D5Y981|A0A1D5Y981_WHEAT	A0A1D5Y981	NA	Oleosin OS=Triticum aestivum PE=3 SV=1	160.55	0	2	tr|A0A1D5Y981|A0A1D5Y981_WHEAT	4.75432e+06	7.38975e+06	865486	556050	2.8099e+06	0.966981	0.0416667	NA	NA	1.58477e+06	2.46325e+06	288495	185350
tr|A0A1D5T1I6|A0A1D5T1I6_WHEAT	A0A1D5T1I6	NA	Uncharacterized protein OS=Triticum aestivum PE=4 SV=1	668.75	0	9	tr|A0A1D5T1I6|A0A1D5T1I6_WHEAT	6.18019e+06	6.70826e+06	2.29047e+06	3.29257e+06	4.73638e+06	0.46753	0.0833333	NA	NA	1.5845e+06	1.60358e+06	569332	913770
tr|W5FQG6|W5FQG6_WHEAT	W5FQG6	NA	40S ribosomal protein S26 OS=Triticum aestivum PE=3 SV=1	203.12	0	1	tr|W5FQG6|W5FQG6_WHEAT	1.57397e+06	1.81369e+06	180689	170183	877327	0.943794	0.0833333	NA	NA	1.57397e+06	1.81369e+06	180689	170183
tr|A0A1D6CVN2|A0A1D6CVN2_WHEAT	A0A1D6CVN2	NA	Polyadenylate-binding protein OS=Triticum aestivum PE=3 SV=1	1217.89	0	19	tr|A0A1D6CVN2|A0A1D6CVN2_WHEAT	7.53998e+06	3.36881e+06	1.92906e+06	1.50213e+06	2.64893e+06	0.768464	0.0833333	NA	NA	1.56601e+06	729733	459924	351530
tr|W5FYY5|W5FYY5_WHEAT	W5FYY5	NA	Uncharacterized protein OS=Triticum aestivum PE=3 SV=1	1606.48	0	17	tr|W5FYY5|W5FYY5_WHEAT	1.17907e+07	9.44173e+06	1.24093e+07	1.2954e+07	1.21e+07	0.132742	0.0454545	NA	NA	1.5514e+06	1.3118e+06	2.33424e+06	2.5345e+06
tr|A0A1D5XNJ5|A0A1D5XNJ5_WHEAT	A0A1D5XNJ5	NA	Uncharacterized protein OS=Triticum aestivum PE=4 SV=1	823.77	0	12	tr|A0A1D5XNJ5|A0A1D5XNJ5_WHEAT	7.24142e+06	5.61313e+06	3.49936e+06	6.90571e+06	6.25942e+06	0.291631	0.0882353	NA	NA	1.53429e+06	1.30924e+06	908843	1.90268e+06
tr|A0A1D5T695|A0A1D5T695_WHEAT	A0A1D5T695	NA	Uncharacterized protein OS=Triticum aestivum PE=3 SV=1	2277.66	0	17	tr|A0A1D5T695|A0A1D5T695_WHEAT	1.26402e+07	3.41139e+07	1.52951e+07	1.99585e+07	1.76268e+07	0.466568	0.0833333	NA	NA	1.52402e+06	5.61885e+06	2.82396e+06	4.41379e+06
tr|Q8L806|Q8L806_WHEAT	Q8L806	NA	Putative ribosomal protein S18 OS=Triticum aestivum PE=1 SV=1	1315.65	0	15	tr|Q8L806|Q8L806_WHEAT	7.16572e+06	7.23301e+06	2.0816e+07	1.45784e+07	1.09057e+07	0.528122	0.0431034	NA	NA	1.50705e+06	1.59354e+06	4.40928e+06	3.25654e+06
Biognosys|iRT	NA	NA	Kit Fusion	986.98	0	11	Biognosys|iRT	9.95721e+06	1.34748e+07	1.53741e+08	4.80175e+07	3.07461e+07	1.19354	0.0441176	NA	NA	1.50116e+06	1.9305e+06	2.54685e+07	8.10562e+06
tr|A0A1D5UV98|A0A1D5UV98_WHEAT	A0A1D5UV98	NA	Pyruvate kinase OS=Triticum aestivum PE=3 SV=1	2458.58	0	27	tr|A0A1D5UV98|A0A1D5UV98_WHEAT	1.29924e+07	1.10791e+07	6.62357e+06	1.06346e+07	1.08568e+07	0.258973	0.141304	NA	NA	1.49996e+06	1.36391e+06	839879	1.27692e+06
tr|A0A1D5STJ3|A0A1D5STJ3_WHEAT	A0A1D5STJ3	NA	Uncharacterized protein OS=Triticum aestivum PE=4 SV=1	484.13	0	6	tr|A0A1D5STJ3|A0A1D5STJ3_WHEAT	5.49783e+06	5.63751e+06	2.90197e+06	2.94737e+06	4.2226e+06	0.359645	0.159091	NA	NA	1.49725e+06	1.38992e+06	819449	896192
tr|A0A1D5T7I0|A0A1D5T7I0_WHEAT	A0A1D5T7I0	NA	Uncharacterized protein OS=Triticum aestivum PE=3 SV=1	2031.05	0	23	tr|A0A1D5T7I0|A0A1D5T7I0_WHEAT	9.77449e+06	7.95337e+06	1.36373e+07	1.33899e+07	1.15822e+07	0.249121	0.0487805	NA	NA	1.4906e+06	1.32404e+06	2.28767e+06	2.60652e+06
tr|A0A1D5ZIA7|A0A1D5ZIA7_WHEAT	A0A1D5ZIA7	NA	Uncharacterized protein OS=Triticum aestivum PE=4 SV=1	421.05	0	5	tr|A0A1D5ZIA7|A0A1D5ZIA7_WHEAT	4.9695e+06	3.61427e+06	3.63465e+06	3.4133e+06	3.62446e+06	0.182892	0	NA	NA	1.48093e+06	1.10878e+06	1.11557e+06	963342
tr|A0A1D5VHJ6|A0A1D5VHJ6_WHEAT	A0A1D5VHJ6	NA	Uncharacterized protein OS=Triticum aestivum PE=3 SV=1	1299.22	0	16	tr|A0A1D5VHJ6|A0A1D5VHJ6_WHEAT	6.59659e+06	5.17562e+06	9.10227e+06	5.5586e+06	6.07759e+06	0.2675	0.137097	NA	NA	1.46456e+06	1.01573e+06	1.78048e+06	1.04185e+06
tr|A0A1D5WNC9|A0A1D5WNC9_WHEAT	A0A1D5WNC9	NA	Tubulin beta chain OS=Triticum aestivum PE=3 SV=1	417.26	0	4	tr|A0A1D5WNC9|A0A1D5WNC9_WHEAT	4.68669e+06	5.26125e+06	1.05274e+06	1.53526e+06	3.11098e+06	0.684941	0.0625	NA	NA	1.46352e+06	1.69356e+06	339545	484073
tr|A0A1D5XG59|A0A1D5XG59_WHEAT	A0A1D5XG59	NA	Uncharacterized protein OS=Triticum aestivum PE=4 SV=1	1040.98	0	9	tr|A0A1D5XG59|A0A1D5XG59_WHEAT	5.77545e+06	2.94193e+06	3.41623e+06	4.7717e+06	4.09396e+06	0.305561	0.15	NA	NA	1.45056e+06	780213	728512	1.02558e+06
tr|A0A1D5Z614|A0A1D5Z614_WHEAT	A0A1D5Z614	NA	Tubulin alpha chain OS=Triticum aestivum PE=3 SV=1	581.55	0	5	tr|A0A1D5Z614|A0A1D5Z614_WHEAT	4.76678e+06	2.91757e+06	4.97203e+06	8.53446e+06	4.86941e+06	0.44308	0.125	NA	NA	1.43248e+06	843315	1.41219e+06	2.67413e+06
tr|A0A1D5URY0|A0A1D5URY0_WHEAT	A0A1D5URY0	NA	Uncharacterized protein OS=Triticum aestivum PE=4 SV=1	1096.8	0	9	tr|A0A1D5URY0|A0A1D5URY0_WHEAT	5.33736e+06	6.44127e+06	6.74864e+06	6.35744e+06	6.39936e+06	0.0984932	0.0714286	NA	NA	1.40885e+06	1.53623e+06	1.67563e+06	1.38356e+06
tr|A0A0C4BK42|A0A0C4BK42_WHEAT	A0A0C4BK42	NA	Ribosomal protein L37 OS=Triticum aestivum PE=3 SV=1	664.08	0	11	tr|A0A0C4BK42|A0A0C4BK42_WHEAT	6.18725e+06	1.05183e+07	7.40102e+06	7.58572e+06	7.49337e+06	0.231981	0.0588235	NA	NA	1.40433e+06	2.28873e+06	1.82599e+06	1.95029e+06
tr|A0A1D5TG13|A0A1D5TG13_WHEAT	A0A1D5TG13	NA	Uncharacterized protein OS=Triticum aestivum PE=4 SV=1	1591.06	0	20	tr|A0A1D5TG13|A0A1D5TG13_WHEAT	9.0334e+06	7.52032e+06	7.62777e+06	7.73102e+06	7.6794e+06	0.0888371	0.125	NA	NA	1.40018e+06	1.46014e+06	1.63717e+06	1.52366e+06
tr|A0A1D5T787|A0A1D5T787_WHEAT	A0A1D5T787	NA	Uncharacterized protein OS=Triticum aestivum PE=3 SV=1	1672.96	0	23	tr|A0A1D5T787|A0A1D5T787_WHEAT	9.29962e+06	2.13925e+07	1.85274e+07	2.54246e+07	1.99599e+07	0.367196	0.158537	NA	NA	1.39881e+06	4.46532e+06	3.46885e+06	4.10737e+06
tr|A0A1D6CVU2|A0A1D6CVU2_WHEAT	A0A1D6CVU2	NA	Uncharacterized protein OS=Triticum aestivum PE=4 SV=1	67.01	0.00602107	1	tr|A0A1D6CVU2|A0A1D6CVU2_WHEAT	1.39642e+06	1.54436e+06	2.20473e+06	2.50312e+06	1.87454e+06	0.276086	0	NA	NA	1.39642e+06	1.54436e+06	2.20473e+06	2.50312e+06
tr|A0A1D5UU14|A0A1D5UU14_WHEAT	A0A1D5UU14	NA	Uncharacterized protein OS=Triticum aestivum PE=4 SV=1	1359.67	0	12	tr|A0A1D5UU14|A0A1D5UU14_WHEAT	7.6507e+06	7.75044e+06	5.11549e+06	6.66017e+06	7.15543e+06	0.179943	0.0454545	NA	NA	1.39406e+06	1.45211e+06	1.12167e+06	1.21524e+06
tr|W4ZS35|W4ZS35_WHEAT	W4ZS35	NA	Uncharacterized protein OS=Triticum aestivum PE=3 SV=1	2969.87	0	42	tr|W4ZS35|W4ZS35_WHEAT	1.17404e+07	6.87742e+06	6.04411e+06	6.46487e+06	6.67114e+06	0.341954	0.15	NA	NA	1.38174e+06	778341	1.02424e+06	953164
tr|A0A1D6RIC3|A0A1D6RIC3_WHEAT	A0A1D6RIC3	NA	Uncharacterized protein OS=Triticum aestivum PE=3 SV=1	501.11	0	6	tr|A0A1D6RIC3|A0A1D6RIC3_WHEAT	5.51984e+06	4.95683e+06	1.66347e+06	1.86706e+06	3.41194e+06	0.576852	0.0416667	NA	NA	1.37456e+06	1.42189e+06	451818	543170
tr|G0Z6F1|G0Z6F1_WHEAT	G0Z6F1	TRAES_3BF102700120CFD_c1	26s proteasome non-ATPase regulatory subunit OS=Triticum aestivum GN=TRAES_3BF102700120CFD_c1 PE=2 SV=1	1860.74	0	23	tr|G0Z6F1|G0Z6F1_WHEAT	8.71687e+06	8.66596e+06	5.35053e+06	1.05019e+07	8.69141e+06	0.258645	0.075	NA	NA	1.36241e+06	1.57996e+06	742662	1.76446e+06
tr|W5H631|W5H631_WHEAT	W5H631	NA	60S ribosomal protein L27 OS=Triticum aestivum PE=3 SV=1	866.62	0	13	tr|W5H631|W5H631_WHEAT	5.60721e+06	1.59068e+07	1.5759e+07	2.19024e+07	1.58329e+07	0.456953	0.075	NA	NA	1.35723e+06	3.83274e+06	4.78003e+06	6.72428e+06
tr|W5B525|W5B525_WHEAT	W5B525	NA	Uncharacterized protein OS=Triticum aestivum PE=3 SV=1	524.09	0	5	tr|W5B525|W5B525_WHEAT	4.17369e+06	7.09436e+06	1.55502e+06	2.16966e+06	3.17167e+06	0.665738	0.136364	NA	NA	1.35371e+06	2.35598e+06	487177	630276
tr|W5AP21|W5AP21_WHEAT	W5AP21	NA	Uncharacterized protein OS=Triticum aestivum PE=4 SV=1	594.13	0	7	tr|W5AP21|W5AP21_WHEAT	4.84895e+06	4.99269e+06	3.39065e+06	3.69419e+06	4.27157e+06	0.190836	0.0625	NA	NA	1.35264e+06	1.44339e+06	810574	1.04472e+06
tr|A0A1D5WJF1|A0A1D5WJF1_WHEAT	A0A1D5WJF1	NA	Uncharacterized protein OS=Triticum aestivum PE=4 SV=1	777.87	0	12	tr|A0A1D5WJF1|A0A1D5WJF1_WHEAT	5.21176e+06	4.33377e+06	6.437e+06	8.58191e+06	5.82438e+06	0.299892	0.1	NA	NA	1.34199e+06	1.12141e+06	1.75373e+06	2.31791e+06
tr|A0A1D5SCJ1|A0A1D5SCJ1_WHEAT	A0A1D5SCJ1	NA	ATP synthase subunit beta OS=Triticum aestivum PE=3 SV=1	2538.87	0	24	tr|A0A1D5SCJ1|A0A1D5SCJ1_WHEAT	9.43114e+06	7.03164e+06	1.01811e+07	1.1151e+07	9.80612e+06	0.186107	0.0595238	NA	NA	1.33581e+06	987729	1.12158e+06	1.57669e+06
tr|A0A1D5VK49|A0A1D5VK49_WHEAT	A0A1D5VK49	NA	Uncharacterized protein OS=Triticum aestivum PE=3 SV=1	77.88	0.00319659	1	tr|A0A1D5VK49|A0A1D5VK49_WHEAT	1.33238e+06	1.54289e+06	2.33267e+06	2.48878e+06	1.93778e+06	0.297223	0	NA	NA	1.33238e+06	1.54289e+06	2.33267e+06	2.48878e+06
tr|A0A1D6CG01|A0A1D6CG01_WHEAT	A0A1D6CG01	NA	Uncharacterized protein OS=Triticum aestivum PE=4 SV=1	408.77	0	7	tr|A0A1D6CG01|A0A1D6CG01_WHEAT	4.64546e+06	1.90214e+06	2.38398e+06	2.03188e+06	2.20793e+06	0.469176	0.0625	NA	NA	1.32792e+06	557854	713600	570224
tr|W5I1R7|W5I1R7_WHEAT	W5I1R7	NA	Uncharacterized protein OS=Triticum aestivum PE=3 SV=1	1734.25	0	24	tr|W5I1R7|W5I1R7_WHEAT	8.57182e+06	6.27034e+06	1.57089e+07	2.371e+07	1.21404e+07	0.579924	0.0743243	NA	NA	1.30466e+06	1.11969e+06	2.94034e+06	5.35668e+06
tr|W5DWX5|W5DWX5_WHEAT	W5DWX5	NA	Uncharacterized protein OS=Triticum aestivum PE=4 SV=1	3153.35	0	39	tr|W5DWX5|W5DWX5_WHEAT	1.09436e+07	1.381e+07	1.35065e+07	1.63008e+07	1.36582e+07	0.160604	0.123077	NA	NA	1.29442e+06	1.47458e+06	1.2259e+06	1.5661e+06
tr|A0A1D6RKP5|A0A1D6RKP5_WHEAT	A0A1D6RKP5	NA	Uncharacterized protein OS=Triticum aestivum PE=4 SV=1	1839.77	0	26	tr|A0A1D6RKP5|A0A1D6RKP5_WHEAT	1.04229e+07	1.30436e+07	5.18425e+06	6.02054e+06	8.22173e+06	0.42843	0.15	NA	NA	1.29316e+06	1.66826e+06	611357	710606
tr|A0A1D6DKR9|A0A1D6DKR9_WHEAT	A0A1D6DKR9	NA	Uncharacterized protein OS=Triticum aestivum PE=4 SV=1	1879.9	0	26	tr|A0A1D6DKR9|A0A1D6DKR9_WHEAT	9.15563e+06	6.69078e+06	5.34611e+06	6.55649e+06	6.62364e+06	0.230318	0.0625	NA	NA	1.28768e+06	1.15928e+06	897606	1.28567e+06
tr|A0A1D5X6M9|A0A1D5X6M9_WHEAT	A0A1D5X6M9	NA	Uncharacterized protein OS=Triticum aestivum PE=4 SV=1	4483.12	0	46	tr|A0A1D5X6M9|A0A1D5X6M9_WHEAT	1.47071e+07	1.43769e+07	1.64256e+07	1.9283e+07	1.55663e+07	0.138541	0.0735294	NA	NA	1.2742e+06	1.47647e+06	2.55263e+06	2.33295e+06
tr|A0A1D6AX77|A0A1D6AX77_WHEAT	A0A1D6AX77	NA	Uncharacterized protein OS=Triticum aestivum PE=4 SV=1	1939.86	0	22	tr|A0A1D6AX77|A0A1D6AX77_WHEAT	7.57445e+06	7.62177e+06	5.50378e+06	9.52653e+06	7.59811e+06	0.217437	0.118421	NA	NA	1.2447e+06	1.40673e+06	760567	1.7361e+06
tr|A0A1D6BAM8|A0A1D6BAM8_WHEAT	A0A1D6BAM8	NA	Uncharacterized protein OS=Triticum aestivum PE=4 SV=1	1789.55	0	22	tr|A0A1D6BAM8|A0A1D6BAM8_WHEAT	1.08568e+07	1.02294e+07	5.10124e+06	8.38226e+06	9.30581e+06	0.298978	0.0546875	NA	NA	1.23547e+06	1.45685e+06	641565	1.2592e+06
tr|W5D739|W5D739_WHEAT	W5D739	TRAES_3BF073700020CFD_c1	Uncharacterized protein OS=Triticum aestivum GN=TRAES_3BF073700020CFD_c1 PE=3 SV=1	108.8	0.00186104	1	tr|W5D739|W5D739_WHEAT	1.21722e+06	3.75277e+06	2.59261e+06	4.7672e+06	3.17269e+06	0.495795	0	NA	NA	1.21722e+06	3.75277e+06	2.59261e+06	4.7672e+06
tr|A0A077RQH1|A0A077RQH1_WHEAT	A0A077RQH1	TRAES_3BF066700090CFD_c1	Uncharacterized protein OS=Triticum aestivum GN=TRAES_3BF066700090CFD_c1 PE=3 SV=1	79	0.00322234	1	tr|A0A077RQH1|A0A077RQH1_WHEAT	1.2043e+06	3839.87	4107.12	15.42	3973.49	1.98249	0.25	NA	NA	1.2043e+06	3839.87	4107.12	15.42
tr|W5GG30|W5GG30_WHEAT	W5GG30	NA	Uncharacterized protein OS=Triticum aestivum PE=3 SV=1	3233.88	0	29	tr|W5GG30|W5GG30_WHEAT	1.03163e+07	7.46235e+06	7.27091e+06	1.00046e+07	8.73345e+06	0.184844	0.0932203	NA	NA	1.19419e+06	872165	806928	1.42777e+06
tr|A0A1D5XDB0|A0A1D5XDB0_WHEAT	A0A1D5XDB0	NA	Uncharacterized protein OS=Triticum aestivum PE=3 SV=1	2049.98	0	26	tr|A0A1D5XDB0|A0A1D5XDB0_WHEAT	7.61817e+06	8.29821e+06	7.28125e+06	9.59433e+06	7.95819e+06	0.124724	0.097561	NA	NA	1.19345e+06	1.28943e+06	1.21264e+06	1.79951e+06
tr|A0A1D6DIR3|A0A1D6DIR3_WHEAT	A0A1D6DIR3	NA	Uncharacterized protein OS=Triticum aestivum PE=4 SV=1	61.65	0.00773694	1	tr|A0A1D6DIR3|A0A1D6DIR3_WHEAT	1.19022e+06	910946	198626	280941	595943	0.748577	0	NA	NA	1.19022e+06	910946	198626	280941
sp|Q9ZRA9|TBB4_WHEAT	Q9ZRA9	TUBB4	Tubulin beta-4 chain OS=Triticum aestivum GN=TUBB4 PE=2 SV=1	804.75	0	8	sp|Q9ZRA9|TBB4_WHEAT	4.45693e+06	3.35699e+06	1.19606e+06	2.47885e+06	2.91792e+06	0.480355	0.0535714	NA	NA	1.18971e+06	978857	316806	758893
tr|A0A1D5X2M5|A0A1D5X2M5_WHEAT	A0A1D5X2M5	NA	Uncharacterized protein OS=Triticum aestivum PE=3 SV=1	2110.77	0	20	tr|A0A1D5X2M5|A0A1D5X2M5_WHEAT	9.93566e+06	1.19968e+07	1.24895e+07	1.68273e+07	1.22431e+07	0.226051	0.0320513	NA	NA	1.18927e+06	1.43962e+06	2.14958e+06	2.60642e+06
tr|A0A1D6A7Z4|A0A1D6A7Z4_WHEAT	A0A1D6A7Z4	NA	Uncharacterized protein OS=Triticum aestivum PE=4 SV=1	1051.43	0	15	tr|A0A1D6A7Z4|A0A1D6A7Z4_WHEAT	5.40248e+06	6.07399e+06	2.62728e+06	5.00258e+06	5.20253e+06	0.313929	0.0833333	NA	NA	1.18165e+06	1.30987e+06	576405	1.1441e+06
tr|A0A1D6BR45|A0A1D6BR45_WHEAT	A0A1D6BR45	NA	40S ribosomal protein S24 OS=Triticum aestivum PE=3 SV=1	1047.21	0	11	tr|A0A1D6BR45|A0A1D6BR45_WHEAT	4.86682e+06	3.59403e+06	9.17888e+06	1.24759e+07	7.02285e+06	0.540965	0.0681818	NA	NA	1.17958e+06	823783	2.40084e+06	3.43736e+06
tr|A0A1D5SRX8|A0A1D5SRX8_WHEAT	A0A1D5SRX8	NA	60S ribosomal protein L18a OS=Triticum aestivum PE=3 SV=1	2549.07	0	29	tr|A0A1D5SRX8|A0A1D5SRX8_WHEAT	9.12629e+06	3.17976e+07	2.04923e+07	2.53623e+07	2.29273e+07	0.441265	0.150862	NA	NA	1.14187e+06	4.27435e+06	3.18927e+06	4.28273e+06
tr|Q5I7L2|Q5I7L2_WHEAT	Q5I7L2	NA	Ribosomal protein L11 OS=Triticum aestivum PE=1 SV=1	1657.42	0	22	tr|Q5I7L2|Q5I7L2_WHEAT	5.03123e+06	1.38912e+07	1.40032e+07	2.28274e+07	1.39472e+07	0.521257	0.147727	NA	NA	1.12925e+06	2.94646e+06	2.46805e+06	5.34002e+06
tr|A0A1D6ARY3|A0A1D6ARY3_WHEAT	A0A1D6ARY3	NA	Uncharacterized protein OS=Triticum aestivum PE=4 SV=1	4161.42	0	49	tr|A0A1D6ARY3|A0A1D6ARY3_WHEAT	1.36838e+07	1.636e+07	1.92372e+07	2.14739e+07	1.77986e+07	0.191799	0.0852273	NA	NA	1.11684e+06	1.93589e+06	1.97278e+06	2.36157e+06
tr|A0A1D6RNS9|A0A1D6RNS9_WHEAT	A0A1D6RNS9	NA	Uncharacterized protein OS=Triticum aestivum PE=3 SV=1	1158.59	0	16	tr|A0A1D6RNS9|A0A1D6RNS9_WHEAT	5.86337e+06	3.76197e+06	1.0781e+07	1.02314e+07	8.04739e+06	0.444507	0.0862069	NA	NA	1.10393e+06	795931	2.44798e+06	2.10912e+06
tr|A0A1D5YH13|A0A1D5YH13_WHEAT	A0A1D5YH13	NA	Uncharacterized protein OS=Triticum aestivum PE=3 SV=1	2087.6	0	19	tr|A0A1D5YH13|A0A1D5YH13_WHEAT	8.33582e+06	1.24142e+07	6.97033e+06	8.59053e+06	8.46317e+06	0.257257	0.132812	NA	NA	1.10251e+06	1.78943e+06	1.68212e+06	2.00224e+06
tr|W5GVR2|W5GVR2_WHEAT	W5GVR2	NA	Uncharacterized protein OS=Triticum aestivum PE=4 SV=1	3367.5	0	33	tr|W5GVR2|W5GVR2_WHEAT	9.91001e+06	4.38536e+07	5.33795e+07	4.8494e+07	4.61738e+07	0.506825	0.126712	NA	NA	1.09828e+06	5.16935e+06	7.63973e+06	6.47439e+06
tr|A0A1D5X8E0|A0A1D5X8E0_WHEAT	A0A1D5X8E0	NA	Uncharacterized protein OS=Triticum aestivum PE=4 SV=1	32.19	0	1	tr|A0A1D5X8E0|A0A1D5X8E0_WHEAT	1.08633e+06	10500.3	662256	827369	744813	0.709213	0	NA	NA	1.08633e+06	10500.3	662256	827369
tr|A0A1D5Z709|A0A1D5Z709_WHEAT	A0A1D5Z709	NA	Uncharacterized protein OS=Triticum aestivum PE=4 SV=1	2720.48	0	37	tr|A0A1D5Z709|A0A1D5Z709_WHEAT	9.13226e+06	7.83753e+06	8.91648e+06	8.90579e+06	8.91113e+06	0.0670343	0.0625	NA	NA	1.07771e+06	1.14905e+06	1.20366e+06	1.01022e+06
tr|W5HTZ1|W5HTZ1_WHEAT	W5HTZ1	NA	Uncharacterized protein OS=Triticum aestivum PE=3 SV=1	454.43	0	9	tr|W5HTZ1|W5HTZ1_WHEAT	3.3627e+06	5.05582e+06	1.38542e+07	9.42435e+06	7.24009e+06	0.59392	0.0227273	NA	NA	1.07703e+06	1.44527e+06	4.50434e+06	3.01416e+06
tr|W5AMS6|W5AMS6_WHEAT	W5AMS6	NA	Importin subunit alpha OS=Triticum aestivum PE=3 SV=1	62.41	0.00730638	1	tr|W5AMS6|W5AMS6_WHEAT	1.06988e+06	1.00435e+06	34658.1	36457.5	520402	1.0793	0	NA	NA	1.06988e+06	1.00435e+06	34658.1	36457.5
sp|P26913|NLTPB_WHEAT	P26913	NA	Probable non-specific lipid-transfer protein (Fragment) OS=Triticum aestivum PE=1 SV=1	252.96	0	1	sp|P26913|NLTPB_WHEAT	2.1308e+06	2.11995e+06	68676	114189	1.11707e+06	1.05959	0	NA	NA	1.0654e+06	1.05998e+06	34338	57094.7
tr|W5DVY5|W5DVY5_WHEAT	W5DVY5	NA	Uncharacterized protein OS=Triticum aestivum PE=4 SV=1	1674.71	0	21	tr|W5DVY5|W5DVY5_WHEAT	6.27019e+06	5.16227e+06	5.68849e+06	4.74061e+06	5.42538e+06	0.121123	0.114286	NA	NA	1.04574e+06	854680	898382	806906
tr|A0A1D5XM30|A0A1D5XM30_WHEAT	A0A1D5XM30	NA	Uncharacterized protein OS=Triticum aestivum PE=4 SV=1	993.08	0	10	tr|A0A1D5XM30|A0A1D5XM30_WHEAT	4.46933e+06	4.93317e+06	3.42895e+06	3.53193e+06	4.00063e+06	0.178701	0.125	NA	NA	1.04414e+06	1.10289e+06	967432	967477
tr|A0A1D5Y3Q3|A0A1D5Y3Q3_WHEAT	A0A1D5Y3Q3	NA	Uncharacterized protein OS=Triticum aestivum PE=3 SV=1	1666.63	0	28	tr|A0A1D5Y3Q3|A0A1D5Y3Q3_WHEAT	4.6105e+06	5.63736e+06	4.1474e+06	3.14832e+06	4.37895e+06	0.235669	0.0714286	NA	NA	1.04162e+06	1.21148e+06	952921	481999
tr|A0A1D5SUT9|A0A1D5SUT9_WHEAT	A0A1D5SUT9	NA	Uncharacterized protein OS=Triticum aestivum PE=3 SV=1	230.47	0	3	tr|A0A1D5SUT9|A0A1D5SUT9_WHEAT	3.11843e+06	2.8091e+06	1.65905e+06	2.05676e+06	2.43293e+06	0.278237	0.375	NA	NA	1.03948e+06	936368	553017	685588
tr|A0A1D5TUC1|A0A1D5TUC1_WHEAT	A0A1D5TUC1	NA	Uncharacterized protein OS=Triticum aestivum PE=4 SV=1	170.49	0	1	tr|A0A1D5TUC1|A0A1D5TUC1_WHEAT	2.07882e+06	1.87155e+06	1.68565e+06	2.67457e+06	1.97519e+06	0.206544	0.166667	NA	NA	1.03941e+06	935775	842827	1.33728e+06
tr|W5A031|W5A031_WHEAT	W5A031	NA	Uncharacterized protein OS=Triticum aestivum PE=4 SV=1	806.02	0	9	tr|W5A031|W5A031_WHEAT	3.73957e+06	9.21136e+06	2.15351e+06	3.89148e+06	3.81552e+06	0.647925	0.078125	NA	NA	1.03668e+06	2.61561e+06	456860	873268
tr|A0A1D6S6G2|A0A1D6S6G2_WHEAT	A0A1D6S6G2	NA	Uncharacterized protein OS=Triticum aestivum PE=3 SV=1	1750.1	0	25	tr|A0A1D6S6G2|A0A1D6S6G2_WHEAT	5.97353e+06	4.8776e+06	2.28139e+07	2.71141e+07	1.43937e+07	0.751908	0.06875	NA	NA	1.02814e+06	738227	4.22434e+06	5.35652e+06
tr|A0A1D5SD46|A0A1D5SD46_WHEAT	A0A1D5SD46	NA	Uncharacterized protein OS=Triticum aestivum PE=4 SV=1	1198.02	0	13	tr|A0A1D5SD46|A0A1D5SD46_WHEAT	5.29764e+06	5.77753e+06	7.31365e+06	8.18538e+06	6.54559e+06	0.201717	0.134615	NA	NA	1.01717e+06	950518	1.5152e+06	1.73241e+06
tr|A0A1D6RRV5|A0A1D6RRV5_WHEAT	A0A1D6RRV5	NA	Uncharacterized protein OS=Triticum aestivum PE=4 SV=1	667.44	0	5	tr|A0A1D6RRV5|A0A1D6RRV5_WHEAT	3.43584e+06	2.79273e+06	3.83285e+06	4.5603e+06	3.63434e+06	0.202436	0.1875	NA	NA	1.00407e+06	860611	1.11311e+06	1.34776e+06
tr|W5DZ58|W5DZ58_WHEAT	W5DZ58	NA	Coatomer subunit gamma OS=Triticum aestivum PE=3 SV=1	2697.12	0	36	tr|W5DZ58|W5DZ58_WHEAT	9.67328e+06	8.94712e+06	6.72124e+06	9.94574e+06	9.3102e+06	0.165776	0.0954545	NA	NA	1.0004e+06	1.09705e+06	570200	1.00754e+06
tr|A0A1D6C999|A0A1D6C999_WHEAT	A0A1D6C999	NA	Glyceraldehyde-3-phosphate dehydrogenase OS=Triticum aestivum PE=3 SV=1	1731.84	0	18	tr|A0A1D6C999|A0A1D6C999_WHEAT	6.08472e+06	6.58083e+06	3.76577e+06	5.82511e+06	5.95492e+06	0.222715	0.120968	NA	NA	998094	1.22251e+06	534693	765115
tr|A0A1D5XGH9|A0A1D5XGH9_WHEAT	A0A1D5XGH9	NA	Uncharacterized protein OS=Triticum aestivum PE=3 SV=1	103.11	0.00181488	1	tr|A0A1D5XGH9|A0A1D5XGH9_WHEAT	990734	861185	165576	168359	514772	0.807714	0	NA	NA	990734	861185	165576	168359
tr|A0A1D6D7Z9|A0A1D6D7Z9_WHEAT	A0A1D6D7Z9	NA	Uncharacterized protein OS=Triticum aestivum PE=4 SV=1	722.14	0	13	tr|A0A1D6D7Z9|A0A1D6D7Z9_WHEAT	5.07762e+06	4.21112e+06	2.80978e+06	4.02783e+06	4.11947e+06	0.231766	0.0714286	NA	NA	986993	894088	582277	1.15965e+06
tr|Q332Q2|Q332Q2_WHEAT	Q332Q2	rps3	Rps3 protein OS=Triticum aestivum GN=rps3 PE=3 SV=1	99.89	0.00179104	2	tr|Q332Q2|Q332Q2_WHEAT	1.97339e+06	1.49565e+06	4.20255e+06	2.19869e+06	2.08604e+06	0.48356	0	NA	NA	986694	747824	2.10128e+06	1.09935e+06
tr|A0A1D5WX80|A0A1D5WX80_WHEAT	A0A1D5WX80	NA	Peroxidase OS=Triticum aestivum PE=3 SV=1	1570.55	0	22	tr|A0A1D5WX80|A0A1D5WX80_WHEAT	6.23039e+06	5.87562e+06	6.75486e+06	8.14368e+06	6.49262e+06	0.147552	0.0347222	NA	NA	982437	847130	706045	1.14591e+06
tr|A0A1D6CBE4|A0A1D6CBE4_WHEAT	A0A1D6CBE4	NA	Reticulon-like protein OS=Triticum aestivum PE=4 SV=1	649.64	0	8	tr|A0A1D6CBE4|A0A1D6CBE4_WHEAT	3.50601e+06	4.78887e+06	1.14303e+07	4.32601e+06	4.55744e+06	0.60711	0.133333	NA	NA	977607	1.29793e+06	3.36073e+06	1.26137e+06
tr|A0A1D5RVW0|A0A1D5RVW0_WHEAT	A0A1D5RVW0	NA	Uncharacterized protein OS=Triticum aestivum PE=4 SV=1	808.08	0	14	tr|A0A1D5RVW0|A0A1D5RVW0_WHEAT	3.57017e+06	3.72208e+06	3.22157e+06	5.52167e+06	3.64612e+06	0.256947	0.0526316	NA	NA	960223	937375	773561	1.26098e+06
tr|W5EAP3|W5EAP3_WHEAT	W5EAP3	NA	Ribosomal protein OS=Triticum aestivum PE=3 SV=1	2147.67	0	22	tr|W5EAP3|W5EAP3_WHEAT	5.55376e+06	2.48683e+07	1.70142e+07	2.69745e+07	2.09413e+07	0.521312	0.0988372	NA	NA	955415	4.52856e+06	3.75708e+06	5.72385e+06
tr|A0A1D6D8G2|A0A1D6D8G2_WHEAT	A0A1D6D8G2	NA	Uncharacterized protein OS=Triticum aestivum PE=4 SV=1	1406.1	0	16	tr|A0A1D6D8G2|A0A1D6D8G2_WHEAT	5.30611e+06	3.45448e+06	2.35502e+06	2.60309e+06	3.02878e+06	0.389725	0.107143	NA	NA	951976	687206	432189	559657
tr|A0A1D6C183|A0A1D6C183_WHEAT	A0A1D6C183	NA	Uncharacterized protein OS=Triticum aestivum PE=3 SV=1	403.79	0	2	tr|A0A1D6C183|A0A1D6C183_WHEAT	2.9036e+06	2.84029e+06	4.58713e+06	2.69795e+06	2.87194e+06	0.273469	0.181818	NA	NA	947220	910290	1.52439e+06	898907
tr|A0A1D6CS92|A0A1D6CS92_WHEAT	A0A1D6CS92	NA	Uncharacterized protein OS=Triticum aestivum PE=4 SV=1	1212.94	0	12	tr|A0A1D6CS92|A0A1D6CS92_WHEAT	5.10344e+06	5.60455e+06	2.73214e+06	5.29899e+06	5.20122e+06	0.281336	0.0681818	NA	NA	945148	1.16295e+06	362036	1.12129e+06
tr|A0A1D5UIU1|A0A1D5UIU1_WHEAT	A0A1D5UIU1	NA	Uncharacterized protein OS=Triticum aestivum PE=4 SV=1	2303.37	0	30	tr|A0A1D5UIU1|A0A1D5UIU1_WHEAT	6.32689e+06	6.20597e+06	7.09565e+06	9.69925e+06	6.71127e+06	0.221857	0.0397727	NA	NA	941483	1.08271e+06	1.37061e+06	1.74391e+06
tr|A0A1D5Y775|A0A1D5Y775_WHEAT	A0A1D5Y775	NA	Tubulin alpha chain OS=Triticum aestivum PE=3 SV=1	306.4	0	4	tr|A0A1D5Y775|A0A1D5Y775_WHEAT	3.04303e+06	1.6892e+06	1.56621e+06	1.75377e+06	1.72149e+06	0.343283	0	NA	NA	940435	505300	481981	522577
sp|Q6W8Q2|REHY_WHEAT	Q6W8Q2	PER1	1-Cys peroxiredoxin PER1 OS=Triticum aestivum GN=PER1 PE=2 SV=1	845.76	0	16	sp|Q6W8Q2|REHY_WHEAT	5.12605e+06	4.69202e+06	4.81956e+06	6.71654e+06	4.97281e+06	0.175431	0.0568182	NA	NA	937278	953859	1.01621e+06	1.25865e+06
tr|W5EF42|W5EF42_WHEAT	W5EF42	NA	Uncharacterized protein OS=Triticum aestivum PE=4 SV=1	509.88	0	6	tr|W5EF42|W5EF42_WHEAT	3.69887e+06	3.58507e+06	1.71569e+06	3.6204e+06	3.60273e+06	0.304508	0.0909091	NA	NA	937019	950665	411532	928153
tr|A0A1D6D433|A0A1D6D433_WHEAT	A0A1D6D433	NA	Uncharacterized protein OS=Triticum aestivum PE=4 SV=1	830.32	0	12	tr|A0A1D6D433|A0A1D6D433_WHEAT	3.9866e+06	4.65077e+06	1.80404e+06	3.07807e+06	3.53233e+06	0.364677	0.144737	NA	NA	932917	1.17767e+06	506109	862541
tr|A0A1D6C8H3|A0A1D6C8H3_WHEAT	A0A1D6C8H3	NA	Uncharacterized protein OS=Triticum aestivum PE=4 SV=1	1767.11	0	20	tr|A0A1D6C8H3|A0A1D6C8H3_WHEAT	6.34846e+06	5.69258e+06	5.12722e+06	6.19287e+06	5.94273e+06	0.0944503	0.0555556	NA	NA	931202	766387	687181	1.02555e+06
tr|A0A1D6RJV3|A0A1D6RJV3_WHEAT	A0A1D6RJV3	NA	Uncharacterized protein OS=Triticum aestivum PE=4 SV=1	2445.36	0	27	tr|A0A1D6RJV3|A0A1D6RJV3_WHEAT	8.84117e+06	9.0025e+06	3.734e+06	4.70299e+06	6.77208e+06	0.417787	0.0697674	NA	NA	926442	1.07448e+06	444588	415162
tr|A0A1D6S2S6|A0A1D6S2S6_WHEAT	A0A1D6S2S6	NA	Pyruvate kinase OS=Triticum aestivum PE=3 SV=1	1995.29	0	24	tr|A0A1D6S2S6|A0A1D6S2S6_WHEAT	6.50709e+06	5.93458e+06	5.05075e+06	7.01055e+06	6.22083e+06	0.137245	0.0795455	NA	NA	925701	719237	555741	735215
tr|A0A1D6CJI9|A0A1D6CJI9_WHEAT	A0A1D6CJI9	NA	Uncharacterized protein OS=Triticum aestivum PE=3 SV=1	366.41	0	5	tr|A0A1D6CJI9|A0A1D6CJI9_WHEAT	2.86467e+06	3.68153e+06	2.01141e+06	3.57748e+06	3.22108e+06	0.254546	0.03125	NA	NA	924591	1.20584e+06	636467	1.12603e+06
tr|A0A1D6RPK0|A0A1D6RPK0_WHEAT	A0A1D6RPK0	NA	Uncharacterized protein OS=Triticum aestivum PE=4 SV=1	90.55	0.00171233	2	tr|A0A1D6RPK0|A0A1D6RPK0_WHEAT	1.8345e+06	3.52301e+06	329900	226590	1.0822e+06	1.04733	0	NA	NA	917250	1.76151e+06	164950	113295
tr|I6QQ39|I6QQ39_WHEAT	I6QQ39	Glo-3A	Globulin-3A OS=Triticum aestivum GN=Glo-3A PE=2 SV=1	994.55	0	15	tr|I6QQ39|I6QQ39_WHEAT	4.28398e+06	7.60061e+06	1.07131e+07	1.05763e+07	9.08844e+06	0.365871	0.0689655	NA	NA	910813	1.7431e+06	2.42775e+06	2.10669e+06
tr|A0A1D5RTB0|A0A1D5RTB0_WHEAT	A0A1D5RTB0	NA	Amidophosphoribosyltransferase OS=Triticum aestivum PE=3 SV=1	1798.7	0	27	tr|A0A1D5RTB0|A0A1D5RTB0_WHEAT	6.53474e+06	7.24748e+06	3.49839e+06	4.63554e+06	5.58514e+06	0.313945	0.134615	NA	NA	906533	959006	610409	897337
tr|A0A1D5XFN6|A0A1D5XFN6_WHEAT	A0A1D5XFN6	NA	Uncharacterized protein OS=Triticum aestivum PE=3 SV=1	1483.1	0	14	tr|A0A1D5XFN6|A0A1D5XFN6_WHEAT	5.7107e+06	4.76955e+06	4.73563e+06	6.70703e+06	5.24012e+06	0.170434	0.114583	NA	NA	906351	634050	824082	1.26978e+06
sp|P02276|H2A2_WHEAT	P02276	NA	Histone H2A.2.1 OS=Triticum aestivum PE=1 SV=1	405.13	0	5	sp|P02276|H2A2_WHEAT	2.76768e+06	3.90309e+06	1.98815e+06	1.61236e+06	2.37792e+06	0.394069	0.03125	NA	NA	902479	1.27121e+06	648139	529429
tr|W5FEQ2|W5FEQ2_WHEAT	W5FEQ2	NA	Uncharacterized protein OS=Triticum aestivum PE=4 SV=1	1659	0	23	tr|W5FEQ2|W5FEQ2_WHEAT	5.17229e+06	5.87233e+06	8.18678e+06	5.15504e+06	5.52231e+06	0.23504	0.0454545	NA	NA	901286	923293	1.31197e+06	921499
tr|A0A1D5TRI4|A0A1D5TRI4_WHEAT	A0A1D5TRI4	NA	Tubulin alpha chain OS=Triticum aestivum PE=3 SV=1	363.75	0	2	tr|A0A1D5TRI4|A0A1D5TRI4_WHEAT	1.79531e+06	1.40563e+06	661707	1.25183e+06	1.32873e+06	0.368055	0.0625	NA	NA	897656	702813	330854	625917
tr|A0A1D5TPB6|A0A1D5TPB6_WHEAT	A0A1D5TPB6	NA	Ribosomal protein L19 OS=Triticum aestivum PE=3 SV=1	2239.39	0	22	tr|A0A1D5TPB6|A0A1D5TPB6_WHEAT	8.6361e+06	2.76974e+07	3.19444e+07	4.24488e+07	2.98209e+07	0.510447	0.146552	NA	NA	897452	3.52311e+06	5.32292e+06	7.95499e+06
tr|A0A1D5SB19|A0A1D5SB19_WHEAT	A0A1D5SB19	NA	Uncharacterized protein OS=Triticum aestivum PE=3 SV=1	125.58	0	1	tr|A0A1D5SB19|A0A1D5SB19_WHEAT	893635	329485	463046	429560	446303	0.472024	0	NA	NA	893635	329485	463046	429560
tr|A0A1D6RV01|A0A1D6RV01_WHEAT	A0A1D6RV01	NA	Uncharacterized protein OS=Triticum aestivum PE=4 SV=1	1602.76	0	22	tr|A0A1D6RV01|A0A1D6RV01_WHEAT	5.22258e+06	5.36921e+06	5.87764e+06	6.57727e+06	5.62342e+06	0.106203	0.138889	NA	NA	892220	930970	1.10888e+06	1.3186e+06
tr|A0A1D6RTJ4|A0A1D6RTJ4_WHEAT	A0A1D6RTJ4	NA	Uncharacterized protein OS=Triticum aestivum PE=3 SV=1	188.96	0	1	tr|A0A1D6RTJ4|A0A1D6RTJ4_WHEAT	887359	1.5106e+06	881593	848235	884476	0.309673	0	NA	NA	887359	1.5106e+06	881593	848235
tr|A0A1D5ST87|A0A1D5ST87_WHEAT	A0A1D5ST87	NA	Uncharacterized protein OS=Triticum aestivum PE=4 SV=1	658.46	0	8	tr|A0A1D5ST87|A0A1D5ST87_WHEAT	3.87155e+06	3.68392e+06	7.15764e+06	7.01893e+06	5.44524e+06	0.352239	0	NA	NA	882758	953986	1.79962e+06	1.84561e+06
tr|A0A1D5SC17|A0A1D5SC17_WHEAT	A0A1D5SC17	NA	Uncharacterized protein OS=Triticum aestivum PE=4 SV=1	661.27	0	12	tr|A0A1D5SC17|A0A1D5SC17_WHEAT	2.9772e+06	1.29219e+06	1.75157e+07	8.99942e+06	5.98831e+06	0.95306	0.107143	NA	NA	882287	247727	5.74281e+06	2.8814e+06
tr|A0A1D6BLA1|A0A1D6BLA1_WHEAT	A0A1D6BLA1	NA	Uncharacterized protein OS=Triticum aestivum PE=4 SV=1	573.13	0	4	tr|A0A1D6BLA1|A0A1D6BLA1_WHEAT	2.87447e+06	3.76508e+06	1.44989e+06	2.90892e+06	2.89169e+06	0.34893	0.0625	NA	NA	870523	1.09119e+06	464642	925913
tr|A0A1D6RVF1|A0A1D6RVF1_WHEAT	A0A1D6RVF1	NA	40S ribosomal protein S3a OS=Triticum aestivum PE=3 SV=1	63.87	0.00738189	1	tr|A0A1D6RVF1|A0A1D6RVF1_WHEAT	868789	555382	815256	877287	842022	0.194697	0	NA	NA	868789	555382	815256	877287
tr|A0A1D5SU51|A0A1D5SU51_WHEAT	A0A1D5SU51	NA	Uncharacterized protein OS=Triticum aestivum PE=4 SV=1	5293.03	0	49	tr|A0A1D5SU51|A0A1D5SU51_WHEAT	1.12878e+07	1.36199e+07	1.88244e+07	1.26377e+07	1.31288e+07	0.233907	0.0645161	NA	NA	867792	1.04191e+06	1.62826e+06	1.08847e+06
tr|A0A1D6AIH4|A0A1D6AIH4_WHEAT	A0A1D6AIH4	NA	Uncharacterized protein OS=Triticum aestivum PE=4 SV=1	1911.67	0	27	tr|A0A1D6AIH4|A0A1D6AIH4_WHEAT	6.99676e+06	7.4012e+06	6.28118e+06	6.40575e+06	6.70125e+06	0.0772789	0.0738636	NA	NA	853879	1.02146e+06	1.25619e+06	1.24611e+06
tr|W5HF14|W5HF14_WHEAT	W5HF14	NA	Uncharacterized protein OS=Triticum aestivum PE=4 SV=1	1380.77	0	12	tr|W5HF14|W5HF14_WHEAT	5.2781e+06	7.33455e+06	5.84792e+06	7.84004e+06	6.59123e+06	0.183933	0.0416667	NA	NA	849816	1.11269e+06	1.23171e+06	1.66283e+06
tr|A0A1D5XE21|A0A1D5XE21_WHEAT	A0A1D5XE21	NA	Phosphoserine aminotransferase OS=Triticum aestivum PE=3 SV=1	1621.97	0	18	tr|A0A1D5XE21|A0A1D5XE21_WHEAT	5.48395e+06	7.30385e+06	3.61089e+06	5.46792e+06	5.47594e+06	0.275799	0.133333	NA	NA	845730	1.13266e+06	502120	958408
tr|A0A1D5THS1|A0A1D5THS1_WHEAT	A0A1D5THS1	NA	Uncharacterized protein OS=Triticum aestivum PE=4 SV=1	843.45	0	14	tr|A0A1D5THS1|A0A1D5THS1_WHEAT	4.28398e+06	1.20634e+07	9.88741e+06	7.95805e+06	8.92273e+06	0.386116	0.0729167	NA	NA	842016	2.59401e+06	3.05077e+06	2.39539e+06
tr|Q5I7L1|Q5I7L1_WHEAT	Q5I7L1	NA	Ribosomal protein L13a OS=Triticum aestivum PE=1 SV=1	1279.54	0	17	tr|Q5I7L1|Q5I7L1_WHEAT	4.89528e+06	1.56598e+07	2.07526e+07	1.91294e+07	1.73946e+07	0.472092	0.0714286	NA	NA	833800	2.44334e+06	4.24824e+06	3.65743e+06
tr|A0A1D6C5F8|A0A1D6C5F8_WHEAT	A0A1D6C5F8	NA	Uncharacterized protein OS=Triticum aestivum PE=4 SV=1	1802.37	0	20	tr|A0A1D6C5F8|A0A1D6C5F8_WHEAT	5.07214e+06	6.27892e+06	2.46311e+06	3.28515e+06	4.17864e+06	0.403231	0.132812	NA	NA	831797	895912	341595	548737
tr|A0A1D6CA89|A0A1D6CA89_WHEAT	A0A1D6CA89	NA	Uncharacterized protein OS=Triticum aestivum PE=4 SV=1	77.57	0.00318979	1	tr|A0A1D6CA89|A0A1D6CA89_WHEAT	828648	775768	534370	971626	802208	0.234105	0	NA	NA	828648	775768	534370	971626
tr|W5B8D6|W5B8D6_WHEAT	W5B8D6	Clo1-B	Caleosin OS=Triticum aestivum GN=Clo1-B PE=2 SV=1	1411.76	0	10	tr|W5B8D6|W5B8D6_WHEAT	2.98037e+06	3.56172e+06	2.28981e+07	1.25713e+07	8.06651e+06	0.890946	0.0725806	NA	NA	818155	743489	4.86412e+06	2.38206e+06
tr|A0A1D5Z4Y3|A0A1D5Z4Y3_WHEAT	A0A1D5Z4Y3	NA	Uncharacterized protein OS=Triticum aestivum PE=4 SV=1	72.37	0.00570244	1	tr|A0A1D5Z4Y3|A0A1D5Z4Y3_WHEAT	808884	3.37585e+06	32172.1	23313.9	420528	1.49726	0	NA	NA	808884	3.37585e+06	32172.1	23313.9
tr|A0A1D6CDN7|A0A1D6CDN7_WHEAT	A0A1D6CDN7	NA	40S ribosomal protein S30 OS=Triticum aestivum PE=3 SV=1	473.87	0	7	tr|A0A1D6CDN7|A0A1D6CDN7_WHEAT	2.98585e+06	1.48687e+06	1.98247e+06	2.54515e+06	2.26381e+06	0.290586	0.159091	NA	NA	807624	460519	645604	828953
tr|A0A077RSE3|A0A077RSE3_WHEAT	A0A077RSE3	TRAES_3BF026900020CFD_c1	Pyruvate kinase OS=Triticum aestivum GN=TRAES_3BF026900020CFD_c1 PE=3 SV=1	138.55	0	2	tr|A0A077RSE3|A0A077RSE3_WHEAT	1.61486e+06	511497	319681	238009	415589	0.953169	0.0833333	NA	NA	807430	255749	159841	119004
tr|A0A1D5UCB6|A0A1D5UCB6_WHEAT	A0A1D5UCB6	NA	Xylose isomerase OS=Triticum aestivum PE=3 SV=1	2170.65	0	26	tr|A0A1D5UCB6|A0A1D5UCB6_WHEAT	7.02914e+06	9.17593e+06	7.27475e+06	7.84461e+06	7.55968e+06	0.122513	0.0510204	NA	NA	805510	1.25847e+06	734374	913586
tr|W5G112|W5G112_WHEAT	W5G112	NA	Uncharacterized protein OS=Triticum aestivum PE=3 SV=1	2608.56	0	29	tr|W5G112|W5G112_WHEAT	7.09683e+06	8.10389e+06	6.44073e+06	7.15764e+06	7.12724e+06	0.0950837	0.095	NA	NA	803900	942209	733393	1.06018e+06
tr|A0A1D6RYE2|A0A1D6RYE2_WHEAT	A0A1D6RYE2	NA	Uncharacterized protein OS=Triticum aestivum PE=4 SV=1	8468.26	0	107	tr|A0A1D6RYE2|A0A1D6RYE2_WHEAT	1.71452e+07	1.87121e+07	2.08249e+07	2.46702e+07	1.97685e+07	0.160189	0.111765	NA	NA	794503	880196	1.04289e+06	1.12302e+06
tr|Q2PCD1|Q2PCD1_WHEAT	Q2PCD1	ltp9.7c	Non-specific lipid-transfer protein OS=Triticum aestivum GN=ltp9.7c PE=3 SV=1	311.05	0	5	tr|Q2PCD1|Q2PCD1_WHEAT	2.75079e+06	2.522e+06	858210	835657	1.6901e+06	0.595637	0	NA	NA	792569	756353	276419	260152
tr|A0A096ULG3|A0A096ULG3_WHEAT	A0A096ULG3	NA	Uncharacterized protein OS=Triticum aestivum PE=4 SV=1	1760.34	0	26	tr|A0A096ULG3|A0A096ULG3_WHEAT	5.07919e+06	2.00518e+07	1.1251e+07	7.89805e+06	9.57454e+06	0.586955	0.0792683	NA	NA	782698	2.88498e+06	1.99694e+06	1.54147e+06
tr|Q5I7K5|Q5I7K5_WHEAT	Q5I7K5	NA	Ribosomal protein P1 OS=Triticum aestivum PE=1 SV=1	832.4	0	9	tr|Q5I7K5|Q5I7K5_WHEAT	3.05883e+06	1.40551e+07	5.94683e+06	6.24514e+06	6.09599e+06	0.642912	0.09375	NA	NA	782211	3.48368e+06	1.69504e+06	1.75386e+06
tr|A0A1D5UMV4|A0A1D5UMV4_WHEAT	A0A1D5UMV4	NA	Uncharacterized protein OS=Triticum aestivum PE=3 SV=1	285.24	0	3	tr|A0A1D5UMV4|A0A1D5UMV4_WHEAT	2.33621e+06	1.10617e+06	3.43301e+06	3.64703e+06	2.88461e+06	0.443726	0.0714286	NA	NA	778735	368723	1.14434e+06	1.21568e+06
tr|A0A1D6RPZ0|A0A1D6RPZ0_WHEAT	A0A1D6RPZ0	NA	Uncharacterized protein OS=Triticum aestivum PE=4 SV=1	1262.65	0	20	tr|A0A1D6RPZ0|A0A1D6RPZ0_WHEAT	3.34373e+06	2.34865e+06	2.74406e+06	3.52498e+06	3.0439e+06	0.18144	0.16129	NA	NA	776309	437432	691224	944903
tr|W5DWF2|W5DWF2_WHEAT	W5DWF2	NA	Uncharacterized protein OS=Triticum aestivum PE=3 SV=1	507.62	0	9	tr|W5DWF2|W5DWF2_WHEAT	2.87621e+06	3.19134e+06	1.63954e+06	2.23653e+06	2.55637e+06	0.277584	0.0714286	NA	NA	767989	955499	392391	616577
tr|A0A1D5YGL3|A0A1D5YGL3_WHEAT	A0A1D5YGL3	NA	40S ribosomal protein S26 OS=Triticum aestivum PE=3 SV=1	608.7	0	9	tr|A0A1D5YGL3|A0A1D5YGL3_WHEAT	3.92483e+06	3.44229e+06	3.74388e+06	4.79848e+06	3.83436e+06	0.146445	0.107143	NA	NA	764116	719454	1.02863e+06	1.35586e+06
tr|A0A096UNN1|A0A096UNN1_WHEAT	A0A096UNN1	NA	60S ribosomal protein L36 OS=Triticum aestivum PE=3 SV=1	798.14	0	12	tr|A0A096UNN1|A0A096UNN1_WHEAT	3.35081e+06	1.09589e+07	8.47268e+06	8.68835e+06	8.58052e+06	0.40856	0.25	NA	NA	757647	2.38841e+06	2.38715e+06	2.47092e+06
tr|A0A1D6B3D5|A0A1D6B3D5_WHEAT	A0A1D6B3D5	NA	Clustered mitochondria protein homolog OS=Triticum aestivum PE=3 SV=1	2809.87	0	39	tr|A0A1D6B3D5|A0A1D6B3D5_WHEAT	6.86907e+06	7.44436e+06	6.21216e+06	8.26965e+06	7.15671e+06	0.121345	0.0952381	NA	NA	753531	885379	771153	864454
tr|A0A1D5ZGU3|A0A1D5ZGU3_WHEAT	A0A1D5ZGU3	NA	Uncharacterized protein OS=Triticum aestivum PE=4 SV=1	1843.3	0	28	tr|A0A1D5ZGU3|A0A1D5ZGU3_WHEAT	6.35193e+06	4.81725e+06	2.92697e+06	4.70377e+06	4.76051e+06	0.298033	0.110465	NA	NA	751121	575015	388739	611345
tr|A0A1D5RXW0|A0A1D5RXW0_WHEAT	A0A1D5RXW0	NA	Uncharacterized protein OS=Triticum aestivum PE=3 SV=1	76.12	0.00316289	2	tr|A0A1D5RXW0|A0A1D5RXW0_WHEAT	1.49675e+06	148498	510048	408327	459187	0.921386	0	NA	NA	748373	74248.8	255024	204163
tr|W5E2W7|W5E2W7_WHEAT	W5E2W7	NA	40S ribosomal protein SA OS=Triticum aestivum PE=3 SV=1	1201.2	0	13	tr|W5E2W7|W5E2W7_WHEAT	3.52646e+06	3.91884e+06	7.47044e+06	1.09942e+07	5.69464e+06	0.53954	0.0288462	NA	NA	744807	836398	1.34884e+06	2.8133e+06
tr|W5FJE0|W5FJE0_WHEAT	W5FJE0	NA	Uncharacterized protein OS=Triticum aestivum PE=4 SV=1	2127.77	0	32	tr|W5FJE0|W5FJE0_WHEAT	6.82563e+06	4.84047e+06	3.22265e+06	5.32934e+06	5.0849e+06	0.293757	0.07	NA	NA	743227	596198	407302	764483
tr|W5HA67|W5HA67_WHEAT	W5HA67	NA	Uncharacterized protein OS=Triticum aestivum PE=4 SV=1	1290.25	0	13	tr|W5HA67|W5HA67_WHEAT	3.35403e+06	5.19548e+06	3.60304e+06	2.4431e+06	3.47854e+06	0.313866	0.145833	NA	NA	741377	1.14005e+06	1.01393e+06	591234
tr|W5D5P8|W5D5P8_WHEAT	W5D5P8	TRAES_3BF058300010CFD_c1	Coatomer subunit beta OS=Triticum aestivum GN=TRAES_3BF058300010CFD_c1 PE=4 SV=1	2966.11	0	41	tr|W5D5P8|W5D5P8_WHEAT	6.43633e+06	5.15777e+06	1.06627e+07	9.8876e+06	8.16196e+06	0.330571	0.0901639	NA	NA	738668	541028	1.45519e+06	1.38543e+06
tr|A0A1D5SEJ3|A0A1D5SEJ3_WHEAT	A0A1D5SEJ3	PFK	ATP-dependent 6-phosphofructokinase OS=Triticum aestivum GN=PFK PE=3 SV=1	1410.24	0	20	tr|A0A1D5SEJ3|A0A1D5SEJ3_WHEAT	4.39156e+06	2.36135e+06	2.31969e+06	3.15379e+06	2.75757e+06	0.317081	0.037037	NA	NA	736896	352826	336534	376920
tr|A0A1D6CIT2|A0A1D6CIT2_WHEAT	A0A1D6CIT2	NA	Uncharacterized protein OS=Triticum aestivum PE=4 SV=1	1929.47	0	19	tr|A0A1D6CIT2|A0A1D6CIT2_WHEAT	4.83983e+06	9.22118e+06	4.04348e+06	9.61097e+06	7.0305e+06	0.417775	0.13125	NA	NA	726572	1.28343e+06	626326	1.7061e+06
tr|W5FGW3|W5FGW3_WHEAT	W5FGW3	NA	Uncharacterized protein OS=Triticum aestivum PE=4 SV=1	1450.52	0	14	tr|W5FGW3|W5FGW3_WHEAT	4.87974e+06	1.27384e+07	1.72887e+07	2.67859e+07	1.50136e+07	0.593021	0.0882353	NA	NA	723436	1.81015e+06	3.93536e+06	7.07555e+06
tr|A0A1D5ZLG5|A0A1D5ZLG5_WHEAT	A0A1D5ZLG5	NA	Beta-galactosidase OS=Triticum aestivum PE=3 SV=1	1498.65	0	22	tr|A0A1D5ZLG5|A0A1D5ZLG5_WHEAT	3.53924e+06	3.5992e+06	2.65509e+06	3.22184e+06	3.38054e+06	0.13281	0.0859375	NA	NA	722800	617005	436829	642824
tr|W5FEX7|W5FEX7_WHEAT	W5FEX7	NA	Ribosomal protein L15 OS=Triticum aestivum PE=3 SV=1	1237.34	0	20	tr|W5FEX7|W5FEX7_WHEAT	4.87818e+06	1.65119e+07	8.97501e+06	1.09596e+07	9.96733e+06	0.468129	0.046875	NA	NA	722330	2.23142e+06	1.42291e+06	2.38268e+06
tr|A0A1D5Y8H2|A0A1D5Y8H2_WHEAT	A0A1D5Y8H2	NA	Uncharacterized protein OS=Triticum aestivum PE=4 SV=1	170.54	0	1	tr|A0A1D5Y8H2|A0A1D5Y8H2_WHEAT	2.15791e+06	5.4143e+06	245654	1.46135e+06	1.80963e+06	0.952305	0	NA	NA	719305	1.80477e+06	81884.7	487115
tr|A0A1D5XQK2|A0A1D5XQK2_WHEAT	A0A1D5XQK2	NA	Non-specific lipid-transfer protein OS=Triticum aestivum PE=3 SV=1	336.4	0	4	tr|A0A1D5XQK2|A0A1D5XQK2_WHEAT	2.2287e+06	2.36869e+06	1.55508e+06	2.049e+06	2.13885e+06	0.173225	0.09375	NA	NA	719255	736454	516690	682360
tr|A0A096UK97|A0A096UK97_WHEAT	A0A096UK97	NA	Uncharacterized protein OS=Triticum aestivum PE=3 SV=1	1346.25	0	14	tr|A0A096UK97|A0A096UK97_WHEAT	4.52167e+06	5.59593e+06	7.14543e+06	9.91167e+06	6.37068e+06	0.3446	0.0652174	NA	NA	718235	1.05574e+06	1.45166e+06	2.36678e+06
tr|A0A1D5Y345|A0A1D5Y345_WHEAT	A0A1D5Y345	NA	Uncharacterized protein OS=Triticum aestivum PE=3 SV=1	557.23	0	8	tr|A0A1D5Y345|A0A1D5Y345_WHEAT	3.61493e+06	4.12872e+06	2.11359e+06	2.14829e+06	2.88161e+06	0.342127	0	NA	NA	713945	784469	459910	440258
tr|A0A1D5XJ95|A0A1D5XJ95_WHEAT	A0A1D5XJ95	NA	Serine/threonine-protein phosphatase OS=Triticum aestivum PE=3 SV=1	824.82	0	12	tr|A0A1D5XJ95|A0A1D5XJ95_WHEAT	3.75456e+06	4.40535e+06	4.11218e+06	6.68165e+06	4.25877e+06	0.279106	0.0833333	NA	NA	693690	876410	886462	1.3679e+06
tr|A0A1D6RD30|A0A1D6RD30_WHEAT	A0A1D6RD30	NA	Uncharacterized protein OS=Triticum aestivum PE=3 SV=1	1453.65	0	13	tr|A0A1D6RD30|A0A1D6RD30_WHEAT	2.96177e+06	2.96143e+06	5.92788e+06	7.8377e+06	4.44483e+06	0.486449	0.112903	NA	NA	688819	682355	1.19984e+06	1.77548e+06
tr|W5ACT1|W5ACT1_WHEAT	W5ACT1	NA	Uncharacterized protein OS=Triticum aestivum PE=4 SV=1	171.66	0	1	tr|W5ACT1|W5ACT1_WHEAT	684879	1.52542e+06	1.22483e+06	1.98731e+06	1.37513e+06	0.402887	0	NA	NA	684879	1.52542e+06	1.22483e+06	1.98731e+06
tr|A0A1D5UIS7|A0A1D5UIS7_WHEAT	A0A1D5UIS7	NA	Peroxidase OS=Triticum aestivum PE=3 SV=1	1748.21	0	15	tr|A0A1D5UIS7|A0A1D5UIS7_WHEAT	4.37316e+06	5.22339e+06	6.92581e+06	5.9555e+06	5.58944e+06	0.193023	0.125	NA	NA	682987	843346	1.6475e+06	1.33596e+06
tr|A0A1D6AF39|A0A1D6AF39_WHEAT	A0A1D6AF39	NA	Uncharacterized protein OS=Triticum aestivum PE=4 SV=1	1480.03	0	16	tr|A0A1D6AF39|A0A1D6AF39_WHEAT	3.48353e+06	4.92942e+06	1.94287e+06	2.51844e+06	3.00099e+06	0.405687	0.1	NA	NA	675815	992847	474003	578196
tr|A0A1D6AUC0|A0A1D6AUC0_WHEAT	A0A1D6AUC0	NA	Uncharacterized protein OS=Triticum aestivum PE=3 SV=1	616.87	0	9	tr|A0A1D6AUC0|A0A1D6AUC0_WHEAT	2.36416e+06	1.26511e+06	2.50468e+06	2.63902e+06	2.43442e+06	0.28672	0.0333333	NA	NA	675182	311175	644032	693926
tr|A0A1D6B1U1|A0A1D6B1U1_WHEAT	A0A1D6B1U1	NA	Uncharacterized protein OS=Triticum aestivum PE=4 SV=1	1227.32	0	16	tr|A0A1D6B1U1|A0A1D6B1U1_WHEAT	4.57366e+06	3.43933e+06	2.5746e+06	3.14668e+06	3.293e+06	0.244827	0.0543478	NA	NA	671454	559668	456276	683202
tr|W5GDU0|W5GDU0_WHEAT	W5GDU0	NA	L-lactate dehydrogenase OS=Triticum aestivum PE=3 SV=1	1008.29	0	15	tr|W5GDU0|W5GDU0_WHEAT	4.0148e+06	2.78279e+06	1.94414e+06	2.45955e+06	2.62117e+06	0.314333	0.0263158	NA	NA	667348	501857	372489	449055
tr|A0A1D6A4Q8|A0A1D6A4Q8_WHEAT	A0A1D6A4Q8	NA	Uncharacterized protein OS=Triticum aestivum PE=3 SV=1	1417.13	0	20	tr|A0A1D6A4Q8|A0A1D6A4Q8_WHEAT	4.41483e+06	3.92759e+06	1.29451e+07	1.91711e+07	8.67999e+06	0.723819	0.164062	NA	NA	666673	590207	2.87951e+06	4.54181e+06
tr|W5B9Q2|W5B9Q2_WHEAT	W5B9Q2	NA	Uncharacterized protein OS=Triticum aestivum PE=4 SV=1	1491.23	0	16	tr|W5B9Q2|W5B9Q2_WHEAT	3.42175e+06	3.19456e+06	4.1357e+06	3.14697e+06	3.30815e+06	0.131422	0.0892857	NA	NA	664702	706058	655450	556709
tr|A0A1D5XAR2|A0A1D5XAR2_WHEAT	A0A1D5XAR2	NA	Uncharacterized protein OS=Triticum aestivum PE=4 SV=1	807.11	0	13	tr|A0A1D5XAR2|A0A1D5XAR2_WHEAT	3.38875e+06	2.98145e+06	1.91657e+06	1.83146e+06	2.44901e+06	0.306688	0	NA	NA	659666	670154	296635	342247
tr|A0A1D5URR9|A0A1D5URR9_WHEAT	A0A1D5URR9	NA	Carboxypeptidase OS=Triticum aestivum PE=3 SV=1	1390.27	0	17	tr|A0A1D5URR9|A0A1D5URR9_WHEAT	3.52639e+06	4.76721e+06	6.34967e+06	6.26445e+06	5.51583e+06	0.257631	0.106061	NA	NA	659645	1.12314e+06	1.00604e+06	1.4776e+06
tr|W5HZ68|W5HZ68_WHEAT	W5HZ68	NA	40S ribosomal protein S27 OS=Triticum aestivum PE=3 SV=1	264.29	0	4	tr|W5HZ68|W5HZ68_WHEAT	2.25767e+06	2.1743e+06	4.56176e+06	6.37289e+06	3.40972e+06	0.525247	0	NA	NA	659592	643336	1.20083e+06	2.02837e+06
tr|A0A1D5WSN3|A0A1D5WSN3_WHEAT	A0A1D5WSN3	NA	FRIGIDA-like protein OS=Triticum aestivum PE=3 SV=1	1542.22	0	25	tr|A0A1D5WSN3|A0A1D5WSN3_WHEAT	3.5053e+06	3.60418e+06	2.55807e+06	3.47048e+06	3.48789e+06	0.148452	0.0606061	NA	NA	657525	529125	423268	590397
tr|A0A1D5ZXC7|A0A1D5ZXC7_WHEAT	A0A1D5ZXC7	NA	Uncharacterized protein OS=Triticum aestivum PE=4 SV=1	705.5	0	13	tr|A0A1D5ZXC7|A0A1D5ZXC7_WHEAT	2.38945e+06	2.22092e+06	1.28148e+06	1.27569e+06	1.7512e+06	0.332999	0.0535714	NA	NA	654988	643585	329948	325700
tr|D8L9G7|D8L9G7_WHEAT	D8L9G7	TAA_ctg0079b.00050.1	Alpha-1,4 glucan phosphorylase OS=Triticum aestivum GN=TAA_ctg0079b.00050.1 PE=3 SV=1	2611.53	0	37	tr|D8L9G7|D8L9G7_WHEAT	7.32864e+06	6.19202e+06	5.37092e+06	6.98617e+06	6.5891e+06	0.135017	0.05	NA	NA	653520	568697	613706	789697
tr|W5B193|W5B193_WHEAT	W5B193	NA	Uncharacterized protein OS=Triticum aestivum PE=4 SV=1	1937.86	0	26	tr|W5B193|W5B193_WHEAT	5.00073e+06	3.92569e+06	3.78106e+06	4.60094e+06	4.26332e+06	0.132627	0.0714286	NA	NA	652141	691892	541289	696141
tr|A0A0C4BKF6|A0A0C4BKF6_WHEAT	A0A0C4BKF6	NA	Uncharacterized protein OS=Triticum aestivum PE=3 SV=1	487.5	0	4	tr|A0A0C4BKF6|A0A0C4BKF6_WHEAT	2.17746e+06	1.61375e+06	1.69909e+06	1.58073e+06	1.65642e+06	0.157062	0.09375	NA	NA	647738	481013	509782	521712
tr|Q9SBB7|Q9SBB7_WHEAT	Q9SBB7	hsp26.6	Chloroplast small heat shock protein OS=Triticum aestivum GN=hsp26.6 PE=2 SV=1	671.17	0	7	tr|Q9SBB7|Q9SBB7_WHEAT	2.23543e+06	3.50334e+06	1.31278e+06	2.14144e+06	2.18843e+06	0.393366	0.125	NA	NA	643109	1.01703e+06	330532	661013
tr|W5F732|W5F732_WHEAT	W5F732	NA	Uncharacterized protein OS=Triticum aestivum PE=4 SV=1	656.75	0	8	tr|W5F732|W5F732_WHEAT	3.0486e+06	3.75932e+06	2.05344e+06	3.14392e+06	3.09626e+06	0.235253	0.125	NA	NA	643080	834489	496149	835100
tr|A0A1D5W0E2|A0A1D5W0E2_WHEAT	A0A1D5W0E2	NA	Uncharacterized protein OS=Triticum aestivum PE=4 SV=1	63.52	0.00736377	1	tr|A0A1D5W0E2|A0A1D5W0E2_WHEAT	642016	531819	691521	852207	666769	0.195985	0.375	NA	NA	642016	531819	691521	852207
tr|A0A1D5YSK2|A0A1D5YSK2_WHEAT	A0A1D5YSK2	NA	Uncharacterized protein OS=Triticum aestivum PE=4 SV=1	807.2	0	10	tr|A0A1D5YSK2|A0A1D5YSK2_WHEAT	2.61362e+06	4.20232e+06	1.871e+06	2.36724e+06	2.49043e+06	0.364632	0.0833333	NA	NA	634259	1.14317e+06	440588	562759
tr|A0A1D6C124|A0A1D6C124_WHEAT	A0A1D6C124	NA	Uncharacterized protein OS=Triticum aestivum PE=3 SV=1	2238.6	0	28	tr|A0A1D6C124|A0A1D6C124_WHEAT	5.48846e+06	7.06727e+06	2.99017e+06	4.08481e+06	4.78664e+06	0.359821	0.134146	NA	NA	627653	794365	382282	501515
tr|A0A1D6S125|A0A1D6S125_WHEAT	A0A1D6S125	NA	Uncharacterized protein OS=Triticum aestivum PE=4 SV=1	2096.61	0	28	tr|A0A1D6S125|A0A1D6S125_WHEAT	4.47881e+06	4.08325e+06	7.82088e+06	8.13471e+06	6.14984e+06	0.349831	0.101064	NA	NA	622335	493799	1.10088e+06	1.07389e+06
tr|A0A1D5RPY0|A0A1D5RPY0_WHEAT	A0A1D5RPY0	NA	Uncharacterized protein OS=Triticum aestivum PE=4 SV=1	1715.96	0	21	tr|A0A1D5RPY0|A0A1D5RPY0_WHEAT	4.8681e+06	4.05214e+06	4.8834e+06	6.89229e+06	4.87575e+06	0.233778	0.0757576	NA	NA	617871	544102	978877	1.4284e+06
tr|A0A1D5RPX0|A0A1D5RPX0_WHEAT	A0A1D5RPX0	NA	Uncharacterized protein OS=Triticum aestivum PE=4 SV=1	868.8	0	9	tr|A0A1D5RPX0|A0A1D5RPX0_WHEAT	2.3401e+06	3.30256e+06	2.06719e+06	2.86112e+06	2.60061e+06	0.207933	0.236842	NA	NA	606692	767753	602057	884126
tr|A0A1D5WEQ2|A0A1D5WEQ2_WHEAT	A0A1D5WEQ2	NA	Uncharacterized protein OS=Triticum aestivum PE=4 SV=1	1709.32	0	19	tr|A0A1D5WEQ2|A0A1D5WEQ2_WHEAT	4.05897e+06	5.09239e+06	6.07497e+06	7.98701e+06	5.58368e+06	0.288174	0.125	NA	NA	605968	895982	1.02567e+06	1.35668e+06
tr|A0A1D6CC55|A0A1D6CC55_WHEAT	A0A1D6CC55	NA	Uncharacterized protein OS=Triticum aestivum PE=4 SV=1	4138.68	0	56	tr|A0A1D6CC55|A0A1D6CC55_WHEAT	7.40404e+06	8.08352e+06	5.98317e+06	7.681e+06	7.54252e+06	0.125342	0.0722222	NA	NA	605055	693707	514910	725649
tr|A0A1D5WHJ3|A0A1D5WHJ3_WHEAT	A0A1D5WHJ3	NA	Uncharacterized protein OS=Triticum aestivum PE=4 SV=1	569.43	0	10	tr|A0A1D5WHJ3|A0A1D5WHJ3_WHEAT	3.48431e+06	3.00679e+06	2.57839e+06	3.1169e+06	3.06185e+06	0.122424	0.0833333	NA	NA	605028	639932	633458	758357
tr|D8L9P6|D8L9P6_WHEAT	D8L9P6	TAA_ctg0616b.00240.1	60S ribosomal protein L37a, expressed OS=Triticum aestivum GN=TAA_ctg0616b.00240.1 PE=1 SV=1	591.64	0	8	tr|D8L9P6|D8L9P6_WHEAT	2.35172e+06	1.10572e+07	7.83492e+06	1.06954e+07	9.26516e+06	0.503767	0.1	NA	NA	604233	2.70623e+06	1.53377e+06	2.88184e+06
tr|A0A1D5WF58|A0A1D5WF58_WHEAT	A0A1D5WF58	NA	Aspartate aminotransferase OS=Triticum aestivum PE=4 SV=1	1264.41	0	16	tr|A0A1D5WF58|A0A1D5WF58_WHEAT	3.33502e+06	3.38891e+06	2.85812e+06	4.95763e+06	3.36197e+06	0.251312	0.0673077	NA	NA	594583	622414	554052	967912
tr|A0A1D5Y0Q9|A0A1D5Y0Q9_WHEAT	A0A1D5Y0Q9	NA	Uncharacterized protein OS=Triticum aestivum PE=3 SV=1	563.71	0	8	tr|A0A1D5Y0Q9|A0A1D5Y0Q9_WHEAT	2.1932e+06	2.93182e+06	1.96769e+06	2.56641e+06	2.37981e+06	0.175582	0.0833333	NA	NA	594512	873314	572909	737908
tr|A0A1D6CF58|A0A1D6CF58_WHEAT	A0A1D6CF58	NA	Endoglucanase OS=Triticum aestivum PE=3 SV=1	766.67	0	15	tr|A0A1D6CF58|A0A1D6CF58_WHEAT	2.87321e+06	1.34869e+06	1.84468e+06	2.20896e+06	2.02682e+06	0.310188	0.0735294	NA	NA	593299	338167	408195	498385
tr|W5GE58|W5GE58_WHEAT	W5GE58	NA	Aspartate aminotransferase OS=Triticum aestivum PE=4 SV=1	1118.34	0	19	tr|W5GE58|W5GE58_WHEAT	3.36479e+06	3.44644e+06	3.00026e+06	4.09934e+06	3.40561e+06	0.131572	0.0648148	NA	NA	590710	650493	570712	751597
tr|W5H8V6|W5H8V6_WHEAT	W5H8V6	NA	Uncharacterized protein OS=Triticum aestivum PE=3 SV=1	656.06	0	7	tr|W5H8V6|W5H8V6_WHEAT	2.10665e+06	8.85892e+06	7.69008e+06	6.79178e+06	7.24093e+06	0.465329	0.0227273	NA	NA	590220	2.40533e+06	2.28766e+06	2.06136e+06
tr|W5E6W1|W5E6W1_WHEAT	W5E6W1	NA	Uncharacterized protein OS=Triticum aestivum PE=3 SV=1	287.18	0	5	tr|W5E6W1|W5E6W1_WHEAT	1.81806e+06	2.45831e+06	702703	499557	1.26038e+06	0.678142	0.107143	NA	NA	587535	796323	234224	165574
tr|A0A077RPI9|A0A077RPI9_WHEAT	A0A077RPI9	TRAES_3BF010400150CFD_c1	Uncharacterized protein OS=Triticum aestivum GN=TRAES_3BF010400150CFD_c1 PE=3 SV=1	313.19	0	4	tr|A0A077RPI9|A0A077RPI9_WHEAT	1.76563e+06	2.72512e+06	1.98306e+06	2.68198e+06	2.33252e+06	0.212857	0	NA	NA	586958	889917	660037	893328
tr|A0A1D5XD27|A0A1D5XD27_WHEAT	A0A1D5XD27	NA	Uncharacterized protein OS=Triticum aestivum PE=4 SV=1	1310.34	0	17	tr|A0A1D5XD27|A0A1D5XD27_WHEAT	3.01457e+06	3.24656e+06	1.54995e+06	1.22729e+06	2.28226e+06	0.450839	0.1	NA	NA	585601	597379	215859	215344
tr|A0A1D5YDP6|A0A1D5YDP6_WHEAT	A0A1D5YDP6	NA	Uncharacterized protein OS=Triticum aestivum PE=4 SV=1	4179.01	0	55	tr|A0A1D5YDP6|A0A1D5YDP6_WHEAT	5.99745e+06	5.82584e+06	7.60977e+06	1.21691e+07	6.80361e+06	0.374277	0.102564	NA	NA	584937	543620	576227	1.3893e+06
tr|W4ZRU3|W4ZRU3_WHEAT	W4ZRU3	NA	Uncharacterized protein OS=Triticum aestivum PE=4 SV=1	1147.5	0	14	tr|W4ZRU3|W4ZRU3_WHEAT	2.58683e+06	6.91204e+06	1.01747e+07	1.25676e+07	8.54339e+06	0.536327	0.14	NA	NA	582587	1.43227e+06	2.15888e+06	2.90744e+06
tr|A0A1D6B740|A0A1D6B740_WHEAT	A0A1D6B740	NA	Uncharacterized protein OS=Triticum aestivum PE=3 SV=1	2678.26	0	42	tr|A0A1D6B740|A0A1D6B740_WHEAT	6.82151e+06	4.54582e+06	3.57733e+06	2.96037e+06	4.06157e+06	0.378488	0.127273	NA	NA	581926	372326	581710	428015
tr|A0A1D5TTP6|A0A1D5TTP6_WHEAT	A0A1D5TTP6	NA	Peroxidase OS=Triticum aestivum PE=3 SV=1	568.52	0	7	tr|A0A1D5TTP6|A0A1D5TTP6_WHEAT	2.18732e+06	2.38965e+06	1.3436e+06	1.31996e+06	1.76546e+06	0.308582	0.0909091	NA	NA	576813	640750	353665	375650
tr|A0A1D5SCR1|A0A1D5SCR1_WHEAT	A0A1D5SCR1	NA	Structural maintenance of chromosomes protein OS=Triticum aestivum PE=3 SV=1	5118.15	0	92	tr|A0A1D5SCR1|A0A1D5SCR1_WHEAT	1.04758e+07	8.8423e+06	7.5492e+06	8.83282e+06	8.83756e+06	0.134345	0.105469	NA	NA	575604	487491	579194	696485
tr|A0A1D5ZTI1|A0A1D5ZTI1_WHEAT	A0A1D5ZTI1	NA	Uncharacterized protein OS=Triticum aestivum PE=4 SV=1	122.28	0.000654879	1	tr|A0A1D5ZTI1|A0A1D5ZTI1_WHEAT	571188	622453	568060	1.10099e+06	596820	0.36062	0	NA	NA	571188	622453	568060	1.10099e+06
tr|A0A1D5YB71|A0A1D5YB71_WHEAT	A0A1D5YB71	NA	Uncharacterized protein OS=Triticum aestivum PE=3 SV=1	1833.32	0	21	tr|A0A1D5YB71|A0A1D5YB71_WHEAT	3.72495e+06	7.91373e+06	8.84657e+06	8.67038e+06	8.29206e+06	0.330665	0.131579	NA	NA	569346	1.22452e+06	1.49999e+06	1.61785e+06
tr|A0A1D6A7A8|A0A1D6A7A8_WHEAT	A0A1D6A7A8	NA	Uncharacterized protein OS=Triticum aestivum PE=3 SV=1	1693.19	0	18	tr|A0A1D6A7A8|A0A1D6A7A8_WHEAT	4.01849e+06	4.193e+06	3.91747e+06	4.8469e+06	4.10574e+06	0.0984364	0.0606061	NA	NA	567578	619511	599267	890283
tr|A0A1D5TAW7|A0A1D5TAW7_WHEAT	A0A1D5TAW7	NA	Superoxide dismutase OS=Triticum aestivum PE=3 SV=1	162.03	0	2	tr|A0A1D5TAW7|A0A1D5TAW7_WHEAT	1.13503e+06	1.43618e+06	3.50401e+06	3.04618e+06	2.24118e+06	0.513174	0	NA	NA	567517	718089	1.752e+06	1.52309e+06
tr|W5EST8|W5EST8_WHEAT	W5EST8	NA	Uncharacterized protein OS=Triticum aestivum PE=4 SV=1	777.71	0	14	tr|W5EST8|W5EST8_WHEAT	3.30661e+06	2.96303e+06	3.20742e+06	2.80678e+06	3.08523e+06	0.0741592	0.144231	NA	NA	567016	527762	932467	860889
tr|A0A1D5YN63|A0A1D5YN63_WHEAT	A0A1D5YN63	NA	Uncharacterized protein OS=Triticum aestivum PE=4 SV=1	269.13	0	7	tr|A0A1D5YN63|A0A1D5YN63_WHEAT	1.77319e+06	3.54587e+06	639135	1.09302e+06	1.43311e+06	0.724301	0.15625	NA	NA	565655	1.10746e+06	200154	353151
tr|W5BNJ7|W5BNJ7_WHEAT	W5BNJ7	NA	Uncharacterized protein OS=Triticum aestivum PE=4 SV=1	119.98	0.000650195	1	tr|W5BNJ7|W5BNJ7_WHEAT	564925	396154	65610.4	41279.7	230882	0.959657	0.125	NA	NA	564925	396154	65610.4	41279.7
tr|A0A1D5UW01|A0A1D5UW01_WHEAT	A0A1D5UW01	NA	Uncharacterized protein OS=Triticum aestivum PE=4 SV=1	3329.76	0	42	tr|A0A1D5UW01|A0A1D5UW01_WHEAT	6.4033e+06	1.06109e+07	6.1141e+06	7.96469e+06	7.18399e+06	0.264882	0.1	NA	NA	561802	979962	415524	710705
tr|A0A1D6C7V9|A0A1D6C7V9_WHEAT	A0A1D6C7V9	NA	Uncharacterized protein OS=Triticum aestivum PE=4 SV=1	61.67	0	1	tr|A0A1D6C7V9|A0A1D6C7V9_WHEAT	556443	807835	65612.7	36074.3	311028	1.03371	0	NA	NA	556443	807835	65612.7	36074.3
tr|A0A1D5UWJ6|A0A1D5UWJ6_WHEAT	A0A1D5UWJ6	NA	Uncharacterized protein OS=Triticum aestivum PE=3 SV=1	953.43	0	14	tr|A0A1D5UWJ6|A0A1D5UWJ6_WHEAT	3.53951e+06	3.98807e+06	3.10657e+06	4.18946e+06	3.76379e+06	0.130376	0.0131579	NA	NA	555713	692966	556789	832114
tr|A0A1D6A5I2|A0A1D6A5I2_WHEAT	A0A1D6A5I2	NA	Uncharacterized protein OS=Triticum aestivum PE=4 SV=1	1020.92	0	17	tr|A0A1D6A5I2|A0A1D6A5I2_WHEAT	2.06819e+06	2.6236e+06	2.55206e+06	2.84195e+06	2.58783e+06	0.129435	0.09375	NA	NA	554245	599329	624908	710524
tr|A0A1D5XQK4|A0A1D5XQK4_WHEAT	A0A1D5XQK4	NA	Uncharacterized protein OS=Triticum aestivum PE=4 SV=1	1978.46	0	26	tr|A0A1D5XQK4|A0A1D5XQK4_WHEAT	3.77968e+06	4.31588e+06	3.70507e+06	4.37026e+06	4.04778e+06	0.0862921	0.10625	NA	NA	553110	724752	492437	642232
tr|A0A1D6DJG7|A0A1D6DJG7_WHEAT	A0A1D6DJG7	NA	Coatomer subunit alpha OS=Triticum aestivum PE=4 SV=1	1461.51	0	24	tr|A0A1D6DJG7|A0A1D6DJG7_WHEAT	3.84923e+06	3.42141e+06	2.30936e+06	2.70398e+06	3.0627e+06	0.225853	0.0833333	NA	NA	550931	593990	279034	361544
tr|A0A1D6CE84|A0A1D6CE84_WHEAT	A0A1D6CE84	NA	Ribosomal protein OS=Triticum aestivum PE=3 SV=1	613.57	0	4	tr|A0A1D6CE84|A0A1D6CE84_WHEAT	1.65129e+06	4.37096e+06	6.57283e+06	4.60227e+06	4.48661e+06	0.470542	0.175	NA	NA	550260	1.4287e+06	2.19061e+06	1.52455e+06
tr|W5DS33|W5DS33_WHEAT	W5DS33	NA	Uncharacterized protein OS=Triticum aestivum PE=3 SV=1	933.81	0	12	tr|W5DS33|W5DS33_WHEAT	3.49003e+06	2.66998e+06	8.88795e+06	7.06958e+06	5.2798e+06	0.532284	0.125	NA	NA	547559	632569	1.98837e+06	1.8561e+06
tr|A0A1D6C929|A0A1D6C929_WHEAT	A0A1D6C929	NA	Uncharacterized protein OS=Triticum aestivum PE=3 SV=1	255.47	0	3	tr|A0A1D6C929|A0A1D6C929_WHEAT	1.62881e+06	2.31115e+06	1.5623e+06	2.28347e+06	1.95614e+06	0.208702	0	NA	NA	542935	770383	520768	761156
tr|A0A1D6SDJ6|A0A1D6SDJ6_WHEAT	A0A1D6SDJ6	NA	Uncharacterized protein OS=Triticum aestivum PE=4 SV=1	1222.84	0	16	tr|A0A1D6SDJ6|A0A1D6SDJ6_WHEAT	3.20996e+06	3.03347e+06	4.37718e+06	4.90491e+06	3.79357e+06	0.233454	0.0208333	NA	NA	541714	536935	1.1537e+06	1.20382e+06
tr|A0A1D5YBH4|A0A1D5YBH4_WHEAT	A0A1D5YBH4	NA	Uncharacterized protein OS=Triticum aestivum PE=4 SV=1	57.71	0.008916	1	tr|A0A1D5YBH4|A0A1D5YBH4_WHEAT	540613	631885	603906	374976	572260	0.213995	0	NA	NA	540613	631885	603906	374976
tr|A0A1D5SA32|A0A1D5SA32_WHEAT	A0A1D5SA32	NA	Uncharacterized protein OS=Triticum aestivum PE=3 SV=1	2577.13	0	35	tr|A0A1D5SA32|A0A1D5SA32_WHEAT	5.03671e+06	4.2004e+06	3.16628e+06	4.1996e+06	4.2e+06	0.184476	0.103261	NA	NA	538633	521669	365285	541221
tr|A0A1D5YM85|A0A1D5YM85_WHEAT	A0A1D5YM85	NA	Uncharacterized protein OS=Triticum aestivum PE=4 SV=1	276.55	0	4	tr|A0A1D5YM85|A0A1D5YM85_WHEAT	1.60578e+06	1.15798e+06	167130	175278	666629	0.93041	0.05	NA	NA	533205	385987	51011	58420.9
tr|A0A1D5UGF0|A0A1D5UGF0_WHEAT	A0A1D5UGF0	NA	Uncharacterized protein OS=Triticum aestivum PE=3 SV=1	1596.46	0	21	tr|A0A1D5UGF0|A0A1D5UGF0_WHEAT	3.20117e+06	3.06469e+06	5.66483e+06	4.77318e+06	3.98717e+06	0.301592	0.166667	NA	NA	532988	502889	965430	870709
tr|A0A1D6CKW3|A0A1D6CKW3_WHEAT	A0A1D6CKW3	NA	Uncharacterized protein OS=Triticum aestivum PE=4 SV=1	737.23	0	11	tr|A0A1D6CKW3|A0A1D6CKW3_WHEAT	2.01617e+06	1.6109e+06	3.56722e+06	2.5786e+06	2.29738e+06	0.347045	0.0357143	NA	NA	532389	415340	642040	512500
tr|A0A1D5Y2T2|A0A1D5Y2T2_WHEAT	A0A1D5Y2T2	NA	Coatomer subunit alpha OS=Triticum aestivum PE=4 SV=1	3859.47	0	59	tr|A0A1D5Y2T2|A0A1D5Y2T2_WHEAT	8.01988e+06	7.77128e+06	9.87847e+06	9.98728e+06	8.94918e+06	0.132534	0.0921053	NA	NA	531959	520651	720558	920048
tr|W5DZS4|W5DZS4_WHEAT	W5DZS4	NA	Uncharacterized protein OS=Triticum aestivum PE=4 SV=1	1262.33	0	19	tr|W5DZS4|W5DZS4_WHEAT	3.21012e+06	3.42193e+06	3.70835e+06	4.68598e+06	3.56514e+06	0.173657	0.0530303	NA	NA	531124	563950	558357	888610
tr|A0A1D6BWZ8|A0A1D6BWZ8_WHEAT	A0A1D6BWZ8	NA	Uncharacterized protein OS=Triticum aestivum PE=4 SV=1	184.52	0	2	tr|A0A1D6BWZ8|A0A1D6BWZ8_WHEAT	1.04849e+06	1.11155e+06	344586	803718	926104	0.420743	0.125	NA	NA	524245	555777	172293	401859
tr|A0A1D5X2E0|A0A1D5X2E0_WHEAT	A0A1D5X2E0	NA	Protein transport protein Sec61 subunit beta OS=Triticum aestivum PE=3 SV=1	246.98	0	3	tr|A0A1D5X2E0|A0A1D5X2E0_WHEAT	1.66435e+06	1.98547e+06	427517	242908	1.04594e+06	0.808537	0	NA	NA	524035	655622	129337	80057.9
tr|A0A1D5UU04|A0A1D5UU04_WHEAT	A0A1D5UU04	NA	Peroxidase OS=Triticum aestivum PE=3 SV=1	271.59	0	5	tr|A0A1D5UU04|A0A1D5UU04_WHEAT	1.6963e+06	576391	452027	607860	592126	0.695387	0.0833333	NA	NA	523759	152504	122743	193710
tr|A0A1D5WTH3|A0A1D5WTH3_WHEAT	A0A1D5WTH3	NA	Glutamate decarboxylase OS=Triticum aestivum PE=3 SV=1	285.46	0	2	tr|A0A1D5WTH3|A0A1D5WTH3_WHEAT	1.04639e+06	2.13185e+06	1.37614e+06	1.85727e+06	1.6167e+06	0.302563	0.0625	NA	NA	523193	1.06592e+06	688069	928636
tr|A0A1D5VFL6|A0A1D5VFL6_WHEAT	A0A1D5VFL6	NA	Uncharacterized protein OS=Triticum aestivum PE=4 SV=1	933.14	0	18	tr|A0A1D5VFL6|A0A1D5VFL6_WHEAT	3.07223e+06	3.05353e+06	1.54489e+07	1.26081e+07	7.84019e+06	0.75317	0.03125	NA	NA	520431	473175	2.78618e+06	2.62425e+06
tr|A0A1D5YPU6|A0A1D5YPU6_WHEAT	A0A1D5YPU6	NA	Uncharacterized protein OS=Triticum aestivum PE=4 SV=1	762.82	0	11	tr|A0A1D5YPU6|A0A1D5YPU6_WHEAT	2.50376e+06	2.4449e+06	6.82352e+06	3.28917e+06	2.89646e+06	0.551026	0.0294118	NA	NA	519764	578595	1.38385e+06	646202
tr|A0A1D5RU52|A0A1D5RU52_WHEAT	A0A1D5RU52	NA	Uncharacterized protein OS=Triticum aestivum PE=4 SV=1	44.14	0	1	tr|A0A1D5RU52|A0A1D5RU52_WHEAT	519504	367888	278552	280036	323962	0.31347	0	NA	NA	519504	367888	278552	280036
tr|U5HTD8|U5HTD8_WHEAT	U5HTD8	rps20	Ribosomal protein S20 OS=Triticum aestivum GN=rps20 PE=2 SV=1	403.87	0	5	tr|U5HTD8|U5HTD8_WHEAT	1.88198e+06	1.22652e+06	1.78085e+06	1.80616e+06	1.79351e+06	0.18001	0.09375	NA	NA	517524	307879	542777	571152
tr|W5APG2|W5APG2_WHEAT	W5APG2	NA	Uncharacterized protein OS=Triticum aestivum PE=4 SV=1	1187.33	0	11	tr|W5APG2|W5APG2_WHEAT	1.87201e+06	1.63591e+06	7.91988e+06	4.93574e+06	3.40388e+06	0.724117	0.125	NA	NA	515413	419097	2.14904e+06	1.2918e+06
tr|A0A1D5TS54|A0A1D5TS54_WHEAT	A0A1D5TS54	NA	Uncharacterized protein OS=Triticum aestivum PE=4 SV=1	1212.81	0	17	tr|A0A1D5TS54|A0A1D5TS54_WHEAT	2.86096e+06	2.52829e+06	2.59474e+06	3.3219e+06	2.72785e+06	0.127441	0.0681818	NA	NA	512419	416726	564362	696008
tr|A0A1D6CQJ4|A0A1D6CQJ4_WHEAT	A0A1D6CQJ4	NA	60S ribosomal protein L27 OS=Triticum aestivum PE=3 SV=1	614.02	0	2	tr|A0A1D6CQJ4|A0A1D6CQJ4_WHEAT	1.53257e+06	3.79841e+06	3.0866e+06	5.39557e+06	3.44251e+06	0.464386	0.0454545	NA	NA	510858	1.26614e+06	1.02887e+06	1.79852e+06
tr|A0A1D5UH61|A0A1D5UH61_WHEAT	A0A1D5UH61	NA	Uncharacterized protein OS=Triticum aestivum PE=3 SV=1	2721.05	0	43	tr|A0A1D5UH61|A0A1D5UH61_WHEAT	5.45809e+06	7.14773e+06	5.14047e+06	5.23243e+06	5.34526e+06	0.164472	0.102679	NA	NA	509394	634183	512961	536805
tr|W5GNV1|W5GNV1_WHEAT	W5GNV1	NA	Uncharacterized protein OS=Triticum aestivum PE=3 SV=1	419.09	0	6	tr|W5GNV1|W5GNV1_WHEAT	1.66842e+06	1.53105e+06	831208	954933	1.24299e+06	0.332889	0.125	NA	NA	508840	506772	236115	294649
tr|W5GDU9|W5GDU9_WHEAT	W5GDU9	NA	Uncharacterized protein OS=Triticum aestivum PE=4 SV=1	2697.04	0	36	tr|W5GDU9|W5GDU9_WHEAT	4.62373e+06	8.02774e+06	6.35057e+06	4.7143e+06	5.53244e+06	0.271287	0.137931	NA	NA	506212	993415	757408	634980
tr|A0A0C4BKI1|A0A0C4BKI1_WHEAT	A0A0C4BKI1	NA	Uncharacterized protein OS=Triticum aestivum PE=4 SV=1	1037.32	0	13	tr|A0A0C4BKI1|A0A0C4BKI1_WHEAT	2.86343e+06	1.17928e+07	5.00064e+06	5.85096e+06	5.4258e+06	0.59951	0.0833333	NA	NA	502754	2.30879e+06	860366	1.02718e+06
sp|P04464|CALM_WHEAT	P04464	NA	Calmodulin OS=Triticum aestivum PE=1 SV=3	841.63	0	6	sp|P04464|CALM_WHEAT	1.86364e+06	2.02818e+06	1.85273e+06	2.07882e+06	1.94591e+06	0.0586617	0.107143	NA	NA	501744	563957	458842	555896
tr|Q7X748|Q7X748_WHEAT	Q7X748	RPL3	Ribosomal protein L3 OS=Triticum aestivum GN=RPL3 PE=2 SV=1	1435.18	0	20	tr|Q7X748|Q7X748_WHEAT	3.25795e+06	1.19306e+07	9.93785e+06	1.21755e+07	1.09342e+07	0.446872	0.0855263	NA	NA	500012	1.95808e+06	1.40601e+06	2.56912e+06
tr|A0A1D6DDQ8|A0A1D6DDQ8_WHEAT	A0A1D6DDQ8	NA	Uncharacterized protein OS=Triticum aestivum PE=4 SV=1	447.35	0	6	tr|A0A1D6DDQ8|A0A1D6DDQ8_WHEAT	1.71804e+06	3.12707e+06	1.75286e+06	2.60942e+06	2.18114e+06	0.298657	0.2	NA	NA	498502	810793	502917	671294
tr|G8IPQ3|G8IPQ3_WHEAT	G8IPQ3	MCA4	Metacaspase 4 OS=Triticum aestivum GN=MCA4 PE=2 SV=1	1139.97	0	13	tr|G8IPQ3|G8IPQ3_WHEAT	2.36264e+06	3.07002e+06	2.04962e+06	1.6456e+06	2.20613e+06	0.263717	0.130435	NA	NA	496741	645079	461142	327460
tr|W5G5H3|W5G5H3_WHEAT	W5G5H3	NA	Glyceraldehyde-3-phosphate dehydrogenase OS=Triticum aestivum PE=3 SV=1	115.34	0.00127226	2	tr|W5G5H3|W5G5H3_WHEAT	984192	201783	1.00665e+06	1.23757e+06	995423	0.526999	0	NA	NA	492096	100892	503327	618785
tr|A0A1D6BSA1|A0A1D6BSA1_WHEAT	A0A1D6BSA1	NA	Uncharacterized protein OS=Triticum aestivum PE=3 SV=1	980.45	0	14	tr|A0A1D6BSA1|A0A1D6BSA1_WHEAT	2.80679e+06	1.69271e+06	952933	1.04044e+06	1.36657e+06	0.526913	0.0833333	NA	NA	488694	263983	182028	192060
tr|A0A1D5U5I5|A0A1D5U5I5_WHEAT	A0A1D5U5I5	NA	Uncharacterized protein OS=Triticum aestivum PE=4 SV=1	619.46	0	8	tr|A0A1D5U5I5|A0A1D5U5I5_WHEAT	1.66787e+06	2.55306e+06	1.05682e+06	1.43227e+06	1.55007e+06	0.378915	0.269231	NA	NA	486263	696707	316474	424077
tr|A0A1D5SDI4|A0A1D5SDI4_WHEAT	A0A1D5SDI4	NA	Uncharacterized protein OS=Triticum aestivum PE=3 SV=1	834.3	0	6	tr|A0A1D5SDI4|A0A1D5SDI4_WHEAT	2.08569e+06	2.40365e+06	1.40751e+06	1.63737e+06	1.86153e+06	0.237149	0.0384615	NA	NA	485438	642173	343136	368823
tr|W5FDW8|W5FDW8_WHEAT	W5FDW8	NA	UDP-glucose 6-dehydrogenase OS=Triticum aestivum PE=3 SV=1	151.89	0	2	tr|W5FDW8|W5FDW8_WHEAT	968545	1.23668e+06	1.00178e+06	1.03595e+06	1.01886e+06	0.113582	0	NA	NA	484272	618342	500890	517973
tr|W5C7G6|W5C7G6_WHEAT	W5C7G6	EIF6	Eukaryotic translation initiation factor 6 OS=Triticum aestivum GN=EIF6 PE=3 SV=1	570.19	0	7	tr|W5C7G6|W5C7G6_WHEAT	1.70265e+06	1.42155e+06	1.35329e+06	2.45195e+06	1.5621e+06	0.290348	0	NA	NA	483394	439059	364601	731162
tr|A0A1D6BPN9|A0A1D6BPN9_WHEAT	A0A1D6BPN9	NA	T-complex protein 1 subunit delta OS=Triticum aestivum PE=3 SV=1	1546.27	0	18	tr|A0A1D6BPN9|A0A1D6BPN9_WHEAT	3.1502e+06	2.74258e+06	1.80901e+06	1.7487e+06	2.2758e+06	0.294059	0.0925926	NA	NA	483279	500771	315580	314966
tr|A0A1D6B234|A0A1D6B234_WHEAT	A0A1D6B234	NA	Uncharacterized protein OS=Triticum aestivum PE=4 SV=1	443.63	0	3	tr|A0A1D6B234|A0A1D6B234_WHEAT	1.44307e+06	1.32859e+06	2.19151e+06	2.51697e+06	1.81729e+06	0.308326	0.0714286	NA	NA	481024	442862	730505	838989
tr|A0A1D6ARD7|A0A1D6ARD7_WHEAT	A0A1D6ARD7	NA	Uncharacterized protein OS=Triticum aestivum PE=4 SV=1	267.65	0	4	tr|A0A1D6ARD7|A0A1D6ARD7_WHEAT	1.44267e+06	286370	1.02331e+06	884030	953669	0.52607	0.0357143	NA	NA	480534	95342.8	312917	285032
tr|W5G1S5|W5G1S5_WHEAT	W5G1S5	NA	Uncharacterized protein OS=Triticum aestivum PE=4 SV=1	1109.95	0	8	tr|W5G1S5|W5G1S5_WHEAT	2.15165e+06	2.89896e+06	2.45354e+07	2.11204e+07	1.20097e+07	0.931501	0.047619	NA	NA	478429	597663	5.9072e+06	5.94452e+06
tr|A0A1D6C1H5|A0A1D6C1H5_WHEAT	A0A1D6C1H5	NA	Uncharacterized protein OS=Triticum aestivum PE=4 SV=1	520.31	0	5	tr|A0A1D6C1H5|A0A1D6C1H5_WHEAT	1.71204e+06	799188	569381	1.1207e+06	959943	0.471962	0.03125	NA	NA	475421	236691	164900	284106
tr|A0A1D6SC04|A0A1D6SC04_WHEAT	A0A1D6SC04	NA	Uncharacterized protein OS=Triticum aestivum PE=4 SV=1	3138.33	0	43	tr|A0A1D6SC04|A0A1D6SC04_WHEAT	5.03628e+06	5.91225e+06	4.64924e+06	6.1509e+06	5.47426e+06	0.130771	0.158451	NA	NA	474331	610369	590296	677237
tr|A0A1D6AF35|A0A1D6AF35_WHEAT	A0A1D6AF35	NA	Uncharacterized protein OS=Triticum aestivum PE=3 SV=1	1221.18	0	15	tr|A0A1D6AF35|A0A1D6AF35_WHEAT	2.92618e+06	4.22226e+06	1.47797e+06	2.12595e+06	2.52607e+06	0.439685	0.0434783	NA	NA	469375	636000	248024	326425
tr|A0A1D6BW39|A0A1D6BW39_WHEAT	A0A1D6BW39	NA	Uncharacterized protein OS=Triticum aestivum PE=4 SV=1	3534.95	0	42	tr|A0A1D6BW39|A0A1D6BW39_WHEAT	6.26292e+06	8.03822e+06	5.50633e+06	7.66915e+06	6.96603e+06	0.172895	0.116438	NA	NA	465413	796000	592645	732932
sp|P24066|RR12_WHEAT	P24066	rps12-A	30S ribosomal protein S12, chloroplastic OS=Triticum aestivum GN=rps12-A PE=3 SV=2	144.14	0	3	sp|P24066|RR12_WHEAT	1.39566e+06	1.01207e+06	90472.9	117182	564625	1.00057	0	NA	NA	465222	337356	30157.6	39060.5
tr|A0A1D6DLV1|A0A1D6DLV1_WHEAT	A0A1D6DLV1	NA	Uncharacterized protein OS=Triticum aestivum PE=4 SV=1	2933.11	0	38	tr|A0A1D6DLV1|A0A1D6DLV1_WHEAT	4.5275e+06	8.58294e+06	3.73616e+06	3.9247e+06	4.2261e+06	0.440057	0.0735294	NA	NA	464202	902245	310496	413951
tr|W5DSB4|W5DSB4_WHEAT	W5DSB4	NA	Uncharacterized protein OS=Triticum aestivum PE=4 SV=1	572.01	0	9	tr|W5DSB4|W5DSB4_WHEAT	2.10832e+06	3.54858e+06	3.27636e+06	2.4784e+06	2.87738e+06	0.235825	0.107143	NA	NA	462835	775353	1.03014e+06	741245
tr|A0A1D5VKZ0|A0A1D5VKZ0_WHEAT	A0A1D5VKZ0	NA	Uncharacterized protein OS=Triticum aestivum PE=4 SV=1	144.8	0	1	tr|A0A1D5VKZ0|A0A1D5VKZ0_WHEAT	457045	994359	841092	1.04161e+06	917726	0.318143	0	NA	NA	457045	994359	841092	1.04161e+06
tr|A0A1D6DBB8|A0A1D6DBB8_WHEAT	A0A1D6DBB8	NA	Uncharacterized protein OS=Triticum aestivum PE=4 SV=1	878.45	0	12	tr|A0A1D6DBB8|A0A1D6DBB8_WHEAT	2.57292e+06	2.90466e+06	1.05097e+06	2.11432e+06	2.34362e+06	0.373802	0.170455	NA	NA	455900	683302	265573	647597
tr|A0A1D5ULE0|A0A1D5ULE0_WHEAT	A0A1D5ULE0	NA	Uncharacterized protein OS=Triticum aestivum PE=4 SV=1	1650.86	0	22	tr|A0A1D5ULE0|A0A1D5ULE0_WHEAT	3.51657e+06	3.26655e+06	3.651e+06	3.35894e+06	3.43775e+06	0.0493193	0.0887097	NA	NA	455580	485602	554655	447188
tr|A0A1D6REZ8|A0A1D6REZ8_WHEAT	A0A1D6REZ8	NA	Uncharacterized protein OS=Triticum aestivum PE=4 SV=1	439.04	0	5	tr|A0A1D6REZ8|A0A1D6REZ8_WHEAT	1.55077e+06	1.80435e+06	1.39996e+06	1.41686e+06	1.48381e+06	0.121095	0	NA	NA	454789	560550	392884	419521
tr|A0A1D5XNS2|A0A1D5XNS2_WHEAT	A0A1D5XNS2	NA	Uncharacterized protein OS=Triticum aestivum PE=3 SV=1	1916.76	0	19	tr|A0A1D5XNS2|A0A1D5XNS2_WHEAT	3.20529e+06	3.76392e+06	2.86166e+06	3.1078e+06	3.15655e+06	0.117884	0.117647	NA	NA	452911	599300	477317	533300
tr|A0A1D5TL88|A0A1D5TL88_WHEAT	A0A1D5TL88	NA	Glycosyltransferase OS=Triticum aestivum PE=3 SV=1	431.77	0	10	tr|A0A1D5TL88|A0A1D5TL88_WHEAT	1.61715e+06	1.64199e+06	1.04439e+06	1.65889e+06	1.62957e+06	0.199897	0.113636	NA	NA	451673	461466	309137	488367
tr|W5FB05|W5FB05_WHEAT	W5FB05	NA	Uncharacterized protein OS=Triticum aestivum PE=4 SV=1	874.53	0	13	tr|W5FB05|W5FB05_WHEAT	2.53406e+06	2.48205e+06	1.3566e+06	1.48026e+06	1.98116e+06	0.321648	0.0833333	NA	NA	449861	533826	344544	355347
tr|A0A1D5S0D0|A0A1D5S0D0_WHEAT	A0A1D5S0D0	NA	Uncharacterized protein OS=Triticum aestivum PE=4 SV=1	4084.51	0	69	tr|A0A1D5S0D0|A0A1D5S0D0_WHEAT	7.08114e+06	7.26628e+06	5.33344e+06	6.89283e+06	6.98699e+06	0.133445	0.0784884	NA	NA	449606	401480	393552	482904
tr|A0A1D5TP13|A0A1D5TP13_WHEAT	A0A1D5TP13	NA	Ribosomal protein L19 OS=Triticum aestivum PE=3 SV=1	361.49	0	3	tr|A0A1D5TP13|A0A1D5TP13_WHEAT	1.34579e+06	5.32288e+06	8.2924e+06	7.63899e+06	6.48094e+06	0.555683	0.1875	NA	NA	448596	1.77429e+06	2.76413e+06	2.54633e+06
tr|A0A1D5VST8|A0A1D5VST8_WHEAT	A0A1D5VST8	NA	Uncharacterized protein OS=Triticum aestivum PE=3 SV=1	78.66	0.00320684	1	tr|A0A1D5VST8|A0A1D5VST8_WHEAT	448421	270883	133767	413913	342398	0.455195	0.25	NA	NA	448421	270883	133767	413913
tr|A0A1D6RDN9|A0A1D6RDN9_WHEAT	A0A1D6RDN9	NA	Uncharacterized protein OS=Triticum aestivum PE=4 SV=1	1915.42	0	28	tr|A0A1D6RDN9|A0A1D6RDN9_WHEAT	3.65498e+06	3.50655e+06	2.47969e+06	3.90427e+06	3.58076e+06	0.184958	0.0769231	NA	NA	447913	489662	259878	460880
tr|A0A1D6DA96|A0A1D6DA96_WHEAT	A0A1D6DA96	NA	Uncharacterized protein OS=Triticum aestivum PE=4 SV=1	1637.06	0	25	tr|A0A1D6DA96|A0A1D6DA96_WHEAT	3.58339e+06	3.27023e+06	2.37718e+06	2.51656e+06	2.8934e+06	0.19845	0.0645161	NA	NA	447646	388017	346366	319078
tr|W5BNZ6|W5BNZ6_WHEAT	W5BNZ6	NA	Uncharacterized protein OS=Triticum aestivum PE=3 SV=1	111.88	0.00188324	2	tr|W5BNZ6|W5BNZ6_WHEAT	1.33923e+06	1.16653e+06	1.33881e+06	2.7493e+06	1.33902e+06	0.447918	0	NA	NA	446410	388845	446270	916434
tr|W5CUZ3|W5CUZ3_WHEAT	W5CUZ3	FVE	FVE OS=Triticum aestivum GN=FVE PE=4 SV=1	1071.05	0	18	tr|W5CUZ3|W5CUZ3_WHEAT	2.56795e+06	3.13999e+06	2.12387e+06	2.73049e+06	2.64922e+06	0.15914	0.08	NA	NA	445999	510254	406245	481494
tr|A0A1D5YHT3|A0A1D5YHT3_WHEAT	A0A1D5YHT3	NA	Non-specific lipid-transfer protein OS=Triticum aestivum PE=3 SV=1	269.35	0	3	tr|A0A1D5YHT3|A0A1D5YHT3_WHEAT	1.47077e+06	1.53619e+06	753823	754326	1.11255e+06	0.384038	0.05	NA	NA	444534	491827	246495	251185
tr|A0A1D5RRM2|A0A1D5RRM2_WHEAT	A0A1D5RRM2	NA	Uncharacterized protein OS=Triticum aestivum PE=4 SV=1	133.17	0	2	tr|A0A1D5RRM2|A0A1D5RRM2_WHEAT	888483	392008	668552	1.21967e+06	778518	0.441787	0.0833333	NA	NA	444242	196004	334276	609837
tr|A0A1D5XF01|A0A1D5XF01_WHEAT	A0A1D5XF01	NA	Uncharacterized protein OS=Triticum aestivum PE=4 SV=1	1795.62	0	21	tr|A0A1D5XF01|A0A1D5XF01_WHEAT	2.86363e+06	2.19083e+06	5.48669e+06	4.558e+06	3.71081e+06	0.401274	0.117647	NA	NA	442808	270981	903378	711312
tr|W5GM22|W5GM22_WHEAT	W5GM22	NA	Uncharacterized protein OS=Triticum aestivum PE=4 SV=1	1465.64	0	29	tr|W5GM22|W5GM22_WHEAT	2.77541e+06	1.32824e+06	1.78084e+06	2.10164e+06	1.94124e+06	0.304781	0.148649	NA	NA	442443	190503	205948	210643
tr|A0A1D5X8S0|A0A1D5X8S0_WHEAT	A0A1D5X8S0	NA	Uncharacterized protein OS=Triticum aestivum PE=4 SV=1	949.4	0	11	tr|A0A1D5X8S0|A0A1D5X8S0_WHEAT	1.90237e+06	2.95256e+06	1.70606e+06	2.44419e+06	2.17328e+06	0.249698	0.194444	NA	NA	440614	620358	297448	543861
tr|A0A1D6RJM6|A0A1D6RJM6_WHEAT	A0A1D6RJM6	NA	Peroxidase OS=Triticum aestivum PE=3 SV=1	69.18	0.00610066	1	tr|A0A1D6RJM6|A0A1D6RJM6_WHEAT	440381	390135	234863	244629	317382	0.315919	0	NA	NA	440381	390135	234863	244629
tr|A0A1D5RWG9|A0A1D5RWG9_WHEAT	A0A1D5RWG9	NA	Uncharacterized protein OS=Triticum aestivum PE=4 SV=1	2139.78	0	39	tr|A0A1D5RWG9|A0A1D5RWG9_WHEAT	4.015e+06	4.27463e+06	3.79667e+06	4.48419e+06	4.14482e+06	0.0724267	0.100962	NA	NA	437860	387994	484929	598076
tr|A0A1D5XKT5|A0A1D5XKT5_WHEAT	A0A1D5XKT5	NA	Uncharacterized protein OS=Triticum aestivum PE=4 SV=1	261.3	0	3	tr|A0A1D5XKT5|A0A1D5XKT5_WHEAT	1.30722e+06	1.46005e+06	1.2903e+06	1.30982e+06	1.30852e+06	0.0590815	0	NA	NA	435740	486685	430099	436607
tr|A0A1D5Y895|A0A1D5Y895_WHEAT	A0A1D5Y895	NA	UDP-glucose 6-dehydrogenase OS=Triticum aestivum PE=3 SV=1	140.23	0	1	tr|A0A1D5Y895|A0A1D5Y895_WHEAT	433944	211852	7271.16	14529.7	113191	1.20843	0	NA	NA	433944	211852	7271.16	14529.7
tr|A0A1D5VDS2|A0A1D5VDS2_WHEAT	A0A1D5VDS2	NA	Uncharacterized protein OS=Triticum aestivum PE=3 SV=1	512.51	0	8	tr|A0A1D5VDS2|A0A1D5VDS2_WHEAT	1.7774e+06	1.69877e+06	2.19825e+06	2.51454e+06	1.98783e+06	0.18609	0.0576923	NA	NA	428154	415092	585351	740330
tr|A0A1D5X1H4|A0A1D5X1H4_WHEAT	A0A1D5X1H4	NA	Uncharacterized protein OS=Triticum aestivum PE=4 SV=1	82.09	0.00273973	1	tr|A0A1D5X1H4|A0A1D5X1H4_WHEAT	427347	607493	468427	150778	447887	0.462787	0	NA	NA	427347	607493	468427	150778
tr|A0A1D5Z1A1|A0A1D5Z1A1_WHEAT	A0A1D5Z1A1	NA	Uncharacterized protein OS=Triticum aestivum PE=4 SV=1	601.44	0	10	tr|A0A1D5Z1A1|A0A1D5Z1A1_WHEAT	1.68153e+06	1.3416e+06	1.03279e+06	1.36651e+06	1.35406e+06	0.195518	0.140625	NA	NA	426673	294171	254703	387843
tr|A0A1D6RIA3|A0A1D6RIA3_WHEAT	A0A1D6RIA3	NA	Uncharacterized protein OS=Triticum aestivum PE=4 SV=1	966.5	0	11	tr|A0A1D6RIA3|A0A1D6RIA3_WHEAT	2.07794e+06	2.19201e+06	1.21041e+06	1.77038e+06	1.92416e+06	0.242309	0.09375	NA	NA	422685	450237	233241	338277
tr|A0A1D5XYB0|A0A1D5XYB0_WHEAT	A0A1D5XYB0	NA	Uncharacterized protein OS=Triticum aestivum PE=3 SV=1	506.14	0	6	tr|A0A1D5XYB0|A0A1D5XYB0_WHEAT	1.50473e+06	4.13748e+06	3.5282e+06	3.41105e+06	3.46962e+06	0.362175	0.0535714	NA	NA	421111	1.13772e+06	1.08704e+06	1.05405e+06
tr|A0A1D5WZ58|A0A1D5WZ58_WHEAT	A0A1D5WZ58	NA	Uncharacterized protein OS=Triticum aestivum PE=4 SV=1	918.6	0	8	tr|A0A1D5WZ58|A0A1D5WZ58_WHEAT	2.09178e+06	2.05941e+06	2.55208e+06	2.8074e+06	2.32193e+06	0.153211	0.138889	NA	NA	418829	523031	594062	778961
tr|A0A1D6S1E2|A0A1D6S1E2_WHEAT	A0A1D6S1E2	NA	Uncharacterized protein OS=Triticum aestivum PE=4 SV=1	1390.46	0	25	tr|A0A1D6S1E2|A0A1D6S1E2_WHEAT	2.64828e+06	2.73574e+06	1.39784e+06	1.19479e+06	2.02306e+06	0.406608	0.129032	NA	NA	418102	333047	264774	212455
tr|A0A1D6BBW5|A0A1D6BBW5_WHEAT	A0A1D6BBW5	NA	Uncharacterized protein OS=Triticum aestivum PE=4 SV=1	368.72	0	4	tr|A0A1D6BBW5|A0A1D6BBW5_WHEAT	1.25644e+06	1.6435e+06	1.26736e+06	1.21829e+06	1.2619e+06	0.147938	0.107143	NA	NA	416678	511008	422002	406064
tr|A0A1D6ACB2|A0A1D6ACB2_WHEAT	A0A1D6ACB2	NA	Uncharacterized protein OS=Triticum aestivum PE=4 SV=1	1761.67	0	27	tr|A0A1D6ACB2|A0A1D6ACB2_WHEAT	3.58513e+06	8.07757e+06	6.64519e+06	8.67422e+06	7.36138e+06	0.336886	0.111702	NA	NA	415706	829171	970307	1.26246e+06
tr|W5GUX3|W5GUX3_WHEAT	W5GUX3	NA	Uncharacterized protein OS=Triticum aestivum PE=4 SV=1	1508.51	0	22	tr|W5GUX3|W5GUX3_WHEAT	2.62496e+06	3.90104e+06	4.42389e+06	5.2609e+06	4.16247e+06	0.272505	0.104839	NA	NA	412844	573433	826243	959464
tr|A0A1D6BFQ2|A0A1D6BFQ2_WHEAT	A0A1D6BFQ2	NA	Uncharacterized protein OS=Triticum aestivum PE=4 SV=1	847.76	0	10	tr|A0A1D6BFQ2|A0A1D6BFQ2_WHEAT	1.49343e+06	1.9747e+06	1.46452e+06	2.33904e+06	1.73407e+06	0.230408	0.2	NA	NA	412687	544828	288574	579826
tr|A0A1D5ZXA6|A0A1D5ZXA6_WHEAT	A0A1D5ZXA6	NA	Uncharacterized protein OS=Triticum aestivum PE=3 SV=1	72.05	0.00568769	1	tr|A0A1D5ZXA6|A0A1D5ZXA6_WHEAT	412241	241283	219017	205268	230150	0.357549	0	NA	NA	412241	241283	219017	205268
tr|A0A1D5UAY3|A0A1D5UAY3_WHEAT	A0A1D5UAY3	NA	Uncharacterized protein OS=Triticum aestivum PE=4 SV=1	2687.93	0	37	tr|A0A1D5UAY3|A0A1D5UAY3_WHEAT	3.45854e+06	6.27298e+06	3.0374e+06	3.97423e+06	3.71639e+06	0.344795	0.149123	NA	NA	409034	654978	428286	572972
tr|A0A1D6A2R4|A0A1D6A2R4_WHEAT	A0A1D6A2R4	NA	Uncharacterized protein OS=Triticum aestivum PE=4 SV=1	56.72	0.00931966	1	tr|A0A1D6A2R4|A0A1D6A2R4_WHEAT	408536	585089	430494	998113	507792	0.451223	0	NA	NA	408536	585089	430494	998113
tr|W5FM70|W5FM70_WHEAT	W5FM70	NA	Uncharacterized protein OS=Triticum aestivum PE=4 SV=1	1031.46	0	15	tr|W5FM70|W5FM70_WHEAT	2.15899e+06	6.20007e+06	2.9614e+06	3.60237e+06	3.28188e+06	0.468795	0.107143	NA	NA	407741	989915	687838	708782
tr|A0A1D5U890|A0A1D5U890_WHEAT	A0A1D5U890	NA	Uncharacterized protein OS=Triticum aestivum PE=4 SV=1	56.22	0	1	tr|A0A1D5U890|A0A1D5U890_WHEAT	406110	277538	176349	101107	226943	0.549746	0	NA	NA	406110	277538	176349	101107
tr|W5HZE9|W5HZE9_WHEAT	W5HZE9	NA	Uncharacterized protein OS=Triticum aestivum PE=3 SV=1	749.67	0	12	tr|W5HZE9|W5HZE9_WHEAT	2.06082e+06	2.42404e+06	953547	1.55967e+06	1.81024e+06	0.364726	0.0833333	NA	NA	405061	466953	192137	412704
tr|A0A1D5RXY7|A0A1D5RXY7_WHEAT	A0A1D5RXY7	NA	Non-specific lipid-transfer protein OS=Triticum aestivum PE=3 SV=1	65.79	0.00697906	1	tr|A0A1D5RXY7|A0A1D5RXY7_WHEAT	404757	446.685	264116	241916	253016	0.736804	0	NA	NA	404757	446.685	264116	241916
tr|A0A1D6RD84|A0A1D6RD84_WHEAT	A0A1D6RD84	NA	Uncharacterized protein OS=Triticum aestivum PE=4 SV=1	627.84	0	9	tr|A0A1D6RD84|A0A1D6RD84_WHEAT	1.60325e+06	1.18318e+06	1.23833e+06	1.54341e+06	1.39087e+06	0.15226	0.0384615	NA	NA	404750	334603	331307	380810
tr|A0A1D6REG4|A0A1D6REG4_WHEAT	A0A1D6REG4	NA	Coatomer subunit delta OS=Triticum aestivum PE=3 SV=1	939.76	0	15	tr|A0A1D6REG4|A0A1D6REG4_WHEAT	1.92411e+06	1.02758e+06	2.13634e+06	3.44721e+06	2.03023e+06	0.468078	0.05	NA	NA	404124	155711	304075	855289
tr|A0A1D5X5P1|A0A1D5X5P1_WHEAT	A0A1D5X5P1	NA	Uncharacterized protein OS=Triticum aestivum PE=3 SV=1	1314.09	0	21	tr|A0A1D5X5P1|A0A1D5X5P1_WHEAT	2.2831e+06	1.35665e+06	884505	1.48167e+06	1.41916e+06	0.387002	0.241935	NA	NA	404058	273719	198239	361595
tr|A0A1D5Z8U2|A0A1D5Z8U2_WHEAT	A0A1D5Z8U2	NA	Uncharacterized protein OS=Triticum aestivum PE=3 SV=1	809.46	0	13	tr|A0A1D5Z8U2|A0A1D5Z8U2_WHEAT	1.67832e+06	1.77451e+06	1.41645e+06	1.71732e+06	1.69782e+06	0.0962362	0.220588	NA	NA	403917	435403	409108	500472
tr|W5FZU2|W5FZU2_WHEAT	W5FZU2	NA	Uncharacterized protein OS=Triticum aestivum PE=3 SV=1	1223.2	0	16	tr|W5FZU2|W5FZU2_WHEAT	2.29834e+06	2.95976e+06	2.50978e+06	2.26267e+06	2.40406e+06	0.127824	0.102273	NA	NA	403597	465318	445408	387891
tr|A0A1D5ZGS7|A0A1D5ZGS7_WHEAT	A0A1D5ZGS7	NA	Uncharacterized protein OS=Triticum aestivum PE=4 SV=1	498.95	0	6	tr|A0A1D5ZGS7|A0A1D5ZGS7_WHEAT	1.67097e+06	1.70373e+06	1.85902e+06	1.7547e+06	1.72922e+06	0.0470392	0.0277778	NA	NA	398135	398099	533515	546586
tr|A0A1D6BAW3|A0A1D6BAW3_WHEAT	A0A1D6BAW3	NA	Uncharacterized protein OS=Triticum aestivum PE=4 SV=1	1631.11	0	26	tr|A0A1D6BAW3|A0A1D6BAW3_WHEAT	2.58356e+06	2.37139e+06	2.75956e+06	3.11721e+06	2.67156e+06	0.116565	0.0984848	NA	NA	396014	492497	471413	461326
tr|A0A1D5YFW9|A0A1D5YFW9_WHEAT	A0A1D5YFW9	NA	Coatomer subunit alpha OS=Triticum aestivum PE=4 SV=1	81.92	0.00273673	1	tr|A0A1D5YFW9|A0A1D5YFW9_WHEAT	395001	169494	123631	174182	171838	0.564857	0	NA	NA	395001	169494	123631	174182
tr|A0A1D6BCC4|A0A1D6BCC4_WHEAT	A0A1D6BCC4	NA	Uncharacterized protein OS=Triticum aestivum PE=3 SV=1	2047.01	0	30	tr|A0A1D6BCC4|A0A1D6BCC4_WHEAT	3.4801e+06	4.81776e+06	4.23962e+06	5.25566e+06	4.52869e+06	0.172642	0.122093	NA	NA	392440	538394	520839	777278
tr|A0A1D5RP04|A0A1D5RP04_WHEAT	A0A1D5RP04	NA	Uncharacterized protein OS=Triticum aestivum PE=4 SV=1	700.31	0	13	tr|A0A1D5RP04|A0A1D5RP04_WHEAT	2.0881e+06	3.99314e+06	2.34978e+06	2.85141e+06	2.6006e+06	0.299017	0.078125	NA	NA	387353	704769	604980	726248
tr|A0A1D5U6A5|A0A1D5U6A5_WHEAT	A0A1D5U6A5	NA	DNA-directed RNA polymerase subunit beta OS=Triticum aestivum PE=3 SV=1	1841.4	0	29	tr|A0A1D5U6A5|A0A1D5U6A5_WHEAT	2.63283e+06	3.4456e+06	1.62901e+06	2.29082e+06	2.46182e+06	0.302415	0.1625	NA	NA	386266	357924	197832	281365
tr|W5B5G1|W5B5G1_WHEAT	W5B5G1	NA	Uncharacterized protein OS=Triticum aestivum PE=4 SV=1	891.59	0	12	tr|W5B5G1|W5B5G1_WHEAT	1.47461e+06	4.17048e+06	2.46814e+06	3.2739e+06	2.87102e+06	0.403625	0.2875	NA	NA	385988	1.08947e+06	643542	869494
tr|A0A1D5XVM7|A0A1D5XVM7_WHEAT	A0A1D5XVM7	NA	Uncharacterized protein OS=Triticum aestivum PE=4 SV=1	109.84	0.00186916	3	tr|A0A1D5XVM7|A0A1D5XVM7_WHEAT	1.14236e+06	1.20659e+06	279227	337106	739734	0.67637	0	NA	NA	380787	402196	93075.8	112369
tr|A0A1D6CWM0|A0A1D6CWM0_WHEAT	A0A1D6CWM0	NA	Uncharacterized protein OS=Triticum aestivum PE=3 SV=1	545.51	0	6	tr|A0A1D6CWM0|A0A1D6CWM0_WHEAT	1.24214e+06	1.42012e+06	372775	447197	844668	0.61756	0.15	NA	NA	379687	430689	107372	140187
tr|A0A1D6AGW3|A0A1D6AGW3_WHEAT	A0A1D6AGW3	NA	Coatomer subunit beta' OS=Triticum aestivum PE=3 SV=1	1667.93	0	28	tr|A0A1D6AGW3|A0A1D6AGW3_WHEAT	2.91417e+06	2.70171e+06	4.04222e+06	5.13409e+06	3.47819e+06	0.303852	0.125	NA	NA	378336	381497	789111	756324
tr|A0A1D6AV43|A0A1D6AV43_WHEAT	A0A1D6AV43	NA	Histone H2A OS=Triticum aestivum PE=3 SV=1	121.82	0.000653595	3	tr|A0A1D6AV43|A0A1D6AV43_WHEAT	1.13491e+06	857822	415246	529048	693435	0.44457	0.0833333	NA	NA	378302	285941	138415	176349
tr|A0A1D6BCF9|A0A1D6BCF9_WHEAT	A0A1D6BCF9	NA	Uncharacterized protein OS=Triticum aestivum PE=4 SV=1	932.69	0	9	tr|A0A1D6BCF9|A0A1D6BCF9_WHEAT	1.61718e+06	1.54665e+06	937346	2.32865e+06	1.58191e+06	0.35428	0.205882	NA	NA	378216	362480	220657	561324
tr|A0A1D5YVT2|A0A1D5YVT2_WHEAT	A0A1D5YVT2	NA	Uncharacterized protein OS=Triticum aestivum PE=4 SV=1	842.98	0	14	tr|A0A1D5YVT2|A0A1D5YVT2_WHEAT	1.67718e+06	746782	1.66309e+06	2.46219e+06	1.67014e+06	0.428361	0.102273	NA	NA	375429	181160	305769	527632
tr|A0A1D6A8W1|A0A1D6A8W1_WHEAT	A0A1D6A8W1	NA	Uncharacterized protein OS=Triticum aestivum PE=3 SV=1	222.65	0	3	tr|A0A1D6A8W1|A0A1D6A8W1_WHEAT	1.11973e+06	1.01303e+06	2.33944e+06	1.74657e+06	1.43315e+06	0.395674	0.28125	NA	NA	373242	337677	779812	582190
tr|W5GVP7|W5GVP7_WHEAT	W5GVP7	NA	Uncharacterized protein OS=Triticum aestivum PE=3 SV=1	210.13	0	2	tr|W5GVP7|W5GVP7_WHEAT	742483	3.93446e+06	5.18953e+06	5.95911e+06	4.56199e+06	0.581176	0	NA	NA	371242	1.96723e+06	2.59476e+06	2.97955e+06
tr|W5H7Z3|W5H7Z3_WHEAT	W5H7Z3	NA	Uncharacterized protein OS=Triticum aestivum PE=4 SV=1	80.89	0.00272628	2	tr|W5H7Z3|W5H7Z3_WHEAT	740616	2.85574e+06	22133.1	9412.08	381375	1.48115	0.25	NA	NA	370308	1.42787e+06	11066.5	4706.04
tr|A0A1D6S9A4|A0A1D6S9A4_WHEAT	A0A1D6S9A4	NA	Uncharacterized protein OS=Triticum aestivum PE=4 SV=1	966.9	0	14	tr|A0A1D6S9A4|A0A1D6S9A4_WHEAT	1.60928e+06	2.61527e+06	1.45378e+06	2.15382e+06	1.88155e+06	0.271239	0.113636	NA	NA	370189	583636	262606	394760
tr|W5AVW1|W5AVW1_WHEAT	W5AVW1	NA	Peroxidase OS=Triticum aestivum PE=3 SV=1	922.79	0	16	tr|W5AVW1|W5AVW1_WHEAT	2.24647e+06	2.49939e+06	1.17432e+06	1.66465e+06	1.95556e+06	0.313665	0.0978261	NA	NA	368778	346867	192371	280238
tr|W5B0Q9|W5B0Q9_WHEAT	W5B0Q9	NA	Xylose isomerase OS=Triticum aestivum PE=3 SV=1	141.63	0	1	tr|W5B0Q9|W5B0Q9_WHEAT	368426	534353	179775	240448	304437	0.474275	0	NA	NA	368426	534353	179775	240448
tr|A0A1D6RDC3|A0A1D6RDC3_WHEAT	A0A1D6RDC3	NA	Uncharacterized protein OS=Triticum aestivum PE=4 SV=1	834.84	0	11	tr|A0A1D6RDC3|A0A1D6RDC3_WHEAT	1.57393e+06	2.22885e+06	1.47721e+06	1.98931e+06	1.78162e+06	0.194248	0.144737	NA	NA	366147	559402	386865	552737
tr|A0A1D5RVB5|A0A1D5RVB5_WHEAT	A0A1D5RVB5	NA	Uncharacterized protein OS=Triticum aestivum PE=4 SV=1	64.44	0.00740741	2	tr|A0A1D5RVB5|A0A1D5RVB5_WHEAT	727355	831059	528431	663869	695612	0.184052	0	NA	NA	363678	415530	264215	331935
tr|W5ESS5|W5ESS5_WHEAT	W5ESS5	NA	Uncharacterized protein OS=Triticum aestivum PE=4 SV=1	1533.93	0	23	tr|W5ESS5|W5ESS5_WHEAT	2.55917e+06	3.42053e+06	1.89233e+06	2.61162e+06	2.5854e+06	0.238696	0.0859375	NA	NA	362205	489051	206042	318116
tr|Q9ZSR6|Q9ZSR6_WHEAT	Q9ZSR6	hsp26.6	Heat shock protein HSP26 OS=Triticum aestivum GN=hsp26.6 PE=2 SV=1	246.04	0	3	tr|Q9ZSR6|Q9ZSR6_WHEAT	1.08495e+06	1.86437e+06	425845	503996	794472	0.685638	0	NA	NA	361649	621457	141948	167999
tr|A0A1D6S1Y9|A0A1D6S1Y9_WHEAT	A0A1D6S1Y9	NA	Uncharacterized protein OS=Triticum aestivum PE=3 SV=1	459.58	0	5	tr|A0A1D6S1Y9|A0A1D6S1Y9_WHEAT	1.39273e+06	742161	1.64645e+06	1.01646e+06	1.20459e+06	0.333405	0	NA	NA	360598	194295	517905	302778
tr|A0A0C4BIR4|A0A0C4BIR4_WHEAT	A0A0C4BIR4	NA	Uncharacterized protein OS=Triticum aestivum PE=4 SV=1	992.52	0	13	tr|A0A0C4BIR4|A0A0C4BIR4_WHEAT	2.44065e+06	2.64552e+06	1.94974e+06	2.74729e+06	2.54308e+06	0.144918	0.130952	NA	NA	360135	361172	360372	563388
tr|A0A1D6REH6|A0A1D6REH6_WHEAT	A0A1D6REH6	NA	Uncharacterized protein OS=Triticum aestivum PE=4 SV=1	1386.24	0	17	tr|A0A1D6REH6|A0A1D6REH6_WHEAT	2.09096e+06	2.42128e+06	2.86123e+06	2.46171e+06	2.4415e+06	0.128326	0.192308	NA	NA	358833	592593	291143	345071
tr|A0A1D5WCH9|A0A1D5WCH9_WHEAT	A0A1D5WCH9	NA	Uncharacterized protein OS=Triticum aestivum PE=4 SV=1	286.54	0	5	tr|A0A1D5WCH9|A0A1D5WCH9_WHEAT	1.0922e+06	1.02332e+06	2.37774e+06	466451	1.05776e+06	0.652155	0.21875	NA	NA	358273	322573	784549	146062
tr|W4ZP94|W4ZP94_WHEAT	W4ZP94	NA	FRIGIDA-like protein OS=Triticum aestivum PE=3 SV=1	1072	0	15	tr|W4ZP94|W4ZP94_WHEAT	1.69381e+06	2.26939e+06	2.34048e+06	2.44147e+06	2.30494e+06	0.153605	0.130435	NA	NA	357873	373240	498739	511820
tr|A0A059PIR9|A0A059PIR9_AEQVI	A0A059PIR9	yfp	Yellow fluorescent protein (Fragment) OS=Aequorea victoria GN=yfp PE=4 SV=1	22.38	0.00531915	1	tr|A0A059PIR9|A0A059PIR9_AEQVI	357573	301556	19305.5	6395.46	160431	1.07679	0	NA	NA	357573	301556	19305.5	6395.46
tr|A0A1D6CXK1|A0A1D6CXK1_WHEAT	A0A1D6CXK1	NA	Uncharacterized protein OS=Triticum aestivum PE=3 SV=1	1476.18	0	19	tr|A0A1D6CXK1|A0A1D6CXK1_WHEAT	2.36411e+06	3.48806e+06	4.52625e+06	6.36861e+06	4.00715e+06	0.406416	0.141667	NA	NA	356528	652097	967425	1.60171e+06
tr|A0A1D6AML5|A0A1D6AML5_WHEAT	A0A1D6AML5	NA	Uncharacterized protein OS=Triticum aestivum PE=4 SV=1	230.3	0	4	tr|A0A1D6AML5|A0A1D6AML5_WHEAT	1.06847e+06	1.20285e+06	152446	166970	617722	0.874132	0.166667	NA	NA	354719	375955	50805.1	55586.2
tr|A0A0C4BK99|A0A0C4BK99_WHEAT	A0A0C4BK99	NA	Uncharacterized protein OS=Triticum aestivum PE=4 SV=1	1345.07	0	15	tr|A0A0C4BK99|A0A0C4BK99_WHEAT	2.33945e+06	8.21708e+06	5.04922e+06	6.70804e+06	5.87863e+06	0.451245	0.0862069	NA	NA	354536	1.40043e+06	870229	1.34848e+06
tr|A0A1D5WZ74|A0A1D5WZ74_WHEAT	A0A1D5WZ74	NA	UDP-glucose 6-dehydrogenase OS=Triticum aestivum PE=3 SV=1	535.8	0	8	tr|A0A1D5WZ74|A0A1D5WZ74_WHEAT	1.25196e+06	1.04991e+06	1.07482e+06	1.33467e+06	1.16339e+06	0.1171	0.0909091	NA	NA	353875	227262	344604	408084
tr|A0A1D6BTI2|A0A1D6BTI2_WHEAT	A0A1D6BTI2	NA	Uncharacterized protein OS=Triticum aestivum PE=3 SV=1	1759.94	0	26	tr|A0A1D6BTI2|A0A1D6BTI2_WHEAT	3.04526e+06	1.9612e+06	2.7809e+06	3.6194e+06	2.91308e+06	0.241668	0.0608108	NA	NA	353352	245135	289852	617766
tr|W5BGF3|W5BGF3_WHEAT	W5BGF3	NA	Uncharacterized protein OS=Triticum aestivum PE=4 SV=1	182.18	0	3	tr|W5BGF3|W5BGF3_WHEAT	1.05072e+06	1.33441e+06	146898	113967	598808	0.943628	0.1	NA	NA	350240	444804	48966	37988.9
tr|A0A1D5RZX1|A0A1D5RZX1_WHEAT	A0A1D5RZX1	NA	ATP synthase subunit gamma OS=Triticum aestivum PE=3 SV=1	1659.13	0	19	tr|A0A1D5RZX1|A0A1D5RZX1_WHEAT	2.59009e+06	2.99075e+06	3.35287e+06	3.6294e+06	3.17181e+06	0.143512	0.143939	NA	NA	350235	401707	414646	683379
tr|W5FER5|W5FER5_WHEAT	W5FER5	NA	Uncharacterized protein OS=Triticum aestivum PE=4 SV=1	371.02	0	5	tr|W5FER5|W5FER5_WHEAT	1.1194e+06	1.06748e+06	783692	896818	982148	0.160065	0	NA	NA	349668	322562	235936	265967
tr|W5ES03|W5ES03_WHEAT	W5ES03	NA	DNA polymerase OS=Triticum aestivum PE=3 SV=1	664.61	0	13	tr|W5ES03|W5ES03_WHEAT	1.41663e+06	1.20268e+06	906290	1.58943e+06	1.30965e+06	0.230237	0.0714286	NA	NA	348993	337901	222860	353188
tr|W5H440|W5H440_WHEAT	W5H440	NA	Uncharacterized protein OS=Triticum aestivum PE=4 SV=1	146.61	0	1	tr|W5H440|W5H440_WHEAT	348360	778358	541114	1.01987e+06	659736	0.433218	0	NA	NA	348360	778358	541114	1.01987e+06
tr|A0A1D5ZVH4|A0A1D5ZVH4_WHEAT	A0A1D5ZVH4	NA	Lipoxygenase OS=Triticum aestivum PE=3 SV=1	2618.54	0	42	tr|A0A1D5ZVH4|A0A1D5ZVH4_WHEAT	5.19529e+06	4.03203e+06	4.26152e+06	5.30783e+06	4.7284e+06	0.137541	0.0474138	NA	NA	347630	401811	427374	658053
tr|A0A1D5RR29|A0A1D5RR29_WHEAT	A0A1D5RR29	NA	DNA ligase OS=Triticum aestivum PE=3 SV=1	1720.85	0	27	tr|A0A1D5RR29|A0A1D5RR29_WHEAT	3.00447e+06	3.14065e+06	2.76944e+06	3.26231e+06	3.07256e+06	0.0694118	0.0789474	NA	NA	346971	355048	415351	468579
tr|A0A1D6RWY4|A0A1D6RWY4_WHEAT	A0A1D6RWY4	NA	Uncharacterized protein OS=Triticum aestivum PE=4 SV=1	1409.45	0	21	tr|A0A1D6RWY4|A0A1D6RWY4_WHEAT	2.23443e+06	2.59891e+06	4.26305e+06	5.27039e+06	3.43098e+06	0.3969	0.202703	NA	NA	346861	377503	579182	1.13383e+06
tr|A0A1D5V0C7|A0A1D5V0C7_WHEAT	A0A1D5V0C7	NA	Uncharacterized protein OS=Triticum aestivum PE=4 SV=1	280.89	0	3	tr|A0A1D5V0C7|A0A1D5V0C7_WHEAT	1.03669e+06	1.28235e+06	290071	273676	663380	0.716783	0.2	NA	NA	345563	427451	96690.4	91225.4
tr|A0A1D5Y336|A0A1D5Y336_WHEAT	A0A1D5Y336	NA	Tubulin beta chain OS=Triticum aestivum PE=3 SV=1	434.42	0	5	tr|A0A1D5Y336|A0A1D5Y336_WHEAT	1.20148e+06	1.10034e+06	271171	536261	818298	0.574637	0.214286	NA	NA	344404	359401	89729.6	172655
tr|W5DWP7|W5DWP7_WHEAT	W5DWP7	NA	Uncharacterized protein OS=Triticum aestivum PE=3 SV=1	507.51	0	6	tr|W5DWP7|W5DWP7_WHEAT	1.45663e+06	1.15722e+06	1.0862e+06	1.07889e+06	1.12171e+06	0.149098	0.0277778	NA	NA	342277	222704	289200	283561
tr|Q5I7K7|Q5I7K7_WHEAT	Q5I7K7	NA	Ribosomal protein L39 OS=Triticum aestivum PE=1 SV=1	247.59	0	4	tr|Q5I7K7|Q5I7K7_WHEAT	1.04924e+06	3.36016e+06	666378	510306	857807	0.951314	0.15625	NA	NA	341089	1.10561e+06	221111	169975
tr|W5A3C9|W5A3C9_WHEAT	W5A3C9	NA	Poly [ADP-ribose] polymerase OS=Triticum aestivum PE=4 SV=1	1278.19	0	19	tr|W5A3C9|W5A3C9_WHEAT	1.56608e+06	2.41854e+06	1.28859e+06	1.55099e+06	1.55854e+06	0.288258	0.0833333	NA	NA	340865	508490	246607	281788
tr|A0A1D6AZX2|A0A1D6AZX2_WHEAT	A0A1D6AZX2	NA	Uncharacterized protein OS=Triticum aestivum PE=4 SV=1	205.47	0	4	tr|A0A1D6AZX2|A0A1D6AZX2_WHEAT	1.05953e+06	1.25929e+06	1.27853e+06	1.038e+06	1.15941e+06	0.110148	0.208333	NA	NA	340178	419753	322897	318711
tr|A0A1D6RVU9|A0A1D6RVU9_WHEAT	A0A1D6RVU9	NA	Uncharacterized protein OS=Triticum aestivum PE=4 SV=1	1436.34	0	21	tr|A0A1D6RVU9|A0A1D6RVU9_WHEAT	2.30488e+06	3.47505e+06	1.32604e+06	1.71658e+06	2.01073e+06	0.424837	0.16129	NA	NA	339893	424887	187462	309660
tr|A0A1D6BNN1|A0A1D6BNN1_WHEAT	A0A1D6BNN1	NA	Uncharacterized protein OS=Triticum aestivum PE=4 SV=1	725.14	0	13	tr|A0A1D6BNN1|A0A1D6BNN1_WHEAT	2.24469e+06	2.15235e+06	290096	399410	1.27588e+06	0.842903	0.223684	NA	NA	339069	584178	57910.5	78067.7
tr|W5AUU7|W5AUU7_WHEAT	W5AUU7	NA	Uncharacterized protein OS=Triticum aestivum PE=4 SV=1	380.82	0	4	tr|W5AUU7|W5AUU7_WHEAT	1.17553e+06	1.34523e+06	1.18052e+06	1.73787e+06	1.26287e+06	0.19422	0	NA	NA	337700	372930	354449	504581
tr|A0A1D6D5M0|A0A1D6D5M0_WHEAT	A0A1D6D5M0	NA	Uncharacterized protein OS=Triticum aestivum PE=4 SV=1	85.63	0.00223714	1	tr|A0A1D6D5M0|A0A1D6D5M0_WHEAT	336635	262901	77263.5	111271	187086	0.625273	0	NA	NA	336635	262901	77263.5	111271
tr|A0A1D5XZE8|A0A1D5XZE8_WHEAT	A0A1D5XZE8	NA	Uncharacterized protein OS=Triticum aestivum PE=4 SV=1	65.5	0.00696517	1	tr|A0A1D5XZE8|A0A1D5XZE8_WHEAT	335698	140868	156801	185297	171049	0.436159	0.125	NA	NA	335698	140868	156801	185297
tr|A0A1D5YCL7|A0A1D5YCL7_WHEAT	A0A1D5YCL7	NA	Uncharacterized protein OS=Triticum aestivum PE=4 SV=1	880.04	0	13	tr|A0A1D5YCL7|A0A1D5YCL7_WHEAT	1.72123e+06	1.11868e+06	1.27958e+06	1.72122e+06	1.5004e+06	0.211281	0.0921053	NA	NA	335642	229266	268941	349266
tr|W5FIY8|W5FIY8_WHEAT	W5FIY8	NA	Uncharacterized protein OS=Triticum aestivum PE=4 SV=1	398.9	0	6	tr|W5FIY8|W5FIY8_WHEAT	1.22664e+06	2.09046e+06	1.1437e+06	1.2099e+06	1.21827e+06	0.317386	0.03125	NA	NA	335276	589928	329076	341919
tr|A0A1D6CFV1|A0A1D6CFV1_WHEAT	A0A1D6CFV1	NA	Uncharacterized protein OS=Triticum aestivum PE=4 SV=1	461.41	0	5	tr|A0A1D6CFV1|A0A1D6CFV1_WHEAT	1.11466e+06	1.17739e+06	277132	306468	710564	0.687144	0.15625	NA	NA	335172	372801	86952.8	96484.8
tr|W5C334|W5C334_WHEAT	W5C334	NA	Elongator complex protein 1 OS=Triticum aestivum PE=3 SV=1	1680.62	0	31	tr|W5C334|W5C334_WHEAT	2.68171e+06	2.32973e+06	1.07977e+06	2.12008e+06	2.22491e+06	0.335562	0.151316	NA	NA	333932	383026	142463	283629
tr|A0A1D5ZNY3|A0A1D5ZNY3_WHEAT	A0A1D5ZNY3	NA	Uncharacterized protein OS=Triticum aestivum PE=4 SV=1	632.38	0	10	tr|A0A1D5ZNY3|A0A1D5ZNY3_WHEAT	1.19408e+06	1.04424e+06	1.78846e+06	2.04215e+06	1.49127e+06	0.313159	0.160714	NA	NA	331455	169608	539094	630646
tr|A0A1D6A982|A0A1D6A982_WHEAT	A0A1D6A982	NA	Uncharacterized protein OS=Triticum aestivum PE=3 SV=1	647.83	0	11	tr|A0A1D6A982|A0A1D6A982_WHEAT	1.5955e+06	1.88907e+06	966818	1.53884e+06	1.56717e+06	0.257544	0	NA	NA	330996	393497	191900	337553
tr|A0A1D5RSC7|A0A1D5RSC7_WHEAT	A0A1D5RSC7	NA	Alpha-galactosidase OS=Triticum aestivum PE=3 SV=1	743.37	0	12	tr|A0A1D5RSC7|A0A1D5RSC7_WHEAT	1.37559e+06	1.1699e+06	929112	761900	1.04951e+06	0.254323	0.21875	NA	NA	330970	279452	209721	168174
tr|A0A1D5XZV5|A0A1D5XZV5_WHEAT	A0A1D5XZV5	NA	Uncharacterized protein OS=Triticum aestivum PE=4 SV=1	1091.94	0	16	tr|A0A1D5XZV5|A0A1D5XZV5_WHEAT	1.65009e+06	1.92232e+06	1.31258e+06	1.79496e+06	1.72252e+06	0.157456	0.1	NA	NA	330445	441600	249946	344818
tr|W5FSM8|W5FSM8_WHEAT	W5FSM8	NA	Uncharacterized protein OS=Triticum aestivum PE=3 SV=1	101.49	0.0018018	2	tr|W5FSM8|W5FSM8_WHEAT	660805	463278	1.08504e+06	1.45768e+06	872921	0.484617	0.0833333	NA	NA	330403	231639	542519	728839
tr|W5AYI1|W5AYI1_WHEAT	W5AYI1	NA	Uncharacterized protein OS=Triticum aestivum PE=4 SV=1	496.67	0	9	tr|W5AYI1|W5AYI1_WHEAT	1.2455e+06	924735	569459	1.17594e+06	1.05034e+06	0.312352	0.104167	NA	NA	330162	208944	149818	340900
tr|W5EF79|W5EF79_WHEAT	W5EF79	NA	Uncharacterized protein OS=Triticum aestivum PE=3 SV=1	175.24	0	3	tr|W5EF79|W5EF79_WHEAT	989240	1.48841e+06	834763	925376	957308	0.276479	0	NA	NA	329747	496137	278254	308459
tr|A0A1D5SG43|A0A1D5SG43_WHEAT	A0A1D5SG43	NA	Uncharacterized protein OS=Triticum aestivum PE=4 SV=1	480.05	0	8	tr|A0A1D5SG43|A0A1D5SG43_WHEAT	1.22913e+06	1.07003e+06	2.61939e+06	1.09654e+06	1.16284e+06	0.496748	0.0227273	NA	NA	328498	289719	811312	320838
tr|A0A1D5SRA5|A0A1D5SRA5_WHEAT	A0A1D5SRA5	NA	Coatomer subunit gamma OS=Triticum aestivum PE=3 SV=1	1611.51	0	23	tr|A0A1D5SRA5|A0A1D5SRA5_WHEAT	2.54463e+06	2.22688e+06	2.14814e+06	2.91049e+06	2.38575e+06	0.141287	0.0806452	NA	NA	328286	309081	342666	428722
tr|A0A1D6RLT3|A0A1D6RLT3_WHEAT	A0A1D6RLT3	NA	Uncharacterized protein OS=Triticum aestivum PE=4 SV=1	2336.32	0	38	tr|A0A1D6RLT3|A0A1D6RLT3_WHEAT	2.61484e+06	1.91344e+06	2.74108e+06	4.17688e+06	2.67796e+06	0.331796	0.134615	NA	NA	322288	155921	263663	443204
tr|A0A1D5XIA9|A0A1D5XIA9_WHEAT	A0A1D5XIA9	NA	Phosphoserine aminotransferase OS=Triticum aestivum PE=3 SV=1	586.54	0	9	tr|A0A1D5XIA9|A0A1D5XIA9_WHEAT	1.29632e+06	1.25041e+06	568275	704838	977625	0.389897	0.0227273	NA	NA	321393	276239	136744	193129
tr|A0A1D5SJ72|A0A1D5SJ72_WHEAT	A0A1D5SJ72	NA	Uncharacterized protein OS=Triticum aestivum PE=4 SV=1	1292.01	0	18	tr|A0A1D5SJ72|A0A1D5SJ72_WHEAT	2.0764e+06	2.39942e+06	1.46948e+06	2.04981e+06	2.0631e+06	0.193617	0.197917	NA	NA	321118	377263	262976	422842
tr|A0A1D6S8H9|A0A1D6S8H9_WHEAT	A0A1D6S8H9	NA	DNA-directed RNA polymerase subunit beta OS=Triticum aestivum PE=3 SV=1	1562.72	0	25	tr|A0A1D6S8H9|A0A1D6S8H9_WHEAT	2.49144e+06	2.55374e+06	1.39859e+06	1.96975e+06	2.2306e+06	0.25573	0.128788	NA	NA	320142	340681	198320	261624
tr|A0A1D6BRU1|A0A1D6BRU1_WHEAT	A0A1D6BRU1	NA	Uncharacterized protein OS=Triticum aestivum PE=4 SV=1	81.31	0.00272926	1	tr|A0A1D6BRU1|A0A1D6BRU1_WHEAT	316888	348997	143208	201760	259324	0.382127	0	NA	NA	316888	348997	143208	201760
tr|A0A077RX64|A0A077RX64_WHEAT	A0A077RX64	TRAES_3BF066700110CFD_c1	Uncharacterized protein OS=Triticum aestivum GN=TRAES_3BF066700110CFD_c1 PE=3 SV=1	176.82	0	3	tr|A0A077RX64|A0A077RX64_WHEAT	949567	1.71152e+06	588820	239062	769194	0.722554	0.0833333	NA	NA	316522	570508	196273	79687.4
tr|A0A1D5SG34|A0A1D5SG34_WHEAT	A0A1D5SG34	NA	Uncharacterized protein OS=Triticum aestivum PE=3 SV=1	927.9	0	15	tr|A0A1D5SG34|A0A1D5SG34_WHEAT	1.79744e+06	2.03009e+06	1.02961e+06	1.13803e+06	1.46773e+06	0.32726	0.1125	NA	NA	315857	355824	137152	200363
tr|A0A1D5XUI4|A0A1D5XUI4_WHEAT	A0A1D5XUI4	NA	Uncharacterized protein OS=Triticum aestivum PE=3 SV=1	1619.73	0	27	tr|A0A1D5XUI4|A0A1D5XUI4_WHEAT	2.56839e+06	2.70038e+06	6.76854e+06	5.97119e+06	4.33579e+06	0.48461	0.0882353	NA	NA	313115	386013	974043	921123
tr|A0A1D5V3W0|A0A1D5V3W0_WHEAT	A0A1D5V3W0	NA	Oleosin OS=Triticum aestivum PE=3 SV=1	63.89	0.00738552	1	tr|A0A1D5V3W0|A0A1D5V3W0_WHEAT	312996	307877	846403	977136	579699	0.574804	0	NA	NA	312996	307877	846403	977136
tr|A0A1D6RRI4|A0A1D6RRI4_WHEAT	A0A1D6RRI4	NA	Uncharacterized protein OS=Triticum aestivum PE=3 SV=1	283.74	0	10	tr|A0A1D6RRI4|A0A1D6RRI4_WHEAT	1.5951e+06	1.6925e+06	174795	174262	884946	0.934062	0.15	NA	NA	311928	325299	55675.2	52937.6
sp|P62786|H42_WHEAT	P62786	NA	Histone H4 variant TH091 OS=Triticum aestivum PE=3 SV=2	787.15	0	10	sp|P62786|H42_WHEAT	1.60673e+06	1.90386e+06	2.86617e+06	1.37225e+06	1.7553e+06	0.338817	0.171875	NA	NA	311779	404461	831186	381923
tr|A0A1D5UJJ0|A0A1D5UJJ0_WHEAT	A0A1D5UJJ0	NA	Uncharacterized protein OS=Triticum aestivum PE=4 SV=1	369.38	0	6	tr|A0A1D5UJJ0|A0A1D5UJJ0_WHEAT	1.0293e+06	322307	2.2585e+06	2.48116e+06	1.6439e+06	0.672299	0.111111	NA	NA	310666	106120	733964	791171
tr|A0A1D5Y2X1|A0A1D5Y2X1_WHEAT	A0A1D5Y2X1	NA	Uncharacterized protein OS=Triticum aestivum PE=4 SV=1	91.49	0.00172117	1	tr|A0A1D5Y2X1|A0A1D5Y2X1_WHEAT	310050	690431	836948	1.48387e+06	763690	0.58895	0	NA	NA	310050	690431	836948	1.48387e+06
tr|A0A077RRC4|A0A077RRC4_WHEAT	A0A077RRC4	TRAES_3BF008800140CFD_c1	Peroxidase OS=Triticum aestivum GN=TRAES_3BF008800140CFD_c1 PE=3 SV=1	508.78	0	6	tr|A0A077RRC4|A0A077RRC4_WHEAT	1.11652e+06	1.03913e+06	1.0827e+06	1.26228e+06	1.09961e+06	0.0859861	0.025	NA	NA	309595	285652	309909	365479
tr|W5HIU8|W5HIU8_WHEAT	W5HIU8	NA	Uncharacterized protein OS=Triticum aestivum PE=4 SV=1	284.38	0	5	tr|W5HIU8|W5HIU8_WHEAT	936992	3.23463e+06	2.88655e+06	2.88169e+06	2.88412e+06	0.420581	0.107143	NA	NA	309116	1.05905e+06	917819	919639
tr|A0A1D5XMY4|A0A1D5XMY4_WHEAT	A0A1D5XMY4	NA	Uncharacterized protein OS=Triticum aestivum PE=3 SV=1	272.37	0	5	tr|A0A1D5XMY4|A0A1D5XMY4_WHEAT	977311	877106	740672	491955	808889	0.27242	0.0833333	NA	NA	308197	287691	205822	129374
tr|A0A1D5RPW7|A0A1D5RPW7_WHEAT	A0A1D5RPW7	NA	Uncharacterized protein OS=Triticum aestivum PE=4 SV=1	873.22	0	12	tr|A0A1D5RPW7|A0A1D5RPW7_WHEAT	1.93658e+06	2.04806e+06	1.17879e+06	2.27986e+06	1.99232e+06	0.256145	0.0416667	NA	NA	307565	392334	158001	419939
tr|A0A1D6BTL4|A0A1D6BTL4_WHEAT	A0A1D6BTL4	NA	Uncharacterized protein OS=Triticum aestivum PE=4 SV=1	559.07	0	7	tr|A0A1D6BTL4|A0A1D6BTL4_WHEAT	1.54101e+06	1.71558e+06	785848	935582	1.2383e+06	0.364001	0.0576923	NA	NA	306578	338632	167796	233495
tr|A0A1D5U305|A0A1D5U305_WHEAT	A0A1D5U305	NA	Superoxide dismutase OS=Triticum aestivum PE=3 SV=1	188.98	0	1	tr|A0A1D5U305|A0A1D5U305_WHEAT	306006	227537	246595	321904	276300	0.16527	0.375	NA	NA	306006	227537	246595	321904
tr|W5DZD4|W5DZD4_WHEAT	W5DZD4	NA	Uncharacterized protein OS=Triticum aestivum PE=3 SV=1	1818.56	0	23	tr|W5DZD4|W5DZD4_WHEAT	2.39513e+06	2.09662e+06	1.34432e+06	1.6334e+06	1.86501e+06	0.251066	0.0808824	NA	NA	305851	293753	178283	224071
tr|A0A1D5TM21|A0A1D5TM21_WHEAT	A0A1D5TM21	NA	Glycosyltransferase OS=Triticum aestivum PE=3 SV=1	852.69	0	14	tr|A0A1D5TM21|A0A1D5TM21_WHEAT	1.64949e+06	2.03887e+06	1.4264e+06	1.53414e+06	1.59181e+06	0.160693	0.0833333	NA	NA	305041	301910	359791	373768
tr|A0A1D5ZPQ1|A0A1D5ZPQ1_WHEAT	A0A1D5ZPQ1	NA	Mitochondrial Rho GTPase OS=Triticum aestivum PE=3 SV=1	950.12	0	18	tr|A0A1D5ZPQ1|A0A1D5ZPQ1_WHEAT	1.80358e+06	1.78371e+06	2.62367e+06	2.36858e+06	2.08608e+06	0.195262	0.0375	NA	NA	303806	331917	602223	577100
tr|A0A1D6B458|A0A1D6B458_WHEAT	A0A1D6B458	NA	Uncharacterized protein OS=Triticum aestivum PE=4 SV=1	1040.49	0	18	tr|A0A1D6B458|A0A1D6B458_WHEAT	1.45821e+06	1.22272e+06	887591	1.14234e+06	1.18253e+06	0.199811	0.0375	NA	NA	303774	193398	190122	254471
tr|A0A1D5UTZ7|A0A1D5UTZ7_WHEAT	A0A1D5UTZ7	NA	Uncharacterized protein OS=Triticum aestivum PE=4 SV=1	462.65	0	7	tr|A0A1D5UTZ7|A0A1D5UTZ7_WHEAT	1.08216e+06	1.34706e+06	2.34127e+06	1.71192e+06	1.52949e+06	0.336553	0	NA	NA	302539	413431	532413	419617
tr|A0A0C4BJE5|A0A0C4BJE5_WHEAT	A0A0C4BJE5	NA	Serine hydroxymethyltransferase OS=Triticum aestivum PE=3 SV=1	1642.41	0	24	tr|A0A0C4BJE5|A0A0C4BJE5_WHEAT	2.60067e+06	4.13722e+06	2.08687e+06	2.20916e+06	2.40491e+06	0.342552	0.1875	NA	NA	302093	431986	276176	341446
tr|A0A1D5VZN3|A0A1D5VZN3_WHEAT	A0A1D5VZN3	NA	Uncharacterized protein OS=Triticum aestivum PE=3 SV=1	91	0.00171723	1	tr|A0A1D5VZN3|A0A1D5VZN3_WHEAT	300984	271609	151304	230960	251284	0.272134	0	NA	NA	300984	271609	151304	230960
tr|A0A1D5XSI8|A0A1D5XSI8_WHEAT	A0A1D5XSI8	NA	Uncharacterized protein OS=Triticum aestivum PE=4 SV=1	712.69	0	12	tr|A0A1D5XSI8|A0A1D5XSI8_WHEAT	1.48097e+06	2.65653e+06	868283	1.24937e+06	1.36517e+06	0.493062	0.0625	NA	NA	299129	502089	207725	263715
tr|A0A1D5RQ61|A0A1D5RQ61_WHEAT	A0A1D5RQ61	NA	Uncharacterized protein OS=Triticum aestivum PE=4 SV=1	1450.23	0	23	tr|A0A1D5RQ61|A0A1D5RQ61_WHEAT	2.5148e+06	2.0391e+06	2.0785e+06	2.76294e+06	2.29665e+06	0.14912	0.0833333	NA	NA	298869	247405	270967	388002
tr|A0A1D5YMW6|A0A1D5YMW6_WHEAT	A0A1D5YMW6	NA	Uncharacterized protein OS=Triticum aestivum PE=3 SV=1	303.14	0	4	tr|A0A1D5YMW6|A0A1D5YMW6_WHEAT	904077	1.45386e+06	1.79402e+06	1.78213e+06	1.61799e+06	0.281235	0	NA	NA	298550	482104	583185	582494
tr|A0A1D6CF77|A0A1D6CF77_WHEAT	A0A1D6CF77	NA	Uncharacterized protein OS=Triticum aestivum PE=4 SV=1	207.26	0	2	tr|A0A1D6CF77|A0A1D6CF77_WHEAT	895555	1.19824e+06	366839	539826	717690	0.49469	0.0833333	NA	NA	298518	399412	122280	179942
sp|P11515|CBP3_WHEAT	P11515	CBP3	Serine carboxypeptidase 3 OS=Triticum aestivum GN=CBP3 PE=2 SV=1	591.38	0	7	sp|P11515|CBP3_WHEAT	1.17143e+06	1.84458e+06	619908	1.13511e+06	1.15327e+06	0.421094	0.125	NA	NA	298249	529734	173479	322095
tr|A0A1D6RQI3|A0A1D6RQI3_WHEAT	A0A1D6RQI3	NA	Uncharacterized protein OS=Triticum aestivum PE=4 SV=1	2270.4	0	33	tr|A0A1D6RQI3|A0A1D6RQI3_WHEAT	2.80884e+06	3.22143e+06	4.48038e+06	6.29011e+06	3.8509e+06	0.37241	0.0943396	NA	NA	297862	283015	584510	740152
tr|A0A1D6AC46|A0A1D6AC46_WHEAT	A0A1D6AC46	NA	Uncharacterized protein OS=Triticum aestivum PE=4 SV=1	793.98	0	8	tr|A0A1D6AC46|A0A1D6AC46_WHEAT	1.5584e+06	1.85341e+06	1.00599e+06	1.60264e+06	1.58052e+06	0.23733	0.0384615	NA	NA	297742	382729	249441	478135
tr|A0A1D5Z6F8|A0A1D5Z6F8_WHEAT	A0A1D5Z6F8	NA	Uncharacterized protein OS=Triticum aestivum PE=4 SV=1	1239.01	0	18	tr|A0A1D5Z6F8|A0A1D5Z6F8_WHEAT	2.24356e+06	1.871e+06	1.34328e+06	1.54561e+06	1.7083e+06	0.224967	0.0862069	NA	NA	296595	257733	169494	217205
tr|A0A1D5XSS6|A0A1D5XSS6_WHEAT	A0A1D5XSS6	NA	Uncharacterized protein OS=Triticum aestivum PE=3 SV=1	243.84	0	6	tr|A0A1D5XSS6|A0A1D5XSS6_WHEAT	950048	1.5015e+06	374974	483802	716925	0.620936	0.0833333	NA	NA	296244	473381	121925	150454
tr|W5C5U5|W5C5U5_WHEAT	W5C5U5	NA	Uncharacterized protein OS=Triticum aestivum PE=4 SV=1	394.69	0	4	tr|W5C5U5|W5C5U5_WHEAT	904108	808733	3.43636e+06	4.26231e+06	2.17023e+06	0.748438	0	NA	NA	296130	265062	1.0789e+06	1.32496e+06
tr|A0A1D5S463|A0A1D5S463_WHEAT	A0A1D5S463	NA	Uncharacterized protein OS=Triticum aestivum PE=4 SV=1	474.15	0	6	tr|A0A1D5S463|A0A1D5S463_WHEAT	935371	722552	616881	830023	776287	0.176791	0.0833333	NA	NA	295172	229906	163225	224945
tr|W5E6M2|W5E6M2_WHEAT	W5E6M2	NA	Uncharacterized protein OS=Triticum aestivum PE=4 SV=1	802.34	0	13	tr|W5E6M2|W5E6M2_WHEAT	1.89394e+06	1.46799e+06	748705	951835	1.20991e+06	0.408378	0.0882353	NA	NA	295027	243858	124775	182580
tr|W5FEV1|W5FEV1_WHEAT	W5FEV1	NA	Uncharacterized protein OS=Triticum aestivum PE=4 SV=1	220.44	0	2	tr|W5FEV1|W5FEV1_WHEAT	588799	956940	2.46433e+06	2.70826e+06	1.71063e+06	0.632533	0.125	NA	NA	294399	478470	1.23216e+06	1.35413e+06
tr|A0A1D5UE86|A0A1D5UE86_WHEAT	A0A1D5UE86	NA	Uncharacterized protein OS=Triticum aestivum PE=4 SV=1	63.31	0.00735294	2	tr|A0A1D5UE86|A0A1D5UE86_WHEAT	586605	682249	1.34726e+06	577746	634427	0.462022	0.25	NA	NA	293303	341125	673628	288873
tr|A0A1D6C195|A0A1D6C195_WHEAT	A0A1D6C195	NA	Uncharacterized protein OS=Triticum aestivum PE=3 SV=1	821.61	0	15	tr|A0A1D6C195|A0A1D6C195_WHEAT	1.6051e+06	1.30941e+06	1.97732e+06	2.59332e+06	1.79121e+06	0.295792	0.190476	NA	NA	293182	229766	321168	425826
tr|A0A1D5YUV5|A0A1D5YUV5_WHEAT	A0A1D5YUV5	NA	Uncharacterized protein OS=Triticum aestivum PE=4 SV=1	763.12	0	11	tr|A0A1D5YUV5|A0A1D5YUV5_WHEAT	1.51052e+06	1.79114e+06	1.49123e+06	1.32427e+06	1.50087e+06	0.126571	0.109375	NA	NA	292526	497364	273346	279756
tr|A0A1D5TUK5|A0A1D5TUK5_WHEAT	A0A1D5TUK5	NA	40S ribosomal protein S8 OS=Triticum aestivum PE=3 SV=1	505.22	0	4	tr|A0A1D5TUK5|A0A1D5TUK5_WHEAT	875551	856739	4.20125e+06	3.63251e+06	2.25403e+06	0.742876	0.0833333	NA	NA	291841	255847	1.40038e+06	1.2108e+06
tr|A0A1D5T1D2|A0A1D5T1D2_WHEAT	A0A1D5T1D2	NA	Uncharacterized protein OS=Triticum aestivum PE=4 SV=1	518.56	0	9	tr|A0A1D5T1D2|A0A1D5T1D2_WHEAT	1.25179e+06	1.182e+06	532499	1.11945e+06	1.15072e+06	0.323476	0.152778	NA	NA	291389	270982	124818	313248
tr|A0A1D6DIE4|A0A1D6DIE4_WHEAT	A0A1D6DIE4	NA	DNA-directed RNA polymerase subunit OS=Triticum aestivum PE=3 SV=1	1680.08	0	33	tr|A0A1D6DIE4|A0A1D6DIE4_WHEAT	2.36177e+06	3.63479e+06	1.60206e+06	2.25339e+06	2.30758e+06	0.345186	0.1125	NA	NA	290281	361223	220116	308419
tr|W5CXF2|W5CXF2_WHEAT	W5CXF2	TRAES_3BF029700060CFD_c1	Uncharacterized protein OS=Triticum aestivum GN=TRAES_3BF029700060CFD_c1 PE=4 SV=1	313.86	0	5	tr|W5CXF2|W5CXF2_WHEAT	870779	1.83914e+06	1.10391e+06	1.0602e+06	1.08206e+06	0.349563	0.107143	NA	NA	290227	612171	320442	321955
tr|A0A1D6C0M9|A0A1D6C0M9_WHEAT	A0A1D6C0M9	NA	Uncharacterized protein OS=Triticum aestivum PE=4 SV=1	720.29	0	6	tr|A0A1D6C0M9|A0A1D6C0M9_WHEAT	1.13454e+06	1.0469e+06	1.06801e+06	1.50479e+06	1.10128e+06	0.180136	0.0192308	NA	NA	290095	262963	275681	472306
tr|A0A1D5XGX3|A0A1D5XGX3_WHEAT	A0A1D5XGX3	NA	Uncharacterized protein OS=Triticum aestivum PE=3 SV=1	427.94	0	8	tr|A0A1D5XGX3|A0A1D5XGX3_WHEAT	1.13681e+06	1.36946e+06	557990	595209	866011	0.4397	0.09375	NA	NA	289463	361567	165455	178840
tr|A0A1D6RXD6|A0A1D6RXD6_WHEAT	A0A1D6RXD6	NA	Uncharacterized protein OS=Triticum aestivum PE=4 SV=1	2664.32	0	29	tr|A0A1D6RXD6|A0A1D6RXD6_WHEAT	1.76713e+06	2.60661e+06	1.91479e+07	6.3662e+06	4.48641e+06	1.07559	0.15	NA	NA	287868	419584	2.00766e+06	668047
tr|A0A1D5SSC7|A0A1D5SSC7_WHEAT	A0A1D5SSC7	NA	Uncharacterized protein OS=Triticum aestivum PE=4 SV=1	1294.89	0	22	tr|A0A1D5SSC7|A0A1D5SSC7_WHEAT	2.19003e+06	2.33164e+06	2.39319e+06	2.48982e+06	2.36241e+06	0.0534257	0.169355	NA	NA	286861	314275	438608	465789
tr|A0A1D6BH82|A0A1D6BH82_WHEAT	A0A1D6BH82	NA	Uncharacterized protein OS=Triticum aestivum PE=4 SV=1	1044.6	0	13	tr|A0A1D6BH82|A0A1D6BH82_WHEAT	1.87359e+06	1.61314e+06	997268	1.46617e+06	1.53966e+06	0.247193	0.157895	NA	NA	286411	279572	143759	242580
tr|W5BGV0|W5BGV0_WHEAT	W5BGV0	NA	Peroxidase OS=Triticum aestivum PE=3 SV=1	462.42	0	8	tr|W5BGV0|W5BGV0_WHEAT	1.35052e+06	1.17738e+06	927022	1.41104e+06	1.26395e+06	0.178298	0.075	NA	NA	286195	236701	212535	408667
tr|A0A1D6BTM6|A0A1D6BTM6_WHEAT	A0A1D6BTM6	NA	Uncharacterized protein OS=Triticum aestivum PE=3 SV=1	735.26	0	9	tr|A0A1D6BTM6|A0A1D6BTM6_WHEAT	1.2956e+06	1.33921e+06	2.78671e+06	1.41206e+06	1.37564e+06	0.42173	0	NA	NA	285719	276464	638830	367450
tr|W5BUF4|W5BUF4_WHEAT	W5BUF4	Clo1	Caleosin OS=Triticum aestivum GN=Clo1 PE=2 SV=1	439.15	0	3	tr|W5BUF4|W5BUF4_WHEAT	851740	1.24985e+06	1.09309e+07	7.40267e+06	4.32626e+06	0.960082	0.0681818	NA	NA	283913	416616	3.64364e+06	2.46756e+06
tr|W5EE66|W5EE66_WHEAT	W5EE66	NA	UDP-glucose 6-dehydrogenase OS=Triticum aestivum PE=3 SV=1	184.85	0	1	tr|W5EE66|W5EE66_WHEAT	567276	953673	379528	393570	480423	0.466317	0.0833333	NA	NA	283638	476836	189764	196785
tr|A0A1D5X1K3|A0A1D5X1K3_WHEAT	A0A1D5X1K3	NA	Uncharacterized protein OS=Triticum aestivum PE=4 SV=1	58.92	0.00804163	1	tr|A0A1D5X1K3|A0A1D5X1K3_WHEAT	283207	375389	287239	182945	285223	0.278743	0	NA	NA	283207	375389	287239	182945
tr|A0A1D5YQA8|A0A1D5YQA8_WHEAT	A0A1D5YQA8	NA	Uncharacterized protein OS=Triticum aestivum PE=4 SV=1	355.2	0	5	tr|A0A1D5YQA8|A0A1D5YQA8_WHEAT	977276	370229	56931.1	34172.8	213580	1.22166	0.1875	NA	NA	282514	116809	18966.7	11373.6
tr|A0A1D6C0X0|A0A1D6C0X0_WHEAT	A0A1D6C0X0	NA	Uncharacterized protein OS=Triticum aestivum PE=3 SV=1	457.15	0	9	tr|A0A1D6C0X0|A0A1D6C0X0_WHEAT	1.09085e+06	1.13118e+06	919292	819052	1.00507e+06	0.147894	0.0833333	NA	NA	281649	193067	263185	251441
tr|A0A1D5YJS8|A0A1D5YJS8_WHEAT	A0A1D5YJS8	NA	Uncharacterized protein OS=Triticum aestivum PE=3 SV=1	1555.42	0	19	tr|A0A1D5YJS8|A0A1D5YJS8_WHEAT	2.33152e+06	3.2377e+06	2.18344e+06	3.29298e+06	2.78461e+06	0.212012	0.142857	NA	NA	280883	471226	502662	688158
tr|A0A1D5XAY1|A0A1D5XAY1_WHEAT	A0A1D5XAY1	NA	RNA cytidine acetyltransferase OS=Triticum aestivum PE=3 SV=1	1518.78	0	22	tr|A0A1D5XAY1|A0A1D5XAY1_WHEAT	1.8856e+06	1.57544e+06	1.4747e+06	2.0088e+06	1.73052e+06	0.14528	0.121212	NA	NA	280354	248418	199561	239256
tr|A0A1D6CAP9|A0A1D6CAP9_WHEAT	A0A1D6CAP9	NA	Serine/threonine-protein phosphatase OS=Triticum aestivum PE=3 SV=1	362.27	0	6	tr|A0A1D6CAP9|A0A1D6CAP9_WHEAT	1.03372e+06	1.31985e+06	1.08817e+06	1.50582e+06	1.20401e+06	0.176265	0.0555556	NA	NA	279528	415566	210209	437125
tr|A0A1D5UEP6|A0A1D5UEP6_WHEAT	A0A1D5UEP6	NA	Uncharacterized protein OS=Triticum aestivum PE=3 SV=1	1439.33	0	24	tr|A0A1D5UEP6|A0A1D5UEP6_WHEAT	3.25033e+06	2.22171e+06	2.804e+06	3.66558e+06	3.02717e+06	0.207296	0.078125	NA	NA	279487	253513	360502	540210
tr|A0A1D5VH92|A0A1D5VH92_WHEAT	A0A1D5VH92	NA	Uncharacterized protein OS=Triticum aestivum PE=3 SV=1	175.38	0	2	tr|A0A1D5VH92|A0A1D5VH92_WHEAT	844706	414619	593401	924249	719053	0.33668	0.0625	NA	NA	279235	138201	184681	303243
tr|A0A1D5TZ01|A0A1D5TZ01_WHEAT	A0A1D5TZ01	NA	Uncharacterized protein OS=Triticum aestivum PE=3 SV=1	847.86	0	15	tr|A0A1D5TZ01|A0A1D5TZ01_WHEAT	1.40115e+06	1.39574e+06	1.46408e+06	2.38432e+06	1.43261e+06	0.29073	0.132353	NA	NA	278985	277323	296482	501545
tr|A0A1D6SES0|A0A1D6SES0_WHEAT	A0A1D6SES0	NA	Nucleolar GTP-binding protein 1 OS=Triticum aestivum PE=3 SV=1	988.72	0	19	tr|A0A1D6SES0|A0A1D6SES0_WHEAT	1.94069e+06	1.42912e+06	952643	1.09115e+06	1.26014e+06	0.32489	0.2	NA	NA	277581	255740	164857	192798
tr|A0A1D5WVZ4|A0A1D5WVZ4_WHEAT	A0A1D5WVZ4	NA	Uncharacterized protein OS=Triticum aestivum PE=4 SV=1	225.51	0	1	tr|A0A1D5WVZ4|A0A1D5WVZ4_WHEAT	550545	458328	1.2389e+06	3.07751e+06	894724	0.912706	0	NA	NA	275273	229164	619451	1.53875e+06
tr|A0A1D6A8J3|A0A1D6A8J3_WHEAT	A0A1D6A8J3	NA	Uncharacterized protein OS=Triticum aestivum PE=4 SV=1	95.68	0.00175953	1	tr|A0A1D6A8J3|A0A1D6A8J3_WHEAT	274784	368209	277480	216842	276132	0.219907	0.25	NA	NA	274784	368209	277480	216842
tr|A0A1D5UC18|A0A1D5UC18_WHEAT	A0A1D5UC18	NA	Uncharacterized protein OS=Triticum aestivum PE=4 SV=1	1352.51	0	20	tr|A0A1D5UC18|A0A1D5UC18_WHEAT	1.98928e+06	2.19143e+06	1.34821e+06	2.0233e+06	2.00629e+06	0.196279	0.16	NA	NA	273986	351570	183595	294757
tr|A0A0C4BKH5|A0A0C4BKH5_WHEAT	A0A0C4BKH5	NA	Eukaryotic initiation factor eIF4A OS=Triticum aestivum PE=2 SV=1	649.44	0	13	tr|A0A0C4BKH5|A0A0C4BKH5_WHEAT	1.52819e+06	680100	397312	836405	758253	0.558734	0.161765	NA	NA	273123	144648	75905.4	191153
tr|A0A1D5YZC5|A0A1D5YZC5_WHEAT	A0A1D5YZC5	NA	Uncharacterized protein OS=Triticum aestivum PE=3 SV=1	109.78	0.001868	1	tr|A0A1D5YZC5|A0A1D5YZC5_WHEAT	273096	388198	324318	162498	298707	0.33252	0.375	NA	NA	273096	388198	324318	162498
tr|A0A1D5RYE1|A0A1D5RYE1_WHEAT	A0A1D5RYE1	NA	Uncharacterized protein OS=Triticum aestivum PE=3 SV=1	510.21	0	5	tr|A0A1D5RYE1|A0A1D5RYE1_WHEAT	918584	822120	8.11494e+06	3.32146e+06	2.12002e+06	1.03677	0.15	NA	NA	273023	249802	2.08446e+06	963538
tr|A0A1D5XXT5|A0A1D5XXT5_WHEAT	A0A1D5XXT5	NA	Uncharacterized protein OS=Triticum aestivum PE=4 SV=1	189.59	0	3	tr|A0A1D5XXT5|A0A1D5XXT5_WHEAT	823026	889037	920056	2.0832e+06	904546	0.5126	0.15	NA	NA	272783	296335	256208	687575
tr|Q2PCB6|Q2PCB6_WHEAT	Q2PCB6	ltp9.4b	Non-specific lipid-transfer protein OS=Triticum aestivum GN=ltp9.4b PE=2 SV=1	228.64	0	3	tr|Q2PCB6|Q2PCB6_WHEAT	937668	944745	1.41008e+06	1.02892e+06	986831	0.207054	0	NA	NA	272364	271190	455877	339509
tr|A0A1D5XS09|A0A1D5XS09_WHEAT	A0A1D5XS09	NA	Uncharacterized protein OS=Triticum aestivum PE=4 SV=1	348.68	0	7	tr|A0A1D5XS09|A0A1D5XS09_WHEAT	843499	2.07141e+06	422950	495832	669666	0.797504	0.230769	NA	NA	270259	602055	135717	153069
tr|A0A1D5VIA6|A0A1D5VIA6_WHEAT	A0A1D5VIA6	NA	Uncharacterized protein OS=Triticum aestivum PE=4 SV=1	140.93	0	3	tr|A0A1D5VIA6|A0A1D5VIA6_WHEAT	808990	9935.08	877276	1.13372e+06	843133	0.686361	0.15	NA	NA	269663	3311.69	292425	377906
tr|A0A1D6S405|A0A1D6S405_WHEAT	A0A1D6S405	NA	Uncharacterized protein OS=Triticum aestivum PE=4 SV=1	285.42	0	2	tr|A0A1D6S405|A0A1D6S405_WHEAT	805367	481739	837332	1.80731e+06	821349	0.582512	0.0416667	NA	NA	268456	160580	279111	602435
tr|A0A1D5RYR2|A0A1D5RYR2_WHEAT	A0A1D5RYR2	NA	Uncharacterized protein OS=Triticum aestivum PE=4 SV=1	996.29	0	11	tr|A0A1D5RYR2|A0A1D5RYR2_WHEAT	1.2744e+06	1.45009e+06	949952	1.64839e+06	1.36224e+06	0.222637	0.144737	NA	NA	268216	303021	204806	386339
tr|A0A1D5SA26|A0A1D5SA26_WHEAT	A0A1D5SA26	NA	Uncharacterized protein OS=Triticum aestivum PE=4 SV=1	1595.56	0	29	tr|A0A1D5SA26|A0A1D5SA26_WHEAT	2.97194e+06	2.06566e+06	2.00883e+06	2.43112e+06	2.24839e+06	0.18703	0.0789474	NA	NA	267017	225606	198560	261507
tr|Q8S9E7|Q8S9E7_WHEAT	Q8S9E7	CYP71C8v2	p450 OS=Triticum aestivum GN=CYP71C8v2 PE=2 SV=1	602.34	0	15	tr|Q8S9E7|Q8S9E7_WHEAT	1.26763e+06	1.23737e+06	799273	719173	1.01832e+06	0.285259	0.1875	NA	NA	266898	231731	150388	166065
tr|A0A1D5Y2P6|A0A1D5Y2P6_WHEAT	A0A1D5Y2P6	NA	Uncharacterized protein OS=Triticum aestivum PE=4 SV=1	1036.78	0	18	tr|A0A1D5Y2P6|A0A1D5Y2P6_WHEAT	1.50439e+06	1.37475e+06	1.0901e+06	1.062e+06	1.23242e+06	0.172324	0.0595238	NA	NA	265574	157622	183984	168491
tr|W5HZW2|W5HZW2_WHEAT	W5HZW2	NA	Dolichyl-diphosphooligosaccharide--protein glycosyltransferase 48 kDa subunit OS=Triticum aestivum PE=3 SV=1	1484.57	0	16	tr|W5HZW2|W5HZW2_WHEAT	1.75607e+06	1.67909e+06	3.48648e+06	3.4291e+06	2.59259e+06	0.388562	0.163793	NA	NA	264294	231748	557586	682061
tr|A0A1D5VH80|A0A1D5VH80_WHEAT	A0A1D5VH80	NA	Ubiquitinyl hydrolase 1 OS=Triticum aestivum PE=3 SV=1	560.71	0	14	tr|A0A1D5VH80|A0A1D5VH80_WHEAT	1.07178e+06	792883	929816	1.3544e+06	1.0008e+06	0.231545	0.161765	NA	NA	263976	153991	201563	274827
tr|A0A1D5RWD1|A0A1D5RWD1_WHEAT	A0A1D5RWD1	NA	Uncharacterized protein OS=Triticum aestivum PE=4 SV=1	274.84	0	4	tr|A0A1D5RWD1|A0A1D5RWD1_WHEAT	840458	870986	949615	1.27067e+06	910300	0.200685	0.25	NA	NA	263859	290324	316533	421066
tr|A0A077S002|A0A077S002_WHEAT	A0A077S002	TRAES_3BF184200020CFD_c1	Uncharacterized protein OS=Triticum aestivum GN=TRAES_3BF184200020CFD_c1 PE=3 SV=1	1277.17	0	16	tr|A0A077S002|A0A077S002_WHEAT	1.94802e+06	1.44662e+06	1.59759e+06	1.85908e+06	1.72834e+06	0.135188	0.108333	NA	NA	263794	228374	214738	267306
tr|A0A1D5Y4Q6|A0A1D5Y4Q6_WHEAT	A0A1D5Y4Q6	NA	Uncharacterized protein OS=Triticum aestivum PE=3 SV=1	152.25	0	1	tr|A0A1D5Y4Q6|A0A1D5Y4Q6_WHEAT	263535	197164	101145	258502	227833	0.368518	0	NA	NA	263535	197164	101145	258502
tr|A0A1D5X084|A0A1D5X084_WHEAT	A0A1D5X084	NA	Uncharacterized protein OS=Triticum aestivum PE=4 SV=1	390.74	0	7	tr|A0A1D5X084|A0A1D5X084_WHEAT	964635	953510	165444	377008	665259	0.660713	0.0833333	NA	NA	262752	237258	45503.6	114426
tr|A0A1D6CII9|A0A1D6CII9_WHEAT	A0A1D6CII9	NA	Uncharacterized protein OS=Triticum aestivum PE=4 SV=1	1639.47	0	24	tr|A0A1D6CII9|A0A1D6CII9_WHEAT	1.9752e+06	2.32703e+06	1.63507e+06	2.76945e+06	2.15112e+06	0.223171	0.0859375	NA	NA	262226	283180	190767	381255
tr|A0A1D6B8P9|A0A1D6B8P9_WHEAT	A0A1D6B8P9	NA	Uncharacterized protein OS=Triticum aestivum PE=3 SV=1	1752.53	0	21	tr|A0A1D6B8P9|A0A1D6B8P9_WHEAT	2.03428e+06	2.58631e+06	7.81084e+06	5.89066e+06	4.23848e+06	0.599364	0.102941	NA	NA	262176	439501	975611	750677
tr|A0A1D5WLD7|A0A1D5WLD7_WHEAT	A0A1D5WLD7	NA	Uncharacterized protein OS=Triticum aestivum PE=3 SV=1	1369.74	0	16	tr|A0A1D5WLD7|A0A1D5WLD7_WHEAT	1.545e+06	1.95349e+06	1.33536e+06	2.43037e+06	1.74925e+06	0.266141	0.0729167	NA	NA	261874	348013	190358	397451
tr|A0A1D5YI62|A0A1D5YI62_WHEAT	A0A1D5YI62	NA	Uncharacterized protein OS=Triticum aestivum PE=4 SV=1	1452.67	0	22	tr|A0A1D5YI62|A0A1D5YI62_WHEAT	2.19645e+06	2.14898e+06	1.94318e+06	2.47078e+06	2.17272e+06	0.0991692	0.111111	NA	NA	259762	257095	288603	389950
tr|A0A1D5U1A0|A0A1D5U1A0_WHEAT	A0A1D5U1A0	NA	Dolichyl-diphosphooligosaccharide--protein glycosyltransferase subunit 1 OS=Triticum aestivum PE=3 SV=1	339.79	0	6	tr|A0A1D5U1A0|A0A1D5U1A0_WHEAT	846814	937774	2.04364e+06	2.29792e+06	1.49071e+06	0.487303	0.15	NA	NA	258787	295672	632528	698507
tr|A0A1D5RP81|A0A1D5RP81_WHEAT	A0A1D5RP81	NA	Uncharacterized protein OS=Triticum aestivum PE=4 SV=1	1208.06	0	19	tr|A0A1D5RP81|A0A1D5RP81_WHEAT	2.0465e+06	2.79334e+06	2.14113e+06	2.29429e+06	2.21771e+06	0.143357	0.104167	NA	NA	258579	375185	308323	525365
tr|W5FNM6|W5FNM6_WHEAT	W5FNM6	NA	Uncharacterized protein OS=Triticum aestivum PE=3 SV=1	912.6	0	14	tr|W5FNM6|W5FNM6_WHEAT	1.22001e+06	1.34244e+06	1.52648e+06	2.40452e+06	1.43446e+06	0.330046	0.0657895	NA	NA	258370	275297	308895	414886
tr|A0A1D5T837|A0A1D5T837_WHEAT	A0A1D5T837	NA	40S ribosomal protein S8 OS=Triticum aestivum PE=3 SV=1	184.14	0	3	tr|A0A1D5T837|A0A1D5T837_WHEAT	773895	535546	3.26727e+06	4.15794e+06	2.02058e+06	0.826662	0.0625	NA	NA	257965	178515	1.08909e+06	1.38598e+06
tr|A0A1D5ZKP6|A0A1D5ZKP6_WHEAT	A0A1D5ZKP6	NA	Uncharacterized protein OS=Triticum aestivum PE=4 SV=1	107.48	0.00184843	3	tr|A0A1D5ZKP6|A0A1D5ZKP6_WHEAT	773779	731217	28426.1	79320.8	405269	1.00266	0.125	NA	NA	257926	243739	9475.37	26440.3
tr|A0A1D5Y3Q0|A0A1D5Y3Q0_WHEAT	A0A1D5Y3Q0	NA	Uncharacterized protein OS=Triticum aestivum PE=4 SV=1	284.58	0	4	tr|A0A1D5Y3Q0|A0A1D5Y3Q0_WHEAT	893783	1.12983e+06	206501	26330.9	550142	0.941265	0.178571	NA	NA	257452	336738	68599.2	8771.82
tr|A0A1D6A1B6|A0A1D6A1B6_WHEAT	A0A1D6A1B6	NA	Uncharacterized protein OS=Triticum aestivum PE=4 SV=1	470.15	0	7	tr|A0A1D6A1B6|A0A1D6A1B6_WHEAT	1.08258e+06	470031	350613	393644	431838	0.596444	0.125	NA	NA	257401	127396	94907.2	89996.6
tr|W5DBH0|W5DBH0_WHEAT	W5DBH0	NA	Uncharacterized protein OS=Triticum aestivum PE=4 SV=1	696.74	0	13	tr|W5DBH0|W5DBH0_WHEAT	1.35771e+06	985346	676214	1.07389e+06	1.02962e+06	0.274266	0.09375	NA	NA	257387	163643	166681	273324
tr|A0A1D6BKD4|A0A1D6BKD4_WHEAT	A0A1D6BKD4	NA	Uncharacterized protein OS=Triticum aestivum PE=4 SV=1	2513.16	0	37	tr|A0A1D6BKD4|A0A1D6BKD4_WHEAT	2.68176e+06	2.50555e+06	1.46664e+06	1.54466e+06	2.0251e+06	0.308866	0.216346	NA	NA	256768	261090	181196	213716
tr|A0A1D5WW27|A0A1D5WW27_WHEAT	A0A1D5WW27	NA	Cysteine proteinase inhibitor OS=Triticum aestivum PE=3 SV=1	1242.75	0	14	tr|A0A1D5WW27|A0A1D5WW27_WHEAT	1.53614e+06	1.60589e+06	1.41049e+06	1.67313e+06	1.57102e+06	0.0720975	0.147727	NA	NA	256402	303499	328930	380525
tr|A0A1D5W5E4|A0A1D5W5E4_WHEAT	A0A1D5W5E4	NA	Uncharacterized protein OS=Triticum aestivum PE=4 SV=1	1275.1	0	16	tr|A0A1D5W5E4|A0A1D5W5E4_WHEAT	1.74648e+06	1.53663e+06	811828	1.06501e+06	1.30082e+06	0.33146	0.153846	NA	NA	256355	313028	106417	186139
tr|A0A1D6SBU7|A0A1D6SBU7_WHEAT	A0A1D6SBU7	NA	Uncharacterized protein OS=Triticum aestivum PE=4 SV=1	1553.31	0	25	tr|A0A1D6SBU7|A0A1D6SBU7_WHEAT	1.99249e+06	2.18063e+06	1.90988e+06	2.39932e+06	2.08656e+06	0.102633	0.154412	NA	NA	255836	171199	457506	475289
tr|A0A1D6CWT9|A0A1D6CWT9_WHEAT	A0A1D6CWT9	NA	Uncharacterized protein OS=Triticum aestivum PE=3 SV=1	633.38	0	10	tr|A0A1D6CWT9|A0A1D6CWT9_WHEAT	1.13787e+06	1.66478e+06	859854	1.47687e+06	1.30737e+06	0.278252	0.116667	NA	NA	255087	335481	179787	239879
tr|W5BDR9|W5BDR9_WHEAT	W5BDR9	NA	Uncharacterized protein OS=Triticum aestivum PE=4 SV=1	458.33	0	7	tr|W5BDR9|W5BDR9_WHEAT	982797	1.2506e+06	1.25585e+06	2.09235e+06	1.25323e+06	0.345284	0.192308	NA	NA	253797	354835	291449	592412
tr|W4ZSW5|W4ZSW5_WHEAT	W4ZSW5	NA	Signal recognition particle 54 kDa protein OS=Triticum aestivum PE=3 SV=1	1765.7	0	26	tr|W4ZSW5|W4ZSW5_WHEAT	2.39012e+06	2.67959e+06	1.38611e+06	2.03358e+06	2.21185e+06	0.262641	0.147059	NA	NA	253374	295430	140988	191789
tr|A0A1D5XC64|A0A1D5XC64_WHEAT	A0A1D5XC64	NA	Uncharacterized protein OS=Triticum aestivum PE=3 SV=1	117.13	0.000642261	1	tr|A0A1D5XC64|A0A1D5XC64_WHEAT	505236	1.10736e+06	1.20805e+06	1.7101e+06	1.1577e+06	0.436523	0.1875	NA	NA	252618	553678	604024	855050
tr|A0A1D5TPI9|A0A1D5TPI9_WHEAT	A0A1D5TPI9	NA	Uncharacterized protein OS=Triticum aestivum PE=3 SV=1	626.39	0	7	tr|A0A1D5TPI9|A0A1D5TPI9_WHEAT	853652	1.06428e+06	2.25755e+06	2.56534e+06	1.66092e+06	0.505753	0.116667	NA	NA	252321	313184	582971	627333
tr|A0A1D6BKC0|A0A1D6BKC0_WHEAT	A0A1D6BKC0	NA	Protein MAK16 homolog OS=Triticum aestivum PE=3 SV=1	457.05	0	4	tr|A0A1D6BKC0|A0A1D6BKC0_WHEAT	773245	775999	724929	623575	749087	0.0983021	0.25	NA	NA	251989	242897	223551	185841
tr|A0A1D6AAZ6|A0A1D6AAZ6_WHEAT	A0A1D6AAZ6	NA	Uncharacterized protein OS=Triticum aestivum PE=3 SV=1	541.07	0	8	tr|A0A1D6AAZ6|A0A1D6AAZ6_WHEAT	1.10789e+06	1.27009e+06	465298	787508	947701	0.392902	0.05	NA	NA	251209	325705	105866	190712
tr|A0A1D6AT12|A0A1D6AT12_WHEAT	A0A1D6AT12	NA	Uncharacterized protein OS=Triticum aestivum PE=3 SV=1	1641.76	0	24	tr|A0A1D6AT12|A0A1D6AT12_WHEAT	1.91111e+06	2.33941e+06	1.48473e+06	1.83327e+06	1.87219e+06	0.185568	0.0725806	NA	NA	249555	292527	235580	299419
tr|W5FJ26|W5FJ26_WHEAT	W5FJ26	NA	Uncharacterized protein OS=Triticum aestivum PE=4 SV=1	215.29	0	5	tr|W5FJ26|W5FJ26_WHEAT	747966	749731	646803	615627	697385	0.100143	0.142857	NA	NA	249312	229337	211630	201298
tr|A0A1D5SD66|A0A1D5SD66_WHEAT	A0A1D5SD66	NA	Uncharacterized protein OS=Triticum aestivum PE=4 SV=1	512.54	0	11	tr|A0A1D5SD66|A0A1D5SD66_WHEAT	1.11053e+06	761007	529046	1.43561e+06	935766	0.414543	0.0769231	NA	NA	248733	174632	99969.9	333319
tr|W5AH12|W5AH12_WHEAT	W5AH12	NA	Uncharacterized protein OS=Triticum aestivum PE=3 SV=1	382.54	0	3	tr|W5AH12|W5AH12_WHEAT	869932	1.549e+06	1.52918e+06	2.1013e+06	1.53909e+06	0.333068	0.0357143	NA	NA	247941	471347	509698	696695
tr|Q0GJJ2|Q0GJJ2_WHEAT	Q0GJJ2	HSD11BL	11-beta-hydroxysteroid dehydrogenase-like protein OS=Triticum aestivum GN=HSD11BL PE=2 SV=1	267.23	0	7	tr|Q0GJJ2|Q0GJJ2_WHEAT	794132	877457	790350	2.25072e+06	835794	0.607867	0.178571	NA	NA	247662	250695	217869	656277
tr|A0A1D5XLU8|A0A1D5XLU8_WHEAT	A0A1D5XLU8	NA	Uncharacterized protein OS=Triticum aestivum PE=3 SV=1	160.44	0	1	tr|A0A1D5XLU8|A0A1D5XLU8_WHEAT	492403	823184	226306	345132	418767	0.547598	0	NA	NA	246201	411592	113153	172566
tr|W5BZS2|W5BZS2_WHEAT	W5BZS2	NA	Uncharacterized protein OS=Triticum aestivum PE=4 SV=1	980.66	0	19	tr|W5BZS2|W5BZS2_WHEAT	1.95337e+06	1.28958e+06	1.10954e+06	1.53618e+06	1.41288e+06	0.248188	0.141304	NA	NA	245848	179673	209345	247617
tr|A0A1D6B7J9|A0A1D6B7J9_WHEAT	A0A1D6B7J9	NA	Uncharacterized protein OS=Triticum aestivum PE=4 SV=1	1177.3	0	19	tr|A0A1D6B7J9|A0A1D6B7J9_WHEAT	1.67565e+06	945506	2.34014e+06	1.95148e+06	1.81356e+06	0.340643	0.205357	NA	NA	245771	186742	533540	323842
tr|A0A1D5WRV8|A0A1D5WRV8_WHEAT	A0A1D5WRV8	NA	Uncharacterized protein OS=Triticum aestivum PE=4 SV=1	490.79	0	6	tr|A0A1D5WRV8|A0A1D5WRV8_WHEAT	850508	1.49982e+06	815277	1.08313e+06	966820	0.296589	0.138889	NA	NA	245693	443951	240498	324126
tr|A0A1D6RWC8|A0A1D6RWC8_WHEAT	A0A1D6RWC8	NA	Uncharacterized protein OS=Triticum aestivum PE=3 SV=1	1197.5	0	16	tr|A0A1D6RWC8|A0A1D6RWC8_WHEAT	1.61786e+06	1.48498e+06	2.6551e+06	2.50974e+06	2.0638e+06	0.290603	0.125	NA	NA	245078	272330	411579	592438
tr|W5AKH4|W5AKH4_WHEAT	W5AKH4	NA	Uncharacterized protein OS=Triticum aestivum PE=4 SV=1	204.11	0	3	tr|W5AKH4|W5AKH4_WHEAT	735115	2.00769e+06	1.59746e+06	1.94155e+06	1.76951e+06	0.372637	0	NA	NA	245038	669230	532488	647185
tr|W5A0J9|W5A0J9_WHEAT	W5A0J9	NA	Uncharacterized protein OS=Triticum aestivum PE=4 SV=1	1075.44	0	19	tr|W5A0J9|W5A0J9_WHEAT	1.65307e+06	1.37621e+06	1.47581e+06	1.59221e+06	1.53401e+06	0.080768	0.12	NA	NA	243574	225543	247771	245265
tr|A0A1D6DBA2|A0A1D6DBA2_WHEAT	A0A1D6DBA2	NA	Uncharacterized protein OS=Triticum aestivum PE=4 SV=1	833.69	0	10	tr|A0A1D6DBA2|A0A1D6DBA2_WHEAT	1.45169e+06	2.07681e+06	817036	872128	1.16191e+06	0.451962	0.116667	NA	NA	242756	351197	225018	217036
tr|W5ECB5|W5ECB5_WHEAT	W5ECB5	NA	Uncharacterized protein OS=Triticum aestivum PE=4 SV=1	536.5	0	7	tr|W5ECB5|W5ECB5_WHEAT	915952	918338	333981	839134	877543	0.373742	0.145833	NA	NA	242466	256262	101333	251586
tr|A0A096USR9|A0A096USR9_WHEAT	A0A096USR9	NA	Uncharacterized protein OS=Triticum aestivum PE=4 SV=1	961.34	0	17	tr|A0A096USR9|A0A096USR9_WHEAT	1.52365e+06	1.37159e+06	1.26631e+06	1.80396e+06	1.44762e+06	0.156656	0.125	NA	NA	241850	277667	140988	254064
tr|A0A1D6CB91|A0A1D6CB91_WHEAT	A0A1D6CB91	NA	Uncharacterized protein OS=Triticum aestivum PE=4 SV=1	674.41	0	13	tr|A0A1D6CB91|A0A1D6CB91_WHEAT	1.31461e+06	702964	1.46719e+06	1.58046e+06	1.3909e+06	0.308803	0.046875	NA	NA	240449	136046	382118	415627
tr|W5AX94|W5AX94_WHEAT	W5AX94	NA	Uncharacterized protein OS=Triticum aestivum PE=4 SV=1	214.41	0	1	tr|W5AX94|W5AX94_WHEAT	239214	407306	3725.94	36123.2	137668	1.09888	0.25	NA	NA	239214	407306	3725.94	36123.2
tr|A0A1D5V0W4|A0A1D5V0W4_WHEAT	A0A1D5V0W4	NA	Uncharacterized protein OS=Triticum aestivum PE=4 SV=1	1180.36	0	17	tr|A0A1D5V0W4|A0A1D5V0W4_WHEAT	1.35845e+06	1.63453e+06	1.43808e+06	1.69862e+06	1.5363e+06	0.104692	0.12	NA	NA	239140	338864	231160	235403
tr|L0GED8|L0GED8_WHEAT	L0GED8	14R2	14-3-3 protein OS=Triticum aestivum GN=14R2 PE=2 SV=1	862.78	0	9	tr|L0GED8|L0GED8_WHEAT	1.12467e+06	1.44871e+06	912355	1.70394e+06	1.28669e+06	0.269314	0.208333	NA	NA	238882	406931	251201	407981
tr|A0A1D6RNY5|A0A1D6RNY5_WHEAT	A0A1D6RNY5	NA	Elongator complex protein 3 OS=Triticum aestivum PE=3 SV=1	1523.89	0	22	tr|A0A1D6RNY5|A0A1D6RNY5_WHEAT	1.82443e+06	1.81248e+06	1.23815e+06	1.91173e+06	1.81846e+06	0.18205	0.0833333	NA	NA	238764	247898	183931	291625
tr|A0A1D5RQY5|A0A1D5RQY5_WHEAT	A0A1D5RQY5	NA	Uncharacterized protein OS=Triticum aestivum PE=4 SV=1	308.33	0	5	tr|A0A1D5RQY5|A0A1D5RQY5_WHEAT	794356	1.76802e+06	444680	478255	636306	0.709493	0.125	NA	NA	238404	557266	111673	124920
tr|A0A1D5TIY9|A0A1D5TIY9_WHEAT	A0A1D5TIY9	NA	DNA-directed RNA polymerase subunit beta OS=Triticum aestivum PE=3 SV=1	1343.43	0	24	tr|A0A1D5TIY9|A0A1D5TIY9_WHEAT	1.63316e+06	1.2956e+06	537975	606452	951027	0.524346	0.151786	NA	NA	236638	213667	63321.5	70978.4
tr|W5A838|W5A838_WHEAT	W5A838	NA	Uncharacterized protein OS=Triticum aestivum PE=4 SV=1	469.41	0	13	tr|W5A838|W5A838_WHEAT	1.13073e+06	650005	914952	1.50431e+06	1.02284e+06	0.343892	0.178571	NA	NA	236494	144222	244034	363965
tr|A0A1D5ST46|A0A1D5ST46_WHEAT	A0A1D5ST46	NA	Uncharacterized protein OS=Triticum aestivum PE=4 SV=1	662.04	0	10	tr|A0A1D5ST46|A0A1D5ST46_WHEAT	1.11482e+06	1.6739e+06	1.40733e+06	1.63713e+06	1.52223e+06	0.176629	0.160714	NA	NA	235361	327037	393728	435463
tr|A0A1D6RYN9|A0A1D6RYN9_WHEAT	A0A1D6RYN9	NA	Uncharacterized protein OS=Triticum aestivum PE=4 SV=1	888.58	0	11	tr|A0A1D6RYN9|A0A1D6RYN9_WHEAT	1.33534e+06	589998	769985	1.19772e+06	983853	0.360688	0.078125	NA	NA	234601	158976	127866	201125
tr|A0A1D5UT08|A0A1D5UT08_WHEAT	A0A1D5UT08	NA	Uncharacterized protein OS=Triticum aestivum PE=4 SV=1	726	0	14	tr|A0A1D5UT08|A0A1D5UT08_WHEAT	1.49318e+06	1.14076e+06	633457	778573	959668	0.381146	0.0357143	NA	NA	234063	224224	99458.3	137167
tr|A0A1D6B9K7|A0A1D6B9K7_WHEAT	A0A1D6B9K7	NA	Uncharacterized protein OS=Triticum aestivum PE=4 SV=1	483.26	0	7	tr|A0A1D6B9K7|A0A1D6B9K7_WHEAT	1.00724e+06	958970	1.22023e+06	1.31254e+06	1.11373e+06	0.150248	0.0227273	NA	NA	232567	214992	354901	374399
tr|A0A1D5TN88|A0A1D5TN88_WHEAT	A0A1D5TN88	NA	Phospho-2-dehydro-3-deoxyheptonate aldolase OS=Triticum aestivum PE=3 SV=1	1044.38	0	21	tr|A0A1D5TN88|A0A1D5TN88_WHEAT	1.52351e+06	1.73602e+06	1.26168e+06	1.84347e+06	1.62976e+06	0.161364	0.125	NA	NA	231564	291020	214167	285907
tr|A0A1D5TWQ5|A0A1D5TWQ5_WHEAT	A0A1D5TWQ5	NA	Pyruvate kinase OS=Triticum aestivum PE=3 SV=1	164.71	0	2	tr|A0A1D5TWQ5|A0A1D5TWQ5_WHEAT	462852	605905	265825	268975	365914	0.41118	0	NA	NA	231426	302953	132913	134488
tr|A0A1D5XWN3|A0A1D5XWN3_WHEAT	A0A1D5XWN3	NA	Uncharacterized protein OS=Triticum aestivum PE=4 SV=1	483.28	0	10	tr|A0A1D5XWN3|A0A1D5XWN3_WHEAT	896232	828801	405036	879045	853923	0.310066	0.1875	NA	NA	230733	223199	98049.2	197925
tr|A0A1D5SWI4|A0A1D5SWI4_WHEAT	A0A1D5SWI4	NA	Uncharacterized protein OS=Triticum aestivum PE=4 SV=1	603.65	0	10	tr|A0A1D5SWI4|A0A1D5SWI4_WHEAT	860438	871612	702592	838873	849656	0.0957721	0.104167	NA	NA	230416	266966	150928	176618
tr|A0A1D6BVL3|A0A1D6BVL3_WHEAT	A0A1D6BVL3	NA	Uncharacterized protein OS=Triticum aestivum PE=4 SV=1	325.32	0	5	tr|A0A1D6BVL3|A0A1D6BVL3_WHEAT	910774	672545	609769	539339	641157	0.236034	0	NA	NA	230118	200388	201113	178969
tr|A0A1D6CXF2|A0A1D6CXF2_WHEAT	A0A1D6CXF2	NA	Proteasome subunit alpha type OS=Triticum aestivum PE=3 SV=1	412.11	0	8	tr|A0A1D6CXF2|A0A1D6CXF2_WHEAT	862100	578810	403168	442727	510769	0.363305	0.03125	NA	NA	229538	159860	101934	118192
tr|W4ZVA8|W4ZVA8_WHEAT	W4ZVA8	NA	Uncharacterized protein OS=Triticum aestivum PE=4 SV=1	218.71	0	4	tr|W4ZVA8|W4ZVA8_WHEAT	687468	600044	308729	326510	463277	0.39898	0.1875	NA	NA	229151	186463	102905	108832
tr|W5FHQ6|W5FHQ6_WHEAT	W5FHQ6	PDF31	Defensin OS=Triticum aestivum GN=PDF31 PE=2 SV=1	62	0.00726744	2	tr|W5FHQ6|W5FHQ6_WHEAT	456763	102042	960.395	30.84	51501.1	1.54747	0.375	NA	NA	228382	51020.9	480.198	15.42
tr|A0A1D5XF08|A0A1D5XF08_WHEAT	A0A1D5XF08	NA	Uncharacterized protein OS=Triticum aestivum PE=4 SV=1	499.52	0	11	tr|A0A1D5XF08|A0A1D5XF08_WHEAT	1.18907e+06	424876	2.14729e+06	2.58072e+06	1.66818e+06	0.610451	0.0666667	NA	NA	227807	105573	435571	615742
tr|A0A1D5WZW5|A0A1D5WZW5_WHEAT	A0A1D5WZW5	NA	Alanine--tRNA ligase OS=Triticum aestivum PE=3 SV=1	2758.16	0	37	tr|A0A1D5WZW5|A0A1D5WZW5_WHEAT	3.09294e+06	3.35453e+06	2.66049e+06	3.44721e+06	3.22374e+06	0.11227	0.108491	NA	NA	226430	339727	267659	340059
tr|A0A1D6BZM2|A0A1D6BZM2_WHEAT	A0A1D6BZM2	NA	Uncharacterized protein OS=Triticum aestivum PE=4 SV=1	2092.95	0	46	tr|A0A1D6BZM2|A0A1D6BZM2_WHEAT	2.08558e+06	2.26435e+06	2.03213e+06	3.21551e+06	2.17497e+06	0.230502	0.15625	NA	NA	226203	285750	141182	292027
tr|A0A1D6DEJ6|A0A1D6DEJ6_WHEAT	A0A1D6DEJ6	NA	Uncharacterized protein OS=Triticum aestivum PE=4 SV=1	731.94	0	16	tr|A0A1D6DEJ6|A0A1D6DEJ6_WHEAT	1.33274e+06	1.02304e+06	758209	969383	996210	0.232439	0.0657895	NA	NA	225949	166624	165713	166659
tr|W5FYH5|W5FYH5_WHEAT	W5FYH5	NA	Uncharacterized protein OS=Triticum aestivum PE=3 SV=1	882.05	0	16	tr|W5FYH5|W5FYH5_WHEAT	1.25074e+06	1.08653e+06	1.05943e+06	1.27527e+06	1.16864e+06	0.0947971	0.0595238	NA	NA	224748	181525	185492	213244
tr|W5B985|W5B985_WHEAT	W5B985	NA	Proliferating cell nuclear antigen OS=Triticum aestivum PE=3 SV=1	843.7	0	15	tr|W5B985|W5B985_WHEAT	1.3589e+06	1.39203e+06	946033	1.06271e+06	1.2108e+06	0.184804	0.184211	NA	NA	224485	301467	149556	186874
tr|W4ZPH8|W4ZPH8_WHEAT	W4ZPH8	NA	Uncharacterized protein OS=Triticum aestivum PE=4 SV=1	104.34	0.00182815	2	tr|W4ZPH8|W4ZPH8_WHEAT	448176	437101	776562	671167	559672	0.288094	0	NA	NA	224088	218551	388281	335584
tr|A0A1D6DK63|A0A1D6DK63_WHEAT	A0A1D6DK63	NA	Uncharacterized protein OS=Triticum aestivum PE=4 SV=1	280.39	0	1	tr|A0A1D6DK63|A0A1D6DK63_WHEAT	672094	735817	509575	740917	703955	0.162488	0.15	NA	NA	224031	245272	169858	246972
tr|A0A1D5VJ63|A0A1D5VJ63_WHEAT	A0A1D5VJ63	NA	Uncharacterized protein OS=Triticum aestivum PE=4 SV=1	221.05	0	3	tr|A0A1D5VJ63|A0A1D5VJ63_WHEAT	665681	932615	923659	1.03456e+06	928137	0.176835	0	NA	NA	221894	310872	307886	344854
tr|W5FU41|W5FU41_WHEAT	W5FU41	NA	Uncharacterized protein OS=Triticum aestivum PE=4 SV=1	224.22	0	5	tr|W5FU41|W5FU41_WHEAT	705911	500988	240675	317295	409142	0.470364	0.0416667	NA	NA	221233	164169	68454.3	89323.8
tr|W5EHZ7|W5EHZ7_WHEAT	W5EHZ7	NA	Uncharacterized protein OS=Triticum aestivum PE=4 SV=1	246.6	0	5	tr|W5EHZ7|W5EHZ7_WHEAT	760157	375258	146591	149848	262553	0.806517	0.125	NA	NA	220921	115679	42630.6	43115.8
tr|A0A1D5UL14|A0A1D5UL14_WHEAT	A0A1D5UL14	NA	Uncharacterized protein OS=Triticum aestivum PE=4 SV=1	644.04	0	11	tr|A0A1D5UL14|A0A1D5UL14_WHEAT	821017	786331	704332	832835	803674	0.0737698	0.0576923	NA	NA	220469	215894	165219	183710
tr|A0A1D6BYQ7|A0A1D6BYQ7_WHEAT	A0A1D6BYQ7	NA	Uncharacterized protein OS=Triticum aestivum PE=3 SV=1	563.39	0	10	tr|A0A1D6BYQ7|A0A1D6BYQ7_WHEAT	905905	1.38843e+06	1.06274e+06	1.30458e+06	1.18366e+06	0.189935	0.166667	NA	NA	220429	329230	253020	271207
tr|A0A1D6AAQ1|A0A1D6AAQ1_WHEAT	A0A1D6AAQ1	NA	Elongation factor Tu OS=Triticum aestivum PE=3 SV=1	912.75	0	10	tr|A0A1D6AAQ1|A0A1D6AAQ1_WHEAT	1.16813e+06	1.13916e+06	1.08007e+06	1.53311e+06	1.15365e+06	0.166889	0.0882353	NA	NA	219334	236811	186679	320382
tr|A0A1D5Y9W8|A0A1D5Y9W8_WHEAT	A0A1D5Y9W8	NA	Clathrin heavy chain OS=Triticum aestivum PE=3 SV=1	706.74	0	12	tr|A0A1D5Y9W8|A0A1D5Y9W8_WHEAT	825452	999960	708280	1.10258e+06	912706	0.193695	0.0178571	NA	NA	218743	243397	169706	259924
tr|A0A1D6RSW6|A0A1D6RSW6_WHEAT	A0A1D6RSW6	NA	Uncharacterized protein OS=Triticum aestivum PE=4 SV=1	1093.94	0	17	tr|A0A1D6RSW6|A0A1D6RSW6_WHEAT	1.69677e+06	2.40928e+06	1.16129e+06	1.54126e+06	1.61902e+06	0.306863	0.125	NA	NA	218358	368765	159650	163926
tr|A0A077RYW2|A0A077RYW2_WHEAT	A0A077RYW2	TRAES_3BF092100120CFD_c1	Uncharacterized protein OS=Triticum aestivum GN=TRAES_3BF092100120CFD_c1 PE=3 SV=1	1698.49	0	19	tr|A0A077RYW2|A0A077RYW2_WHEAT	1.95445e+06	1.729e+06	2.41059e+06	3.33033e+06	2.18252e+06	0.300784	0.166667	NA	NA	218178	221568	386744	445187
tr|A0A1D6C0G4|A0A1D6C0G4_WHEAT	A0A1D6C0G4	NA	Coatomer subunit beta' OS=Triticum aestivum PE=3 SV=1	460.58	0	10	tr|A0A1D6C0G4|A0A1D6C0G4_WHEAT	999773	1.17865e+06	904951	958742	979257	0.117381	0.15	NA	NA	217421	253354	213657	198570
tr|A0A1D5SY08|A0A1D5SY08_WHEAT	A0A1D5SY08	NA	Uncharacterized protein OS=Triticum aestivum PE=4 SV=1	1110.61	0	14	tr|A0A1D5SY08|A0A1D5SY08_WHEAT	1.33401e+06	1.84029e+06	412111	581896	957954	0.639187	0.238095	NA	NA	217246	335202	107368	116866
tr|A0A077RPF9|A0A077RPF9_WHEAT	A0A077RPF9	TRAES_3BF171700070CFD_c1	Peroxidase OS=Triticum aestivum GN=TRAES_3BF171700070CFD_c1 PE=3 SV=1	408.92	0	7	tr|A0A077RPF9|A0A077RPF9_WHEAT	1.03933e+06	763088	1.52675e+06	1.65166e+06	1.28304e+06	0.334122	0.025	NA	NA	216231	185118	457605	467970
tr|A0A1D5YD47|A0A1D5YD47_WHEAT	A0A1D5YD47	NA	Uncharacterized protein OS=Triticum aestivum PE=3 SV=1	524.33	0	10	tr|A0A1D5YD47|A0A1D5YD47_WHEAT	1.16703e+06	1.81849e+06	1.14367e+06	670930	1.15535e+06	0.39284	0.134615	NA	NA	216169	426355	270469	160518
tr|A0A1D5TB86|A0A1D5TB86_WHEAT	A0A1D5TB86	NA	Pyruvate kinase OS=Triticum aestivum PE=3 SV=1	227.28	0	2	tr|A0A1D5TB86|A0A1D5TB86_WHEAT	431521	809079	120975	98334.7	276248	0.911867	0	NA	NA	215761	404539	60487.7	49167.4
tr|D8L9B3|D8L9B3_WHEAT	D8L9B3	pdil4-1	Protein disulfide isomerase family protein 4-1 OS=Triticum aestivum GN=pdil4-1 PE=2 SV=1	547.92	0	8	tr|D8L9B3|D8L9B3_WHEAT	854812	1.18605e+06	697416	591219	776114	0.311713	0.0227273	NA	NA	215610	342567	186486	157688
tr|A0A1D6ABZ2|A0A1D6ABZ2_WHEAT	A0A1D6ABZ2	NA	Uncharacterized protein OS=Triticum aestivum PE=4 SV=1	308.3	0	6	tr|A0A1D6ABZ2|A0A1D6ABZ2_WHEAT	684810	204376	293242	230933	262087	0.634224	0.166667	NA	NA	215573	51037.9	93309.2	75430.9
tr|A0A077RTE5|A0A077RTE5_WHEAT	A0A077RTE5	TRAES_3BF060500310CFD_c1	Uncharacterized protein OS=Triticum aestivum GN=TRAES_3BF060500310CFD_c1 PE=4 SV=1	72.21	0.00569653	1	tr|A0A077RTE5|A0A077RTE5_WHEAT	215264	283997	396049	323140	303569	0.247938	0	NA	NA	215264	283997	396049	323140
tr|A0A1D5Y4J1|A0A1D5Y4J1_WHEAT	A0A1D5Y4J1	NA	Uroporphyrinogen decarboxylase OS=Triticum aestivum PE=3 SV=1	508.83	0	11	tr|A0A1D5Y4J1|A0A1D5Y4J1_WHEAT	946235	1.13815e+06	775438	1.313e+06	1.04219e+06	0.223378	0.104167	NA	NA	215251	246528	194267	337362
tr|A0A1D6A174|A0A1D6A174_WHEAT	A0A1D6A174	NA	Uncharacterized protein OS=Triticum aestivum PE=4 SV=1	989.96	0	14	tr|A0A1D6A174|A0A1D6A174_WHEAT	1.26943e+06	1.37693e+06	906017	1.03031e+06	1.14987e+06	0.188247	0.132353	NA	NA	214268	236649	163924	201942
tr|A0A1D5SFK9|A0A1D5SFK9_WHEAT	A0A1D5SFK9	NA	Uncharacterized protein OS=Triticum aestivum PE=4 SV=1	1630.72	0	19	tr|A0A1D5SFK9|A0A1D5SFK9_WHEAT	1.75238e+06	2.2207e+06	2.003e+06	3.02124e+06	2.11185e+06	0.244088	0.1	NA	NA	213683	263330	276374	444959
tr|A0A1D5ZNV4|A0A1D5ZNV4_WHEAT	A0A1D5ZNV4	NA	Uncharacterized protein OS=Triticum aestivum PE=3 SV=1	822.47	0	12	tr|A0A1D5ZNV4|A0A1D5ZNV4_WHEAT	1.30337e+06	1.68653e+06	925569	1.42709e+06	1.36523e+06	0.237033	0.015625	NA	NA	213182	327882	191180	306277
tr|A0A1D6BN56|A0A1D6BN56_WHEAT	A0A1D6BN56	NA	Uncharacterized protein OS=Triticum aestivum PE=4 SV=1	1229.12	0	20	tr|A0A1D6BN56|A0A1D6BN56_WHEAT	1.65171e+06	1.75614e+06	1.12135e+06	1.56156e+06	1.60663e+06	0.183309	0.125	NA	NA	213127	298238	161336	220860
tr|A0A1D6BQ41|A0A1D6BQ41_WHEAT	A0A1D6BQ41	NA	Uncharacterized protein OS=Triticum aestivum PE=4 SV=1	715.35	0	10	tr|A0A1D6BQ41|A0A1D6BQ41_WHEAT	1.03168e+06	1.64165e+06	294762	512253	771966	0.689735	0.142857	NA	NA	213003	419797	70150.5	123766
tr|A0A1D5TX00|A0A1D5TX00_WHEAT	A0A1D5TX00	NA	Uncharacterized protein OS=Triticum aestivum PE=3 SV=1	364.03	0	4	tr|A0A1D5TX00|A0A1D5TX00_WHEAT	722734	1.63964e+06	1.9427e+06	3.31195e+06	1.79117e+06	0.563076	0.1875	NA	NA	213001	502122	647512	1.10359e+06
tr|A0A1D5S2Z4|A0A1D5S2Z4_WHEAT	A0A1D5S2Z4	NA	Uncharacterized protein OS=Triticum aestivum PE=4 SV=1	1227.87	0	25	tr|A0A1D5S2Z4|A0A1D5S2Z4_WHEAT	1.72674e+06	1.04753e+06	1.00974e+06	1.51551e+06	1.28152e+06	0.266527	0.172414	NA	NA	211804	145763	116697	229614
tr|A0A1D5T8P9|A0A1D5T8P9_WHEAT	A0A1D5T8P9	NA	Uncharacterized protein OS=Triticum aestivum PE=4 SV=1	776.5	0	17	tr|A0A1D5T8P9|A0A1D5T8P9_WHEAT	914719	979393	1.73837e+06	1.90186e+06	1.35888e+06	0.36799	0.0625	NA	NA	211258	157529	445741	455746
tr|U5HTF2|U5HTF2_WHEAT	U5HTF2	eIF3g	Eukaryotic translation initiation factor 3 subunit G OS=Triticum aestivum GN=eIF3g PE=2 SV=1	561.21	0	8	tr|U5HTF2|U5HTF2_WHEAT	825933	737609	593437	838948	781771	0.150935	0.0227273	NA	NA	210641	163785	168313	192679
tr|A0A1D6DCH2|A0A1D6DCH2_WHEAT	A0A1D6DCH2	NA	Uncharacterized protein OS=Triticum aestivum PE=4 SV=1	453.31	0	5	tr|A0A1D6DCH2|A0A1D6DCH2_WHEAT	634413	993375	1.2332e+06	633020	813894	0.336213	0.138889	NA	NA	210534	290106	408350	207849
tr|A0A1D5UAP6|A0A1D5UAP6_WHEAT	A0A1D5UAP6	NA	Uncharacterized protein OS=Triticum aestivum PE=4 SV=1	386.25	0	6	tr|A0A1D5UAP6|A0A1D5UAP6_WHEAT	815494	821937	623168	1.02867e+06	818715	0.201403	0.0555556	NA	NA	210517	223737	200974	329470
tr|A0A1D5UQS0|A0A1D5UQS0_WHEAT	A0A1D5UQS0	NA	Peroxidase OS=Triticum aestivum PE=3 SV=1	772.92	0	11	tr|A0A1D5UQS0|A0A1D5UQS0_WHEAT	941592	1.3183e+06	439835	426061	690714	0.551331	0.0178571	NA	NA	210399	328041	83062.9	78045.2
tr|A0A1D5YS77|A0A1D5YS77_WHEAT	A0A1D5YS77	NA	Uncharacterized protein OS=Triticum aestivum PE=4 SV=1	71.58	0.00566426	1	tr|A0A1D5YS77|A0A1D5YS77_WHEAT	210113	397727	94787.1	103733	156923	0.698749	0	NA	NA	210113	397727	94787.1	103733
tr|W5GDP4|W5GDP4_WHEAT	W5GDP4	NA	Uncharacterized protein OS=Triticum aestivum PE=4 SV=1	651.71	0	5	tr|W5GDP4|W5GDP4_WHEAT	664863	1.57935e+06	1.18629e+06	998767	1.09253e+06	0.344515	0.075	NA	NA	209213	482029	291364	289547
tr|A0A1D6DKI0|A0A1D6DKI0_WHEAT	A0A1D6DKI0	NA	Uncharacterized protein OS=Triticum aestivum PE=4 SV=1	331.63	0	10	tr|A0A1D6DKI0|A0A1D6DKI0_WHEAT	937609	425404	230198	170930	327801	0.79006	0.15	NA	NA	207571	110376	58146.7	40976.3
tr|A0A1D6BZQ5|A0A1D6BZQ5_WHEAT	A0A1D6BZQ5	NA	Uncharacterized protein OS=Triticum aestivum PE=4 SV=1	919.39	0	20	tr|A0A1D6BZQ5|A0A1D6BZQ5_WHEAT	1.16267e+06	1.38728e+06	1.26858e+06	1.2632e+06	1.26589e+06	0.0723162	0.0625	NA	NA	207316	218906	185337	165865
tr|W5FU79|W5FU79_WHEAT	W5FU79	NA	Uncharacterized protein OS=Triticum aestivum PE=4 SV=1	438.76	0	5	tr|W5FU79|W5FU79_WHEAT	676624	663216	329842	477435	570325	0.307789	0	NA	NA	206963	196886	104473	150772
tr|A0A1D5RZB3|A0A1D5RZB3_WHEAT	A0A1D5RZB3	NA	Uncharacterized protein OS=Triticum aestivum PE=4 SV=1	116.98	0.000641849	1	tr|A0A1D5RZB3|A0A1D5RZB3_WHEAT	205625	241680	50777.2	19075.1	128201	0.856297	0	NA	NA	205625	241680	50777.2	19075.1
tr|A0A1D5UC89|A0A1D5UC89_WHEAT	A0A1D5UC89	NA	Uncharacterized protein OS=Triticum aestivum PE=4 SV=1	132.32	0	2	tr|A0A1D5UC89|A0A1D5UC89_WHEAT	410723	252138	165867	365630	308884	0.371135	0	NA	NA	205362	126069	82933.7	182815
tr|A0A1D5WM40|A0A1D5WM40_WHEAT	A0A1D5WM40	NA	Uncharacterized protein OS=Triticum aestivum PE=4 SV=1	476.22	0	6	tr|A0A1D5WM40|A0A1D5WM40_WHEAT	663158	504324	377878	878606	583741	0.356429	0.1875	NA	NA	205253	167765	121254	286907
tr|A0A1D6RHZ7|A0A1D6RHZ7_WHEAT	A0A1D6RHZ7	NA	Uncharacterized protein OS=Triticum aestivum PE=4 SV=1	98.89	0.00178678	3	tr|A0A1D6RHZ7|A0A1D6RHZ7_WHEAT	614585	693714	137853	208223	411404	0.679685	0.333333	NA	NA	204862	231238	45951.1	69407.8
tr|A0A1D6B0G9|A0A1D6B0G9_WHEAT	A0A1D6B0G9	NA	Uncharacterized protein OS=Triticum aestivum PE=3 SV=1	697.22	0	10	tr|A0A1D6B0G9|A0A1D6B0G9_WHEAT	1.00275e+06	1.29301e+06	699908	1.14205e+06	1.0724e+06	0.244151	0.140625	NA	NA	204747	277813	114186	244294
tr|A0A1D6RTS7|A0A1D6RTS7_WHEAT	A0A1D6RTS7	NA	Uncharacterized protein OS=Triticum aestivum PE=4 SV=1	871.95	0	12	tr|A0A1D6RTS7|A0A1D6RTS7_WHEAT	1.12433e+06	958645	692250	971339	964992	0.191623	0.166667	NA	NA	204234	162395	125510	168061
tr|A0A1D5XIA7|A0A1D5XIA7_WHEAT	A0A1D5XIA7	NA	Uncharacterized protein OS=Triticum aestivum PE=4 SV=1	480.57	0	9	tr|A0A1D5XIA7|A0A1D5XIA7_WHEAT	746609	176785	1.34603e+06	991576	869093	0.60307	0.0681818	NA	NA	203817	43405	280966	221024
tr|A0A1D5VBI4|A0A1D5VBI4_WHEAT	A0A1D5VBI4	NA	Uncharacterized protein OS=Triticum aestivum PE=4 SV=1	480.69	0	13	tr|A0A1D5VBI4|A0A1D5VBI4_WHEAT	1.0478e+06	3.20001e+06	749335	823062	935433	0.80424	0.133333	NA	NA	203502	939024	176583	214741
tr|A0A1D5XZJ9|A0A1D5XZJ9_WHEAT	A0A1D5XZJ9	NA	Uncharacterized protein OS=Triticum aestivum PE=4 SV=1	759.77	0	10	tr|A0A1D5XZJ9|A0A1D5XZJ9_WHEAT	1.02023e+06	1.4881e+06	1.03089e+06	1.8e+06	1.2595e+06	0.284039	0.132353	NA	NA	202529	224583	244761	432105
tr|A0A1D6CIZ6|A0A1D6CIZ6_WHEAT	A0A1D6CIZ6	NA	3-oxoacyl-[acyl-carrier-protein] synthase OS=Triticum aestivum PE=3 SV=1	587.12	0	4	tr|A0A1D6CIZ6|A0A1D6CIZ6_WHEAT	675670	714470	514661	750646	695070	0.156768	0.075	NA	NA	201216	199200	117525	217657
tr|A0A1D5VB29|A0A1D5VB29_WHEAT	A0A1D5VB29	PFK	ATP-dependent 6-phosphofructokinase OS=Triticum aestivum GN=PFK PE=3 SV=1	268.69	0	7	tr|A0A1D5VB29|A0A1D5VB29_WHEAT	658002	217398	581536	785310	619769	0.43479	0.03125	NA	NA	200918	59006.1	169910	198523
tr|A0A1D5YMG8|A0A1D5YMG8_WHEAT	A0A1D5YMG8	NA	Uncharacterized protein OS=Triticum aestivum PE=3 SV=1	632.09	0	12	tr|A0A1D5YMG8|A0A1D5YMG8_WHEAT	935467	1.48407e+06	246008	469228	702347	0.699505	0.116667	NA	NA	200641	311186	47308.8	99847.8
tr|A0A1D6DI33|A0A1D6DI33_WHEAT	A0A1D6DI33	NA	Uncharacterized protein OS=Triticum aestivum PE=4 SV=1	1076.23	0	13	tr|A0A1D6DI33|A0A1D6DI33_WHEAT	995835	1.10675e+06	1.60997e+06	1.6315e+06	1.35836e+06	0.248491	0.0952381	NA	NA	200098	230742	415713	322094
tr|A0A1D6C5P9|A0A1D6C5P9_WHEAT	A0A1D6C5P9	NA	Purple acid phosphatase OS=Triticum aestivum PE=3 SV=1	352.71	0	8	tr|A0A1D6C5P9|A0A1D6C5P9_WHEAT	1.06654e+06	805594	560584	913531	859562	0.254455	0.0555556	NA	NA	199946	227761	145471	239636
tr|A0A1D6RGB7|A0A1D6RGB7_WHEAT	A0A1D6RGB7	NA	Uncharacterized protein OS=Triticum aestivum PE=4 SV=1	1249.56	0	21	tr|A0A1D6RGB7|A0A1D6RGB7_WHEAT	1.64412e+06	769634	1.10597e+06	1.6756e+06	1.37505e+06	0.338074	0.0555556	NA	NA	199317	125919	138279	238330
tr|A0A1D6BT95|A0A1D6BT95_WHEAT	A0A1D6BT95	NA	Uncharacterized protein OS=Triticum aestivum PE=4 SV=1	694.04	0	14	tr|A0A1D6BT95|A0A1D6BT95_WHEAT	1.03377e+06	747636	1.03251e+06	1.18302e+06	1.03314e+06	0.182146	0.0625	NA	NA	199144	161648	197792	173398
tr|A0A1D6AXV7|A0A1D6AXV7_WHEAT	A0A1D6AXV7	NA	Uncharacterized protein OS=Triticum aestivum PE=4 SV=1	69.83	0.00611309	2	tr|A0A1D6AXV7|A0A1D6AXV7_WHEAT	398121	163317	238460	113744	200889	0.543824	0	NA	NA	199061	81658.5	119230	56872
tr|A0A1D5TDW9|A0A1D5TDW9_WHEAT	A0A1D5TDW9	NA	Uncharacterized protein OS=Triticum aestivum PE=4 SV=1	427.89	0	6	tr|A0A1D5TDW9|A0A1D5TDW9_WHEAT	687532	2.64705e+06	878789	990421	934605	0.696473	0.05	NA	NA	198857	754065	210516	217284
tr|W4ZP51|W4ZP51_WHEAT	W4ZP51	NA	Uncharacterized protein OS=Triticum aestivum PE=4 SV=1	489.51	0	6	tr|W4ZP51|W4ZP51_WHEAT	817110	898777	1.15827e+06	1.59334e+06	1.02853e+06	0.312801	0	NA	NA	198488	264933	326343	466571
tr|A0A1D6DLV3|A0A1D6DLV3_WHEAT	A0A1D6DLV3	NA	Uncharacterized protein OS=Triticum aestivum PE=4 SV=1	681.44	0	13	tr|A0A1D6DLV3|A0A1D6DLV3_WHEAT	1.05151e+06	723023	1.85942e+06	1.82033e+06	1.43592e+06	0.415327	0.125	NA	NA	197091	148516	360914	348575
tr|A0A1D5RVC2|A0A1D5RVC2_WHEAT	A0A1D5RVC2	NA	Uncharacterized protein OS=Triticum aestivum PE=4 SV=1	198.26	0	4	tr|A0A1D5RVC2|A0A1D5RVC2_WHEAT	643958	643037	183151	236233	439635	0.589303	0.05	NA	NA	194205	201089	60451.7	74884.5
tr|A0A1D6CBF2|A0A1D6CBF2_WHEAT	A0A1D6CBF2	NA	Peroxidase OS=Triticum aestivum PE=3 SV=1	646.13	0	9	tr|A0A1D6CBF2|A0A1D6CBF2_WHEAT	1.08378e+06	1.08574e+06	610551	888707	986244	0.244605	0	NA	NA	193349	239961	121207	172713
tr|A0A1D5V2Y6|A0A1D5V2Y6_WHEAT	A0A1D5V2Y6	NA	Uncharacterized protein OS=Triticum aestivum PE=4 SV=1	771.14	0	11	tr|A0A1D5V2Y6|A0A1D5V2Y6_WHEAT	969683	934253	606422	959626	946939	0.201369	0.15625	NA	NA	193312	208903	157312	255270
tr|A0A1D6D8L0|A0A1D6D8L0_WHEAT	A0A1D6D8L0	NA	Uncharacterized protein OS=Triticum aestivum PE=4 SV=1	92.87	0	1	tr|A0A1D6D8L0|A0A1D6D8L0_WHEAT	193040	203218	84125	63012.5	138582	0.534039	0	NA	NA	193040	203218	84125	63012.5
tr|A0A1D5UKZ6|A0A1D5UKZ6_WHEAT	A0A1D5UKZ6	NA	Uncharacterized protein OS=Triticum aestivum PE=4 SV=1	1028.47	0	14	tr|A0A1D5UKZ6|A0A1D5UKZ6_WHEAT	1.15691e+06	1.50932e+06	790043	1.22373e+06	1.19032e+06	0.252853	0.0882353	NA	NA	192297	280522	116393	205083
tr|A0A1D5Y0E0|A0A1D5Y0E0_WHEAT	A0A1D5Y0E0	NA	Uncharacterized protein OS=Triticum aestivum PE=3 SV=1	130.36	0	1	tr|A0A1D5Y0E0|A0A1D5Y0E0_WHEAT	383781	778234	827344	1.26387e+06	802789	0.44271	0.0625	NA	NA	191891	389117	413672	631937
tr|W5BP23|W5BP23_WHEAT	W5BP23	NA	Uncharacterized protein OS=Triticum aestivum PE=4 SV=1	2033.53	0	39	tr|W5BP23|W5BP23_WHEAT	1.83358e+06	2.21403e+06	2.31829e+06	2.1835e+06	2.19877e+06	0.0985208	0.111111	NA	NA	191809	205642	224947	205456
tr|W5BRK9|W5BRK9_WHEAT	W5BRK9	NA	Uncharacterized protein OS=Triticum aestivum PE=3 SV=1	635.34	0	7	tr|W5BRK9|W5BRK9_WHEAT	776706	2.57332e+06	3.98332e+06	4.61852e+06	3.27832e+06	0.570294	0.0576923	NA	NA	191758	705869	1.07837e+06	1.23817e+06
tr|A0A1D5SSC8|A0A1D5SSC8_WHEAT	A0A1D5SSC8	NA	Uncharacterized protein OS=Triticum aestivum PE=4 SV=1	487.54	0	7	tr|A0A1D5SSC8|A0A1D5SSC8_WHEAT	833924	1.18576e+06	1.57127e+06	1.29917e+06	1.24246e+06	0.249834	0.025	NA	NA	191611	325907	451863	366867
tr|A0A1D5W7M9|A0A1D5W7M9_WHEAT	A0A1D5W7M9	NA	Uncharacterized protein OS=Triticum aestivum PE=4 SV=1	795.52	0	10	tr|A0A1D5W7M9|A0A1D5W7M9_WHEAT	953431	1.15754e+06	1.68631e+06	1.29958e+06	1.22856e+06	0.24273	0.142857	NA	NA	191199	258399	381289	298746
tr|A0A0C4BJJ1|A0A0C4BJJ1_WHEAT	A0A0C4BJJ1	NA	Uncharacterized protein OS=Triticum aestivum PE=4 SV=1	737.14	0	10	tr|A0A0C4BJJ1|A0A0C4BJJ1_WHEAT	1.03823e+06	1.57593e+06	2.48667e+06	2.42736e+06	2.00164e+06	0.371767	0.109375	NA	NA	190789	289348	628205	566257
tr|A0A1D6DAG6|A0A1D6DAG6_WHEAT	A0A1D6DAG6	NA	Uncharacterized protein OS=Triticum aestivum PE=3 SV=1	95.64	0.0017585	3	tr|A0A1D6DAG6|A0A1D6DAG6_WHEAT	572331	3.39389e+06	44301.3	31797.5	308316	1.59188	0.166667	NA	NA	190777	1.1313e+06	14767.1	10599.2
tr|W5CWZ2|W5CWZ2_WHEAT	W5CWZ2	TRAES_3BF105300040CFD_c1	Uncharacterized protein OS=Triticum aestivum GN=TRAES_3BF105300040CFD_c1 PE=4 SV=1	427.58	0	6	tr|W5CWZ2|W5CWZ2_WHEAT	573051	1.48401e+06	300786	58460.5	436918	1.03156	0.142857	NA	NA	190571	420961	97064.6	19164.2
tr|A0A1D5S8J8|A0A1D5S8J8_WHEAT	A0A1D5S8J8	NA	Uncharacterized protein OS=Triticum aestivum PE=4 SV=1	326.63	0	4	tr|A0A1D5S8J8|A0A1D5S8J8_WHEAT	588524	613500	428773	797129	601012	0.24858	0.142857	NA	NA	190408	202517	139375	263373
tr|A0A1D6CEH1|A0A1D6CEH1_WHEAT	A0A1D6CEH1	NA	Uncharacterized protein OS=Triticum aestivum PE=4 SV=1	461.06	0	8	tr|A0A1D6CEH1|A0A1D6CEH1_WHEAT	887134	1.18926e+06	1.36361e+06	1.87206e+06	1.27644e+06	0.310739	0	NA	NA	190265	220053	330134	464501
tr|A0A1D5YNX6|A0A1D5YNX6_WHEAT	A0A1D5YNX6	NA	Succinate dehydrogenase [ubiquinone] flavoprotein subunit, mitochondrial OS=Triticum aestivum PE=3 SV=1	843.68	0	14	tr|A0A1D5YNX6|A0A1D5YNX6_WHEAT	1.30943e+06	1.313e+06	1.95061e+06	2.19361e+06	1.6318e+06	0.266228	0.0526316	NA	NA	189871	195373	285862	313192
tr|A0A1D5Y873|A0A1D5Y873_WHEAT	A0A1D5Y873	NA	Uncharacterized protein OS=Triticum aestivum PE=4 SV=1	419	0	8	tr|A0A1D5Y873|A0A1D5Y873_WHEAT	692126	756686	419813	527300	609713	0.256448	0.166667	NA	NA	189453	206879	120849	163045
tr|A0A1D5S4G8|A0A1D5S4G8_WHEAT	A0A1D5S4G8	NA	Golgi apparatus membrane protein TVP23 OS=Triticum aestivum PE=3 SV=1	112.74	0.00189155	1	tr|A0A1D5S4G8|A0A1D5S4G8_WHEAT	189329	15.42	767665	272928	231128	1.06458	0.25	NA	NA	189329	15.42	767665	272928
tr|A0A1D6S144|A0A1D6S144_WHEAT	A0A1D6S144	NA	Uncharacterized protein OS=Triticum aestivum PE=3 SV=1	215.69	0	3	tr|A0A1D6S144|A0A1D6S144_WHEAT	566269	408284	884082	819198	692733	0.331042	0.15	NA	NA	188756	136095	294694	273066
tr|A0A1D6C3I8|A0A1D6C3I8_WHEAT	A0A1D6C3I8	NA	Mitogen-activated protein kinase OS=Triticum aestivum PE=4 SV=1	835.06	0	16	tr|A0A1D6C3I8|A0A1D6C3I8_WHEAT	1.18308e+06	728521	1.27577e+06	1.67868e+06	1.22943e+06	0.32061	0.138889	NA	NA	188169	151144	254077	326142
tr|A0A1D6CZQ4|A0A1D6CZQ4_WHEAT	A0A1D6CZQ4	NA	Uncharacterized protein OS=Triticum aestivum PE=4 SV=1	274.11	0	6	tr|A0A1D6CZQ4|A0A1D6CZQ4_WHEAT	616925	795440	560071	642792	629859	0.153784	0.0833333	NA	NA	186576	238700	165036	179522
tr|A0A1D5Z7E3|A0A1D5Z7E3_WHEAT	A0A1D5Z7E3	NA	Serine/threonine-protein phosphatase OS=Triticum aestivum PE=3 SV=1	215.89	0	3	tr|A0A1D5Z7E3|A0A1D5Z7E3_WHEAT	557887	76444.6	697970	1.14261e+06	627928	0.709729	0.0625	NA	NA	185962	25481.5	232657	380869
tr|A0A1D5RXW7|A0A1D5RXW7_WHEAT	A0A1D5RXW7	NA	Uncharacterized protein OS=Triticum aestivum PE=4 SV=1	161.35	0	3	tr|A0A1D5RXW7|A0A1D5RXW7_WHEAT	555449	647260	1.03277e+06	678561	662911	0.28752	0.0625	NA	NA	185150	215753	344258	226187
tr|A0A1D6AMD2|A0A1D6AMD2_WHEAT	A0A1D6AMD2	NA	Peroxidase OS=Triticum aestivum PE=3 SV=1	948.85	0	11	tr|A0A1D6AMD2|A0A1D6AMD2_WHEAT	1.24162e+06	1.62616e+06	828665	1.49716e+06	1.36939e+06	0.270772	0	NA	NA	184902	304472	123285	310259
tr|A0A077S2S8|A0A077S2S8_WHEAT	A0A077S2S8	TRAES_3BF159000030CFD_c1	Uncharacterized protein OS=Triticum aestivum GN=TRAES_3BF159000030CFD_c1 PE=4 SV=1	60.46	0.00765184	1	tr|A0A077S2S8|A0A077S2S8_WHEAT	184592	25411	406551	243303	213947	0.732398	0.375	NA	NA	184592	25411	406551	243303
tr|A0A1D5ZKQ5|A0A1D5ZKQ5_WHEAT	A0A1D5ZKQ5	NA	Uncharacterized protein OS=Triticum aestivum PE=4 SV=1	560.99	0	8	tr|A0A1D5ZKQ5|A0A1D5ZKQ5_WHEAT	689853	1.26819e+06	460538	1.19949e+06	944670	0.434071	0.104167	NA	NA	184204	335532	135408	342929
tr|A0A1D5RYJ8|A0A1D5RYJ8_WHEAT	A0A1D5RYJ8	NA	Pyruvate kinase OS=Triticum aestivum PE=3 SV=1	432.87	0	10	tr|A0A1D5RYJ8|A0A1D5RYJ8_WHEAT	795956	1.14083e+06	709025	469963	752491	0.356706	0.0384615	NA	NA	183145	244602	120523	90975
tr|A0A1D5Y8D5|A0A1D5Y8D5_WHEAT	A0A1D5Y8D5	NA	Uncharacterized protein OS=Triticum aestivum PE=4 SV=1	828.63	0	12	tr|A0A1D5Y8D5|A0A1D5Y8D5_WHEAT	1.08104e+06	1.21516e+06	901746	1.04766e+06	1.06435e+06	0.121272	0.132353	NA	NA	182767	213807	194421	179978
tr|A0A1D6BRR4|A0A1D6BRR4_WHEAT	A0A1D6BRR4	NA	Phospholipase D OS=Triticum aestivum PE=3 SV=1	82.73	0.00274876	1	tr|A0A1D6BRR4|A0A1D6BRR4_WHEAT	182400	304075	603030	484193	394134	0.474817	0	NA	NA	182400	304075	603030	484193
tr|A0A1D5TN85|A0A1D5TN85_WHEAT	A0A1D5TN85	NA	Uncharacterized protein OS=Triticum aestivum PE=4 SV=1	797.84	0	11	tr|A0A1D5TN85|A0A1D5TN85_WHEAT	1.17473e+06	976219	1.40744e+06	1.56628e+06	1.29109e+06	0.202315	0.107143	NA	NA	181437	158904	319702	346615
tr|A0A1D5YUV3|A0A1D5YUV3_WHEAT	A0A1D5YUV3	NA	Uncharacterized protein OS=Triticum aestivum PE=3 SV=1	446.82	0	6	tr|A0A1D5YUV3|A0A1D5YUV3_WHEAT	682670	396451	2.36511e+06	1.1577e+06	920184	0.754886	0.0555556	NA	NA	180725	108160	726550	340821
tr|A0A1D5SZI3|A0A1D5SZI3_WHEAT	A0A1D5SZI3	NA	Uncharacterized protein OS=Triticum aestivum PE=4 SV=1	899.87	0	11	tr|A0A1D5SZI3|A0A1D5SZI3_WHEAT	1.22341e+06	792065	272425	348583	570324	0.668281	0.1875	NA	NA	180681	134572	79967.4	99060.4
tr|A0A1D6AQF5|A0A1D6AQF5_WHEAT	A0A1D6AQF5	NA	Uncharacterized protein OS=Triticum aestivum PE=4 SV=1	1044.6	0	14	tr|A0A1D6AQF5|A0A1D6AQF5_WHEAT	1.22384e+06	913587	1.76688e+06	2.07351e+06	1.49536e+06	0.349869	0.0795455	NA	NA	179983	164454	268513	378716
tr|A0A1D6S9C6|A0A1D6S9C6_WHEAT	A0A1D6S9C6	NA	Uncharacterized protein OS=Triticum aestivum PE=4 SV=1	435.74	0	13	tr|A0A1D6S9C6|A0A1D6S9C6_WHEAT	1.05944e+06	362237	302473	461774	412005	0.637217	0.160714	NA	NA	179890	78892.9	62299.5	109858
tr|A0A1D5Y217|A0A1D5Y217_WHEAT	A0A1D5Y217	NA	Uncharacterized protein OS=Triticum aestivum PE=4 SV=1	923.71	0	21	tr|A0A1D5Y217|A0A1D5Y217_WHEAT	1.30287e+06	1.03834e+06	1.1186e+06	1.92485e+06	1.21073e+06	0.298156	0.0952381	NA	NA	179424	199684	131473	232979
tr|A0A1D5XX38|A0A1D5XX38_WHEAT	A0A1D5XX38	NA	Uncharacterized protein OS=Triticum aestivum PE=4 SV=1	395.24	0	7	tr|A0A1D5XX38|A0A1D5XX38_WHEAT	660146	832565	231404	302446	481296	0.56663	0.145833	NA	NA	179166	257287	68149.6	94038.5
tr|A0A1D5YNA3|A0A1D5YNA3_WHEAT	A0A1D5YNA3	NA	Uncharacterized protein OS=Triticum aestivum PE=4 SV=1	203.6	0	4	tr|A0A1D5YNA3|A0A1D5YNA3_WHEAT	574310	680490	206306	414162	494236	0.44031	0.05	NA	NA	179089	225856	64714.7	135143
tr|A0A1D5TFS9|A0A1D5TFS9_WHEAT	A0A1D5TFS9	NA	Peroxidase OS=Triticum aestivum PE=3 SV=1	313.6	0	6	tr|A0A1D5TFS9|A0A1D5TFS9_WHEAT	668371	660496	200605	459200	559848	0.442777	0.0625	NA	NA	179056	156330	64372.1	151540
tr|A0A1D5VZF2|A0A1D5VZF2_WHEAT	A0A1D5VZF2	NA	Uncharacterized protein OS=Triticum aestivum PE=4 SV=1	260.46	0	5	tr|A0A1D5VZF2|A0A1D5VZF2_WHEAT	560445	231517	612406	370296	465371	0.395782	0.125	NA	NA	178917	74411.3	175805	107344
tr|A0A173FEH2|A0A173FEH2_WHEAT	A0A173FEH2	tsk1	TSK1 protein OS=Triticum aestivum GN=tsk1 PE=2 SV=1	466.22	0	7	tr|A0A173FEH2|A0A173FEH2_WHEAT	603432	784846	342149	524995	564213	0.325518	0.05	NA	NA	178515	221207	81618.9	108968
tr|A0A1D5W7J4|A0A1D5W7J4_WHEAT	A0A1D5W7J4	NA	Uncharacterized protein OS=Triticum aestivum PE=4 SV=1	803.42	0	15	tr|A0A1D5W7J4|A0A1D5W7J4_WHEAT	1.20963e+06	1.18864e+06	1.18802e+06	721806	1.18833e+06	0.220075	0.144737	NA	NA	178004	211121	215330	131542
tr|W5FMJ1|W5FMJ1_WHEAT	W5FMJ1	NA	Uncharacterized protein OS=Triticum aestivum PE=4 SV=1	77.84	0.00319489	1	tr|W5FMJ1|W5FMJ1_WHEAT	177422	375284	110414	149360	163391	0.581029	0	NA	NA	177422	375284	110414	149360
tr|A0A1D5TK59|A0A1D5TK59_WHEAT	A0A1D5TK59	NA	Uncharacterized protein OS=Triticum aestivum PE=3 SV=1	358.5	0	7	tr|A0A1D5TK59|A0A1D5TK59_WHEAT	665109	555163	565921	1.15137e+06	615515	0.384478	0.03125	NA	NA	177084	168372	102916	270005
tr|A0A1D6S5Y2|A0A1D6S5Y2_WHEAT	A0A1D6S5Y2	NA	Histone H2B OS=Triticum aestivum PE=3 SV=1	207.7	0	3	tr|A0A1D6S5Y2|A0A1D6S5Y2_WHEAT	529462	270460	1.23397e+06	598351	563907	0.621628	0.1875	NA	NA	176487	90153.3	411325	199450
tr|A0A1D6S1U7|A0A1D6S1U7_WHEAT	A0A1D6S1U7	NA	Uncharacterized protein OS=Triticum aestivum PE=3 SV=1	344.9	0	3	tr|A0A1D6S1U7|A0A1D6S1U7_WHEAT	527863	372850	211763	177185	292307	0.500399	0.0714286	NA	NA	175954	124283	70587.8	59061.6
sp|Q9ZRB0|TBB3_WHEAT	Q9ZRB0	TUBB3	Tubulin beta-3 chain OS=Triticum aestivum GN=TUBB3 PE=2 SV=1	92.2	0.00172612	2	sp|Q9ZRB0|TBB3_WHEAT	351332	324984	75349.5	269393	297188	0.488557	0	NA	NA	175666	162492	37674.8	134696
tr|A0A1D5ZW55|A0A1D5ZW55_WHEAT	A0A1D5ZW55	NA	Uncharacterized protein OS=Triticum aestivum PE=4 SV=1	877.15	0	18	tr|A0A1D5ZW55|A0A1D5ZW55_WHEAT	1.00585e+06	1.31001e+06	489365	514578	760214	0.480375	0.0875	NA	NA	175605	202178	103524	98663.4
tr|A0A1D5YM43|A0A1D5YM43_WHEAT	A0A1D5YM43	NA	Uncharacterized protein OS=Triticum aestivum PE=3 SV=1	127.19	0	1	tr|A0A1D5YM43|A0A1D5YM43_WHEAT	174736	338787	43824.5	93272.7	134004	0.794519	0	NA	NA	174736	338787	43824.5	93272.7
tr|A0A1D5YLP6|A0A1D5YLP6_WHEAT	A0A1D5YLP6	NA	Uncharacterized protein OS=Triticum aestivum PE=4 SV=1	188.12	0	3	tr|A0A1D5YLP6|A0A1D5YLP6_WHEAT	523496	568306	165575	547501	535499	0.42398	0.0833333	NA	NA	174499	189435	55191.5	182500
tr|A0A1D6DDI3|A0A1D6DDI3_WHEAT	A0A1D6DDI3	NA	Uncharacterized protein OS=Triticum aestivum PE=3 SV=1	119.58	0.000649773	2	tr|A0A1D6DDI3|A0A1D6DDI3_WHEAT	522585	618754	209300	344225	433405	0.431121	0	NA	NA	174195	206251	69766.6	114742
tr|A0A1D5Z0D3|A0A1D5Z0D3_WHEAT	A0A1D5Z0D3	NA	Uncharacterized protein OS=Triticum aestivum PE=4 SV=1	625.74	0	12	tr|A0A1D5Z0D3|A0A1D5Z0D3_WHEAT	618071	778835	224459	350838	484454	0.509971	0.125	NA	NA	174137	227066	41377.7	75491.6
tr|A0A077RZZ9|A0A077RZZ9_WHEAT	A0A077RZZ9	TRAES_3BF047700020CFD_c1	Uncharacterized protein OS=Triticum aestivum GN=TRAES_3BF047700020CFD_c1 PE=3 SV=1	366.19	0	7	tr|A0A077RZZ9|A0A077RZZ9_WHEAT	597117	527499	437405	526538	527019	0.125343	0.0277778	NA	NA	173892	147887	109814	127610
tr|A0A0H2UIB6|A0A0H2UIB6_WHEAT	A0A0H2UIB6	NA	Uncharacterized protein OS=Triticum aestivum PE=3 SV=1	881.11	0	12	tr|A0A0H2UIB6|A0A0H2UIB6_WHEAT	1.19016e+06	1.48327e+06	2.43091e+06	2.70917e+06	1.95709e+06	0.374186	0.118421	NA	NA	173719	237450	369339	488759
tr|A0A1D6B4M9|A0A1D6B4M9_WHEAT	A0A1D6B4M9	NA	Uncharacterized protein OS=Triticum aestivum PE=4 SV=1	205.98	0	3	tr|A0A1D6B4M9|A0A1D6B4M9_WHEAT	520748	383410	332870	238036	358140	0.319678	0	NA	NA	173583	127803	110957	79345.5
tr|A0A1D6SC42|A0A1D6SC42_WHEAT	A0A1D6SC42	NA	Uncharacterized protein OS=Triticum aestivum PE=3 SV=1	777.64	0	14	tr|A0A1D6SC42|A0A1D6SC42_WHEAT	630142	941797	557408	1.0703e+06	785969	0.306962	0.161765	NA	NA	173032	190239	110881	203878
tr|W5B368|W5B368_WHEAT	W5B368	NA	Uncharacterized protein OS=Triticum aestivum PE=3 SV=1	418.28	0	6	tr|W5B368|W5B368_WHEAT	571789	469985	434975	463715	466850	0.123184	0.222222	NA	NA	172711	128824	116087	140169
tr|W5E562|W5E562_WHEAT	W5E562	NA	Uncharacterized protein OS=Triticum aestivum PE=3 SV=1	1882.93	0	22	tr|W5E562|W5E562_WHEAT	1.82476e+06	2.39868e+06	1.73159e+06	2.78215e+06	2.11172e+06	0.227006	0.0955882	NA	NA	172676	208062	229997	399116
tr|A0A1D5SY54|A0A1D5SY54_WHEAT	A0A1D5SY54	NA	Uncharacterized protein OS=Triticum aestivum PE=4 SV=1	493.21	0	5	tr|A0A1D5SY54|A0A1D5SY54_WHEAT	586407	867789	770144	866722	818433	0.17134	0.222222	NA	NA	172132	261162	222244	273668
tr|A0A1D5RYT0|A0A1D5RYT0_WHEAT	A0A1D5RYT0	NA	Uncharacterized protein OS=Triticum aestivum PE=4 SV=1	940.91	0	15	tr|A0A1D5RYT0|A0A1D5RYT0_WHEAT	927098	1.34965e+06	813858	902467	914782	0.239663	0.105263	NA	NA	172009	261962	182192	242741
tr|A0A1D5RQE5|A0A1D5RQE5_WHEAT	A0A1D5RQE5	NA	Uncharacterized protein OS=Triticum aestivum PE=3 SV=1	956.54	0	15	tr|A0A1D5RQE5|A0A1D5RQE5_WHEAT	900385	855218	843618	1.09958e+06	877802	0.128832	0.131579	NA	NA	171994	168898	157131	197660
tr|A0A1D6B7D9|A0A1D6B7D9_WHEAT	A0A1D6B7D9	NA	Uncharacterized protein OS=Triticum aestivum PE=4 SV=1	42.26	0	1	tr|A0A1D6B7D9|A0A1D6B7D9_WHEAT	171920	60042.6	5091.69	66645.1	63343.9	0.917903	0	NA	NA	171920	60042.6	5091.69	66645.1
tr|A0A1D5XPB2|A0A1D5XPB2_WHEAT	A0A1D5XPB2	NA	Uncharacterized protein OS=Triticum aestivum PE=4 SV=1	538.22	0	8	tr|A0A1D5XPB2|A0A1D5XPB2_WHEAT	907671	969333	573347	601659	754665	0.268064	0	NA	NA	171668	227756	151427	157477
tr|W4ZTE1|W4ZTE1_WHEAT	W4ZTE1	NA	Uncharacterized protein OS=Triticum aestivum PE=3 SV=1	608.1	0	10	tr|W4ZTE1|W4ZTE1_WHEAT	913250	511152	253624	358294	434723	0.568584	0.025	NA	NA	171351	115668	58094.5	94208.7
tr|A0A0C4BJE3|A0A0C4BJE3_WHEAT	A0A0C4BJE3	NA	Ribosomal protein OS=Triticum aestivum PE=3 SV=1	442.43	0	2	tr|A0A0C4BJE3|A0A0C4BJE3_WHEAT	342462	1.57982e+06	1.2928e+06	1.6591e+06	1.43631e+06	0.496397	0.05	NA	NA	171231	789912	646398	829550
tr|W5FEA0|W5FEA0_WHEAT	W5FEA0	NA	Uncharacterized protein OS=Triticum aestivum PE=3 SV=1	706.78	0	9	tr|W5FEA0|W5FEA0_WHEAT	685001	1.13064e+06	1.29863e+06	1.3898e+06	1.21463e+06	0.277964	0.263889	NA	NA	171181	221481	249743	285787
tr|A0A1D6C056|A0A1D6C056_WHEAT	A0A1D6C056	NA	Uncharacterized protein OS=Triticum aestivum PE=4 SV=1	2097.69	0	33	tr|A0A1D6C056|A0A1D6C056_WHEAT	1.94094e+06	2.6403e+06	2.57454e+06	2.77374e+06	2.60742e+06	0.149192	0.0914634	NA	NA	170906	276096	284566	293400
tr|W5AUH7|W5AUH7_WHEAT	W5AUH7	NA	Uncharacterized protein OS=Triticum aestivum PE=4 SV=1	405.95	0	8	tr|W5AUH7|W5AUH7_WHEAT	698696	804965	2.69469e+06	2.93412e+06	1.74983e+06	0.670522	0.05	NA	NA	170752	237121	692747	791806
tr|A0A1D5YL78|A0A1D5YL78_WHEAT	A0A1D5YL78	NA	Uncharacterized protein OS=Triticum aestivum PE=4 SV=1	134.56	0	2	tr|A0A1D5YL78|A0A1D5YL78_WHEAT	341232	394749	157773	147585	249502	0.485084	0.0833333	NA	NA	170616	197375	78886.4	73792.3
tr|A0A1D5TNY3|A0A1D5TNY3_WHEAT	A0A1D5TNY3	NA	Uncharacterized protein OS=Triticum aestivum PE=4 SV=1	150.42	0	2	tr|A0A1D5TNY3|A0A1D5TNY3_WHEAT	511756	756688	353577	470200	490978	0.324128	0	NA	NA	170585	252229	117859	156733
tr|A0A1D6BD26|A0A1D6BD26_WHEAT	A0A1D6BD26	NA	Uncharacterized protein OS=Triticum aestivum PE=4 SV=1	331.11	0	6	tr|A0A1D6BD26|A0A1D6BD26_WHEAT	522787	568869	110483	76429	316635	0.820363	0.0833333	NA	NA	170488	170433	32597.3	25240.5
tr|A0A1D6AL13|A0A1D6AL13_WHEAT	A0A1D6AL13	NA	Uncharacterized protein OS=Triticum aestivum PE=4 SV=1	1049.94	0	19	tr|A0A1D6AL13|A0A1D6AL13_WHEAT	1.2039e+06	1.82235e+06	1.32629e+06	1.34378e+06	1.33503e+06	0.191499	0.105769	NA	NA	170483	271338	304593	269715
tr|A0A1D6CKK8|A0A1D6CKK8_WHEAT	A0A1D6CKK8	NA	Uncharacterized protein OS=Triticum aestivum PE=4 SV=1	471.24	0	7	tr|A0A1D6CKK8|A0A1D6CKK8_WHEAT	722253	541093	593644	683283	638464	0.130081	0.09375	NA	NA	170014	155341	163966	201245
tr|A0A1D5YCW2|A0A1D5YCW2_WHEAT	A0A1D5YCW2	NA	Eukaryotic translation initiation factor 3 subunit C OS=Triticum aestivum PE=3 SV=1	426.32	0	9	tr|A0A1D5YCW2|A0A1D5YCW2_WHEAT	829196	222045	621553	387629	504591	0.516218	0.104167	NA	NA	170008	59412.7	147124	77745.5
tr|A0A1D5T4G2|A0A1D5T4G2_WHEAT	A0A1D5T4G2	NA	Uncharacterized protein OS=Triticum aestivum PE=4 SV=1	334.66	0	5	tr|A0A1D5T4G2|A0A1D5T4G2_WHEAT	559620	474830	1.79707e+06	5.92179e+06	1.17834e+06	1.17043	0	NA	NA	168767	138327	587525	1.95627e+06
tr|W5BAG0|W5BAG0_WHEAT	W5BAG0	NA	Peroxidase OS=Triticum aestivum PE=3 SV=1	869.36	0	12	tr|W5BAG0|W5BAG0_WHEAT	933537	699975	765612	1.02308e+06	849575	0.173943	0.144737	NA	NA	168412	134469	167572	230268
tr|A0A1D5YN62|A0A1D5YN62_WHEAT	A0A1D5YN62	NA	Uncharacterized protein OS=Triticum aestivum PE=3 SV=1	390.3	0	5	tr|A0A1D5YN62|A0A1D5YN62_WHEAT	588927	859068	271888	303803	446365	0.543983	0.0277778	NA	NA	168378	243918	73884.6	84219.9
tr|W5C9J7|W5C9J7_WHEAT	W5C9J7	NA	Uncharacterized protein OS=Triticum aestivum PE=4 SV=1	850.68	0	14	tr|W5C9J7|W5C9J7_WHEAT	861795	801208	442649	664167	732688	0.268504	0.25	NA	NA	168185	162327	89563.7	125845
tr|W5FEZ3|W5FEZ3_WHEAT	W5FEZ3	NA	40S ribosomal protein S12 OS=Triticum aestivum PE=3 SV=1	222.95	0	5	tr|W5FEZ3|W5FEZ3_WHEAT	583964	362374	348678	367056	364715	0.270909	0.0833333	NA	NA	168177	107755	116216	121086
tr|A0A1D5YN92|A0A1D5YN92_WHEAT	A0A1D5YN92	NA	Uncharacterized protein OS=Triticum aestivum PE=4 SV=1	128.61	0	2	tr|A0A1D5YN92|A0A1D5YN92_WHEAT	336275	95354.3	1.59035e+06	1.79805e+06	963312	0.904043	0	NA	NA	168137	47677.2	795175	899023
tr|A0A1D5SQC0|A0A1D5SQC0_WHEAT	A0A1D5SQC0	NA	Uncharacterized protein OS=Triticum aestivum PE=4 SV=1	916.49	0	14	tr|A0A1D5SQC0|A0A1D5SQC0_WHEAT	747638	665885	479871	599586	632736	0.181547	0.208333	NA	NA	167988	141679	118965	160287
tr|A0A1D6C0X6|A0A1D6C0X6_WHEAT	A0A1D6C0X6	NA	Ribonucleoside-diphosphate reductase OS=Triticum aestivum PE=3 SV=1	935.9	0	17	tr|A0A1D6C0X6|A0A1D6C0X6_WHEAT	1.22537e+06	1.14695e+06	791030	808349	977652	0.227131	0.0652174	NA	NA	167673	161194	113194	132443
tr|A0A1D5VUB7|A0A1D5VUB7_WHEAT	A0A1D5VUB7	NA	Uncharacterized protein OS=Triticum aestivum PE=3 SV=1	887.5	0	15	tr|A0A1D5VUB7|A0A1D5VUB7_WHEAT	1.13547e+06	1.18399e+06	694142	846916	991194	0.242496	0.0972222	NA	NA	166560	151829	141330	180205
tr|A0A1D5SHH8|A0A1D5SHH8_WHEAT	A0A1D5SHH8	NA	Uncharacterized protein OS=Triticum aestivum PE=4 SV=1	491.98	0	9	tr|A0A1D5SHH8|A0A1D5SHH8_WHEAT	639061	434823	877280	906625	758170	0.31017	0.211538	NA	NA	166234	109439	267227	265123
tr|A0A1D5TE82|A0A1D5TE82_WHEAT	A0A1D5TE82	NA	Uncharacterized protein OS=Triticum aestivum PE=4 SV=1	846.62	0	14	tr|A0A1D5TE82|A0A1D5TE82_WHEAT	1.20967e+06	1.08757e+06	507257	735226	911398	0.364172	0.078125	NA	NA	166209	157401	90253.3	120140
tr|A0A1D5WSS8|A0A1D5WSS8_WHEAT	A0A1D5WSS8	NA	Non-specific lipid-transfer protein OS=Triticum aestivum PE=3 SV=1	204.25	0	2	tr|A0A1D5WSS8|A0A1D5WSS8_WHEAT	328875	126857	109082	89770.2	117969	0.679449	0.0833333	NA	NA	164438	63428.3	54540.8	44885.1
tr|A0A1D5TES2|A0A1D5TES2_WHEAT	A0A1D5TES2	NA	Peroxidase OS=Triticum aestivum PE=3 SV=1	304.9	0	3	tr|A0A1D5TES2|A0A1D5TES2_WHEAT	493619	683704	892731	1.12336e+06	788217	0.33962	0.178571	NA	NA	164187	225944	291142	372125
tr|A0A1D5Y402|A0A1D5Y402_WHEAT	A0A1D5Y402	NA	Uncharacterized protein OS=Triticum aestivum PE=4 SV=1	438.29	0	9	tr|A0A1D5Y402|A0A1D5Y402_WHEAT	639660	581106	484709	536836	558971	0.117407	0.159091	NA	NA	163927	150402	125197	135362
tr|A0A1D5VTL0|A0A1D5VTL0_WHEAT	A0A1D5VTL0	NA	Uncharacterized protein OS=Triticum aestivum PE=4 SV=1	55.61	0.00926355	1	tr|A0A1D5VTL0|A0A1D5VTL0_WHEAT	163667	125871	13788.8	30968.9	78420.1	0.869486	0	NA	NA	163667	125871	13788.8	30968.9
tr|A0A1D5SV44|A0A1D5SV44_WHEAT	A0A1D5SV44	NA	Uncharacterized protein OS=Triticum aestivum PE=4 SV=1	107.79	0	2	tr|A0A1D5SV44|A0A1D5SV44_WHEAT	324353	305213	184766	211569	258391	0.267696	0	NA	NA	162176	152606	92383	105785
tr|A0A1D5VFP5|A0A1D5VFP5_WHEAT	A0A1D5VFP5	NA	Uncharacterized protein OS=Triticum aestivum PE=4 SV=1	307.49	0	5	tr|A0A1D5VFP5|A0A1D5VFP5_WHEAT	625027	444312	300858	331827	388069	0.344533	0.125	NA	NA	161654	145337	97634.1	110593
tr|A0A1D5YJW5|A0A1D5YJW5_WHEAT	A0A1D5YJW5	NA	Uncharacterized protein OS=Triticum aestivum PE=4 SV=1	740.67	0	10	tr|A0A1D5YJW5|A0A1D5YJW5_WHEAT	816265	847650	661195	968414	831958	0.15359	0.05	NA	NA	161433	182898	165452	245666
tr|A0A1D6C4J9|A0A1D6C4J9_WHEAT	A0A1D6C4J9	NA	Uncharacterized protein OS=Triticum aestivum PE=4 SV=1	479.27	0	7	tr|A0A1D6C4J9|A0A1D6C4J9_WHEAT	588683	497269	288278	333455	415362	0.328692	0.0681818	NA	NA	161288	132452	81325	91677.7
tr|A0A1D5U8V3|A0A1D5U8V3_WHEAT	A0A1D5U8V3	NA	Ribosomal protein L19 OS=Triticum aestivum PE=3 SV=1	312.33	0	3	tr|A0A1D5U8V3|A0A1D5U8V3_WHEAT	483505	2.38031e+06	2.88115e+06	2.61803e+06	2.49917e+06	0.521749	0.0416667	NA	NA	161168	793437	960384	872676
tr|A0A1D5XM60|A0A1D5XM60_WHEAT	A0A1D5XM60	NA	Uncharacterized protein OS=Triticum aestivum PE=4 SV=1	366.07	0	7	tr|A0A1D5XM60|A0A1D5XM60_WHEAT	547106	409917	321224	376169	393043	0.232626	0.138889	NA	NA	160835	124058	95750.6	112023
tr|A0A1D5Y0P8|A0A1D5Y0P8_WHEAT	A0A1D5Y0P8	NA	Translocase of chloroplast OS=Triticum aestivum PE=3 SV=1	371.17	0	10	tr|A0A1D5Y0P8|A0A1D5Y0P8_WHEAT	596448	485103	680353	906439	638401	0.267563	0.1	NA	NA	160808	149048	141749	194125
tr|A0A1D5Z640|A0A1D5Z640_WHEAT	A0A1D5Z640	NA	Protein transport protein Sec61 subunit beta OS=Triticum aestivum PE=3 SV=1	167.04	0	3	tr|A0A1D5Z640|A0A1D5Z640_WHEAT	481479	600143	31911.2	100020	290750	0.9222	0.25	NA	NA	160493	200048	10637.1	33340
tr|A0A1D6AX02|A0A1D6AX02_WHEAT	A0A1D6AX02	NA	Uncharacterized protein OS=Triticum aestivum PE=4 SV=1	92.86	0	2	tr|A0A1D6AX02|A0A1D6AX02_WHEAT	320798	3329.22	16050.8	120998	68524.5	1.27326	0.125	NA	NA	160399	1664.61	8025.42	60499.1
tr|A0A1D5XGN6|A0A1D5XGN6_WHEAT	A0A1D5XGN6	NA	Uncharacterized protein OS=Triticum aestivum PE=4 SV=1	290.13	0	6	tr|A0A1D5XGN6|A0A1D5XGN6_WHEAT	590545	361183	249546	291280	326231	0.407568	0.166667	NA	NA	160326	119356	67733.1	80276.7
tr|A0A1D6D9Q1|A0A1D6D9Q1_WHEAT	A0A1D6D9Q1	NA	Uncharacterized protein OS=Triticum aestivum PE=4 SV=1	694.39	0	19	tr|A0A1D6D9Q1|A0A1D6D9Q1_WHEAT	942378	1.15309e+06	1.40127e+06	1.37902e+06	1.26606e+06	0.177028	0.115385	NA	NA	160307	168020	240487	207092
tr|A0A1D5SXD3|A0A1D5SXD3_WHEAT	A0A1D5SXD3	NA	Uncharacterized protein OS=Triticum aestivum PE=4 SV=1	819.78	0	12	tr|A0A1D5SXD3|A0A1D5SXD3_WHEAT	537609	701776	3.86465e+06	1.9416e+06	1.32169e+06	0.871949	0.234375	NA	NA	159353	215041	748603	426491
tr|A0A1D5S3T9|A0A1D5S3T9_WHEAT	A0A1D5S3T9	NA	Uncharacterized protein OS=Triticum aestivum PE=4 SV=1	1586.9	0	30	tr|A0A1D5S3T9|A0A1D5S3T9_WHEAT	1.57054e+06	1.52368e+06	1.64158e+06	1.66597e+06	1.60606e+06	0.0407692	0.0857143	NA	NA	158192	158809	254540	320265
tr|A0A1D5V9V2|A0A1D5V9V2_WHEAT	A0A1D5V9V2	NA	Uncharacterized protein OS=Triticum aestivum PE=4 SV=1	249.53	0	2	tr|A0A1D5V9V2|A0A1D5V9V2_WHEAT	316363	338916	343779	416547	341348	0.12274	0	NA	NA	158182	169458	171889	208273
tr|A0A1D5RVP0|A0A1D5RVP0_WHEAT	A0A1D5RVP0	NA	Uncharacterized protein OS=Triticum aestivum PE=4 SV=1	570.16	0	13	tr|A0A1D5RVP0|A0A1D5RVP0_WHEAT	906705	729491	693368	873168	801330	0.131147	0.140625	NA	NA	157843	117977	161476	209142
tr|A0A1D5VAL5|A0A1D5VAL5_WHEAT	A0A1D5VAL5	NA	Uncharacterized protein OS=Triticum aestivum PE=4 SV=1	630.63	0	10	tr|A0A1D5VAL5|A0A1D5VAL5_WHEAT	881462	687886	677703	590991	682795	0.172797	0.104167	NA	NA	157791	135850	136460	105292
tr|A0A1D6B538|A0A1D6B538_WHEAT	A0A1D6B538	NA	Uncharacterized protein OS=Triticum aestivum PE=4 SV=1	439.48	0	7	tr|A0A1D6B538|A0A1D6B538_WHEAT	738906	671318	603764	571358	637541	0.115184	0.125	NA	NA	157032	143509	195416	173914
tr|A0A1D5X3A8|A0A1D5X3A8_WHEAT	A0A1D5X3A8	NA	Eukaryotic translation initiation factor 3 subunit I OS=Triticum aestivum PE=3 SV=1	722.01	0	15	tr|A0A1D5X3A8|A0A1D5X3A8_WHEAT	947215	842665	527424	1.00119e+06	894940	0.255466	0.102941	NA	NA	156988	192054	111913	194506
tr|W5EP36|W5EP36_WHEAT	W5EP36	NA	Pescadillo homolog OS=Triticum aestivum PE=3 SV=1	436.4	0	11	tr|W5EP36|W5EP36_WHEAT	538498	611134	616699	854339	613917	0.209835	0.0961538	NA	NA	156185	160229	141545	166671
tr|W5B1B3|W5B1B3_WHEAT	W5B1B3	NA	Uncharacterized protein OS=Triticum aestivum PE=4 SV=1	266.13	0	4	tr|W5B1B3|W5B1B3_WHEAT	509879	465105	232533	268474	366789	0.376205	0	NA	NA	156075	140896	63197.7	85722.8
tr|A0A1D5RY72|A0A1D5RY72_WHEAT	A0A1D5RY72	NA	GTP-binding nuclear protein OS=Triticum aestivum PE=3 SV=1	385.41	0	7	tr|A0A1D5RY72|A0A1D5RY72_WHEAT	647428	764023	746652	781473	755337	0.0816698	0.0625	NA	NA	154788	223256	231225	242023
tr|A0A1D6CDA2|A0A1D6CDA2_WHEAT	A0A1D6CDA2	NA	Uncharacterized protein OS=Triticum aestivum PE=4 SV=1	129.37	0	1	tr|A0A1D6CDA2|A0A1D6CDA2_WHEAT	154064	175784	77446.8	47272.1	115756	0.537919	0.25	NA	NA	154064	175784	77446.8	47272.1
tr|A0A1D5W1W1|A0A1D5W1W1_WHEAT	A0A1D5W1W1	NA	FRIGIDA-like protein OS=Triticum aestivum PE=3 SV=1	91.09	0.00171821	2	tr|A0A1D5W1W1|A0A1D5W1W1_WHEAT	307947	436578	54.5792	214.516	154081	1.18783	0.25	NA	NA	153973	218289	27.2896	107.258
tr|A0A077RZ13|A0A077RZ13_WHEAT	A0A077RZ13	TRAES_3BF077600090CFD_c1	Uncharacterized protein OS=Triticum aestivum GN=TRAES_3BF077600090CFD_c1 PE=3 SV=1	305.77	0	4	tr|A0A077RZ13|A0A077RZ13_WHEAT	462135	517989	907295	517874	517932	0.342029	0.05	NA	NA	153841	169011	302425	172620
tr|A0A1D5UVN1|A0A1D5UVN1_WHEAT	A0A1D5UVN1	NA	Uncharacterized protein OS=Triticum aestivum PE=4 SV=1	336.77	0	5	tr|A0A1D5UVN1|A0A1D5UVN1_WHEAT	544394	230619	276396	454079	365238	0.39262	0.0833333	NA	NA	153684	72443.3	69780	129458
tr|A0A1D5Z7K2|A0A1D5Z7K2_WHEAT	A0A1D5Z7K2	NA	Uncharacterized protein OS=Triticum aestivum PE=3 SV=1	114.98	0.00190476	4	tr|A0A1D5Z7K2|A0A1D5Z7K2_WHEAT	466011	369613	442119	995406	454065	0.506224	0	NA	NA	153381	121864	146979	331629
tr|A0A1D5Z4H8|A0A1D5Z4H8_WHEAT	A0A1D5Z4H8	NA	Uncharacterized protein OS=Triticum aestivum PE=3 SV=1	273.29	0	6	tr|A0A1D5Z4H8|A0A1D5Z4H8_WHEAT	516880	519378	250200	439090	477985	0.293034	0.0625	NA	NA	153149	161173	51079.3	126042
tr|W5E5R0|W5E5R0_WHEAT	W5E5R0	NA	Uncharacterized protein OS=Triticum aestivum PE=3 SV=1	207.51	0	3	tr|W5E5R0|W5E5R0_WHEAT	458492	457604	109268	108078	283436	0.711859	0.0625	NA	NA	152831	152535	36422.5	36026.2
tr|W5A8Y0|W5A8Y0_WHEAT	W5A8Y0	NA	Uncharacterized protein OS=Triticum aestivum PE=3 SV=1	518.49	0	12	tr|W5A8Y0|W5A8Y0_WHEAT	640327	552531	1.04669e+06	1.01002e+06	825172	0.310662	0.0769231	NA	NA	152705	144641	245913	194656
tr|A0A1D5X671|A0A1D5X671_WHEAT	A0A1D5X671	NA	Uncharacterized protein OS=Triticum aestivum PE=4 SV=1	983.33	0	15	tr|A0A1D5X671|A0A1D5X671_WHEAT	734109	718165	503903	914953	726137	0.234352	0.204545	NA	NA	152649	127927	100450	218631
tr|A0A1D5RVE0|A0A1D5RVE0_WHEAT	A0A1D5RVE0	NA	Uncharacterized protein OS=Triticum aestivum PE=4 SV=1	374.7	0	7	tr|A0A1D5RVE0|A0A1D5RVE0_WHEAT	549327	383397	635195	280104	466362	0.346513	0.0625	NA	NA	152519	111117	190422	91779.3
tr|A0A1D5YGZ5|A0A1D5YGZ5_WHEAT	A0A1D5YGZ5	NA	Uncharacterized protein OS=Triticum aestivum PE=4 SV=1	503.28	0	6	tr|A0A1D5YGZ5|A0A1D5YGZ5_WHEAT	540425	829209	113253	114316	327370	0.876863	0.166667	NA	NA	152459	193879	33419.1	34983.3
tr|W5BPV2|W5BPV2_WHEAT	W5BPV2	NA	Uncharacterized protein OS=Triticum aestivum PE=4 SV=1	124.33	0.000659196	1	tr|W5BPV2|W5BPV2_WHEAT	152458	745261	1.12933e+06	1.81285e+06	937296	0.725272	0	NA	NA	152458	745261	1.12933e+06	1.81285e+06
tr|A0A1D5YPH5|A0A1D5YPH5_WHEAT	A0A1D5YPH5	NA	Uncharacterized protein OS=Triticum aestivum PE=4 SV=1	119.48	0.000648929	2	tr|A0A1D5YPH5|A0A1D5YPH5_WHEAT	304429	334498	64313.4	67150.9	185790	0.7633	0	NA	NA	152215	167249	32156.7	33575.5
tr|A0A077RTM5|A0A077RTM5_WHEAT	A0A077RTM5	TRAES_3BF038100020CFD_c1	Uncharacterized protein OS=Triticum aestivum GN=TRAES_3BF038100020CFD_c1 PE=4 SV=1	191.63	0	2	tr|A0A077RTM5|A0A077RTM5_WHEAT	303474	239543	246540	318922	275007	0.144177	0	NA	NA	151737	119772	123270	159461
tr|A0A1D6BLR2|A0A1D6BLR2_WHEAT	A0A1D6BLR2	NA	Uncharacterized protein OS=Triticum aestivum PE=4 SV=1	791.95	0	13	tr|A0A1D6BLR2|A0A1D6BLR2_WHEAT	771406	470622	296308	427906	449264	0.408437	0.233333	NA	NA	150625	85266.6	84095.9	107161
tr|A0A1D6BCK6|A0A1D6BCK6_WHEAT	A0A1D6BCK6	NA	Nuclear/nucleolar GTPase 2 OS=Triticum aestivum PE=3 SV=1	555.66	0	14	tr|A0A1D6BCK6|A0A1D6BCK6_WHEAT	687718	695162	805277	945559	750219	0.154084	0.1	NA	NA	150202	170314	174123	202216
tr|A0A1D5RQA4|A0A1D5RQA4_WHEAT	A0A1D5RQA4	NA	Uncharacterized protein OS=Triticum aestivum PE=4 SV=1	627.08	0	9	tr|A0A1D5RQA4|A0A1D5RQA4_WHEAT	773726	981605	517068	886331	830029	0.254055	0.104167	NA	NA	149925	193446	120811	172421
tr|A0A1D6DBC1|A0A1D6DBC1_WHEAT	A0A1D6DBC1	NA	Uncharacterized protein OS=Triticum aestivum PE=4 SV=1	1173.22	0	21	tr|A0A1D6DBC1|A0A1D6DBC1_WHEAT	1.02524e+06	1.63638e+06	1.39425e+06	2.101e+06	1.51532e+06	0.293012	0.108333	NA	NA	149311	203556	230260	331377
tr|A0A1D5YIV6|A0A1D5YIV6_WHEAT	A0A1D5YIV6	NA	Uncharacterized protein OS=Triticum aestivum PE=4 SV=1	528.77	0	10	tr|A0A1D5YIV6|A0A1D5YIV6_WHEAT	848187	676593	742551	837856	790203	0.105276	0.0384615	NA	NA	149110	115682	134525	153041
tr|A0A1D6S369|A0A1D6S369_WHEAT	A0A1D6S369	NA	Uncharacterized protein OS=Triticum aestivum PE=3 SV=1	515.78	0	13	tr|A0A1D6S369|A0A1D6S369_WHEAT	546696	1.74997e+06	6.42368e+06	5.20483e+06	3.4774e+06	0.799454	0.0892857	NA	NA	148878	430599	1.78608e+06	1.45986e+06
tr|A0A1D5UMA7|A0A1D5UMA7_WHEAT	A0A1D5UMA7	NA	Uncharacterized protein OS=Triticum aestivum PE=4 SV=1	294.33	0	5	tr|A0A1D5UMA7|A0A1D5UMA7_WHEAT	447583	448577	810964	870066	629770	0.353647	0.125	NA	NA	148818	149410	263208	282487
tr|A0A1D5UXN7|A0A1D5UXN7_WHEAT	A0A1D5UXN7	NA	Amine oxidase OS=Triticum aestivum PE=3 SV=1	97.89	0.00177936	3	tr|A0A1D5UXN7|A0A1D5UXN7_WHEAT	446359	392052	504472	706574	475416	0.26811	0	NA	NA	148786	130684	168157	235525
tr|A0A1D5ZRI4|A0A1D5ZRI4_WHEAT	A0A1D5ZRI4	NA	Uncharacterized protein OS=Triticum aestivum PE=4 SV=1	378.2	0	10	tr|A0A1D5ZRI4|A0A1D5ZRI4_WHEAT	684288	283548	898935	772372	728330	0.402929	0.0909091	NA	NA	148770	79394	180021	165201
tr|A0A1D5ZGW3|A0A1D5ZGW3_WHEAT	A0A1D5ZGW3	NA	Uncharacterized protein OS=Triticum aestivum PE=4 SV=1	171.27	0	5	tr|A0A1D5ZGW3|A0A1D5ZGW3_WHEAT	493894	640889	537740	559275	548508	0.110445	0.142857	NA	NA	148766	186344	158453	161079
tr|A0A1D6RZJ4|A0A1D6RZJ4_WHEAT	A0A1D6RZJ4	NA	Uncharacterized protein OS=Triticum aestivum PE=4 SV=1	829.75	0	15	tr|A0A1D6RZJ4|A0A1D6RZJ4_WHEAT	867075	1.06267e+06	862054	883723	875399	0.104809	0.0588235	NA	NA	148569	234846	138878	161712
tr|A0A1D5YG26|A0A1D5YG26_WHEAT	A0A1D5YG26	NA	Uncharacterized protein OS=Triticum aestivum PE=3 SV=1	357.58	0	4	tr|A0A1D5YG26|A0A1D5YG26_WHEAT	444964	418853	299071	445022	431908	0.173399	0	NA	NA	148133	139451	98620.7	147436
tr|A0A1D5YBP6|A0A1D5YBP6_WHEAT	A0A1D5YBP6	NA	Uncharacterized protein OS=Triticum aestivum PE=4 SV=1	555.73	0	6	tr|A0A1D5YBP6|A0A1D5YBP6_WHEAT	578157	226261	284112	234151	259131	0.504937	0.166667	NA	NA	147658	58343	73839.2	67577.1
tr|W5BKZ9|W5BKZ9_WHEAT	W5BKZ9	NA	60S ribosome subunit biogenesis protein NIP7 homolog OS=Triticum aestivum PE=3 SV=1	244.05	0	6	tr|W5BKZ9|W5BKZ9_WHEAT	628640	137750	668471	868333	648556	0.538889	0.0625	NA	NA	146739	41237.9	148215	248752
tr|A0A1D5YI27|A0A1D5YI27_WHEAT	A0A1D5YI27	NA	Uncharacterized protein OS=Triticum aestivum PE=4 SV=1	651.08	0	13	tr|A0A1D5YI27|A0A1D5YI27_WHEAT	813402	890198	498550	604488	708945	0.258545	0.115385	NA	NA	146652	158457	132404	145513
tr|A0A1D5WEJ8|A0A1D5WEJ8_WHEAT	A0A1D5WEJ8	NA	Uncharacterized protein OS=Triticum aestivum PE=4 SV=1	88.16	0.00225989	3	tr|A0A1D5WEJ8|A0A1D5WEJ8_WHEAT	439391	464635	432151	543172	452013	0.108195	0	NA	NA	146464	154878	144050	181057
tr|W5DVY1|W5DVY1_WHEAT	W5DVY1	NA	Uncharacterized protein OS=Triticum aestivum PE=4 SV=1	61.02	0.00769971	1	tr|W5DVY1|W5DVY1_WHEAT	146336	193499	23942.2	24881.3	85608.9	0.887019	0	NA	NA	146336	193499	23942.2	24881.3
tr|A0A1D6C010|A0A1D6C010_WHEAT	A0A1D6C010	NA	Uncharacterized protein OS=Triticum aestivum PE=3 SV=1	328.18	0	8	tr|A0A1D6C010|A0A1D6C010_WHEAT	614268	744144	738814	897738	741479	0.154994	0	NA	NA	146117	182880	174345	217686
sp|Q95H55|RR18_WHEAT	Q95H55	rps18	30S ribosomal protein S18, chloroplastic OS=Triticum aestivum GN=rps18 PE=3 SV=1	488.91	0	7	sp|Q95H55|RR18_WHEAT	684266	727078	222146	150824	453206	0.676272	0.270833	NA	NA	145977	129437	64075.2	38032.2
tr|A0A1D5XQ85|A0A1D5XQ85_WHEAT	A0A1D5XQ85	NA	Alanine--tRNA ligase OS=Triticum aestivum PE=3 SV=1	181.3	0	3	tr|A0A1D5XQ85|A0A1D5XQ85_WHEAT	436250	64469.5	319636	434203	376919	0.557405	0	NA	NA	145417	21489.8	106545	144734
tr|A0A1D6C9J9|A0A1D6C9J9_WHEAT	A0A1D6C9J9	NA	Uncharacterized protein OS=Triticum aestivum PE=4 SV=1	661.54	0	10	tr|A0A1D6C9J9|A0A1D6C9J9_WHEAT	584113	499240	728416	767419	656264	0.193906	0.0535714	NA	NA	144862	125113	195452	189822
tr|A0A1D5RZV1|A0A1D5RZV1_WHEAT	A0A1D5RZV1	NA	Uncharacterized protein OS=Triticum aestivum PE=3 SV=1	830.6	0	16	tr|A0A1D5RZV1|A0A1D5RZV1_WHEAT	912668	1.28101e+06	583447	739505	826087	0.340956	0.0833333	NA	NA	144426	248373	94956.6	127801
tr|A0A1D5X0K1|A0A1D5X0K1_WHEAT	A0A1D5X0K1	NA	Uncharacterized protein OS=Triticum aestivum PE=4 SV=1	138.05	0	2	tr|A0A1D5X0K1|A0A1D5X0K1_WHEAT	432756	412801	884646	523688	478222	0.389526	0.0625	NA	NA	144252	137600	294882	174563
tr|A0A1D5ZZZ5|A0A1D5ZZZ5_WHEAT	A0A1D5ZZZ5	NA	Uncharacterized protein OS=Triticum aestivum PE=3 SV=1	789.05	0	14	tr|A0A1D5ZZZ5|A0A1D5ZZZ5_WHEAT	907539	1.16344e+06	781246	1.03061e+06	969076	0.168879	0.109375	NA	NA	144135	188547	153419	176460
tr|A0A1D6BUT5|A0A1D6BUT5_WHEAT	A0A1D6BUT5	NA	Uncharacterized protein OS=Triticum aestivum PE=4 SV=1	914.72	0	5	tr|A0A1D6BUT5|A0A1D6BUT5_WHEAT	460899	316363	1.02565e+06	1.36048e+06	743273	0.616705	0.173077	NA	NA	143899	96825.9	290316	425090
tr|A0A1D6AYG0|A0A1D6AYG0_WHEAT	A0A1D6AYG0	NA	Uncharacterized protein OS=Triticum aestivum PE=4 SV=1	575.21	0	13	tr|A0A1D6AYG0|A0A1D6AYG0_WHEAT	560046	570147	1.04356e+06	959527	764837	0.324695	0.0535714	NA	NA	143641	129425	292352	251028
tr|A0A1D6C642|A0A1D6C642_WHEAT	A0A1D6C642	NA	Histone H2A OS=Triticum aestivum PE=3 SV=1	170.98	0	3	tr|A0A1D6C642|A0A1D6C642_WHEAT	430764	369282	330805	434405	400023	0.128283	0.05	NA	NA	143588	123094	110268	144802
tr|A0A1D5T6F6|A0A1D5T6F6_WHEAT	A0A1D5T6F6	NA	Uncharacterized protein OS=Triticum aestivum PE=3 SV=1	537.34	0	7	tr|A0A1D5T6F6|A0A1D5T6F6_WHEAT	653562	513382	775750	777441	714656	0.184301	0.136364	NA	NA	143492	102885	204137	194492
sp|G5CEW6|IF4G_WHEAT	G5CEW6	NA	Eukaryotic translation initiation factor 4G OS=Triticum aestivum PE=1 SV=1	236.8	0	6	sp|G5CEW6|IF4G_WHEAT	472332	383622	326848	255470	355235	0.2549	0.178571	NA	NA	143160	121354	95238.8	84315.3
tr|A0A1D5SD54|A0A1D5SD54_WHEAT	A0A1D5SD54	NA	Uncharacterized protein OS=Triticum aestivum PE=4 SV=1	357.52	0	7	tr|A0A1D5SD54|A0A1D5SD54_WHEAT	505519	850350	50893.7	83481.7	294500	1.01973	0.1875	NA	NA	142782	250115	15499.3	26838.9
tr|A0A1D5VZC0|A0A1D5VZC0_WHEAT	A0A1D5VZC0	NA	Glutamate decarboxylase OS=Triticum aestivum PE=3 SV=1	75.32	0.00367261	1	tr|A0A1D5VZC0|A0A1D5VZC0_WHEAT	142613	107720	102210	84779.2	104965	0.22178	0	NA	NA	142613	107720	102210	84779.2
tr|W5E1T5|W5E1T5_WHEAT	W5E1T5	NA	ATP-dependent Clp protease proteolytic subunit OS=Triticum aestivum PE=3 SV=1	181.15	0	2	tr|W5E1T5|W5E1T5_WHEAT	433359	501337	411197	734949	467348	0.284898	0.1	NA	NA	142509	166426	120777	244978
tr|W5GES9|W5GES9_WHEAT	W5GES9	NA	Histone H2B OS=Triticum aestivum PE=3 SV=1	86.72	0.00224341	1	tr|W5GES9|W5GES9_WHEAT	141558	232800	116560	37927.4	129059	0.607291	0.333333	NA	NA	141558	232800	116560	37927.4
tr|A0A1D5XH52|A0A1D5XH52_WHEAT	A0A1D5XH52	NA	Uncharacterized protein OS=Triticum aestivum PE=3 SV=1	243.54	0	4	tr|A0A1D5XH52|A0A1D5XH52_WHEAT	469100	435362	151602	172525	303943	0.547981	0	NA	NA	141462	134968	42293.9	54800.2
tr|W5HX33|W5HX33_WHEAT	W5HX33	NA	Uncharacterized protein OS=Triticum aestivum PE=3 SV=1	144.31	0	3	tr|W5HX33|W5HX33_WHEAT	458667	629305	72085.5	192558	325613	0.746729	0	NA	NA	141433	195870	22811.7	63531.8
tr|A0A1D5VIV0|A0A1D5VIV0_WHEAT	A0A1D5VIV0	NA	Uncharacterized protein OS=Triticum aestivum PE=3 SV=1	660.3	0	18	tr|A0A1D5VIV0|A0A1D5VIV0_WHEAT	925443	544901	267358	456306	500604	0.504411	0.184211	NA	NA	141194	90016.1	51611.1	75652.4
tr|A0A1D5X401|A0A1D5X401_WHEAT	A0A1D5X401	NA	Uncharacterized protein OS=Triticum aestivum PE=4 SV=1	830.55	0	14	tr|A0A1D5X401|A0A1D5X401_WHEAT	1.00923e+06	1.18997e+06	1.5179e+06	2.09183e+06	1.35394e+06	0.327457	0.181818	NA	NA	141194	156876	191992	265155
tr|A0A1D5Y461|A0A1D5Y461_WHEAT	A0A1D5Y461	NA	Uncharacterized protein OS=Triticum aestivum PE=4 SV=1	466.87	0	10	tr|A0A1D5Y461|A0A1D5Y461_WHEAT	529154	485361	604527	607881	566840	0.107547	0.136364	NA	NA	141044	101110	166934	141064
tr|A0A1D5V932|A0A1D5V932_WHEAT	A0A1D5V932	NA	Uncharacterized protein OS=Triticum aestivum PE=4 SV=1	1319.99	0	25	tr|A0A1D5V932|A0A1D5V932_WHEAT	977095	836821	1.18529e+06	1.46395e+06	1.08119e+06	0.244405	0.0948276	NA	NA	140758	124861	177205	219904
tr|W4ZLK0|W4ZLK0_WHEAT	W4ZLK0	NA	Uncharacterized protein OS=Triticum aestivum PE=4 SV=1	326.18	0	6	tr|W4ZLK0|W4ZLK0_WHEAT	531562	522978	347794	486321	504650	0.180452	0	NA	NA	140585	144459	97660.9	136555
tr|Q36813|Q36813_WHEAT	Q36813	nad7	NADH dehydrogenase OS=Triticum aestivum GN=nad7 PE=3 SV=1	312.84	0	3	tr|Q36813|Q36813_WHEAT	421731	556811	493927	643054	525369	0.177769	0	NA	NA	140577	185604	164642	214351
tr|A0A1D5UV53|A0A1D5UV53_WHEAT	A0A1D5UV53	NA	Uncharacterized protein OS=Triticum aestivum PE=4 SV=1	601.04	0	11	tr|A0A1D5UV53|A0A1D5UV53_WHEAT	863614	615248	163094	296083	455666	0.652268	0.0833333	NA	NA	140559	129179	40721.6	85230.2
tr|A0A0H4LXI0|A0A0H4LXI0_WHEAT	A0A0H4LXI0	Cat3-A1	Catalase OS=Triticum aestivum GN=Cat3-A1 PE=2 SV=1	631.35	0	10	tr|A0A0H4LXI0|A0A0H4LXI0_WHEAT	674990	792920	549931	924953	733955	0.218168	0.115385	NA	NA	140413	179543	131494	217235
tr|A0A1D5WW15|A0A1D5WW15_WHEAT	A0A1D5WW15	NA	Uncharacterized protein OS=Triticum aestivum PE=4 SV=1	853.23	0	14	tr|A0A1D5WW15|A0A1D5WW15_WHEAT	872954	1.24986e+06	476452	655078	764016	0.409286	0.176471	NA	NA	140311	267596	88878.6	126728
tr|A0A1D6RJ23|A0A1D6RJ23_WHEAT	A0A1D6RJ23	NA	Uncharacterized protein OS=Triticum aestivum PE=4 SV=1	953.81	0	18	tr|A0A1D6RJ23|A0A1D6RJ23_WHEAT	1.00702e+06	811299	1.22128e+06	1.55119e+06	1.11415e+06	0.276072	0.130435	NA	NA	140156	115006	220093	221470
tr|Q94KM0|Q94KM0_WHEAT	Q94KM0	NA	HSP17 OS=Triticum aestivum PE=2 SV=1	87.2	0.00224719	1	tr|Q94KM0|Q94KM0_WHEAT	139253	192130	219062	249255	205596	0.233566	0	NA	NA	139253	192130	219062	249255
tr|A0A1D6AW22|A0A1D6AW22_WHEAT	A0A1D6AW22	NA	Uncharacterized protein OS=Triticum aestivum PE=4 SV=1	442.34	0	4	tr|A0A1D6AW22|A0A1D6AW22_WHEAT	415698	787486	102982	162782	289240	0.847489	0.0416667	NA	NA	138561	240972	33839.5	53849.2
tr|A0A1D5S3T1|A0A1D5S3T1_WHEAT	A0A1D5S3T1	NA	Uncharacterized protein OS=Triticum aestivum PE=4 SV=1	324.81	0	4	tr|A0A1D5S3T1|A0A1D5S3T1_WHEAT	424209	433639	1.05195e+06	828511	631075	0.451371	0.142857	NA	NA	138455	144541	331113	245405
tr|W5G8P8|W5G8P8_WHEAT	W5G8P8	NA	60S ribosomal protein L6 OS=Triticum aestivum PE=3 SV=1	1085.11	0	13	tr|W5G8P8|W5G8P8_WHEAT	764818	2.44893e+06	5.07835e+06	5.39894e+06	3.76364e+06	0.645832	0.142857	NA	NA	137949	552687	1.1051e+06	1.14178e+06
tr|A0A1D5UKT3|A0A1D5UKT3_WHEAT	A0A1D5UKT3	NA	Coatomer subunit epsilon OS=Triticum aestivum PE=3 SV=1	373.33	0	5	tr|A0A1D5UKT3|A0A1D5UKT3_WHEAT	455349	589968	556331	496283	526307	0.114807	0	NA	NA	137832	157791	141240	129235
tr|A0A1D5SHX9|A0A1D5SHX9_WHEAT	A0A1D5SHX9	NA	Uncharacterized protein OS=Triticum aestivum PE=3 SV=1	479.29	0	8	tr|A0A1D5SHX9|A0A1D5SHX9_WHEAT	489170	1.40416e+06	692130	1.49012e+06	1.04815e+06	0.493294	0.0909091	NA	NA	137585	401265	145584	351819
tr|A0A1D5VZI9|A0A1D5VZI9_WHEAT	A0A1D5VZI9	NA	Uncharacterized protein OS=Triticum aestivum PE=4 SV=1	945.79	0	24	tr|A0A1D5VZI9|A0A1D5VZI9_WHEAT	1.03558e+06	874731	796136	1.05892e+06	955157	0.134692	0.201923	NA	NA	136880	107972	91888.5	198570
tr|A0A1D6RLZ2|A0A1D6RLZ2_WHEAT	A0A1D6RLZ2	NA	Uncharacterized protein OS=Triticum aestivum PE=4 SV=1	179.48	0	4	tr|A0A1D6RLZ2|A0A1D6RLZ2_WHEAT	416517	428408	196571	363014	389765	0.304422	0	NA	NA	135781	139497	63357	117867
tr|A0A1D5YNH1|A0A1D5YNH1_WHEAT	A0A1D5YNH1	NA	Signal recognition particle subunit SRP68 OS=Triticum aestivum PE=3 SV=1	537.05	0	10	tr|A0A1D5YNH1|A0A1D5YNH1_WHEAT	706595	481836	294979	328151	404994	0.414461	0.104167	NA	NA	135644	97005.1	72028.1	86279.4
tr|A0A1D5SH12|A0A1D5SH12_WHEAT	A0A1D5SH12	NA	Uncharacterized protein OS=Triticum aestivum PE=4 SV=1	659.01	0	14	tr|A0A1D5SH12|A0A1D5SH12_WHEAT	779426	777690	837680	1.08238e+06	808553	0.166533	0.0694444	NA	NA	135576	148449	147331	208257
tr|A0A1D5SZX4|A0A1D5SZX4_WHEAT	A0A1D5SZX4	NA	Uncharacterized protein OS=Triticum aestivum PE=4 SV=1	87.26	0.00224845	2	tr|A0A1D5SZX4|A0A1D5SZX4_WHEAT	271098	227740	396210	507454	333654	0.361128	0.0625	NA	NA	135549	113870	198105	253727
tr|A0A1D5S8D7|A0A1D5S8D7_WHEAT	A0A1D5S8D7	NA	Uncharacterized protein OS=Triticum aestivum PE=4 SV=1	530.82	0	11	tr|A0A1D5S8D7|A0A1D5S8D7_WHEAT	582750	511030	309847	450734	480882	0.24986	0.134615	NA	NA	135165	110847	57708.1	97880.4
tr|W5GUD8|W5GUD8_WHEAT	W5GUD8	NA	Uncharacterized protein OS=Triticum aestivum PE=4 SV=1	316.8	0	7	tr|W5GUD8|W5GUD8_WHEAT	530608	369542	640796	626302	578455	0.230373	0.142857	NA	NA	134426	108236	142749	158036
tr|A0A1D5ZKM9|A0A1D5ZKM9_WHEAT	A0A1D5ZKM9	NA	Uncharacterized protein OS=Triticum aestivum PE=4 SV=1	238.25	0	3	tr|A0A1D5ZKM9|A0A1D5ZKM9_WHEAT	401639	169439	1.42253e+06	699261	550450	0.808916	0.142857	NA	NA	133880	56479.8	474175	233087
tr|A0A1D5RYT7|A0A1D5RYT7_WHEAT	A0A1D5RYT7	NA	Uncharacterized protein OS=Triticum aestivum PE=4 SV=1	882.34	0	17	tr|A0A1D5RYT7|A0A1D5RYT7_WHEAT	615530	1.19289e+06	632604	935109	783856	0.325842	0.178571	NA	NA	133670	233176	100714	204323
tr|A0A1D6BVV8|A0A1D6BVV8_WHEAT	A0A1D6BVV8	NA	Polyadenylate-binding protein OS=Triticum aestivum PE=3 SV=1	132.9	0	3	tr|A0A1D6BVV8|A0A1D6BVV8_WHEAT	400077	131061	56345.8	109552	120306	0.882515	0	NA	NA	133359	43687	18781.9	36517.2
tr|A0A1D5YT33|A0A1D5YT33_WHEAT	A0A1D5YT33	NA	Uncharacterized protein OS=Triticum aestivum PE=4 SV=1	335.85	0	6	tr|A0A1D5YT33|A0A1D5YT33_WHEAT	496308	502717	228602	290867	393588	0.370826	0.0714286	NA	NA	133102	129444	67508.8	76129.1
tr|A0A1D5YBP3|A0A1D5YBP3_WHEAT	A0A1D5YBP3	NA	Uncharacterized protein OS=Triticum aestivum PE=4 SV=1	460.44	0	6	tr|A0A1D5YBP3|A0A1D5YBP3_WHEAT	408698	644028	343897	386952	397825	0.302329	0.142857	NA	NA	133068	197276	112078	128618
tr|A0A1D6RH99|A0A1D6RH99_WHEAT	A0A1D6RH99	NA	Uncharacterized protein OS=Triticum aestivum PE=4 SV=1	524.99	0	5	tr|A0A1D6RH99|A0A1D6RH99_WHEAT	482486	1.03284e+06	1.15432e+06	768806	900824	0.347264	0.0833333	NA	NA	132296	278594	360876	190065
tr|A0A1D5SBJ1|A0A1D5SBJ1_WHEAT	A0A1D5SBJ1	NA	Signal recognition particle 54 kDa protein OS=Triticum aestivum PE=3 SV=1	74.45	0.00418629	1	tr|A0A1D5SBJ1|A0A1D5SBJ1_WHEAT	132127	151018	78625.8	4008.43	105377	0.720239	0.25	NA	NA	132127	151018	78625.8	4008.43
tr|A0A1D5ZJB0|A0A1D5ZJB0_WHEAT	A0A1D5ZJB0	NA	Uncharacterized protein OS=Triticum aestivum PE=4 SV=1	578.99	0	10	tr|A0A1D5ZJB0|A0A1D5ZJB0_WHEAT	625533	611072	705297	878751	665415	0.174312	0.0892857	NA	NA	131703	138663	149366	193349
tr|A0A1D6BY19|A0A1D6BY19_WHEAT	A0A1D6BY19	NA	Pyruvate dehydrogenase E1 component subunit alpha OS=Triticum aestivum PE=4 SV=1	254.88	0	7	tr|A0A1D6BY19|A0A1D6BY19_WHEAT	443143	443683	513482	466260	454971	0.0707878	0.178571	NA	NA	131539	138240	151091	147629
tr|A0A1D5VW25|A0A1D5VW25_WHEAT	A0A1D5VW25	NA	Uncharacterized protein OS=Triticum aestivum PE=4 SV=1	429.86	0	8	tr|A0A1D5VW25|A0A1D5VW25_WHEAT	625687	621468	705863	886797	665775	0.174835	0.15	NA	NA	131517	150212	161509	204387
tr|A0A1D5V0W9|A0A1D5V0W9_WHEAT	A0A1D5V0W9	NA	Uncharacterized protein OS=Triticum aestivum PE=4 SV=1	427.93	0	6	tr|A0A1D5V0W9|A0A1D5V0W9_WHEAT	430049	362353	3.23386e+06	1.2058e+06	817922	1.02423	0.0714286	NA	NA	131269	119756	906703	340441
tr|A0A1D6SDR0|A0A1D6SDR0_WHEAT	A0A1D6SDR0	NA	Uncharacterized protein OS=Triticum aestivum PE=4 SV=1	467.23	0	4	tr|A0A1D6SDR0|A0A1D6SDR0_WHEAT	391879	460255	189541	99482.5	290710	0.592323	0.178571	NA	NA	130620	153413	63175.2	32075.9
tr|A0A1D5XV09|A0A1D5XV09_WHEAT	A0A1D5XV09	NA	Pyruvate kinase OS=Triticum aestivum PE=3 SV=1	890.8	0	16	tr|A0A1D5XV09|A0A1D5XV09_WHEAT	682887	718640	687963	877202	703302	0.12367	0.15	NA	NA	130449	140014	160017	168750
tr|A0A1D6AG26|A0A1D6AG26_WHEAT	A0A1D6AG26	NA	Uncharacterized protein OS=Triticum aestivum PE=4 SV=1	289.8	0	4	tr|A0A1D6AG26|A0A1D6AG26_WHEAT	396101	320479	201307	225604	273042	0.313732	0.0833333	NA	NA	130309	105340	60306	74420.4
tr|A0A1D6DGJ6|A0A1D6DGJ6_WHEAT	A0A1D6DGJ6	NA	Uncharacterized protein OS=Triticum aestivum PE=3 SV=1	125.38	0	2	tr|A0A1D6DGJ6|A0A1D6DGJ6_WHEAT	260391	249818	96133.3	137394	193606	0.43963	0	NA	NA	130196	124909	48066.6	68697
tr|A0A1D5S072|A0A1D5S072_WHEAT	A0A1D5S072	NA	Uncharacterized protein OS=Triticum aestivum PE=4 SV=1	127.81	0	2	tr|A0A1D5S072|A0A1D5S072_WHEAT	260090	233776	436460	241466	250778	0.328763	0	NA	NA	130045	116888	218230	120733
tr|A0A1D5VXF9|A0A1D5VXF9_WHEAT	A0A1D5VXF9	NA	Uncharacterized protein OS=Triticum aestivum PE=3 SV=1	693.68	0	12	tr|A0A1D5VXF9|A0A1D5VXF9_WHEAT	678101	482700	222196	152521	352448	0.63096	0.296875	NA	NA	130002	86188.4	66431.9	35569.7
tr|A0A1D6CKL2|A0A1D6CKL2_WHEAT	A0A1D6CKL2	NA	T-complex protein 1 subunit gamma OS=Triticum aestivum PE=3 SV=1	478.71	0	11	tr|A0A1D6CKL2|A0A1D6CKL2_WHEAT	583871	621245	421542	481585	532728	0.174238	0.0961538	NA	NA	129962	135410	97553.2	94114.8
tr|A0A1D6ABM4|A0A1D6ABM4_WHEAT	A0A1D6ABM4	NA	Uncharacterized protein OS=Triticum aestivum PE=3 SV=1	222.64	0	4	tr|A0A1D6ABM4|A0A1D6ABM4_WHEAT	402703	725166	229174	476880	439791	0.449034	0.05	NA	NA	129959	239461	76386.4	152053
tr|A0A1D6AI88|A0A1D6AI88_WHEAT	A0A1D6AI88	NA	Uncharacterized protein OS=Triticum aestivum PE=4 SV=1	1008.93	0	13	tr|A0A1D6AI88|A0A1D6AI88_WHEAT	686218	1.16732e+06	502768	583236	634727	0.405375	0.132353	NA	NA	129492	210276	113310	133884
tr|W5AUV0|W5AUV0_WHEAT	W5AUV0	NA	Uncharacterized protein OS=Triticum aestivum PE=3 SV=1	1176.34	0	26	tr|W5AUV0|W5AUV0_WHEAT	1.2829e+06	968278	969449	1.22344e+06	1.09644e+06	0.149349	0.112903	NA	NA	129452	121175	154257	187492
tr|A0A1D5U7M3|A0A1D5U7M3_WHEAT	A0A1D5U7M3	NA	Uncharacterized protein OS=Triticum aestivum PE=4 SV=1	349.59	0	8	tr|A0A1D5U7M3|A0A1D5U7M3_WHEAT	561838	394003	524133	615434	542986	0.180059	0.025	NA	NA	129238	107762	88589.8	123187
tr|A0A1D5UGE8|A0A1D5UGE8_WHEAT	A0A1D5UGE8	NA	Uncharacterized protein OS=Triticum aestivum PE=3 SV=1	191.41	0	5	tr|A0A1D5UGE8|A0A1D5UGE8_WHEAT	388034	352353	470324	672985	429179	0.304675	0.15	NA	NA	129206	102627	129654	191784
sp|Q95H49|RR3_WHEAT	Q95H49	rps3	30S ribosomal protein S3, chloroplastic OS=Triticum aestivum GN=rps3 PE=3 SV=1	313.24	0	4	sp|Q95H49|RR3_WHEAT	415570	450617	744192	567268	508942	0.272102	0.05	NA	NA	129075	150200	244206	181068
tr|A0A1D6RI06|A0A1D6RI06_WHEAT	A0A1D6RI06	NA	Uncharacterized protein OS=Triticum aestivum PE=4 SV=1	233.68	0	5	tr|A0A1D6RI06|A0A1D6RI06_WHEAT	438340	87764.4	34310.9	30762.3	61037.6	1.32241	0.3	NA	NA	129040	29244.5	11426.7	10243.8
tr|A0A1D5S9P8|A0A1D5S9P8_WHEAT	A0A1D5S9P8	NA	Uncharacterized protein OS=Triticum aestivum PE=4 SV=1	678.61	0	13	tr|A0A1D5S9P8|A0A1D5S9P8_WHEAT	689057	686930	219090	203239	453010	0.612517	0.116667	NA	NA	128732	119784	44555.9	40809.7
tr|A0A1D5UAI6|A0A1D5UAI6_WHEAT	A0A1D5UAI6	NA	Uncharacterized protein OS=Triticum aestivum PE=4 SV=1	266.5	0	5	tr|A0A1D5UAI6|A0A1D5UAI6_WHEAT	416353	230415	64117.2	105527	167971	0.774965	0.166667	NA	NA	128575	76566.7	21296.9	35165.2
tr|A0A1D5WMM0|A0A1D5WMM0_WHEAT	A0A1D5WMM0	NA	Uncharacterized protein OS=Triticum aestivum PE=4 SV=1	561.82	0	10	tr|A0A1D5WMM0|A0A1D5WMM0_WHEAT	475823	477444	2.18622e+06	2.33309e+06	1.33183e+06	0.753703	0.0833333	NA	NA	127567	156958	514185	557657
tr|A0A1D5WPC4|A0A1D5WPC4_WHEAT	A0A1D5WPC4	NA	Uncharacterized protein OS=Triticum aestivum PE=4 SV=1	446.18	0	8	tr|A0A1D5WPC4|A0A1D5WPC4_WHEAT	516238	596357	133023	221888	369063	0.610867	0.111111	NA	NA	127489	143220	35716.7	64997.3
tr|A0A1D6DB06|A0A1D6DB06_WHEAT	A0A1D6DB06	NA	Uncharacterized protein OS=Triticum aestivum PE=4 SV=1	641.17	0	13	tr|A0A1D6DB06|A0A1D6DB06_WHEAT	554799	392182	531565	812251	543182	0.305752	0.0666667	NA	NA	127268	99006.5	105469	196496
tr|A0A1D6DM92|A0A1D6DM92_WHEAT	A0A1D6DM92	NA	Uncharacterized protein OS=Triticum aestivum PE=4 SV=1	381.42	0	6	tr|A0A1D6DM92|A0A1D6DM92_WHEAT	472801	238222	376038	263560	319799	0.320412	0.375	NA	NA	126702	73375.5	125326	85506.2
tr|A0A1D6S8B4|A0A1D6S8B4_WHEAT	A0A1D6S8B4	NA	Uncharacterized protein OS=Triticum aestivum PE=4 SV=1	812.72	0	20	tr|A0A1D6S8B4|A0A1D6S8B4_WHEAT	771425	786145	441825	521825	646625	0.277066	0.159091	NA	NA	126656	121088	96228.7	111336
tr|W5EKE6|W5EKE6_WHEAT	W5EKE6	NA	Uncharacterized protein OS=Triticum aestivum PE=4 SV=1	629.71	0	9	tr|W5EKE6|W5EKE6_WHEAT	610032	632165	641167	1.09347e+06	636666	0.313361	0.107143	NA	NA	126608	136762	127995	316490
tr|A0A1D5XQR7|A0A1D5XQR7_WHEAT	A0A1D5XQR7	NA	Uncharacterized protein OS=Triticum aestivum PE=4 SV=1	132.88	0	2	tr|A0A1D5XQR7|A0A1D5XQR7_WHEAT	252970	280357	189217	125573	221093	0.326076	0	NA	NA	126485	140179	94608.3	62786.3
tr|A0A1D5SRH1|A0A1D5SRH1_WHEAT	A0A1D5SRH1	NA	Uncharacterized protein OS=Triticum aestivum PE=4 SV=1	193.02	0	2	tr|A0A1D5SRH1|A0A1D5SRH1_WHEAT	251948	346630	139791	379327	299289	0.385168	0	NA	NA	125974	173315	69895.7	189664
tr|A0A1D5V9U5|A0A1D5V9U5_WHEAT	A0A1D5V9U5	NA	Uncharacterized protein OS=Triticum aestivum PE=4 SV=1	762.45	0	14	tr|A0A1D5V9U5|A0A1D5V9U5_WHEAT	810684	369186	423970	304472	396578	0.477289	0.191176	NA	NA	125814	75976.3	91038.4	79671.5
tr|A0A1D5W7B3|A0A1D5W7B3_WHEAT	A0A1D5W7B3	NA	Uncharacterized protein OS=Triticum aestivum PE=4 SV=1	258.22	0	4	tr|A0A1D5W7B3|A0A1D5W7B3_WHEAT	378623	282024	168876	198845	240434	0.366029	0	NA	NA	125385	82665.8	56032	66050.7
tr|W5BDM2|W5BDM2_WHEAT	W5BDM2	NA	Uncharacterized protein OS=Triticum aestivum PE=3 SV=1	444.94	0	6	tr|W5BDM2|W5BDM2_WHEAT	513687	987908	223709	549312	531499	0.554388	0.3	NA	NA	124971	277761	64554.9	164899
tr|A0A1D5RTT2|A0A1D5RTT2_WHEAT	A0A1D5RTT2	NA	Uncharacterized protein OS=Triticum aestivum PE=4 SV=1	269.42	0	4	tr|A0A1D5RTT2|A0A1D5RTT2_WHEAT	375738	66237.4	1.05948e+06	1.36889e+06	717609	0.83699	0.125	NA	NA	124616	22074	345331	420643
tr|A0A1D5V5A6|A0A1D5V5A6_WHEAT	A0A1D5V5A6	NA	Uncharacterized protein OS=Triticum aestivum PE=4 SV=1	345.34	0	7	tr|A0A1D5V5A6|A0A1D5V5A6_WHEAT	478449	229740	414505	465479	439992	0.289387	0.21875	NA	NA	124150	73945.9	132677	136077
tr|A0A1D5VL71|A0A1D5VL71_WHEAT	A0A1D5VL71	NA	Uncharacterized protein OS=Triticum aestivum PE=4 SV=1	309.17	0	7	tr|A0A1D5VL71|A0A1D5VL71_WHEAT	446682	597028	455764	819774	526396	0.300365	0.0833333	NA	NA	123828	180387	108814	198862
tr|A0A1D6CBM9|A0A1D6CBM9_WHEAT	A0A1D6CBM9	NA	60S ribosomal protein L13 OS=Triticum aestivum PE=3 SV=1	496.98	0	6	tr|A0A1D6CBM9|A0A1D6CBM9_WHEAT	433005	2.69107e+06	969929	1.47956e+06	1.22474e+06	0.692478	0.0454545	NA	NA	123608	783283	241981	463401
tr|A0A1D6AEM7|A0A1D6AEM7_WHEAT	A0A1D6AEM7	NA	Uncharacterized protein OS=Triticum aestivum PE=4 SV=1	553.24	0	10	tr|A0A1D6AEM7|A0A1D6AEM7_WHEAT	467726	844592	655815	1.0222e+06	750204	0.319887	0.113636	NA	NA	123570	174530	166912	276040
tr|A0A1D5W1I9|A0A1D5W1I9_WHEAT	A0A1D5W1I9	NA	Uncharacterized protein OS=Triticum aestivum PE=3 SV=1	101.38	0	2	tr|A0A1D5W1I9|A0A1D5W1I9_WHEAT	370311	318221	140078	1.02983e+06	344266	0.838325	0	NA	NA	123437	106074	46692.8	343277
tr|A0A1D5SZG4|A0A1D5SZG4_WHEAT	A0A1D5SZG4	PFK	ATP-dependent 6-phosphofructokinase OS=Triticum aestivum GN=PFK PE=3 SV=1	61.47	0.00772574	1	tr|A0A1D5SZG4|A0A1D5SZG4_WHEAT	122887	98230.8	23664.5	36943.3	67587	0.677607	0	NA	NA	122887	98230.8	23664.5	36943.3
tr|A0A1D5RYR7|A0A1D5RYR7_WHEAT	A0A1D5RYR7	NA	Uncharacterized protein OS=Triticum aestivum PE=4 SV=1	287.5	0	6	tr|A0A1D5RYR7|A0A1D5RYR7_WHEAT	451579	168643	408414	353184	380799	0.360578	0.0357143	NA	NA	122533	54671.6	114095	102110
tr|A0A1D5WDA8|A0A1D5WDA8_WHEAT	A0A1D5WDA8	NA	Peroxidase OS=Triticum aestivum PE=3 SV=1	366.35	0	8	tr|A0A1D5WDA8|A0A1D5WDA8_WHEAT	644249	467172	670530	743451	657390	0.185667	0.075	NA	NA	121149	126649	121860	150642
tr|A0A1D6SET6|A0A1D6SET6_WHEAT	A0A1D6SET6	NA	Uncharacterized protein OS=Triticum aestivum PE=4 SV=1	355.05	0	5	tr|A0A1D6SET6|A0A1D6SET6_WHEAT	430181	321712	680278	461381	445781	0.317615	0.25	NA	NA	120842	107222	215461	153783
tr|A0A1D6D5N0|A0A1D6D5N0_WHEAT	A0A1D6D5N0	NA	Uncharacterized protein OS=Triticum aestivum PE=4 SV=1	639.32	0	10	tr|A0A1D6D5N0|A0A1D6D5N0_WHEAT	608821	626741	508092	478218	558456	0.132041	0.125	NA	NA	120687	125401	110268	103889
tr|A0A1D5SPP6|A0A1D5SPP6_WHEAT	A0A1D5SPP6	NA	Structural maintenance of chromosomes protein OS=Triticum aestivum PE=3 SV=1	172.58	0	5	tr|A0A1D5SPP6|A0A1D5SPP6_WHEAT	419456	385301	545484	312740	402379	0.233959	0	NA	NA	120529	105864	150254	76948.5
tr|A0A1D5YPI7|A0A1D5YPI7_WHEAT	A0A1D5YPI7	NA	Uncharacterized protein OS=Triticum aestivum PE=4 SV=1	306.45	0	5	tr|A0A1D5YPI7|A0A1D5YPI7_WHEAT	383717	281681	521344	560704	452531	0.293677	0.125	NA	NA	120403	93883.4	171310	178148
tr|W5EQ69|W5EQ69_WHEAT	W5EQ69	NA	UDP-glucose 6-dehydrogenase OS=Triticum aestivum PE=3 SV=1	188.28	0	2	tr|W5EQ69|W5EQ69_WHEAT	240387	129030	233392	361036	236890	0.393738	0.416667	NA	NA	120194	64515.1	116696	180518
tr|A0A1D5YI79|A0A1D5YI79_WHEAT	A0A1D5YI79	NA	Uncharacterized protein OS=Triticum aestivum PE=4 SV=1	287.45	0	6	tr|A0A1D5YI79|A0A1D5YI79_WHEAT	470971	480211	304360	301707	387665	0.256101	0.15625	NA	NA	120047	113348	101117	100133
tr|A0A1D5X690|A0A1D5X690_WHEAT	A0A1D5X690	NA	Uncharacterized protein OS=Triticum aestivum PE=4 SV=1	404.56	0	8	tr|A0A1D5X690|A0A1D5X690_WHEAT	437359	433781	965425	477046	457203	0.447368	0.125	NA	NA	119996	93402.7	301299	137033
tr|W5AP46|W5AP46_WHEAT	W5AP46	NA	Uncharacterized protein OS=Triticum aestivum PE=1 SV=1	341.52	0	5	tr|W5AP46|W5AP46_WHEAT	369240	2.302e+06	930599	838035	884317	0.749402	0.0714286	NA	NA	119878	735629	281215	260893
tr|A0A1D5X4C7|A0A1D5X4C7_WHEAT	A0A1D5X4C7	NA	Uncharacterized protein OS=Triticum aestivum PE=4 SV=1	764.08	0	11	tr|A0A1D5X4C7|A0A1D5X4C7_WHEAT	606590	580386	528663	602298	591342	0.0617301	0.104167	NA	NA	119796	96842.4	96969.2	139255
tr|A0A077RWL8|A0A077RWL8_WHEAT	A0A077RWL8	TRAES_3BF059300020CFD_c1	Uncharacterized protein OS=Triticum aestivum GN=TRAES_3BF059300020CFD_c1 PE=3 SV=1	71.69	0.00567303	1	tr|A0A077RWL8|A0A077RWL8_WHEAT	119722	148027	1.29751e+06	354980	251503	1.15603	0	NA	NA	119722	148027	1.29751e+06	354980
tr|A0A1D5S2L2|A0A1D5S2L2_WHEAT	A0A1D5S2L2	NA	Uncharacterized protein OS=Triticum aestivum PE=4 SV=1	443.44	0	6	tr|A0A1D5S2L2|A0A1D5S2L2_WHEAT	502302	470440	465344	481955	476198	0.0341765	0	NA	NA	119004	122229	134006	144975
tr|A0A1D5ZIG1|A0A1D5ZIG1_WHEAT	A0A1D5ZIG1	NA	Uncharacterized protein OS=Triticum aestivum PE=4 SV=1	92.79	0.0017331	2	tr|A0A1D5ZIG1|A0A1D5ZIG1_WHEAT	237426	53393	68311.9	60559.6	64435.8	0.84391	0.125	NA	NA	118713	26696.5	34156	30279.8
tr|A0A1D5SML5|A0A1D5SML5_WHEAT	A0A1D5SML5	NA	Uncharacterized protein OS=Triticum aestivum PE=4 SV=1	125.18	0	2	tr|A0A1D5SML5|A0A1D5SML5_WHEAT	237231	199905	37480.9	56598	128251	0.756764	0	NA	NA	118616	99952.3	18740.4	28299
tr|A0A1D5TEK8|A0A1D5TEK8_WHEAT	A0A1D5TEK8	NA	Uncharacterized protein OS=Triticum aestivum PE=4 SV=1	697.54	0	12	tr|A0A1D5TEK8|A0A1D5TEK8_WHEAT	472651	740232	621063	521954	571509	0.20073	0.173077	NA	NA	118593	152430	154004	137489
tr|W5DWQ4|W5DWQ4_WHEAT	W5DWQ4	NA	Uncharacterized protein OS=Triticum aestivum PE=3 SV=1	199.9	0	4	tr|W5DWQ4|W5DWQ4_WHEAT	389602	298867	488239	511189	438921	0.231198	0	NA	NA	118475	98942.9	158921	163175
tr|A0A1D5SCV9|A0A1D5SCV9_WHEAT	A0A1D5SCV9	NA	Uncharacterized protein OS=Triticum aestivum PE=4 SV=1	84.85	0.0022309	1	tr|A0A1D5SCV9|A0A1D5SCV9_WHEAT	118201	155125	169976	171698	162550	0.16156	0	NA	NA	118201	155125	169976	171698
tr|A0A1D5V2U8|A0A1D5V2U8_WHEAT	A0A1D5V2U8	NA	Alpha-galactosidase OS=Triticum aestivum PE=3 SV=1	502.89	0	7	tr|A0A1D5V2U8|A0A1D5V2U8_WHEAT	548500	564504	856173	781455	672979	0.224858	0.1	NA	NA	118028	106845	243692	205423
tr|W5G5P6|W5G5P6_WHEAT	W5G5P6	NA	Uncharacterized protein OS=Triticum aestivum PE=4 SV=1	62.14	0.00728155	1	tr|W5G5P6|W5G5P6_WHEAT	117926	56425.7	90169.2	139660	104048	0.356149	0.166667	NA	NA	117926	56425.7	90169.2	139660
tr|A0A1D6BWG8|A0A1D6BWG8_WHEAT	A0A1D6BWG8	NA	Uncharacterized protein OS=Triticum aestivum PE=3 SV=1	326.9	0	8	tr|A0A1D6BWG8|A0A1D6BWG8_WHEAT	445845	769619	547408	520760	534084	0.243956	0.03125	NA	NA	117844	187216	151632	134447
tr|A0A1D5YRY5|A0A1D5YRY5_WHEAT	A0A1D5YRY5	NA	Uncharacterized protein OS=Triticum aestivum PE=4 SV=1	151.61	0	3	tr|A0A1D5YRY5|A0A1D5YRY5_WHEAT	352285	445836	125101	223166	287726	0.49253	0	NA	NA	117428	148612	41700.3	74388.7
tr|A0A1D5XA14|A0A1D5XA14_WHEAT	A0A1D5XA14	NA	Uncharacterized protein OS=Triticum aestivum PE=4 SV=1	656.06	0	13	tr|A0A1D5XA14|A0A1D5XA14_WHEAT	648857	464699	582121	632608	607364	0.14302	0.0192308	NA	NA	117146	97574	139154	163266
tr|A0A1D5XHD2|A0A1D5XHD2_WHEAT	A0A1D5XHD2	NA	Uncharacterized protein OS=Triticum aestivum PE=4 SV=1	829.31	0	14	tr|A0A1D5XHD2|A0A1D5XHD2_WHEAT	697302	807574	1.01379e+06	917550	862562	0.159298	0.0972222	NA	NA	117104	131787	239651	145183
tr|W5H4I6|W5H4I6_WHEAT	W5H4I6	NA	60S ribosomal protein L6 OS=Triticum aestivum PE=3 SV=1	502.82	0	5	tr|W5H4I6|W5H4I6_WHEAT	426616	1.38603e+06	1.76728e+06	1.63144e+06	1.50873e+06	0.464433	0.113636	NA	NA	116733	386518	474766	427803
tr|A0A1D5WT05|A0A1D5WT05_WHEAT	A0A1D5WT05	NA	DNA gyrase subunit B OS=Triticum aestivum PE=3 SV=1	401.53	0	8	tr|A0A1D5WT05|A0A1D5WT05_WHEAT	424306	442001	415277	501525	433154	0.0870108	0	NA	NA	116468	103461	93341.9	122336
tr|A0A1D5S9X6|A0A1D5S9X6_WHEAT	A0A1D5S9X6	NA	Uncharacterized protein OS=Triticum aestivum PE=4 SV=1	590.31	0	8	tr|A0A1D5S9X6|A0A1D5S9X6_WHEAT	512890	557926	740067	629588	593757	0.162374	0.0909091	NA	NA	115711	108440	174721	164066
tr|W5AY99|W5AY99_WHEAT	W5AY99	NA	Uncharacterized protein OS=Triticum aestivum PE=4 SV=1	486.19	0	7	tr|W5AY99|W5AY99_WHEAT	532012	537351	674524	711712	605938	0.151084	0.166667	NA	NA	115534	137546	198923	221484
tr|A0A096UW30|A0A096UW30_WHEAT	A0A096UW30	NA	Uncharacterized protein OS=Triticum aestivum PE=4 SV=1	485.1	0	8	tr|A0A096UW30|A0A096UW30_WHEAT	536270	457531	715588	646775	591523	0.194622	0.075	NA	NA	115502	96419.6	144532	153414
tr|A0A1D6ASH5|A0A1D6ASH5_WHEAT	A0A1D6ASH5	NA	Uncharacterized protein OS=Triticum aestivum PE=4 SV=1	87.45	0	2	tr|A0A1D6ASH5|A0A1D6ASH5_WHEAT	230842	327914	128017	100856	179430	0.526848	0.0833333	NA	NA	115421	163957	64008.6	50427.9
tr|A0A1D6BTY1|A0A1D6BTY1_WHEAT	A0A1D6BTY1	NA	Uncharacterized protein OS=Triticum aestivum PE=4 SV=1	978.53	0	18	tr|A0A1D6BTY1|A0A1D6BTY1_WHEAT	857771	1.29758e+06	789821	1.17441e+06	1.01609e+06	0.237709	0.0909091	NA	NA	115156	183078	118435	200486
tr|W5D7B8|W5D7B8_WHEAT	W5D7B8	NA	60S ribosomal protein L18a OS=Triticum aestivum PE=3 SV=1	586.74	0	8	tr|W5D7B8|W5D7B8_WHEAT	507693	2.32306e+06	1.25639e+06	2.80274e+06	1.78972e+06	0.60153	0.0454545	NA	NA	114675	495296	362298	860677
tr|W5FM56|W5FM56_WHEAT	W5FM56	NA	Uncharacterized protein OS=Triticum aestivum PE=3 SV=1	279.41	0	5	tr|W5FM56|W5FM56_WHEAT	376650	564171	464267	739070	514219	0.290147	0.03125	NA	NA	114541	153822	121481	220913
tr|W5G0E6|W5G0E6_WHEAT	W5G0E6	NA	Proteasome subunit alpha type OS=Triticum aestivum PE=3 SV=1	312.16	0	7	tr|W5G0E6|W5G0E6_WHEAT	434890	248649	252677	283783	268230	0.288543	0.142857	NA	NA	114048	75682.4	64326.9	78492.6
tr|A0A1D6D2Y6|A0A1D6D2Y6_WHEAT	A0A1D6D2Y6	NA	Uncharacterized protein OS=Triticum aestivum PE=4 SV=1	746.75	0	12	tr|A0A1D6D2Y6|A0A1D6D2Y6_WHEAT	555699	874501	476982	847500	701600	0.293128	0.1	NA	NA	113890	157003	103249	192959
tr|A0A1D6BMC0|A0A1D6BMC0_WHEAT	A0A1D6BMC0	NA	Xyloglucan endotransglucosylase/hydrolase OS=Triticum aestivum PE=3 SV=1	203.72	0	4	tr|A0A1D6BMC0|A0A1D6BMC0_WHEAT	341881	472236	137987	192670	267275	0.5277	0.125	NA	NA	113616	154015	45990.4	64218.2
tr|A0A1D5UFX4|A0A1D5UFX4_WHEAT	A0A1D5UFX4	NA	Uncharacterized protein OS=Triticum aestivum PE=4 SV=1	95.22	0.00175541	2	tr|A0A1D5UFX4|A0A1D5UFX4_WHEAT	226417	203309	100486	159797	181553	0.321089	0	NA	NA	113209	101655	50242.9	79898.5
tr|A0A1D6BSR9|A0A1D6BSR9_WHEAT	A0A1D6BSR9	NA	HVA22-like protein OS=Triticum aestivum PE=3 SV=1	59.92	0.00762268	1	tr|A0A1D6BSR9|A0A1D6BSR9_WHEAT	113122	186784	534260	320284	253534	0.640488	0.25	NA	NA	113122	186784	534260	320284
tr|A0A1D5ZZ17|A0A1D5ZZ17_WHEAT	A0A1D5ZZ17	NA	Uncharacterized protein OS=Triticum aestivum PE=4 SV=1	474.25	0	7	tr|A0A1D5ZZ17|A0A1D5ZZ17_WHEAT	496031	515771	3.76916e+06	2.40605e+06	1.46091e+06	0.88552	0.0227273	NA	NA	113018	130981	1.109e+06	754165
tr|A0A1D5YEU0|A0A1D5YEU0_WHEAT	A0A1D5YEU0	NA	Vacuolar protein sorting-associated protein 35 OS=Triticum aestivum PE=3 SV=1	331.68	0	6	tr|A0A1D5YEU0|A0A1D5YEU0_WHEAT	340647	343648	164906	282554	311601	0.295335	0.107143	NA	NA	112867	108713	43286.5	80231.7
tr|A0A1D6S4N6|A0A1D6S4N6_WHEAT	A0A1D6S4N6	NA	Uncharacterized protein OS=Triticum aestivum PE=4 SV=1	878.89	0	18	tr|A0A1D6S4N6|A0A1D6S4N6_WHEAT	690179	522842	696303	845173	693241	0.191284	0.25	NA	NA	112757	107418	139679	154462
sp|Q95H61|RR4_WHEAT	Q95H61	rps4	30S ribosomal protein S4, chloroplastic OS=Triticum aestivum GN=rps4 PE=3 SV=1	349.74	0	8	sp|Q95H61|RR4_WHEAT	482024	542337	281090	303854	392939	0.322003	0.138889	NA	NA	112744	144726	72775.8	81494.2
tr|A0A1D6DB26|A0A1D6DB26_WHEAT	A0A1D6DB26	NA	Uncharacterized protein OS=Triticum aestivum PE=3 SV=1	128.4	0	2	tr|A0A1D6DB26|A0A1D6DB26_WHEAT	225274	259047	54365.4	59979.1	142627	0.719692	0	NA	NA	112637	129524	27182.7	29989.6
tr|A0A1D6DM27|A0A1D6DM27_WHEAT	A0A1D6DM27	NA	Uncharacterized protein OS=Triticum aestivum PE=4 SV=1	142.67	0	4	tr|A0A1D6DM27|A0A1D6DM27_WHEAT	336367	224720	252385	248132	250259	0.184058	0.25	NA	NA	112007	67490	84118	79854.9
tr|A0A1D5ZVI6|A0A1D5ZVI6_WHEAT	A0A1D5ZVI6	NA	Uncharacterized protein OS=Triticum aestivum PE=4 SV=1	294.89	0	5	tr|A0A1D5ZVI6|A0A1D5ZVI6_WHEAT	370276	375924	676545	921562	526235	0.45301	0	NA	NA	111839	125000	212396	288214
tr|A0A0C4BFF4|A0A0C4BFF4_WHEAT	A0A0C4BFF4	NA	Signal recognition particle subunit SRP72 OS=Triticum aestivum PE=3 SV=1	599.4	0	11	tr|A0A0C4BFF4|A0A0C4BFF4_WHEAT	582317	349697	238656	503385	426541	0.367895	0.125	NA	NA	111713	88970.6	65456.3	107502
tr|A0A1D6CK38|A0A1D6CK38_WHEAT	A0A1D6CK38	NA	Uncharacterized protein OS=Triticum aestivum PE=4 SV=1	325.48	0	5	tr|A0A1D6CK38|A0A1D6CK38_WHEAT	387817	442803	222020	174000	304919	0.420497	0.214286	NA	NA	111591	127366	66043.5	54635.6
tr|A0A1D5Y5R8|A0A1D5Y5R8_WHEAT	A0A1D5Y5R8	NA	Uncharacterized protein OS=Triticum aestivum PE=4 SV=1	324.93	0	6	tr|A0A1D5Y5R8|A0A1D5Y5R8_WHEAT	353274	860919	683857	879467	772388	0.351244	0.125	NA	NA	111066	246037	220003	282551
tr|W5F6Q2|W5F6Q2_WHEAT	W5F6Q2	NA	Uncharacterized protein OS=Triticum aestivum PE=3 SV=1	75.71	0.00315457	1	tr|W5F6Q2|W5F6Q2_WHEAT	110703	167776	14134	21478.8	66090.8	0.941644	0	NA	NA	110703	167776	14134	21478.8
tr|A0A1D6D176|A0A1D6D176_WHEAT	A0A1D6D176	NA	Uncharacterized protein OS=Triticum aestivum PE=4 SV=1	454.41	0	12	tr|A0A1D6D176|A0A1D6D176_WHEAT	524528	506075	330191	452495	479285	0.193214	0.0769231	NA	NA	110571	116178	86151.8	100813
tr|W5CT81|W5CT81_WHEAT	W5CT81	TRAES_3BF091600090CFD_c1	Uncharacterized protein OS=Triticum aestivum GN=TRAES_3BF091600090CFD_c1 PE=4 SV=1	546.7	0	10	tr|W5CT81|W5CT81_WHEAT	519889	382802	473039	580952	496464	0.1708	0.145833	NA	NA	110562	76094.4	113277	151675
tr|A0A1D5UZ96|A0A1D5UZ96_WHEAT	A0A1D5UZ96	NA	RuvB-like helicase OS=Triticum aestivum PE=3 SV=1	588.44	0	12	tr|A0A1D5UZ96|A0A1D5UZ96_WHEAT	548554	601944	346157	367549	458051	0.275203	0.125	NA	NA	110493	110932	79024.5	90561.5
tr|A0A1D5ZY29|A0A1D5ZY29_WHEAT	A0A1D5ZY29	NA	Uncharacterized protein OS=Triticum aestivum PE=4 SV=1	269.69	0	6	tr|A0A1D5ZY29|A0A1D5ZY29_WHEAT	459519	541760	261714	416709	438114	0.279926	0.0833333	NA	NA	110233	150554	75488.5	120203
tr|A0A1D5TBY0|A0A1D5TBY0_WHEAT	A0A1D5TBY0	NA	Uncharacterized protein OS=Triticum aestivum PE=4 SV=1	490.08	0	6	tr|A0A1D5TBY0|A0A1D5TBY0_WHEAT	377173	403612	301387	635302	390392	0.335289	0.138889	NA	NA	110153	115325	78135.1	156192
tr|A0A1D6CW20|A0A1D6CW20_WHEAT	A0A1D6CW20	NA	Peroxidase OS=Triticum aestivum PE=3 SV=1	531.23	0	10	tr|A0A1D6CW20|A0A1D6CW20_WHEAT	567013	593497	605939	969452	599718	0.279263	0.0227273	NA	NA	110040	120626	126275	255520
tr|A0A1D6BNY5|A0A1D6BNY5_WHEAT	A0A1D6BNY5	NA	Uncharacterized protein OS=Triticum aestivum PE=4 SV=1	88.74	0.00227015	1	tr|A0A1D6BNY5|A0A1D6BNY5_WHEAT	109644	126472	32540.1	10451.6	71091.9	0.815328	0	NA	NA	109644	126472	32540.1	10451.6
tr|A0A1D6C1F1|A0A1D6C1F1_WHEAT	A0A1D6C1F1	NA	Uncharacterized protein OS=Triticum aestivum PE=4 SV=1	110.9	0.00187617	1	tr|A0A1D6C1F1|A0A1D6C1F1_WHEAT	109474	1067.82	261669	300571	185572	0.824117	0	NA	NA	109474	1067.82	261669	300571
tr|A0A1D6DAK0|A0A1D6DAK0_WHEAT	A0A1D6DAK0	NA	Eukaryotic translation initiation factor 3 subunit B OS=Triticum aestivum PE=3 SV=1	202.62	0	4	tr|A0A1D6DAK0|A0A1D6DAK0_WHEAT	328366	236873	146209	227010	231942	0.317705	0.125	NA	NA	109450	78640.1	44389.7	75665
tr|W5ASF3|W5ASF3_WHEAT	W5ASF3	NA	Uncharacterized protein OS=Triticum aestivum PE=3 SV=1	55.05	0.00969529	2	tr|W5ASF3|W5ASF3_WHEAT	218363	501730	377249	233409	305329	0.401355	0	NA	NA	109181	250865	188624	116705
tr|A0A1D5TRW7|A0A1D5TRW7_WHEAT	A0A1D5TRW7	NA	Uncharacterized protein OS=Triticum aestivum PE=3 SV=1	83.82	0.00221729	1	tr|A0A1D5TRW7|A0A1D5TRW7_WHEAT	109044	133816	47818.3	60755.1	84899.5	0.459937	0.375	NA	NA	109044	133816	47818.3	60755.1
tr|A0A1D5VLS5|A0A1D5VLS5_WHEAT	A0A1D5VLS5	NA	Uncharacterized protein OS=Triticum aestivum PE=4 SV=1	56.59	0.00931532	1	tr|A0A1D5VLS5|A0A1D5VLS5_WHEAT	218020	178416	145001	288272	198218	0.297012	0	NA	NA	109010	89207.9	72500.5	144136
tr|W5AZI9|W5AZI9_WHEAT	W5AZI9	NA	Uncharacterized protein OS=Triticum aestivum PE=3 SV=1	168.82	0	4	tr|W5AZI9|W5AZI9_WHEAT	327002	286203	533685	445581	386291	0.28349	0.1875	NA	NA	108995	95395.7	175876	139976
tr|A0A1D5VCF2|A0A1D5VCF2_WHEAT	A0A1D5VCF2	NA	Uncharacterized protein OS=Triticum aestivum PE=3 SV=1	436.83	0	8	tr|A0A1D5VCF2|A0A1D5VCF2_WHEAT	444812	411523	964218	1.00975e+06	704515	0.45713	0.0833333	NA	NA	108804	114086	220615	190050
tr|A0A0C4BJN1|A0A0C4BJN1_WHEAT	A0A0C4BJN1	NA	Uncharacterized protein OS=Triticum aestivum PE=3 SV=1	152.6	0	3	tr|A0A0C4BJN1|A0A0C4BJN1_WHEAT	325428	498335	444696	307074	385062	0.235049	0	NA	NA	108476	166112	148232	102358
tr|A0A1D6RKS0|A0A1D6RKS0_WHEAT	A0A1D6RKS0	NA	Uncharacterized protein OS=Triticum aestivum PE=4 SV=1	315.45	0	4	tr|A0A1D6RKS0|A0A1D6RKS0_WHEAT	360490	378426	476318	464413	421419	0.140311	0.125	NA	NA	108090	121640	145170	142767
tr|A0A1D5TK48|A0A1D5TK48_WHEAT	A0A1D5TK48	NA	Uncharacterized protein OS=Triticum aestivum PE=4 SV=1	286.65	0	4	tr|A0A1D5TK48|A0A1D5TK48_WHEAT	324095	147543	1.65632e+06	1.22899e+06	776542	0.860166	0.25	NA	NA	108027	49175.9	544963	367721
tr|A0A1D6DET0|A0A1D6DET0_WHEAT	A0A1D6DET0	NA	Uncharacterized protein OS=Triticum aestivum PE=4 SV=1	444.77	0	8	tr|A0A1D6DET0|A0A1D6DET0_WHEAT	467129	363419	665605	962516	566367	0.428883	0.0833333	NA	NA	107804	90972.3	158776	221023
tr|W5H208|W5H208_WHEAT	W5H208	NA	40S ribosomal protein S24 OS=Triticum aestivum PE=3 SV=1	203.44	0	4	tr|W5H208|W5H208_WHEAT	326792	256103	810777	930634	568784	0.583788	0	NA	NA	107621	84348.5	255075	292764
tr|A0A1D5XC94|A0A1D5XC94_WHEAT	A0A1D5XC94	NA	Histone H2A OS=Triticum aestivum PE=3 SV=1	96.71	0.001772	2	tr|A0A1D5XC94|A0A1D5XC94_WHEAT	214652	54022.2	133530	193454	163492	0.483412	0.3125	NA	NA	107326	27011.1	66765	96726.9
tr|A0A1D5W8R5|A0A1D5W8R5_WHEAT	A0A1D5W8R5	NA	Uncharacterized protein OS=Triticum aestivum PE=4 SV=1	62.99	0.00734214	1	tr|A0A1D5W8R5|A0A1D5W8R5_WHEAT	107171	278646	182151	119451	150801	0.456212	0	NA	NA	107171	278646	182151	119451
tr|W5GNC5|W5GNC5_WHEAT	W5GNC5	NA	Uncharacterized protein OS=Triticum aestivum PE=3 SV=1	206.6	0	4	tr|W5GNC5|W5GNC5_WHEAT	326294	276789	996354	933511	629903	0.607037	0	NA	NA	107096	91651.5	331264	310486
tr|W5CS80|W5CS80_WHEAT	W5CS80	TRAES_3BF046300060CFD_c1	Uncharacterized protein OS=Triticum aestivum GN=TRAES_3BF046300060CFD_c1 PE=4 SV=1	281.87	0	5	tr|W5CS80|W5CS80_WHEAT	376688	403854	483406	454193	429023	0.112155	0.0416667	NA	NA	106874	109453	138642	127831
tr|A0A1D6CEN7|A0A1D6CEN7_WHEAT	A0A1D6CEN7	NA	Uncharacterized protein OS=Triticum aestivum PE=4 SV=1	412.69	0	10	tr|A0A1D6CEN7|A0A1D6CEN7_WHEAT	534128	366107	473357	460503	466930	0.151522	0.115385	NA	NA	106832	71766.1	95249	97662
tr|A0A1D6DDV5|A0A1D6DDV5_WHEAT	A0A1D6DDV5	NA	Beta-galactosidase OS=Triticum aestivum PE=3 SV=1	162.62	0	3	tr|A0A1D6DDV5|A0A1D6DDV5_WHEAT	319762	503734	87407.3	54383.7	203585	0.874631	0.375	NA	NA	106587	167911	29135.8	18127.9
tr|W4ZUK2|W4ZUK2_WHEAT	W4ZUK2	NA	Uncharacterized protein OS=Triticum aestivum PE=4 SV=1	135.53	0	3	tr|W4ZUK2|W4ZUK2_WHEAT	319268	294655	306764	343553	313016	0.0661354	0	NA	NA	106423	98218.3	102255	114518
tr|A0A1D5V6K7|A0A1D5V6K7_WHEAT	A0A1D5V6K7	NA	Uncharacterized protein OS=Triticum aestivum PE=4 SV=1	409.91	0	7	tr|A0A1D5V6K7|A0A1D5V6K7_WHEAT	407797	481530	221454	241919	324858	0.375156	0.09375	NA	NA	106037	146104	50816.8	48749.9
tr|A0A1D6RWC5|A0A1D6RWC5_WHEAT	A0A1D6RWC5	NA	Uncharacterized protein OS=Triticum aestivum PE=4 SV=1	20.13	0.00505051	1	tr|A0A1D6RWC5|A0A1D6RWC5_WHEAT	106023	15.42	12421.5	53224.3	32822.9	1.11405	0.25	NA	NA	106023	15.42	12421.5	53224.3
tr|A0A1D5SXL0|A0A1D5SXL0_WHEAT	A0A1D5SXL0	NA	Uncharacterized protein OS=Triticum aestivum PE=3 SV=1	528.93	0	9	tr|A0A1D5SXL0|A0A1D5SXL0_WHEAT	500815	358193	226246	531278	429504	0.347796	0.075	NA	NA	105723	100683	44436.9	122918
tr|A0A1D6CC31|A0A1D6CC31_WHEAT	A0A1D6CC31	NA	Uncharacterized protein OS=Triticum aestivum PE=4 SV=1	540.24	0	12	tr|A0A1D6CC31|A0A1D6CC31_WHEAT	500555	439117	1.49684e+06	1.22568e+06	863117	0.575646	0.160714	NA	NA	104778	116177	377392	271922
sp|P29557|IF4E1_WHEAT	P29557	NA	Eukaryotic translation initiation factor 4E-1 OS=Triticum aestivum PE=1 SV=3	83.57	0.00276396	1	sp|P29557|IF4E1_WHEAT	104762	77628.8	18049.1	20644.3	49136.6	0.777051	0	NA	NA	104762	77628.8	18049.1	20644.3
tr|A0A1D5XJE9|A0A1D5XJE9_WHEAT	A0A1D5XJE9	NA	Uncharacterized protein OS=Triticum aestivum PE=4 SV=1	453.92	0	6	tr|A0A1D5XJE9|A0A1D5XJE9_WHEAT	394664	519074	1.02339e+06	1.22551e+06	771234	0.502646	0.075	NA	NA	104467	139984	303289	390425
tr|A0A1D6A8J7|A0A1D6A8J7_WHEAT	A0A1D6A8J7	NA	Uncharacterized protein OS=Triticum aestivum PE=4 SV=1	281.43	0	3	tr|A0A1D6A8J7|A0A1D6A8J7_WHEAT	312783	177940	74087.4	183816	180878	0.522268	0.3	NA	NA	104182	59308.1	24685.5	61267
tr|A0A1D6APK3|A0A1D6APK3_WHEAT	A0A1D6APK3	NA	S-(hydroxymethyl)glutathione dehydrogenase OS=Triticum aestivum PE=3 SV=1	313.18	0	7	tr|A0A1D6APK3|A0A1D6APK3_WHEAT	384202	361257	355552	498357	372730	0.16715	0.107143	NA	NA	104133	113223	95902.2	134410
tr|A0A1D5W7I4|A0A1D5W7I4_WHEAT	A0A1D5W7I4	NA	Ribosomal protein OS=Triticum aestivum PE=3 SV=1	691.1	0	7	tr|A0A1D5W7I4|A0A1D5W7I4_WHEAT	370837	1.94334e+06	2.90581e+06	3.27245e+06	2.42458e+06	0.610276	0.0892857	NA	NA	103321	521960	855955	988153
tr|A0A1D5YFF8|A0A1D5YFF8_WHEAT	A0A1D5YFF8	NA	Uncharacterized protein OS=Triticum aestivum PE=4 SV=1	391.69	0	4	tr|A0A1D5YFF8|A0A1D5YFF8_WHEAT	359618	349825	364158	379457	361888	0.0339731	0.107143	NA	NA	103216	94882.3	112431	121374
tr|A0A1D6BVG0|A0A1D6BVG0_WHEAT	A0A1D6BVG0	NA	Uncharacterized protein OS=Triticum aestivum PE=4 SV=1	96	0.00176574	1	tr|A0A1D6BVG0|A0A1D6BVG0_WHEAT	103188	182303	7290.89	14137.6	58662.9	1.07958	0	NA	NA	103188	182303	7290.89	14137.6
tr|W5F5C1|W5F5C1_WHEAT	W5F5C1	NA	Uncharacterized protein OS=Triticum aestivum PE=3 SV=1	259.33	0	5	tr|W5F5C1|W5F5C1_WHEAT	426371	404129	218014	480022	415250	0.298211	0.0416667	NA	NA	103182	119519	58488.2	155562
tr|A0A1D5RY45|A0A1D5RY45_WHEAT	A0A1D5RY45	NA	Uncharacterized protein OS=Triticum aestivum PE=4 SV=1	243.54	0	5	tr|A0A1D5RY45|A0A1D5RY45_WHEAT	331504	156753	403506	447400	367505	0.382168	0.0833333	NA	NA	103165	46311.8	119428	148794
tr|A0A1D5Z634|A0A1D5Z634_WHEAT	A0A1D5Z634	NA	Uncharacterized protein OS=Triticum aestivum PE=4 SV=1	222.65	0	3	tr|A0A1D5Z634|A0A1D5Z634_WHEAT	309168	343442	339917	569538	341680	0.308147	0	NA	NA	103056	114481	113306	189846
tr|A0A096URN5|A0A096URN5_WHEAT	A0A096URN5	NA	Uncharacterized protein OS=Triticum aestivum PE=4 SV=1	60.61	0.00766651	1	tr|A0A096URN5|A0A096URN5_WHEAT	102945	104506	140266	86624.5	103725	0.208276	0	NA	NA	102945	104506	140266	86624.5
tr|A0A1D5TRR7|A0A1D5TRR7_WHEAT	A0A1D5TRR7	NA	Uncharacterized protein OS=Triticum aestivum PE=3 SV=1	233.72	0	7	tr|A0A1D5TRR7|A0A1D5TRR7_WHEAT	329437	416787	373215	460281	395001	0.142559	0.25	NA	NA	102874	117491	121249	151851
tr|A0A1D5UB51|A0A1D5UB51_WHEAT	A0A1D5UB51	NA	Pyruvate kinase OS=Triticum aestivum PE=3 SV=1	170.02	0	3	tr|A0A1D5UB51|A0A1D5UB51_WHEAT	307789	344961	132505	54516.5	220147	0.662055	0.25	NA	NA	102596	114987	44168.3	18172.2
tr|A0A1D5YBK8|A0A1D5YBK8_WHEAT	A0A1D5YBK8	NA	Uncharacterized protein OS=Triticum aestivum PE=4 SV=1	429.61	0	9	tr|A0A1D5YBK8|A0A1D5YBK8_WHEAT	401371	399915	940376	1.31319e+06	670874	0.584003	0.160714	NA	NA	102310	107732	227793	345438
tr|A0A1D6BQG5|A0A1D6BQG5_WHEAT	A0A1D6BQG5	NA	Uncharacterized protein OS=Triticum aestivum PE=4 SV=1	363	0	11	tr|A0A1D6BQG5|A0A1D6BQG5_WHEAT	357879	349306	498087	483542	420711	0.188356	0.0681818	NA	NA	102296	87805.2	89838.8	90759.3
tr|W5AP12|W5AP12_WHEAT	W5AP12	NA	DNA-directed RNA polymerase subunit OS=Triticum aestivum PE=3 SV=1	419.38	0	11	tr|W5AP12|W5AP12_WHEAT	535486	415081	188015	131376	301548	0.598855	0.125	NA	NA	102083	88250.1	50926.1	34029.5
tr|A0A1D6AX23|A0A1D6AX23_WHEAT	A0A1D6AX23	NA	Uncharacterized protein OS=Triticum aestivum PE=4 SV=1	214.06	0	5	tr|A0A1D6AX23|A0A1D6AX23_WHEAT	357302	411170	255689	379603	368453	0.19159	0.15	NA	NA	101805	110893	84331.5	126524
tr|A0A1D5UX39|A0A1D5UX39_WHEAT	A0A1D5UX39	NA	Uncharacterized protein OS=Triticum aestivum PE=4 SV=1	125.9	0	3	tr|A0A1D5UX39|A0A1D5UX39_WHEAT	305083	223633	114656	81816.2	169144	0.564778	0.0833333	NA	NA	101694	74544.2	38218.8	27272.1
tr|F4Y590|F4Y590_WHEAT	F4Y590	Hsp90.1-B1	Heat shock protein 90 OS=Triticum aestivum GN=Hsp90.1-B1 PE=2 SV=1	521.68	0	11	tr|F4Y590|F4Y590_WHEAT	556945	367745	1.03962e+06	880781	718863	0.428268	0.0535714	NA	NA	101205	84925.8	260532	190343
tr|A0A1D5VRQ9|A0A1D5VRQ9_WHEAT	A0A1D5VRQ9	NA	Uncharacterized protein OS=Triticum aestivum PE=3 SV=1	418.92	0	8	tr|A0A1D5VRQ9|A0A1D5VRQ9_WHEAT	440873	453211	479172	501595	466191	0.0578545	0.0555556	NA	NA	101204	114638	112573	109785
tr|A0A0C4BJE9|A0A0C4BJE9_WHEAT	A0A0C4BJE9	NA	Nascent polypeptide-associated complex subunit beta OS=Triticum aestivum PE=3 SV=1	150.41	0	4	tr|A0A0C4BJE9|A0A0C4BJE9_WHEAT	303896	440960	63003.6	112141	208019	0.760324	0.0625	NA	NA	100701	142421	20353.1	37375.1
tr|A0A1D5SQG1|A0A1D5SQG1_WHEAT	A0A1D5SQG1	NA	Uncharacterized protein OS=Triticum aestivum PE=4 SV=1	622.8	0	9	tr|A0A1D5SQG1|A0A1D5SQG1_WHEAT	450922	663636	512325	567528	539927	0.164553	0.0666667	NA	NA	100683	126839	91389.6	104088
tr|W5ES72|W5ES72_WHEAT	W5ES72	NA	Uncharacterized protein OS=Triticum aestivum PE=4 SV=1	470.68	0	8	tr|W5ES72|W5ES72_WHEAT	493744	633326	534948	534338	534643	0.108135	0.0909091	NA	NA	100656	130682	121393	109281
tr|A0A1D5Z2R3|A0A1D5Z2R3_WHEAT	A0A1D5Z2R3	NA	Uncharacterized protein OS=Triticum aestivum PE=4 SV=1	624.07	0	13	tr|A0A1D5Z2R3|A0A1D5Z2R3_WHEAT	513946	670283	453881	954234	592114	0.344944	0.171875	NA	NA	100650	139305	77574.7	205139
tr|A0A1D5TMB6|A0A1D5TMB6_WHEAT	A0A1D5TMB6	NA	Uncharacterized protein OS=Triticum aestivum PE=4 SV=1	410.46	0	8	tr|A0A1D5TMB6|A0A1D5TMB6_WHEAT	494607	449339	551378	491806	493207	0.0842968	0	NA	NA	99834.6	104845	111917	114302
sp|P11383|RBL_WHEAT	P11383	rbcL	Ribulose bisphosphate carboxylase large chain OS=Triticum aestivum GN=rbcL PE=1 SV=2	472.97	0	10	sp|P11383|RBL_WHEAT	497966	602391	668405	921547	635398	0.267928	0.0384615	NA	NA	99686.8	111511	171143	215864
tr|A0A1D5TAS9|A0A1D5TAS9_WHEAT	A0A1D5TAS9	NA	Uncharacterized protein OS=Triticum aestivum PE=3 SV=1	64.33	0.00740375	1	tr|A0A1D5TAS9|A0A1D5TAS9_WHEAT	99683.5	106093	99832.8	177669	102963	0.31466	0	NA	NA	99683.5	106093	99832.8	177669
tr|A0A1D5UUN4|A0A1D5UUN4_WHEAT	A0A1D5UUN4	NA	Small ubiquitin-related modifier OS=Triticum aestivum PE=3 SV=1	295.2	0	4	tr|A0A1D5UUN4|A0A1D5UUN4_WHEAT	327666	339077	1.34844e+06	1.33161e+06	835345	0.694696	0.0833333	NA	NA	99665.6	113021	434231	425524
tr|A0A1D5WQ86|A0A1D5WQ86_WHEAT	A0A1D5WQ86	NA	Peroxidase OS=Triticum aestivum PE=3 SV=1	158.6	0	3	tr|A0A1D5WQ86|A0A1D5WQ86_WHEAT	298743	121850	243323	332479	271033	0.371149	0.166667	NA	NA	99580.9	40616.5	81107.7	110826
tr|W5ECI3|W5ECI3_WHEAT	W5ECI3	NA	Uncharacterized protein OS=Triticum aestivum PE=4 SV=1	154.51	0	5	tr|W5ECI3|W5ECI3_WHEAT	315744	110860	37165	33088.8	74012.3	1.06746	0.15	NA	NA	99534.1	36932.5	12376.5	10564
tr|A0A1D6S4M6|A0A1D6S4M6_WHEAT	A0A1D6S4M6	NA	Uncharacterized protein OS=Triticum aestivum PE=4 SV=1	672.49	0	12	tr|A0A1D6S4M6|A0A1D6S4M6_WHEAT	584789	493990	667733	897414	626261	0.261514	0.0882353	NA	NA	99155.9	87900	102380	172471
tr|A0A1D5VCF0|A0A1D5VCF0_WHEAT	A0A1D5VCF0	NA	Uncharacterized protein OS=Triticum aestivum PE=4 SV=1	505.99	0	11	tr|A0A1D5VCF0|A0A1D5VCF0_WHEAT	443066	367160	571521	715219	507293	0.29132	0.125	NA	NA	99091.4	89311.1	120645	144685
tr|A0A1D6AG39|A0A1D6AG39_WHEAT	A0A1D6AG39	NA	Uncharacterized protein OS=Triticum aestivum PE=4 SV=1	849.81	0	12	tr|A0A1D6AG39|A0A1D6AG39_WHEAT	619433	679345	666925	630307	648616	0.0441739	0.1625	NA	NA	99057.2	104162	133730	142672
tr|A0A1D5SJ66|A0A1D5SJ66_WHEAT	A0A1D5SJ66	NA	Uncharacterized protein OS=Triticum aestivum PE=3 SV=1	273.34	0	5	tr|A0A1D5SJ66|A0A1D5SJ66_WHEAT	349870	348196	489083	515073	419476	0.209134	0	NA	NA	98973.2	106507	134840	143161
tr|A0A1D5XHR1|A0A1D5XHR1_WHEAT	A0A1D5XHR1	NA	Uncharacterized protein OS=Triticum aestivum PE=4 SV=1	1460.84	0	22	tr|A0A1D5XHR1|A0A1D5XHR1_WHEAT	956072	1.38368e+06	1.53081e+06	2.01483e+06	1.45724e+06	0.296797	0.112903	NA	NA	98592.6	169518	180816	244509
tr|A0A1D6BHS4|A0A1D6BHS4_WHEAT	A0A1D6BHS4	NA	Uncharacterized protein OS=Triticum aestivum PE=3 SV=1	497.65	0	12	tr|A0A1D6BHS4|A0A1D6BHS4_WHEAT	471619	282157	465133	570026	468376	0.26845	0.0961538	NA	NA	98123.8	59452.7	114720	132219
tr|A0A1D5UM13|A0A1D5UM13_WHEAT	A0A1D5UM13	NA	Uncharacterized protein OS=Triticum aestivum PE=4 SV=1	492.11	0	11	tr|A0A1D5UM13|A0A1D5UM13_WHEAT	481635	436307	157551	146612	296929	0.583265	0.181818	NA	NA	98036.5	93869.8	41420.8	40181.1
tr|A0A1D6A8D7|A0A1D6A8D7_WHEAT	A0A1D6A8D7	NA	Uncharacterized protein OS=Triticum aestivum PE=3 SV=1	133.7	0	3	tr|A0A1D6A8D7|A0A1D6A8D7_WHEAT	297947	74103.6	233154	197896	215525	0.468509	0	NA	NA	97876.8	24562.2	68422.8	65681.9
tr|A0A1D5UI94|A0A1D5UI94_WHEAT	A0A1D5UI94	NA	Uncharacterized protein OS=Triticum aestivum PE=4 SV=1	228.99	0	4	tr|A0A1D5UI94|A0A1D5UI94_WHEAT	293361	286525	1.44373e+06	885441	589401	0.761807	0	NA	NA	97774.4	95470.8	461378	280685
tr|A0A1D5S7M3|A0A1D5S7M3_WHEAT	A0A1D5S7M3	NA	Uncharacterized protein OS=Triticum aestivum PE=4 SV=1	57.58	0.0088993	1	tr|A0A1D5S7M3|A0A1D5S7M3_WHEAT	97707.8	49521.6	9322.03	2783.25	29421.8	1.09877	0	NA	NA	97707.8	49521.6	9322.03	2783.25
tr|W5ERW2|W5ERW2_WHEAT	W5ERW2	NA	Uncharacterized protein OS=Triticum aestivum PE=3 SV=1	160.3	0	2	tr|W5ERW2|W5ERW2_WHEAT	195328	182267	685610	732045	440469	0.670401	0	NA	NA	97664.2	91133.6	342805	366023
tr|A0A1D6AHB3|A0A1D6AHB3_WHEAT	A0A1D6AHB3	NA	Carboxypeptidase OS=Triticum aestivum PE=3 SV=1	156.99	0	4	tr|A0A1D6AHB3|A0A1D6AHB3_WHEAT	292986	237258	258828	332493	275907	0.148463	0.2	NA	NA	97656.8	79080.9	86271	110826
tr|A0A1D5TSJ6|A0A1D5TSJ6_WHEAT	A0A1D5TSJ6	NA	Uncharacterized protein OS=Triticum aestivum PE=4 SV=1	113.87	0.00189753	3	tr|A0A1D5TSJ6|A0A1D5TSJ6_WHEAT	292256	266763	250118	275653	271208	0.0648285	0.375	NA	NA	97418.6	88920.9	83372.8	91884.5
tr|A0A1D5S4D6|A0A1D5S4D6_WHEAT	A0A1D5S4D6	NA	Uncharacterized protein OS=Triticum aestivum PE=4 SV=1	361.52	0	5	tr|A0A1D5S4D6|A0A1D5S4D6_WHEAT	357362	431363	178741	316016	336689	0.330628	0.09375	NA	NA	97194.3	117389	50210.9	96717.5
tr|W5EQ17|W5EQ17_WHEAT	W5EQ17	NA	Uncharacterized protein OS=Triticum aestivum PE=3 SV=1	111.88	0.00188324	2	tr|W5EQ17|W5EQ17_WHEAT	291546	79990.5	103592	105770	104681	0.676494	0.0833333	NA	NA	97182	26663.5	34530.6	35256.7
tr|A0A1D5U390|A0A1D5U390_WHEAT	A0A1D5U390	NA	Uncharacterized protein OS=Triticum aestivum PE=3 SV=1	969.47	0	20	tr|A0A1D5U390|A0A1D5U390_WHEAT	784219	579500	936182	1.00096e+06	860201	0.226986	0.136364	NA	NA	97126.2	88143.9	186448	154935
tr|A0A1D5V1J7|A0A1D5V1J7_WHEAT	A0A1D5V1J7	NA	Uncharacterized protein OS=Triticum aestivum PE=4 SV=1	252.11	0	6	tr|A0A1D5V1J7|A0A1D5V1J7_WHEAT	332381	372670	173918	258947	295664	0.30744	0.0357143	NA	NA	96962.2	97913.5	49227.1	73149.1
tr|A0A1D6C3I5|A0A1D6C3I5_WHEAT	A0A1D6C3I5	NA	Uncharacterized protein OS=Triticum aestivum PE=4 SV=1	718.57	0	16	tr|A0A1D6C3I5|A0A1D6C3I5_WHEAT	590880	571814	1.10641e+06	1.16936e+06	848647	0.375094	0.0394737	NA	NA	96565.4	79771.7	193785	230378
tr|A0A1D6BWW3|A0A1D6BWW3_WHEAT	A0A1D6BWW3	NA	Uncharacterized protein OS=Triticum aestivum PE=4 SV=1	243.75	0	4	tr|A0A1D6BWW3|A0A1D6BWW3_WHEAT	298961	617220	402012	607818	504915	0.326212	0.0833333	NA	NA	96347.7	199456	115509	187678
tr|A0A1D5VGX6|A0A1D5VGX6_WHEAT	A0A1D5VGX6	NA	Uncharacterized protein OS=Triticum aestivum PE=4 SV=1	125.81	0	2	tr|A0A1D5VGX6|A0A1D5VGX6_WHEAT	192676	229060	13044.6	16560.9	104618	1.0119	0.166667	NA	NA	96337.8	114530	6522.29	8280.46
tr|A0A1D6RN26|A0A1D6RN26_WHEAT	A0A1D6RN26	NA	Uncharacterized protein OS=Triticum aestivum PE=4 SV=1	134.8	0	2	tr|A0A1D6RN26|A0A1D6RN26_WHEAT	192126	615515	88796.1	70354.9	140461	1.05465	0	NA	NA	96063.2	307757	44398	35177.4
tr|A0A1D5YJ67|A0A1D5YJ67_WHEAT	A0A1D5YJ67	NA	Uncharacterized protein OS=Triticum aestivum PE=3 SV=1	369.23	0	8	tr|A0A1D5YJ67|A0A1D5YJ67_WHEAT	347386	203783	242776	373801	295081	0.279433	0.194444	NA	NA	95924.8	57202.1	72743.6	108327
tr|W5BI11|W5BI11_WHEAT	W5BI11	NA	Uncharacterized protein OS=Triticum aestivum PE=4 SV=1	385.71	0	6	tr|W5BI11|W5BI11_WHEAT	316470	625240	390839	200209	353655	0.468242	0.09375	NA	NA	95817.3	188285	99435.1	58740.1
tr|A0A1D5Z194|A0A1D5Z194_WHEAT	A0A1D5Z194	NA	Uncharacterized protein OS=Triticum aestivum PE=4 SV=1	545.58	0	8	tr|A0A1D5Z194|A0A1D5Z194_WHEAT	457517	195329	439771	750479	448644	0.493056	0.113636	NA	NA	95795.9	56449.6	70112.8	148284
tr|A0A1D5VH91|A0A1D5VH91_WHEAT	A0A1D5VH91	NA	Uncharacterized protein OS=Triticum aestivum PE=3 SV=1	286.76	0	2	tr|A0A1D5VH91|A0A1D5VH91_WHEAT	287385	319630	745446	944503	532538	0.562959	0	NA	NA	95795	106543	248482	314834
tr|W5FGI6|W5FGI6_WHEAT	W5FGI6	NA	Uncharacterized protein OS=Triticum aestivum PE=3 SV=1	60.15	0.00763723	1	tr|W5FGI6|W5FGI6_WHEAT	95465.6	118258	5076.85	15991.4	55728.5	0.963639	0	NA	NA	95465.6	118258	5076.85	15991.4
tr|A0A1D5YQZ4|A0A1D5YQZ4_WHEAT	A0A1D5YQZ4	NA	Peptidyl-prolyl cis-trans isomerase OS=Triticum aestivum PE=4 SV=1	208.48	0	6	tr|A0A1D5YQZ4|A0A1D5YQZ4_WHEAT	305990	336241	572359	492155	414198	0.297236	0.107143	NA	NA	95300.5	106846	183695	157009
tr|W4ZUL1|W4ZUL1_WHEAT	W4ZUL1	NA	Uncharacterized protein OS=Triticum aestivum PE=4 SV=1	140.74	0	4	tr|W4ZUL1|W4ZUL1_WHEAT	285716	200500	271365	428540	278541	0.322282	0.125	NA	NA	95233.6	66828.2	90069.9	140870
tr|A0A1D5YQX6|A0A1D5YQX6_WHEAT	A0A1D5YQX6	NA	DNA topoisomerase OS=Triticum aestivum PE=3 SV=1	463.79	0	9	tr|A0A1D5YQX6|A0A1D5YQX6_WHEAT	453827	358725	202895	337972	348349	0.305709	0.125	NA	NA	95043.6	85465.7	55538.6	95473.6
tr|A0A077S0B2|A0A077S0B2_WHEAT	A0A077S0B2	TRAES_3BF092700010CFD_c1	Uncharacterized protein OS=Triticum aestivum GN=TRAES_3BF092700010CFD_c1 PE=4 SV=1	298.81	0	5	tr|A0A077S0B2|A0A077S0B2_WHEAT	363302	502403	717236	861385	609820	0.362397	0.142857	NA	NA	94834	153511	238956	276263
tr|A0A1D5SX23|A0A1D5SX23_WHEAT	A0A1D5SX23	NA	FRIGIDA-like protein OS=Triticum aestivum PE=3 SV=1	141.08	0	3	tr|A0A1D5SX23|A0A1D5SX23_WHEAT	284407	520219	104399	222535	253471	0.618461	0	NA	NA	94802.3	173406	34799.6	74178.3
tr|A0A1D6RQV0|A0A1D6RQV0_WHEAT	A0A1D6RQV0	NA	Uncharacterized protein OS=Triticum aestivum PE=4 SV=1	299.27	0	5	tr|A0A1D6RQV0|A0A1D6RQV0_WHEAT	369867	395717	292025	317023	343445	0.138257	0	NA	NA	94740.5	111121	82906.7	86437.3
tr|Q35980|Q35980_WHEAT	Q35980	nad9	30 kDa subunit of complex I NADH dehydrogenase OS=Triticum aestivum GN=nad9 PE=4 SV=1	101.52	0.00180288	2	tr|Q35980|Q35980_WHEAT	189468	181898	343702	97323.6	185683	0.505278	0	NA	NA	94733.8	90948.9	171851	48661.8
tr|A0A1D6BZ07|A0A1D6BZ07_WHEAT	A0A1D6BZ07	NA	Uncharacterized protein OS=Triticum aestivum PE=4 SV=1	57.7	0.00891182	1	tr|A0A1D6BZ07|A0A1D6BZ07_WHEAT	94730.6	120368	284363	269653	195011	0.512684	0	NA	NA	94730.6	120368	284363	269653
tr|A0A1D6ACR5|A0A1D6ACR5_WHEAT	A0A1D6ACR5	NA	Uncharacterized protein OS=Triticum aestivum PE=4 SV=1	56.55	0.00931099	1	tr|A0A1D6ACR5|A0A1D6ACR5_WHEAT	94581	24854.4	53702.4	86409.9	70056.1	0.49322	0	NA	NA	94581	24854.4	53702.4	86409.9
tr|A0A1D5YQ65|A0A1D5YQ65_WHEAT	A0A1D5YQ65	NA	Tubulin beta chain OS=Triticum aestivum PE=3 SV=1	59.16	0.00806069	2	tr|A0A1D5YQ65|A0A1D5YQ65_WHEAT	189034	98324.5	14550.2	35350.9	66837.7	0.929526	0	NA	NA	94516.9	49162.2	7275.09	17675.4
tr|A0A1D5XID5|A0A1D5XID5_WHEAT	A0A1D5XID5	NA	Uncharacterized protein OS=Triticum aestivum PE=3 SV=1	250.32	0	4	tr|A0A1D5XID5|A0A1D5XID5_WHEAT	286962	578135	682837	1.36528e+06	630486	0.626781	0.107143	NA	NA	94339.3	172840	180007	433187
tr|W5AN44|W5AN44_WHEAT	W5AN44	NA	Uncharacterized protein OS=Triticum aestivum PE=4 SV=1	254.76	0	8	tr|W5AN44|W5AN44_WHEAT	425029	290752	605185	439703	432366	0.292666	0	NA	NA	93883.4	71254.8	127226	105673
tr|W5B9Z5|W5B9Z5_WHEAT	W5B9Z5	NA	Uncharacterized protein OS=Triticum aestivum PE=4 SV=1	102.1	0.00180723	1	tr|W5B9Z5|W5B9Z5_WHEAT	93695.1	505933	388461	539877	447197	0.531036	0	NA	NA	93695.1	505933	388461	539877
tr|A0A1D5TV43|A0A1D5TV43_WHEAT	A0A1D5TV43	NA	Serine hydroxymethyltransferase OS=Triticum aestivum PE=3 SV=1	400.52	0	8	tr|A0A1D5TV43|A0A1D5TV43_WHEAT	436591	396077	597762	582036	509313	0.202272	0.0277778	NA	NA	93507.5	98923.6	137846	153148
tr|A0A1D5VE62|A0A1D5VE62_WHEAT	A0A1D5VE62	NA	Uncharacterized protein OS=Triticum aestivum PE=3 SV=1	632.85	0	10	tr|A0A1D5VE62|A0A1D5VE62_WHEAT	365407	1.01709e+06	689089	867715	778402	0.381604	0.192308	NA	NA	93334.6	238730	145543	186302
tr|A0A1D5TBX3|A0A1D5TBX3_WHEAT	A0A1D5TBX3	NA	D-3-phosphoglycerate dehydrogenase OS=Triticum aestivum PE=3 SV=1	275.96	0	5	tr|A0A1D5TBX3|A0A1D5TBX3_WHEAT	284314	271003	202469	351755	277659	0.220589	0.25	NA	NA	93240.2	87354.5	62451.7	112545
tr|A0A1D6CZ33|A0A1D6CZ33_WHEAT	A0A1D6CZ33	NA	Uncharacterized protein OS=Triticum aestivum PE=4 SV=1	774.49	0	14	tr|A0A1D6CZ33|A0A1D6CZ33_WHEAT	492039	749210	248654	325656	408847	0.488084	0.15	NA	NA	93131	127565	56309.2	77305.4
sp|P20858|ATPB_WHEAT	P20858	atpB	ATP synthase subunit beta, chloroplastic OS=Triticum aestivum GN=atpB PE=3 SV=1	261.28	0	3	sp|P20858|ATPB_WHEAT	278045	312093	368948	375707	340520	0.140252	0.3	NA	NA	92681.8	104031	122983	125236
tr|A0A1D5V8R9|A0A1D5V8R9_WHEAT	A0A1D5V8R9	NA	Uncharacterized protein OS=Triticum aestivum PE=4 SV=1	359.93	0	8	tr|A0A1D5V8R9|A0A1D5V8R9_WHEAT	473514	468129	477653	588723	475584	0.115424	0.0555556	NA	NA	92644.9	93819.5	114548	146310
tr|A0A1D5WZP2|A0A1D5WZP2_WHEAT	A0A1D5WZP2	NA	Uncharacterized protein OS=Triticum aestivum PE=4 SV=1	477.94	0	11	tr|A0A1D5WZP2|A0A1D5WZP2_WHEAT	519900	724275	582941	1.09528e+06	653608	0.352724	0.0576923	NA	NA	92617.8	158948	131612	249453
tr|A0A1D6CLU4|A0A1D6CLU4_WHEAT	A0A1D6CLU4	NA	Uncharacterized protein OS=Triticum aestivum PE=4 SV=1	594.17	0	10	tr|A0A1D6CLU4|A0A1D6CLU4_WHEAT	334036	537309	742010	1.05619e+06	639659	0.461655	0.134615	NA	NA	92234	134709	203805	249972
tr|A0A1D6A8N9|A0A1D6A8N9_WHEAT	A0A1D6A8N9	NA	ATP-dependent Clp protease proteolytic subunit OS=Triticum aestivum PE=3 SV=1	371.07	0	6	tr|A0A1D6A8N9|A0A1D6A8N9_WHEAT	420204	586103	1.17861e+06	2.57999e+06	882356	0.823862	0.075	NA	NA	92209.5	170204	336711	828568
tr|A0A1D5XTH4|A0A1D5XTH4_WHEAT	A0A1D5XTH4	NA	Uncharacterized protein OS=Triticum aestivum PE=4 SV=1	168.36	0	2	tr|A0A1D5XTH4|A0A1D5XTH4_WHEAT	184135	300466	12250.3	6450.45	98192.8	1.13373	0.0833333	NA	NA	92067.6	150233	6125.16	3225.22
tr|A0A1D5RRD3|A0A1D5RRD3_WHEAT	A0A1D5RRD3	NA	60S ribosomal protein L29 OS=Triticum aestivum PE=3 SV=1	268.18	0	4	tr|A0A1D5RRD3|A0A1D5RRD3_WHEAT	276094	2.00048e+06	1.2667e+07	1.30534e+07	7.33374e+06	0.97239	0.142857	NA	NA	92026.2	649727	4.22233e+06	4.35114e+06
tr|A0A1D6BD14|A0A1D6BD14_WHEAT	A0A1D6BD14	NA	Glyceraldehyde-3-phosphate dehydrogenase OS=Triticum aestivum PE=3 SV=1	284.24	0	5	tr|A0A1D6BD14|A0A1D6BD14_WHEAT	309801	433876	73234.3	411923	360862	0.537375	0.125	NA	NA	91858.7	137226	22567.3	136662
tr|W5GI50|W5GI50_WHEAT	W5GI50	NA	60S ribosomal protein L6 OS=Triticum aestivum PE=3 SV=1	75.25	0.00367069	1	tr|W5GI50|W5GI50_WHEAT	91651	364080	168575	138247	153411	0.628823	0	NA	NA	91651	364080	168575	138247
tr|A0A1D5TFP9|A0A1D5TFP9_WHEAT	A0A1D5TFP9	NA	Uncharacterized protein OS=Triticum aestivum PE=4 SV=1	481.38	0	8	tr|A0A1D5TFP9|A0A1D5TFP9_WHEAT	332655	381853	572461	569754	475803	0.269499	0.0833333	NA	NA	91608.7	109144	141179	142587
tr|A0A1D5YKH5|A0A1D5YKH5_WHEAT	A0A1D5YKH5	NA	Uncharacterized protein OS=Triticum aestivum PE=3 SV=1	144.55	0	2	tr|A0A1D5YKH5|A0A1D5YKH5_WHEAT	183044	271863	15950.8	3977.55	99497.4	1.10177	0.125	NA	NA	91522	135931	7975.39	1988.77
tr|A0A1D6RRD8|A0A1D6RRD8_WHEAT	A0A1D6RRD8	NA	Uncharacterized protein OS=Triticum aestivum PE=3 SV=1	352.6	0	9	tr|A0A1D6RRD8|A0A1D6RRD8_WHEAT	376452	144594	396817	598885	386634	0.490125	0.0555556	NA	NA	91460.2	40549.3	97368.5	134562
tr|A0A1D6DEC2|A0A1D6DEC2_WHEAT	A0A1D6DEC2	NA	Eukaryotic translation initiation factor 3 subunit F OS=Triticum aestivum PE=3 SV=1	199.01	0	4	tr|A0A1D6DEC2|A0A1D6DEC2_WHEAT	298251	150428	151825	195883	173854	0.348526	0.0625	NA	NA	91263.6	50137.6	47000.5	62704.4
tr|A0A1D6A7M6|A0A1D6A7M6_WHEAT	A0A1D6A7M6	NA	Uncharacterized protein OS=Triticum aestivum PE=4 SV=1	285.15	0	3	tr|A0A1D6A7M6|A0A1D6A7M6_WHEAT	286304	148375	291663	351455	288983	0.318979	0.125	NA	NA	90993.6	49453.1	82078.9	117123
tr|A0A1D5VFD4|A0A1D5VFD4_WHEAT	A0A1D5VFD4	NA	Uncharacterized protein OS=Triticum aestivum PE=4 SV=1	357.73	0	7	tr|A0A1D5VFD4|A0A1D5VFD4_WHEAT	373382	646850	346046	343888	359714	0.343406	0.21875	NA	NA	90949.5	143029	110532	100918
tr|A0A1D5YLS3|A0A1D5YLS3_WHEAT	A0A1D5YLS3	NA	Uncharacterized protein OS=Triticum aestivum PE=3 SV=1	1084.27	0	17	tr|A0A1D5YLS3|A0A1D5YLS3_WHEAT	585917	1.76877e+06	1.78242e+06	2.71586e+06	1.7756e+06	0.509291	0.115385	NA	NA	90935.3	341947	248483	496761
tr|A0A1D6BPT7|A0A1D6BPT7_WHEAT	A0A1D6BPT7	NA	Uncharacterized protein OS=Triticum aestivum PE=4 SV=1	321.01	0	6	tr|A0A1D6BPT7|A0A1D6BPT7_WHEAT	307498	411166	431269	529748	421218	0.216984	0.0625	NA	NA	90890.9	114674	115297	145574
tr|A0A1D6C431|A0A1D6C431_WHEAT	A0A1D6C431	NA	Uncharacterized protein OS=Triticum aestivum PE=4 SV=1	353.37	0	9	tr|A0A1D6C431|A0A1D6C431_WHEAT	363448	388632	771586	732294	560463	0.386285	0.0277778	NA	NA	90854.2	103970	157552	157456
tr|A0A1D5SWB9|A0A1D5SWB9_WHEAT	A0A1D5SWB9	NA	Uncharacterized protein OS=Triticum aestivum PE=4 SV=1	280.05	0	6	tr|A0A1D5SWB9|A0A1D5SWB9_WHEAT	347707	318367	214442	293189	305778	0.194854	0.142857	NA	NA	90698.4	85854.4	59672.7	85353.5
tr|A0A1D6S1W3|A0A1D6S1W3_WHEAT	A0A1D6S1W3	NA	Uncharacterized protein OS=Triticum aestivum PE=3 SV=1	545.76	0	12	tr|A0A1D6S1W3|A0A1D6S1W3_WHEAT	448612	450635	1.30251e+06	1.28518e+06	867909	0.559188	0.116667	NA	NA	90650.3	122185	239161	216669
tr|A0A1D5RXJ7|A0A1D5RXJ7_WHEAT	A0A1D5RXJ7	NA	Uncharacterized protein OS=Triticum aestivum PE=4 SV=1	345.94	0	6	tr|A0A1D5RXJ7|A0A1D5RXJ7_WHEAT	283214	335292	211992	262308	272761	0.186889	0.125	NA	NA	90457.2	105054	69386.6	86750.8
tr|A0A1D5T8P6|A0A1D5T8P6_WHEAT	A0A1D5T8P6	NA	Acyl-[acyl-carrier-protein] desaturase OS=Triticum aestivum PE=3 SV=1	93.68	0.00174216	1	tr|A0A1D5T8P6|A0A1D5T8P6_WHEAT	90384.2	40938.6	58454.6	143272	74419.4	0.539729	0.125	NA	NA	90384.2	40938.6	58454.6	143272
tr|A0A096UUF8|A0A096UUF8_WHEAT	A0A096UUF8	NA	Uncharacterized protein OS=Triticum aestivum PE=4 SV=1	73.69	0.00521105	2	tr|A0A096UUF8|A0A096UUF8_WHEAT	180548	126868	228285	148822	164685	0.257205	0	NA	NA	90274	63434.2	114143	74411
tr|A0A1D5T229|A0A1D5T229_WHEAT	A0A1D5T229	NA	Uncharacterized protein OS=Triticum aestivum PE=4 SV=1	283.27	0	5	tr|A0A1D5T229|A0A1D5T229_WHEAT	344349	317843	203241	199090	260542	0.284863	0.05	NA	NA	90196.5	77055.6	61242.5	55184.8
tr|A0A1D5XRK1|A0A1D5XRK1_WHEAT	A0A1D5XRK1	NA	Uncharacterized protein OS=Triticum aestivum PE=4 SV=1	545.36	0	7	tr|A0A1D5XRK1|A0A1D5XRK1_WHEAT	335500	477902	149085	184787	260144	0.525928	0.178571	NA	NA	89939.8	97395.8	45443.6	49525.9
tr|A0A1D5XF84|A0A1D5XF84_WHEAT	A0A1D5XF84	NA	Uncharacterized protein OS=Triticum aestivum PE=4 SV=1	99.5	0.00178891	1	tr|A0A1D5XF84|A0A1D5XF84_WHEAT	179864	277494	421435	381394	329444	0.344824	0	NA	NA	89931.9	138747	210718	190697
tr|A0A1D6DIS2|A0A1D6DIS2_WHEAT	A0A1D6DIS2	NA	Uncharacterized protein OS=Triticum aestivum PE=4 SV=1	443.64	0	4	tr|A0A1D6DIS2|A0A1D6DIS2_WHEAT	269734	291429	1.40392e+06	583456	437442	0.833152	0.0833333	NA	NA	89906.3	96782.2	429765	184612
tr|W4ZXH8|W4ZXH8_WHEAT	W4ZXH8	NA	Uncharacterized protein OS=Triticum aestivum PE=4 SV=1	498.83	0	5	tr|W4ZXH8|W4ZXH8_WHEAT	291941	297084	7.41396e+06	818536	557810	1.57849	0.1	NA	NA	89878.3	96888.8	1.74671e+06	258291
tr|A0A1D5SBF7|A0A1D5SBF7_WHEAT	A0A1D5SBF7	NA	Histone H2B OS=Triticum aestivum PE=3 SV=1	150.24	0	2	tr|A0A1D5SBF7|A0A1D5SBF7_WHEAT	179387	211541	15951.4	32789.7	106088	0.908738	0	NA	NA	89693.4	105771	7975.72	16394.9
tr|A0A1D6AKJ1|A0A1D6AKJ1_WHEAT	A0A1D6AKJ1	NA	Uncharacterized protein OS=Triticum aestivum PE=3 SV=1	170.19	0	2	tr|A0A1D6AKJ1|A0A1D6AKJ1_WHEAT	179189	279372	402049	483212	340711	0.398722	0	NA	NA	89594.6	139686	201025	241606
tr|A0A1D6ADQ0|A0A1D6ADQ0_WHEAT	A0A1D6ADQ0	NA	Uncharacterized protein OS=Triticum aestivum PE=4 SV=1	183.83	0	6	tr|A0A1D6ADQ0|A0A1D6ADQ0_WHEAT	292885	70257.3	177106	342456	234996	0.55233	0.125	NA	NA	89455.4	23403.7	42118.3	92241.8
tr|A0A1D5YIE4|A0A1D5YIE4_WHEAT	A0A1D5YIE4	NA	Uncharacterized protein OS=Triticum aestivum PE=3 SV=1	238.61	0	5	tr|A0A1D5YIE4|A0A1D5YIE4_WHEAT	279355	310481	1.63061e+06	960623	635552	0.80395	0	NA	NA	89346.8	96563	488760	309743
tr|A0A1D5SBL6|A0A1D5SBL6_WHEAT	A0A1D5SBL6	NA	Uncharacterized protein OS=Triticum aestivum PE=4 SV=1	73.21	0.00572023	2	tr|A0A1D5SBL6|A0A1D5SBL6_WHEAT	178619	252402	55554.8	29191.4	117087	0.813964	0	NA	NA	89309.5	126201	27777.4	14595.7
tr|A0A1D5WRD8|A0A1D5WRD8_WHEAT	A0A1D5WRD8	NA	Uncharacterized protein OS=Triticum aestivum PE=4 SV=1	311.99	0	9	tr|A0A1D5WRD8|A0A1D5WRD8_WHEAT	386924	278115	452132	429312	408118	0.199725	0.0681818	NA	NA	89292.4	69691.6	109562	93285.3
tr|A0A1D5XMV6|A0A1D5XMV6_WHEAT	A0A1D5XMV6	NA	Uncharacterized protein OS=Triticum aestivum PE=4 SV=1	516.81	0	8	tr|A0A1D5XMV6|A0A1D5XMV6_WHEAT	490490	459915	1.73004e+06	1.14356e+06	817023	0.632568	0.0384615	NA	NA	89164.5	117295	458922	275705
tr|A0A0C4BIM0|A0A0C4BIM0_WHEAT	A0A0C4BIM0	NA	Uncharacterized protein OS=Triticum aestivum PE=4 SV=1	437.19	0	3	tr|A0A0C4BIM0|A0A0C4BIM0_WHEAT	266984	638463	1.16681e+06	1.13872e+06	888590	0.537951	0.125	NA	NA	88994.5	212821	388936	379572
tr|A0A1D5TQ40|A0A1D5TQ40_WHEAT	A0A1D5TQ40	NA	Uncharacterized protein OS=Triticum aestivum PE=4 SV=1	494.24	0	7	tr|A0A1D5TQ40|A0A1D5TQ40_WHEAT	343669	294086	921156	500685	422177	0.553109	0.1	NA	NA	88922.2	88692.7	250475	136682
tr|A0A1D5TPT7|A0A1D5TPT7_WHEAT	A0A1D5TPT7	NA	Uncharacterized protein OS=Triticum aestivum PE=4 SV=1	71.04	0.00564103	1	tr|A0A1D5TPT7|A0A1D5TPT7_WHEAT	88920.2	12819.6	887.629	8588.52	10704.1	1.47613	0	NA	NA	88920.2	12819.6	887.629	8588.52
tr|A0A1D5VAR3|A0A1D5VAR3_WHEAT	A0A1D5VAR3	NA	Uncharacterized protein OS=Triticum aestivum PE=4 SV=1	163.54	0	2	tr|A0A1D5VAR3|A0A1D5VAR3_WHEAT	177741	80094.1	442106	511471	309924	0.682543	0.125	NA	NA	88870.5	40047.1	221053	255735
tr|A0A1D5UMY0|A0A1D5UMY0_WHEAT	A0A1D5UMY0	NA	DNA-directed RNA polymerase subunit beta OS=Triticum aestivum PE=3 SV=1	80.03	0.003245	1	tr|A0A1D5UMY0|A0A1D5UMY0_WHEAT	88691.9	78626	183402	62167.6	83658.9	0.528571	0.375	NA	NA	88691.9	78626	183402	62167.6
tr|A0A1D5Y115|A0A1D5Y115_WHEAT	A0A1D5Y115	NA	Uncharacterized protein OS=Triticum aestivum PE=4 SV=1	135.93	0	2	tr|A0A1D5Y115|A0A1D5Y115_WHEAT	177231	90023.6	3112.18	46.2599	46567.9	1.24477	0.583333	NA	NA	88615.7	45011.8	1556.09	23.13
tr|A0A1D5TI81|A0A1D5TI81_WHEAT	A0A1D5TI81	NA	Uncharacterized protein OS=Triticum aestivum PE=4 SV=1	400.64	0	10	tr|A0A1D5TI81|A0A1D5TI81_WHEAT	392499	352418	671788	442868	417683	0.307185	0.0681818	NA	NA	88429.7	71956.9	168360	108026
tr|A0A1D6CX10|A0A1D6CX10_WHEAT	A0A1D6CX10	NA	Uncharacterized protein OS=Triticum aestivum PE=4 SV=1	118.43	0.000644745	2	tr|A0A1D6CX10|A0A1D6CX10_WHEAT	264555	261869	131971	314916	263212	0.321148	0	NA	NA	88184.9	87289.8	43990.4	104972
tr|A0A1D5YTC3|A0A1D5YTC3_WHEAT	A0A1D5YTC3	NA	Uncharacterized protein OS=Triticum aestivum PE=4 SV=1	78.68	0.00321027	1	tr|A0A1D5YTC3|A0A1D5YTC3_WHEAT	88077.4	15.42	26989.5	34127.1	30558.3	0.989217	0.25	NA	NA	88077.4	15.42	26989.5	34127.1
tr|A0A1D6CE94|A0A1D6CE94_WHEAT	A0A1D6CE94	NA	Uncharacterized protein OS=Triticum aestivum PE=4 SV=1	673.57	0	14	tr|A0A1D6CE94|A0A1D6CE94_WHEAT	495567	421234	515246	667574	505407	0.196931	0.184211	NA	NA	87481.7	95217.7	105968	153929
tr|A0A1D5ZE70|A0A1D5ZE70_WHEAT	A0A1D5ZE70	NA	Uncharacterized protein OS=Triticum aestivum PE=4 SV=1	779.88	0	16	tr|A0A1D5ZE70|A0A1D5ZE70_WHEAT	441615	694671	646547	817839	670609	0.240912	0.180556	NA	NA	87466.9	141973	105812	157966
tr|A0A1D5S5Y7|A0A1D5S5Y7_WHEAT	A0A1D5S5Y7	NA	Reticulon-like protein OS=Triticum aestivum PE=4 SV=1	278.01	0	3	tr|A0A1D5S5Y7|A0A1D5S5Y7_WHEAT	281327	70878	969509	428632	354980	0.87709	0.0714286	NA	NA	87421.2	23620.9	321449	142390
tr|A9U8G4|A9U8G4_WHEAT	A9U8G4	NA	Alcohol dehydrogenase ADH1A OS=Triticum aestivum PE=2 SV=1	574.01	0	12	tr|A9U8G4|A9U8G4_WHEAT	341058	603571	401012	892346	502292	0.444518	0.160714	NA	NA	87330.2	137069	90135.2	240870
tr|A0A1D5VEZ2|A0A1D5VEZ2_WHEAT	A0A1D5VEZ2	NA	Uncharacterized protein OS=Triticum aestivum PE=4 SV=1	466.12	0	12	tr|A0A1D5VEZ2|A0A1D5VEZ2_WHEAT	374014	441942	284121	452651	407978	0.199965	0.134615	NA	NA	86993.4	82244.9	59244.2	91953
tr|A0A1D6C799|A0A1D6C799_WHEAT	A0A1D6C799	NA	Uncharacterized protein OS=Triticum aestivum PE=4 SV=1	163.67	0	2	tr|A0A1D6C799|A0A1D6C799_WHEAT	260920	310433	280163	299699	289931	0.0759844	0	NA	NA	86973.3	103478	93387.6	99899.5
tr|A0A1D6D641|A0A1D6D641_WHEAT	A0A1D6D641	NA	Uncharacterized protein OS=Triticum aestivum PE=4 SV=1	347.88	0	6	tr|A0A1D6D641|A0A1D6D641_WHEAT	327993	212480	382290	530765	355142	0.363693	0.0555556	NA	NA	86846.7	67021	116589	174264
tr|A0A1D6BTL7|A0A1D6BTL7_WHEAT	A0A1D6BTL7	NA	Uncharacterized protein OS=Triticum aestivum PE=4 SV=1	327.25	0	5	tr|A0A1D6BTL7|A0A1D6BTL7_WHEAT	260342	985313	636706	595247	615977	0.478652	0.142857	NA	NA	86751.9	293100	197868	183984
tr|A0A1D6AJT8|A0A1D6AJT8_WHEAT	A0A1D6AJT8	NA	Uncharacterized protein OS=Triticum aestivum PE=3 SV=1	348.25	0	9	tr|A0A1D6AJT8|A0A1D6AJT8_WHEAT	323884	229551	3.60208e+06	743740	533812	1.30675	0.145833	NA	NA	86671.1	74859.1	726829	168320
tr|W5ATF3|W5ATF3_WHEAT	W5ATF3	NA	Carboxypeptidase OS=Triticum aestivum PE=3 SV=1	212.13	0	2	tr|W5ATF3|W5ATF3_WHEAT	173259	330855	573782	628657	452319	0.498759	0.0833333	NA	NA	86629.6	165428	286891	314329
tr|A0A1D5XI68|A0A1D5XI68_WHEAT	A0A1D5XI68	NA	Uncharacterized protein OS=Triticum aestivum PE=4 SV=1	187.61	0	4	tr|A0A1D5XI68|A0A1D5XI68_WHEAT	270969	178475	310760	417616	290864	0.336412	0	NA	NA	86352.8	58898.7	92465.6	125400
tr|A0A077RPK9|A0A077RPK9_WHEAT	A0A077RPK9	TRAES_3BF030400020CFD_c1	Uncharacterized protein OS=Triticum aestivum GN=TRAES_3BF030400020CFD_c1 PE=4 SV=1	286.23	0	6	tr|A0A077RPK9|A0A077RPK9_WHEAT	290870	177028	63027.5	219077	198053	0.508631	0.125	NA	NA	86165.5	58993.9	16392.1	59030.5
tr|A0A1D5VU21|A0A1D5VU21_WHEAT	A0A1D5VU21	NA	DNA-directed RNA polymerase subunit OS=Triticum aestivum PE=3 SV=1	422.97	0	12	tr|A0A1D5VU21|A0A1D5VU21_WHEAT	335317	356388	504254	491843	424116	0.209588	0.145833	NA	NA	85945.3	71566	126344	122760
tr|A0A1D6BKV3|A0A1D6BKV3_WHEAT	A0A1D6BKV3	NA	Uncharacterized protein OS=Triticum aestivum PE=4 SV=1	351.39	0	5	tr|A0A1D6BKV3|A0A1D6BKV3_WHEAT	280108	665857	192883	278332	279220	0.59741	0.21875	NA	NA	85905.3	186936	64002.9	92632.9
tr|A0A1D5STP8|A0A1D5STP8_WHEAT	A0A1D5STP8	NA	Uncharacterized protein OS=Triticum aestivum PE=3 SV=1	115.42	0.00127307	2	tr|A0A1D5STP8|A0A1D5STP8_WHEAT	171189	191251	16030	17713.3	94451.1	0.961594	0	NA	NA	85594.5	95625.3	8014.98	8856.65
tr|A0A1D6RK95|A0A1D6RK95_WHEAT	A0A1D6RK95	NA	Uncharacterized protein OS=Triticum aestivum PE=3 SV=1	242.05	0	3	tr|A0A1D6RK95|A0A1D6RK95_WHEAT	256319	137766	684261	496363	376341	0.621068	0	NA	NA	85439.8	45921.8	228087	165454
tr|A0A1D5W152|A0A1D5W152_WHEAT	A0A1D5W152	NA	Uncharacterized protein OS=Triticum aestivum PE=4 SV=1	387.97	0	7	tr|A0A1D5W152|A0A1D5W152_WHEAT	296395	479108	671005	819559	575057	0.401945	0.159091	NA	NA	85291.2	115763	183987	243460
tr|A0A1D6BEG5|A0A1D6BEG5_WHEAT	A0A1D6BEG5	NA	Uncharacterized protein OS=Triticum aestivum PE=4 SV=1	241.6	0	4	tr|A0A1D6BEG5|A0A1D6BEG5_WHEAT	260513	92438.6	294790	415014	277651	0.501153	0.0833333	NA	NA	85162.9	30139.2	83370.4	124353
tr|A0A1D5T8E9|A0A1D5T8E9_WHEAT	A0A1D5T8E9	NA	Non-specific lipid-transfer protein OS=Triticum aestivum PE=3 SV=1	55.05	0.00969529	1	tr|A0A1D5T8E9|A0A1D5T8E9_WHEAT	85116.4	52679.6	436.02	15.42	26557.8	1.20946	0.25	NA	NA	85116.4	52679.6	436.02	15.42
tr|A0A1D5YN04|A0A1D5YN04_WHEAT	A0A1D5YN04	NA	Uncharacterized protein OS=Triticum aestivum PE=4 SV=1	126.71	0	4	tr|A0A1D5YN04|A0A1D5YN04_WHEAT	275683	170503	78749.8	82569	126536	0.610912	0.0625	NA	NA	85010.7	56829	22967.3	26700
tr|A0A1D5VEV5|A0A1D5VEV5_WHEAT	A0A1D5VEV5	NA	Uncharacterized protein OS=Triticum aestivum PE=4 SV=1	266.91	0	4	tr|A0A1D5VEV5|A0A1D5VEV5_WHEAT	257563	427221	3.32511e+06	1.90951e+06	1.16837e+06	0.970785	0.0416667	NA	NA	84853.4	142402	1.09806e+06	614517
tr|A0A1D6AZD6|A0A1D6AZD6_WHEAT	A0A1D6AZD6	NA	Uncharacterized protein OS=Triticum aestivum PE=4 SV=1	267.16	0	7	tr|A0A1D6AZD6|A0A1D6AZD6_WHEAT	352923	447443	190346	354492	353708	0.317776	0.0714286	NA	NA	84814.6	113980	46238	81007.1
tr|A0A1D5RSA5|A0A1D5RSA5_WHEAT	A0A1D5RSA5	NA	Uncharacterized protein OS=Triticum aestivum PE=4 SV=1	138.08	0	4	tr|A0A1D5RSA5|A0A1D5RSA5_WHEAT	263865	285839	281932	394815	283885	0.194302	0.05	NA	NA	84729.1	85786.4	91580.1	128689
tr|W5EJR8|W5EJR8_WHEAT	W5EJR8	NA	Uncharacterized protein OS=Triticum aestivum PE=3 SV=1	457.56	0	10	tr|W5EJR8|W5EJR8_WHEAT	385282	240058	517004	677747	451143	0.410213	0.0833333	NA	NA	84495.6	47998.5	105275	144743
tr|A0A1D6AH27|A0A1D6AH27_WHEAT	A0A1D6AH27	NA	Uncharacterized protein OS=Triticum aestivum PE=4 SV=1	143.72	0	2	tr|A0A1D6AH27|A0A1D6AH27_WHEAT	168076	146969	137188	123907	142078	0.12918	0.0833333	NA	NA	84038.1	73484.3	68593.8	61953.5
tr|A0A1D5U8F7|A0A1D5U8F7_WHEAT	A0A1D5U8F7	NA	Dirigent protein OS=Triticum aestivum PE=3 SV=1	177.72	0	4	tr|A0A1D5U8F7|A0A1D5U8F7_WHEAT	260029	350313	186223	319002	289515	0.259003	0.05	NA	NA	83854.6	112420	56513	104035
tr|A0A1D5Y867|A0A1D5Y867_WHEAT	A0A1D5Y867	NA	Uncharacterized protein OS=Triticum aestivum PE=4 SV=1	212.86	0	5	tr|A0A1D5Y867|A0A1D5Y867_WHEAT	263984	274652	330876	287109	280881	0.10159	0	NA	NA	83624.4	82393.7	92338.7	69723.3
tr|W5AY74|W5AY74_WHEAT	W5AY74	Clo2	Caleosin OS=Triticum aestivum GN=Clo2 PE=2 SV=1	324.56	0	5	tr|W5AY74|W5AY74_WHEAT	265358	317483	2.1841e+06	1.25376e+06	785623	0.903054	0.0625	NA	NA	83463.9	102397	625765	353718
tr|W5CCH5|W5CCH5_WHEAT	W5CCH5	NA	Uncharacterized protein OS=Triticum aestivum PE=4 SV=1	245.04	0	3	tr|W5CCH5|W5CCH5_WHEAT	279391	1.29203e+06	735338	2.02178e+06	1.01368e+06	0.693927	0.166667	NA	NA	83438.1	393517	245102	673863
tr|A0A1D5XWG6|A0A1D5XWG6_WHEAT	A0A1D5XWG6	NA	Uncharacterized protein OS=Triticum aestivum PE=4 SV=1	1248.79	0	21	tr|A0A1D5XWG6|A0A1D5XWG6_WHEAT	746498	1.2592e+06	956714	984131	970423	0.213293	0.163462	NA	NA	83307.7	186856	182105	126723
tr|A0A0C4BK49|A0A0C4BK49_WHEAT	A0A0C4BK49	NA	Proteasome subunit alpha type OS=Triticum aestivum PE=3 SV=1	493.18	0	5	tr|A0A0C4BK49|A0A0C4BK49_WHEAT	272785	322121	719346	495924	409023	0.446323	0.1	NA	NA	83304.8	107136	225673	150938
tr|A0A1D6BFM9|A0A1D6BFM9_WHEAT	A0A1D6BFM9	NA	Histone deacetylase OS=Triticum aestivum PE=3 SV=1	88.39	0.00226116	2	tr|A0A1D6BFM9|A0A1D6BFM9_WHEAT	166441	184960	89124.3	110247	138344	0.329433	0	NA	NA	83220.6	92479.8	44562.1	55123.6
tr|A0A1D5Z6Q8|A0A1D5Z6Q8_WHEAT	A0A1D5Z6Q8	NA	Uncharacterized protein OS=Triticum aestivum PE=4 SV=1	128.25	0	3	tr|A0A1D5Z6Q8|A0A1D5Z6Q8_WHEAT	248971	276268	207919	196062	228445	0.159501	0.166667	NA	NA	82990.5	92089.3	69306.3	65354.1
tr|A0A1D5XXH1|A0A1D5XXH1_WHEAT	A0A1D5XXH1	NA	Uncharacterized protein OS=Triticum aestivum PE=4 SV=1	275.75	0	5	tr|A0A1D5XXH1|A0A1D5XXH1_WHEAT	278978	602466	252998	306141	292560	0.452587	0.05	NA	NA	82789.3	151758	81151.3	97966.5
tr|A0A1D5UI26|A0A1D5UI26_WHEAT	A0A1D5UI26	NA	Uncharacterized protein OS=Triticum aestivum PE=3 SV=1	166.17	0	1	tr|A0A1D5UI26|A0A1D5UI26_WHEAT	165205	270184	113074	117613	141409	0.438515	0.166667	NA	NA	82602.7	135092	56537	58806.5
tr|A0A1D5XE80|A0A1D5XE80_WHEAT	A0A1D5XE80	NA	Uncharacterized protein OS=Triticum aestivum PE=4 SV=1	205.41	0	3	tr|A0A1D5XE80|A0A1D5XE80_WHEAT	246865	47695.3	173974	216064	195019	0.511585	0.1875	NA	NA	82288.2	15898.4	57991.5	72021.5
tr|W5F7P6|W5F7P6_WHEAT	W5F7P6	NA	Uncharacterized protein OS=Triticum aestivum PE=4 SV=1	253.57	0	4	tr|W5F7P6|W5F7P6_WHEAT	288483	294313	231793	222515	260138	0.144095	0.0625	NA	NA	82243.6	84932.7	76958.2	74166.4
tr|A0A1D6B327|A0A1D6B327_WHEAT	A0A1D6B327	NA	Eukaryotic translation initiation factor 2A OS=Triticum aestivum PE=3 SV=1	253.44	0	6	tr|A0A1D6B327|A0A1D6B327_WHEAT	277767	298685	247542	396772	288226	0.211547	0	NA	NA	82240.7	82572	64915	109309
tr|A0A1D6BPN1|A0A1D6BPN1_WHEAT	A0A1D6BPN1	NA	Uncharacterized protein OS=Triticum aestivum PE=4 SV=1	267.21	0	6	tr|A0A1D6BPN1|A0A1D6BPN1_WHEAT	261026	285066	147210	230264	245645	0.260414	0.107143	NA	NA	82169.2	85539.5	47095.8	75632.7
tr|A0A1D5V5P0|A0A1D5V5P0_WHEAT	A0A1D5V5P0	NA	Uncharacterized protein OS=Triticum aestivum PE=4 SV=1	459.21	0	8	tr|A0A1D5V5P0|A0A1D5V5P0_WHEAT	330077	397323	836119	828351	612837	0.454735	0.0555556	NA	NA	81836.8	111740	213397	237784
tr|A0A1D6A5V3|A0A1D6A5V3_WHEAT	A0A1D6A5V3	NA	Ribonucleoside-diphosphate reductase OS=Triticum aestivum PE=3 SV=1	197.53	0	4	tr|A0A1D6A5V3|A0A1D6A5V3_WHEAT	263927	285792	175372	131369	219649	0.340721	0.05	NA	NA	81728.9	89450.1	58452.1	41693
tr|A0A1D6C496|A0A1D6C496_WHEAT	A0A1D6C496	NA	Uncharacterized protein OS=Triticum aestivum PE=3 SV=1	213.85	0	5	tr|A0A1D6C496|A0A1D6C496_WHEAT	249226	298367	297829	204242	273527	0.171902	0.142857	NA	NA	81699.3	91016.4	88402	58397.3
tr|A0A1D6C4A1|A0A1D6C4A1_WHEAT	A0A1D6C4A1	THI1	Thiamine thiazole synthase, chloroplastic OS=Triticum aestivum GN=THI1 PE=3 SV=1	262.88	0	5	tr|A0A1D6C4A1|A0A1D6C4A1_WHEAT	271033	504663	125077	232839	251936	0.56432	0.1	NA	NA	81622.2	145758	35559.2	71764.4
tr|A0A1D5TC85|A0A1D5TC85_WHEAT	A0A1D5TC85	NA	Uncharacterized protein OS=Triticum aestivum PE=4 SV=1	374.21	0	7	tr|A0A1D5TC85|A0A1D5TC85_WHEAT	319336	274582	177133	179261	226922	0.298702	0.181818	NA	NA	81560.7	58942.6	46657.7	51791
tr|D9ZLW0|D9ZLW0_WHEAT	D9ZLW0	OEP16-2	Outer membrane channel protein OEP16-2 OS=Triticum aestivum GN=OEP16-2 PE=4 SV=1	254.79	0	2	tr|D9ZLW0|D9ZLW0_WHEAT	254999	286863	1.24503e+06	1.12244e+06	704651	0.728055	0.125	NA	NA	81552.2	95616	348855	374141
tr|A0A1D6BVI3|A0A1D6BVI3_WHEAT	A0A1D6BVI3	NA	Uncharacterized protein OS=Triticum aestivum PE=4 SV=1	239.86	0	5	tr|A0A1D6BVI3|A0A1D6BVI3_WHEAT	275297	96085.1	292645	276345	275821	0.395637	0.15	NA	NA	81383.3	32004.4	82651.5	79952.6
tr|A0A1D5S5S4|A0A1D5S5S4_WHEAT	A0A1D5S5S4	NA	Uncharacterized protein OS=Triticum aestivum PE=4 SV=1	56.85	0.00932836	2	tr|A0A1D5S5S4|A0A1D5S5S4_WHEAT	162725	183374	48317.2	74369.8	118547	0.562355	0	NA	NA	81362.4	91687.2	24158.6	37184.9
tr|W5CWD3|W5CWD3_WHEAT	W5CWD3	TRAES_3BF024600080CFD_c1	Uncharacterized protein OS=Triticum aestivum GN=TRAES_3BF024600080CFD_c1 PE=4 SV=1	345.18	0	5	tr|W5CWD3|W5CWD3_WHEAT	247127	363441	126376	253879	250503	0.391086	0.125	NA	NA	81202.6	98768.6	41766.4	84389.6
tr|W5HZ15|W5HZ15_WHEAT	W5HZ15	NA	Histone H2B OS=Triticum aestivum PE=3 SV=1	73.8	0.00469484	1	tr|W5HZ15|W5HZ15_WHEAT	81074	75371.6	8298.29	1232.87	41835	1.02598	0	NA	NA	81074	75371.6	8298.29	1232.87
tr|A0A1D6CVD9|A0A1D6CVD9_WHEAT	A0A1D6CVD9	NA	Uncharacterized protein OS=Triticum aestivum PE=4 SV=1	151.54	0	2	tr|A0A1D6CVD9|A0A1D6CVD9_WHEAT	242646	305389	403873	405788	354631	0.234968	0	NA	NA	80882.2	101796	134624	135263
tr|A0A0C4BKM5|A0A0C4BKM5_WHEAT	A0A0C4BKM5	NA	Histone H2A OS=Triticum aestivum PE=3 SV=1	93.88	0.0017452	2	tr|A0A0C4BKM5|A0A0C4BKM5_WHEAT	161716	174604	405809	311141	242872	0.442798	0.1875	NA	NA	80857.8	87301.9	202905	155570
tr|A0A1D6BV13|A0A1D6BV13_WHEAT	A0A1D6BV13	NA	Glucose-1-phosphate adenylyltransferase OS=Triticum aestivum PE=3 SV=1	379.59	0	7	tr|A0A1D6BV13|A0A1D6BV13_WHEAT	299667	470106	56826.2	113124	206395	0.800327	0.0714286	NA	NA	80811.6	113553	14995.1	29214.3
tr|A0A1D6BHY6|A0A1D6BHY6_WHEAT	A0A1D6BHY6	NA	Glyceraldehyde-3-phosphate dehydrogenase OS=Triticum aestivum PE=3 SV=1	76.85	0	2	tr|A0A1D6BHY6|A0A1D6BHY6_WHEAT	161622	143381	32448.3	45309.6	94345.1	0.692128	0.125	NA	NA	80811.2	71690.3	16224.1	22654.8
tr|A0A1D5T9N5|A0A1D5T9N5_WHEAT	A0A1D5T9N5	NA	Uncharacterized protein OS=Triticum aestivum PE=4 SV=1	841.84	0	13	tr|A0A1D5T9N5|A0A1D5T9N5_WHEAT	504563	574368	998429	1.26395e+06	786399	0.430426	0.105263	NA	NA	80724.4	89180.9	161917	200846
tr|A0A1D5VPN7|A0A1D5VPN7_WHEAT	A0A1D5VPN7	NA	Uncharacterized protein OS=Triticum aestivum PE=3 SV=1	329.77	0	6	tr|A0A1D5VPN7|A0A1D5VPN7_WHEAT	310558	209583	188051	304894	257239	0.250848	0.142857	NA	NA	80416	67272.1	54062.2	93429.4
tr|A0A1D6RW54|A0A1D6RW54_WHEAT	A0A1D6RW54	NA	Nuclear pore protein OS=Triticum aestivum PE=3 SV=1	336.71	0	5	tr|A0A1D6RW54|A0A1D6RW54_WHEAT	243649	272557	85898.3	100907	172278	0.546308	0	NA	NA	80126.2	79290.7	27625.8	31354.6
tr|A0A1D6ASL7|A0A1D6ASL7_WHEAT	A0A1D6ASL7	NA	Uncharacterized protein OS=Triticum aestivum PE=4 SV=1	253.89	0	5	tr|A0A1D6ASL7|A0A1D6ASL7_WHEAT	245650	1.15964e+06	1.27685e+06	1.23324e+06	1.19644e+06	0.5018	0.0714286	NA	NA	79918.7	364848	411549	386961
tr|A0A1D5TID0|A0A1D5TID0_WHEAT	A0A1D5TID0	NA	Uncharacterized protein OS=Triticum aestivum PE=4 SV=1	169.34	0	3	tr|A0A1D5TID0|A0A1D5TID0_WHEAT	239585	170575	64875	225933	198254	0.453077	0.125	NA	NA	79856.4	56849.4	21619.9	74766.5
tr|A0A1D5ZYJ7|A0A1D5ZYJ7_WHEAT	A0A1D5ZYJ7	NA	Uncharacterized protein OS=Triticum aestivum PE=4 SV=1	76.5	0.00316957	1	tr|A0A1D5ZYJ7|A0A1D5ZYJ7_WHEAT	79516.1	126816	74189.4	30.84	76852.7	0.746849	0.625	NA	NA	79516.1	126816	74189.4	30.84
tr|A0A1D5XGL9|A0A1D5XGL9_WHEAT	A0A1D5XGL9	NA	Uncharacterized protein OS=Triticum aestivum PE=4 SV=1	76.45	0.0031679	1	tr|A0A1D5XGL9|A0A1D5XGL9_WHEAT	79400.4	100008	16775.5	24358	51879.2	0.742004	0	NA	NA	79400.4	100008	16775.5	24358
tr|A0A1D6DKK3|A0A1D6DKK3_WHEAT	A0A1D6DKK3	NA	Uncharacterized protein OS=Triticum aestivum PE=4 SV=1	83.53	0.00275938	2	tr|A0A1D6DKK3|A0A1D6DKK3_WHEAT	158771	128509	109266	171095	143640	0.198532	0.125	NA	NA	79385.7	64254.7	54633	85547.6
tr|A0A1D6AT72|A0A1D6AT72_WHEAT	A0A1D6AT72	NA	Uncharacterized protein OS=Triticum aestivum PE=3 SV=1	109.9	0.00187032	3	tr|A0A1D6AT72|A0A1D6AT72_WHEAT	238135	75017.5	29110.2	41202.3	58109.9	1.0099	0.166667	NA	NA	79378.2	25005.8	9703.39	13734.1
tr|A0A1D5YR17|A0A1D5YR17_WHEAT	A0A1D5YR17	NA	Uncharacterized protein OS=Triticum aestivum PE=4 SV=1	303.71	0	7	tr|A0A1D5YR17|A0A1D5YR17_WHEAT	306832	218578	138861	165227	191902	0.357491	0.142857	NA	NA	79327.4	68988.3	38905.1	44395.6
tr|A0A1D5VE13|A0A1D5VE13_WHEAT	A0A1D5VE13	NA	Fructose-bisphosphate aldolase OS=Triticum aestivum PE=3 SV=1	598.03	0	10	tr|A0A1D5VE13|A0A1D5VE13_WHEAT	341954	405153	535701	603923	470427	0.253351	0.166667	NA	NA	79324.1	119815	134862	156676
tr|A0A1D5SCN9|A0A1D5SCN9_WHEAT	A0A1D5SCN9	NA	Glucose-1-phosphate adenylyltransferase OS=Triticum aestivum PE=3 SV=1	833.69	0	16	tr|A0A1D5SCN9|A0A1D5SCN9_WHEAT	613342	781277	478367	449622	545855	0.261091	0.131579	NA	NA	79239.5	95883.8	76047.4	86980.9
tr|A0A1D5V9E2|A0A1D5V9E2_WHEAT	A0A1D5V9E2	NA	Signal recognition particle subunit SRP72 OS=Triticum aestivum PE=3 SV=1	82.96	0.0027533	1	tr|A0A1D5V9E2|A0A1D5V9E2_WHEAT	79195.9	84825.5	66330.8	181949	82010.7	0.515635	0	NA	NA	79195.9	84825.5	66330.8	181949
tr|A0A1D5WB57|A0A1D5WB57_WHEAT	A0A1D5WB57	NA	Uncharacterized protein OS=Triticum aestivum PE=4 SV=1	370.11	0	8	tr|A0A1D5WB57|A0A1D5WB57_WHEAT	420037	341021	275509	412617	376819	0.187549	0.03125	NA	NA	79161.1	71661.6	56859.8	84657.7
tr|A0A1D5Z167|A0A1D5Z167_WHEAT	A0A1D5Z167	NA	Uncharacterized protein OS=Triticum aestivum PE=4 SV=1	292.74	0	3	tr|A0A1D5Z167|A0A1D5Z167_WHEAT	240193	214455	355821	410958	298007	0.306088	0.0833333	NA	NA	78948.4	71359.2	96549.9	135499
tr|W5B8Z5|W5B8Z5_WHEAT	W5B8Z5	NA	Uncharacterized protein OS=Triticum aestivum PE=3 SV=1	236.26	0	5	tr|W5B8Z5|W5B8Z5_WHEAT	273235	177759	769270	627969	450602	0.610075	0.0833333	NA	NA	78922.6	54470.3	255938	196772
tr|A0A1D6AB66|A0A1D6AB66_WHEAT	A0A1D6AB66	NA	Uncharacterized protein OS=Triticum aestivum PE=3 SV=1	353.6	0	9	tr|A0A1D6AB66|A0A1D6AB66_WHEAT	357680	457224	237274	295777	326728	0.279036	0.0454545	NA	NA	78903	109080	53338.6	81958.6
tr|A0A1D5W4W7|A0A1D5W4W7_WHEAT	A0A1D5W4W7	NA	Uncharacterized protein OS=Triticum aestivum PE=4 SV=1	480.76	0	7	tr|A0A1D5W4W7|A0A1D5W4W7_WHEAT	339889	198066	62839.7	61636.9	130453	0.801069	0.1875	NA	NA	78746.6	51293.5	20734.4	19799.9
tr|W5F7Z2|W5F7Z2_WHEAT	W5F7Z2	NA	Uncharacterized protein OS=Triticum aestivum PE=4 SV=1	94.12	0.00174622	3	tr|W5F7Z2|W5F7Z2_WHEAT	235945	261769	312870	363135	287319	0.192218	0.0625	NA	NA	78648.2	87256.2	104290	121045
tr|W5ATQ8|W5ATQ8_WHEAT	W5ATQ8	NA	Uncharacterized protein OS=Triticum aestivum PE=3 SV=1	680.22	0	9	tr|W5ATQ8|W5ATQ8_WHEAT	367686	1.08194e+06	900869	1.47275e+06	991406	0.480221	0.134615	NA	NA	78621.7	268879	222148	332925
tr|W5HG50|W5HG50_WHEAT	W5HG50	NA	Uncharacterized protein OS=Triticum aestivum PE=3 SV=1	388.51	0	9	tr|W5HG50|W5HG50_WHEAT	287480	411291	958403	824966	618129	0.518576	0.0625	NA	NA	78441.2	98262.7	205408	183411
tr|Q93W25|Q93W25_WHEAT	Q93W25	CyP3	Peptidyl-prolyl cis-trans isomerase OS=Triticum aestivum GN=CyP3 PE=1 SV=1	282.6	0	5	tr|Q93W25|Q93W25_WHEAT	273041	279886	219136	191135	246089	0.177865	0.0714286	NA	NA	78381.5	93275.3	71783.1	63083
tr|A0A1D5WJB3|A0A1D5WJB3_WHEAT	A0A1D5WJB3	NA	Uncharacterized protein OS=Triticum aestivum PE=4 SV=1	795.62	0	9	tr|A0A1D5WJB3|A0A1D5WJB3_WHEAT	312726	504324	379319	811921	441822	0.440788	0.25	NA	NA	78371.4	123996	96546.2	185758
tr|A0A096UU74|A0A096UU74_WHEAT	A0A096UU74	NA	Uncharacterized protein OS=Triticum aestivum PE=4 SV=1	525.31	0	9	tr|A0A096UU74|A0A096UU74_WHEAT	329068	410197	369397	389146	379271	0.0922391	0.125	NA	NA	78063.3	93052.2	103242	106930
tr|A0A1D5UZP0|A0A1D5UZP0_WHEAT	A0A1D5UZP0	NA	Uncharacterized protein OS=Triticum aestivum PE=4 SV=1	86.87	0.00224467	2	tr|A0A1D5UZP0|A0A1D5UZP0_WHEAT	155845	369417	648899	342477	355947	0.536351	0	NA	NA	77922.6	184709	324449	171238
tr|A0A1D6AYP1|A0A1D6AYP1_WHEAT	A0A1D6AYP1	NA	Uncharacterized protein OS=Triticum aestivum PE=4 SV=1	130.27	0	4	tr|A0A1D6AYP1|A0A1D6AYP1_WHEAT	247218	196493	112052	80860.7	154273	0.479853	0.0625	NA	NA	77601.4	65492.5	37330	26764.3
sp|P24064|CLPP_WHEAT	P24064	clpP	ATP-dependent Clp protease proteolytic subunit OS=Triticum aestivum GN=clpP PE=3 SV=2	120.98	0.000651466	3	sp|P24064|CLPP_WHEAT	232584	229163	100693	185247	207205	0.328447	0	NA	NA	77527.9	76387.6	33564.2	61748.9
tr|W5DT55|W5DT55_WHEAT	W5DT55	NA	Uncharacterized protein OS=Triticum aestivum PE=3 SV=1	52.88	0	2	tr|W5DT55|W5DT55_WHEAT	155001	14797	313931	520100	234466	0.865043	0	NA	NA	77500.5	7398.49	156965	260050
tr|D0PRB4|D0PRB4_WHEAT	D0PRB4	NA	Peroxiredoxin OS=Triticum aestivum PE=2 SV=1	102.04	0.00180614	2	tr|D0PRB4|D0PRB4_WHEAT	154971	134986	258486	415851	206729	0.532935	0.166667	NA	NA	77485.7	67492.8	129243	207926
tr|A0A1D5V181|A0A1D5V181_WHEAT	A0A1D5V181	NA	Uncharacterized protein OS=Triticum aestivum PE=4 SV=1	67.46	0.0060423	1	tr|A0A1D5V181|A0A1D5V181_WHEAT	77481.1	84226.7	53827.9	111907	80853.9	0.291939	0	NA	NA	77481.1	84226.7	53827.9	111907
sp|B0LXM0|METK_WHEAT	B0LXM0	SAMS	S-adenosylmethionine synthase OS=Triticum aestivum GN=SAMS PE=2 SV=1	240.57	0	5	sp|B0LXM0|METK_WHEAT	232377	185541	490010	704531	361194	0.598958	0.178571	NA	NA	77369.1	60243.5	163326	227629
tr|W5FZ59|W5FZ59_WHEAT	W5FZ59	NA	Uncharacterized protein OS=Triticum aestivum PE=3 SV=1	142.11	0	2	tr|W5FZ59|W5FZ59_WHEAT	240108	172010	368360	405238	304234	0.367826	0.0625	NA	NA	77295.7	57331.6	122612	134987
tr|A0A1D5Y262|A0A1D5Y262_WHEAT	A0A1D5Y262	NA	Uncharacterized protein OS=Triticum aestivum PE=4 SV=1	555.47	0	11	tr|A0A1D5Y262|A0A1D5Y262_WHEAT	339077	384920	666488	694315	525704	0.355198	0.134615	NA	NA	77165.9	90279.9	121092	125132
tr|A0A096UJY5|A0A096UJY5_WHEAT	A0A096UJY5	NA	Poly [ADP-ribose] polymerase OS=Triticum aestivum PE=4 SV=1	55.86	0.00928074	1	tr|A0A096UJY5|A0A096UJY5_WHEAT	77087.6	109731	45651	84734.5	80911	0.333054	0	NA	NA	77087.6	109731	45651	84734.5
tr|A0A1D6RDT7|A0A1D6RDT7_WHEAT	A0A1D6RDT7	NA	Uncharacterized protein OS=Triticum aestivum PE=4 SV=1	574.22	0	10	tr|A0A1D6RDT7|A0A1D6RDT7_WHEAT	375024	292318	244810	236001	268564	0.221778	0.208333	NA	NA	77041.5	71814.6	53981.2	65536.2
tr|A0A1D5ZUW3|A0A1D5ZUW3_WHEAT	A0A1D5ZUW3	NA	Uncharacterized protein OS=Triticum aestivum PE=4 SV=1	153.72	0	3	tr|A0A1D5ZUW3|A0A1D5ZUW3_WHEAT	230805	82914.8	153621	223511	188566	0.400907	0	NA	NA	76934.8	27638.3	51207	74503.5
tr|A0A1D5SS37|A0A1D5SS37_WHEAT	A0A1D5SS37	NA	Uncharacterized protein OS=Triticum aestivum PE=4 SV=1	433.51	0	11	tr|A0A1D5SS37|A0A1D5SS37_WHEAT	401932	396840	171857	291733	344287	0.343645	0.0681818	NA	NA	76762.7	64234.6	45282.7	67881.6
tr|A0A1D6DKT2|A0A1D6DKT2_WHEAT	A0A1D6DKT2	NA	Uncharacterized protein OS=Triticum aestivum PE=4 SV=1	224.62	0	4	tr|A0A1D6DKT2|A0A1D6DKT2_WHEAT	245102	249981	89060.9	129462	187282	0.457094	0.25	NA	NA	76731.1	83321.8	29681.8	43148.8
tr|A0A1D5RWB0|A0A1D5RWB0_WHEAT	A0A1D5RWB0	NA	Uncharacterized protein OS=Triticum aestivum PE=4 SV=1	377.34	0	10	tr|A0A1D5RWB0|A0A1D5RWB0_WHEAT	395587	506018	290283	323047	359317	0.252382	0.05	NA	NA	76626.6	90250.5	74477.5	72772.1
tr|A0A1D6AZR7|A0A1D6AZR7_WHEAT	A0A1D6AZR7	NA	Uncharacterized protein OS=Triticum aestivum PE=4 SV=1	250.6	0	6	tr|A0A1D6AZR7|A0A1D6AZR7_WHEAT	293380	395153	360831	351564	356197	0.120736	0.178571	NA	NA	76520.8	111487	102924	100725
tr|A0A1D5SVY5|A0A1D5SVY5_WHEAT	A0A1D5SVY5	NA	Uncharacterized protein OS=Triticum aestivum PE=4 SV=1	411.62	0	9	tr|A0A1D5SVY5|A0A1D5SVY5_WHEAT	302717	312746	129868	265403	284060	0.333907	0.0555556	NA	NA	76511.4	77386.5	35716.2	85552.5
tr|A0A1D6AR49|A0A1D6AR49_WHEAT	A0A1D6AR49	NA	Uncharacterized protein OS=Triticum aestivum PE=4 SV=1	111.66	0.0018797	2	tr|A0A1D6AR49|A0A1D6AR49_WHEAT	152965	107972	99497.6	89446.2	103735	0.249296	0	NA	NA	76482.5	53986.2	49748.8	44723.1
tr|A0A1D5X0P0|A0A1D5X0P0_WHEAT	A0A1D5X0P0	NA	Uncharacterized protein OS=Triticum aestivum PE=4 SV=1	278.87	0	4	tr|A0A1D5X0P0|A0A1D5X0P0_WHEAT	233462	305811	169611	181855	207658	0.278156	0.15	NA	NA	76361	101932	51041.6	52612.5
tr|A0A1D6ACS3|A0A1D6ACS3_WHEAT	A0A1D6ACS3	NA	Uncharacterized protein OS=Triticum aestivum PE=4 SV=1	166.74	0	4	tr|A0A1D6ACS3|A0A1D6ACS3_WHEAT	247561	194977	164664	289733	221269	0.247483	0.1	NA	NA	76084.4	64838	54882.8	96572.4
tr|A0A1D5ZPE2|A0A1D5ZPE2_WHEAT	A0A1D5ZPE2	NA	Uncharacterized protein OS=Triticum aestivum PE=4 SV=1	95.78	0.0017616	2	tr|A0A1D5ZPE2|A0A1D5ZPE2_WHEAT	151715	22779.4	61095.5	85048.3	73071.9	0.675657	0	NA	NA	75857.7	11389.7	30547.7	42524.1
tr|A0A1D6CNG8|A0A1D6CNG8_WHEAT	A0A1D6CNG8	NA	Transmembrane 9 superfamily member OS=Triticum aestivum PE=3 SV=1	211.32	0	4	tr|A0A1D6CNG8|A0A1D6CNG8_WHEAT	229539	275640	768152	808637	521896	0.596281	0.05	NA	NA	75785.8	91874.7	253566	268973
tr|A0A1D6ATL6|A0A1D6ATL6_WHEAT	A0A1D6ATL6	NA	Uncharacterized protein OS=Triticum aestivum PE=4 SV=1	207.36	0	5	tr|A0A1D6ATL6|A0A1D6ATL6_WHEAT	242834	231980	348690	454919	295762	0.3268	0.15	NA	NA	75761	76211.1	98134.1	122066
tr|A0A1D6BS98|A0A1D6BS98_WHEAT	A0A1D6BS98	NA	Uncharacterized protein OS=Triticum aestivum PE=4 SV=1	289.11	0	3	tr|A0A1D6BS98|A0A1D6BS98_WHEAT	227029	195962	172198	273107	211496	0.200773	0.1875	NA	NA	75676.4	65320.7	57399.3	91035.5
tr|A0A1D5YRH8|A0A1D5YRH8_WHEAT	A0A1D5YRH8	NA	Uncharacterized protein OS=Triticum aestivum PE=4 SV=1	64.02	0	1	tr|A0A1D5YRH8|A0A1D5YRH8_WHEAT	75514.4	104986	22822.9	26465.8	50990.1	0.692293	0	NA	NA	75514.4	104986	22822.9	26465.8
tr|A0A1D6CQ12|A0A1D6CQ12_WHEAT	A0A1D6CQ12	NA	Uncharacterized protein OS=Triticum aestivum PE=4 SV=1	68.71	0.00608519	2	tr|A0A1D6CQ12|A0A1D6CQ12_WHEAT	150918	362756	111538	109143	131228	0.658924	0	NA	NA	75459.1	181378	55768.8	54571.4
tr|A0A1D6DBS5|A0A1D6DBS5_WHEAT	A0A1D6DBS5	NA	Uncharacterized protein OS=Triticum aestivum PE=4 SV=1	105.26	0	1	tr|A0A1D6DBS5|A0A1D6DBS5_WHEAT	150443	200832	255507	560023	228170	0.630626	0.125	NA	NA	75221.4	100416	127754	280011
tr|A0A1D5YIQ5|A0A1D5YIQ5_WHEAT	A0A1D5YIQ5	NA	Uncharacterized protein OS=Triticum aestivum PE=3 SV=1	339.12	0	3	tr|A0A1D5YIQ5|A0A1D5YIQ5_WHEAT	246277	470846	288061	417037	352549	0.29751	0.09375	NA	NA	75216.9	154849	91725.4	136486
tr|A0A1D5X9I3|A0A1D5X9I3_WHEAT	A0A1D5X9I3	NA	Methylthioribose-1-phosphate isomerase OS=Triticum aestivum PE=3 SV=1	216.91	0	4	tr|A0A1D5X9I3|A0A1D5X9I3_WHEAT	225006	300256	47789	58109.3	141557	0.791989	0.25	NA	NA	74996.7	100080	15919.4	19314.5
tr|W5FXY6|W5FXY6_WHEAT	W5FXY6	NA	Uncharacterized protein OS=Triticum aestivum PE=4 SV=1	172.56	0	3	tr|W5FXY6|W5FXY6_WHEAT	224269	140123	139358	65663.1	139740	0.455358	0.166667	NA	NA	74756.4	46707.7	46452.5	21887.7
tr|A0A1D5Z4H3|A0A1D5Z4H3_WHEAT	A0A1D5Z4H3	NA	Lipoxygenase OS=Triticum aestivum PE=3 SV=1	135.51	0	2	tr|A0A1D5Z4H3|A0A1D5Z4H3_WHEAT	148931	636456	237141	191130	214135	0.741332	0.125	NA	NA	74465.6	318228	118570	95564.9
tr|A0A1D5T8I8|A0A1D5T8I8_WHEAT	A0A1D5T8I8	NA	Uncharacterized protein OS=Triticum aestivum PE=4 SV=1	233.4	0	5	tr|A0A1D5T8I8|A0A1D5T8I8_WHEAT	223542	309220	610582	262743	285981	0.50131	0.208333	NA	NA	74360.3	101087	132562	66356.7
tr|A0A1D5UHE2|A0A1D5UHE2_WHEAT	A0A1D5UHE2	NA	Uncharacterized protein OS=Triticum aestivum PE=4 SV=1	676.1	0	14	tr|A0A1D5UHE2|A0A1D5UHE2_WHEAT	345994	295082	548676	642061	447335	0.359224	0.1	NA	NA	74271.2	55549.1	81453.1	96992.8
tr|A0A1D5S2V8|A0A1D5S2V8_WHEAT	A0A1D5S2V8	NA	Uncharacterized protein OS=Triticum aestivum PE=4 SV=1	641.8	0	10	tr|A0A1D5S2V8|A0A1D5S2V8_WHEAT	442175	342349	406866	472709	424521	0.134614	0.115385	NA	NA	74233.8	74855.2	84581.1	82193
tr|A0A1D6BX96|A0A1D6BX96_WHEAT	A0A1D6BX96	NA	Uncharacterized protein OS=Triticum aestivum PE=4 SV=1	171.1	0	3	tr|A0A1D6BX96|A0A1D6BX96_WHEAT	222446	72791.1	45990.7	59286.2	66038.6	0.821703	0.0833333	NA	NA	74148.8	24263.7	15330.2	19762.1
tr|A0A1D5SW40|A0A1D5SW40_WHEAT	A0A1D5SW40	NA	Uncharacterized protein OS=Triticum aestivum PE=4 SV=1	151.99	0	3	tr|A0A1D5SW40|A0A1D5SW40_WHEAT	222175	153495	127028	202269	177882	0.247904	0.166667	NA	NA	74058.3	51165	42342.5	67423
tr|A0A1D5TNG6|A0A1D5TNG6_WHEAT	A0A1D5TNG6	NA	Uncharacterized protein OS=Triticum aestivum PE=4 SV=1	335.74	0	7	tr|A0A1D5TNG6|A0A1D5TNG6_WHEAT	267599	284227	82406.4	88796.2	178198	0.609198	0.107143	NA	NA	73953.4	79481.2	26193.6	25910
tr|A0A1D5VLL4|A0A1D5VLL4_WHEAT	A0A1D5VLL4	NA	Uncharacterized protein OS=Triticum aestivum PE=4 SV=1	398.33	0	8	tr|A0A1D5VLL4|A0A1D5VLL4_WHEAT	321744	360932	2.76693e+06	2.18564e+06	1.27329e+06	0.891071	0	NA	NA	73722.6	85288.5	608715	598901
tr|A0A1D5SCZ8|A0A1D5SCZ8_WHEAT	A0A1D5SCZ8	NA	Uncharacterized protein OS=Triticum aestivum PE=4 SV=1	369.06	0	8	tr|A0A1D5SCZ8|A0A1D5SCZ8_WHEAT	295141	253659	409301	505956	352221	0.311927	0.175	NA	NA	73673.5	56230.5	81737.9	120116
tr|A0A1D6AAH0|A0A1D6AAH0_WHEAT	A0A1D6AAH0	NA	Uncharacterized protein OS=Triticum aestivum PE=3 SV=1	278.1	0	6	tr|A0A1D6AAH0|A0A1D6AAH0_WHEAT	235988	176069	214757	158392	195413	0.180398	0.166667	NA	NA	73019.3	54689.3	60416.7	41935.4
tr|A0A1D5TS90|A0A1D5TS90_WHEAT	A0A1D5TS90	NA	Uncharacterized protein OS=Triticum aestivum PE=3 SV=1	194.35	0	2	tr|A0A1D5TS90|A0A1D5TS90_WHEAT	221195	361500	1.23284e+06	592812	477156	0.743326	0.0625	NA	NA	73017.7	120125	399741	197599
tr|A0A1D6BZD5|A0A1D6BZD5_WHEAT	A0A1D6BZD5	NA	Uncharacterized protein OS=Triticum aestivum PE=4 SV=1	74.78	0.00419287	2	tr|A0A1D6BZD5|A0A1D6BZD5_WHEAT	145829	304277	72904.5	211600	178714	0.535605	0	NA	NA	72914.4	152139	36452.3	105800
tr|A0A1D5VHD2|A0A1D5VHD2_WHEAT	A0A1D5VHD2	NA	Uncharacterized protein OS=Triticum aestivum PE=4 SV=1	328.12	0	7	tr|A0A1D5VHD2|A0A1D5VHD2_WHEAT	289038	254194	379525	374370	331704	0.192704	0.25	NA	NA	72833.4	78251.2	117527	118155
tr|A0A1D5W9E8|A0A1D5W9E8_WHEAT	A0A1D5W9E8	NA	Uncharacterized protein OS=Triticum aestivum PE=3 SV=1	375.4	0	8	tr|A0A1D5W9E8|A0A1D5W9E8_WHEAT	287679	125488	440141	412504	350091	0.453624	0.204545	NA	NA	72826.2	35171.2	123778	113888
tr|A0A1D5SJ34|A0A1D5SJ34_WHEAT	A0A1D5SJ34	NA	Uncharacterized protein OS=Triticum aestivum PE=4 SV=1	163.42	0	3	tr|A0A1D5SJ34|A0A1D5SJ34_WHEAT	219345	320810	125609	196596	207970	0.374373	0.0625	NA	NA	72759.3	105771	41725.2	65527
tr|A0A096USL0|A0A096USL0_WHEAT	A0A096USL0	NA	Uncharacterized protein OS=Triticum aestivum PE=3 SV=1	117.75	0.000643501	2	tr|A0A096USL0|A0A096USL0_WHEAT	145311	148123	160008	482598	154066	0.70872	0	NA	NA	72655.7	74061.7	80003.9	241299
tr|A0A1D5X4P8|A0A1D5X4P8_WHEAT	A0A1D5X4P8	NA	Uncharacterized protein OS=Triticum aestivum PE=4 SV=1	205.17	0	5	tr|A0A1D5X4P8|A0A1D5X4P8_WHEAT	270834	232238	263442	359346	267138	0.193801	0	NA	NA	72650.4	58878.6	71740.7	90249
tr|A0A1D5UIZ7|A0A1D5UIZ7_WHEAT	A0A1D5UIZ7	NA	Uncharacterized protein OS=Triticum aestivum PE=4 SV=1	249.28	0	7	tr|A0A1D5UIZ7|A0A1D5UIZ7_WHEAT	299871	197705	226348	417689	263110	0.343823	0.0357143	NA	NA	72576.6	50209.5	49676	88607.3
tr|A0A1D6ADP5|A0A1D6ADP5_WHEAT	A0A1D6ADP5	NA	Uncharacterized protein OS=Triticum aestivum PE=4 SV=1	144.36	0	3	tr|A0A1D6ADP5|A0A1D6ADP5_WHEAT	217352	236070	301079	265700	250885	0.143408	0.15	NA	NA	72450.8	78689.9	100360	88566.7
tr|W4ZR59|W4ZR59_WHEAT	W4ZR59	NA	Mitochondrial fission 1 protein OS=Triticum aestivum PE=3 SV=1	150.64	0	1	tr|W4ZR59|W4ZR59_WHEAT	144651	153828	176181	252906	165004	0.270272	0	NA	NA	72325.3	76913.9	88090.3	126453
tr|A0A1D6AYB2|A0A1D6AYB2_WHEAT	A0A1D6AYB2	NA	Uncharacterized protein OS=Triticum aestivum PE=3 SV=1	113.38	0.00189274	2	tr|A0A1D6AYB2|A0A1D6AYB2_WHEAT	144644	231461	75574.5	59110.1	110109	0.614541	0	NA	NA	72322.1	115731	37787.3	29555
tr|A0A1D5VKW1|A0A1D5VKW1_WHEAT	A0A1D5VKW1	NA	Uncharacterized protein OS=Triticum aestivum PE=4 SV=1	64.81	0.00742942	2	tr|A0A1D5VKW1|A0A1D5VKW1_WHEAT	144037	24692.5	185484	150166	147101	0.555342	0	NA	NA	72018.3	12346.2	92741.9	75083.1
tr|W5G169|W5G169_WHEAT	W5G169	NA	Uncharacterized protein OS=Triticum aestivum PE=4 SV=1	88.15	0.00225861	1	tr|W5G169|W5G169_WHEAT	71816.8	46.2599	1.33663e+06	431420	251619	1.33517	0.333333	NA	NA	71816.8	46.2599	1.33663e+06	431420
tr|A0A1D5RY00|A0A1D5RY00_WHEAT	A0A1D5RY00	NA	Iron-sulfur cluster assembly protein OS=Triticum aestivum PE=3 SV=1	200.19	0	4	tr|A0A1D5RY00|A0A1D5RY00_WHEAT	215028	252846	441109	364766	308806	0.325296	0.0833333	NA	NA	71665.7	65161.5	138526	121216
tr|A0A1D5VJQ9|A0A1D5VJQ9_WHEAT	A0A1D5VJQ9	NA	Uncharacterized protein OS=Triticum aestivum PE=3 SV=1	190.69	0	3	tr|A0A1D5VJQ9|A0A1D5VJQ9_WHEAT	214895	237486	73250.3	108096	161495	0.505306	0	NA	NA	71631.5	79161.9	24416.8	36032
tr|A0A1D6BB88|A0A1D6BB88_WHEAT	A0A1D6BB88	NA	Uncharacterized protein OS=Triticum aestivum PE=4 SV=1	301.19	0	5	tr|A0A1D6BB88|A0A1D6BB88_WHEAT	218915	223151	119170	172316	195615	0.265086	0.1	NA	NA	71596.5	74373.2	35355.6	51812.5
tr|A0A1D5YDD8|A0A1D5YDD8_WHEAT	A0A1D5YDD8	NA	Uncharacterized protein OS=Triticum aestivum PE=4 SV=1	190.25	0	3	tr|A0A1D5YDD8|A0A1D5YDD8_WHEAT	214586	141891	39937.5	78977.5	110434	0.642882	0	NA	NA	71528.8	47297	13312.5	26325.8
tr|A0A1D6B6W6|A0A1D6B6W6_WHEAT	A0A1D6B6W6	NA	Uncharacterized protein OS=Triticum aestivum PE=4 SV=1	377.78	0	8	tr|A0A1D6B6W6|A0A1D6B6W6_WHEAT	328627	273556	267635	192654	270596	0.210301	0.0277778	NA	NA	71339.3	75520.3	76158.9	55483.2
tr|A0A1D6RRC2|A0A1D6RRC2_WHEAT	A0A1D6RRC2	NA	Uncharacterized protein OS=Triticum aestivum PE=3 SV=1	202.64	0	4	tr|A0A1D6RRC2|A0A1D6RRC2_WHEAT	216530	299542	242706	254245	248476	0.136849	0	NA	NA	71301.2	98507.1	72117	84627
tr|A0A1D6CTR9|A0A1D6CTR9_WHEAT	A0A1D6CTR9	NA	Uncharacterized protein OS=Triticum aestivum PE=4 SV=1	62.33	0.00729927	2	tr|A0A1D6CTR9|A0A1D6CTR9_WHEAT	141887	142514	150134	180729	146324	0.119166	0.125	NA	NA	70943.5	71256.8	75067.2	90364.7
tr|A0A1D6DAN1|A0A1D6DAN1_WHEAT	A0A1D6DAN1	NA	Uncharacterized protein OS=Triticum aestivum PE=4 SV=1	133.61	0	3	tr|A0A1D6DAN1|A0A1D6DAN1_WHEAT	212586	191046	20582.9	7299.64	105815	1.01003	0.25	NA	NA	70856.9	62891.5	6855.84	2428.07
tr|A0A1D5TH95|A0A1D5TH95_WHEAT	A0A1D5TH95	NA	Uncharacterized protein OS=Triticum aestivum PE=3 SV=1	133.94	0	2	tr|A0A1D5TH95|A0A1D5TH95_WHEAT	141684	206223	50610.1	50963.6	96324	0.674865	0	NA	NA	70842.2	103111	25305	25481.8
tr|A0A1D6A951|A0A1D6A951_WHEAT	A0A1D6A951	NA	Uncharacterized protein OS=Triticum aestivum PE=4 SV=1	498.96	0	9	tr|A0A1D6A951|A0A1D6A951_WHEAT	349477	407578	292195	398248	373862	0.146405	0.15	NA	NA	70631.5	68253.7	64481.6	103043
tr|A0A1D5TM63|A0A1D5TM63_WHEAT	A0A1D5TM63	NA	Uncharacterized protein OS=Triticum aestivum PE=4 SV=1	224.55	0	6	tr|A0A1D5TM63|A0A1D5TM63_WHEAT	268482	417384	130803	81083.2	199643	0.6732	0	NA	NA	70371.4	103776	36095.6	23005.8
tr|A0A1D5XEW1|A0A1D5XEW1_WHEAT	A0A1D5XEW1	NA	Proteasome subunit alpha type OS=Triticum aestivum PE=3 SV=1	154.91	0	2	tr|A0A1D5XEW1|A0A1D5XEW1_WHEAT	140577	208060	194988	289906	201524	0.296123	0.0625	NA	NA	70288.3	104030	97493.9	144953
tr|A0A1D6SBW0|A0A1D6SBW0_WHEAT	A0A1D6SBW0	NA	Uncharacterized protein OS=Triticum aestivum PE=3 SV=1	123.25	0.00065703	2	tr|A0A1D6SBW0|A0A1D6SBW0_WHEAT	140497	62419.8	29978	50858.6	56639.2	0.680544	0.166667	NA	NA	70248.5	31209.9	14989	25429.3
tr|W5AMG0|W5AMG0_WHEAT	W5AMG0	NA	Peroxidase OS=Triticum aestivum PE=3 SV=1	57.71	0.008916	2	tr|W5AMG0|W5AMG0_WHEAT	140430	99049.9	160250	240442	150340	0.370866	0	NA	NA	70214.9	49524.9	80125	120221
tr|A0A1D6CZP8|A0A1D6CZP8_WHEAT	A0A1D6CZP8	NA	Uncharacterized protein OS=Triticum aestivum PE=4 SV=1	93.23	0.00173712	2	tr|A0A1D6CZP8|A0A1D6CZP8_WHEAT	140282	33652.3	411056	417406	275669	0.773798	0	NA	NA	70140.8	16826.2	205528	208703
tr|A0A1D5YJD2|A0A1D5YJD2_WHEAT	A0A1D5YJD2	NA	Uncharacterized protein OS=Triticum aestivum PE=3 SV=1	87.85	0.00225352	2	tr|A0A1D5YJD2|A0A1D5YJD2_WHEAT	140049	113227	1.19061e+06	1.16273e+06	651389	0.93062	0.166667	NA	NA	70024.3	56613.6	595305	581365
tr|A0A1D5Y749|A0A1D5Y749_WHEAT	A0A1D5Y749	NA	Uncharacterized protein OS=Triticum aestivum PE=4 SV=1	149.67	0	3	tr|A0A1D5Y749|A0A1D5Y749_WHEAT	210042	137823	61880.9	77252.5	107538	0.553389	0.166667	NA	NA	70014	45941.1	20627	25750.8
tr|A0A1D5YYQ5|A0A1D5YYQ5_WHEAT	A0A1D5YYQ5	NA	Uncharacterized protein OS=Triticum aestivum PE=4 SV=1	236.16	0	5	tr|A0A1D5YYQ5|A0A1D5YYQ5_WHEAT	232136	21083.1	330329	442417	281233	0.697544	0.1	NA	NA	69745.1	6801.6	88161.2	122245
tr|A0A1D5YI87|A0A1D5YI87_WHEAT	A0A1D5YI87	NA	UDP-glucose 6-dehydrogenase OS=Triticum aestivum PE=3 SV=1	135.49	0	2	tr|A0A1D5YI87|A0A1D5YI87_WHEAT	209055	204034	52237	168782	186408	0.461061	0	NA	NA	69685.1	68011.4	17412.3	56260.8
tr|A0A1D5XCE9|A0A1D5XCE9_WHEAT	A0A1D5XCE9	NA	Uncharacterized protein OS=Triticum aestivum PE=4 SV=1	121.86	0.000654022	5	tr|A0A1D5XCE9|A0A1D5XCE9_WHEAT	218179	337971	130715	187783	202981	0.399762	0.05	NA	NA	69328.9	105617	42942.6	61339.5
tr|A0A1D6CDL2|A0A1D6CDL2_WHEAT	A0A1D6CDL2	NA	Uncharacterized protein OS=Triticum aestivum PE=4 SV=1	225.38	0	3	tr|A0A1D6CDL2|A0A1D6CDL2_WHEAT	207422	98516.2	107652	70412.6	103084	0.493829	0.25	NA	NA	69140.6	32838.7	35884	23470.9
tr|A0A1D5RTV2|A0A1D5RTV2_WHEAT	A0A1D5RTV2	NA	Uncharacterized protein OS=Triticum aestivum PE=4 SV=1	80.56	0.00271739	1	tr|A0A1D5RTV2|A0A1D5RTV2_WHEAT	68866	100887	20945.7	19736.8	44905.8	0.750617	0	NA	NA	68866	100887	20945.7	19736.8
tr|A0A1D5ZYD7|A0A1D5ZYD7_WHEAT	A0A1D5ZYD7	NA	Uncharacterized protein OS=Triticum aestivum PE=4 SV=1	159.58	0	2	tr|A0A1D5ZYD7|A0A1D5ZYD7_WHEAT	137502	13888.6	113446	93349.6	103398	0.598245	0	NA	NA	68750.8	6944.32	56722.8	46674.8
tr|A0A1D5V5U4|A0A1D5V5U4_WHEAT	A0A1D5V5U4	NA	Uncharacterized protein OS=Triticum aestivum PE=4 SV=1	339.1	0	5	tr|A0A1D5V5U4|A0A1D5V5U4_WHEAT	271387	242013	592045	540640	406013	0.438371	0.15	NA	NA	68750.8	73822.1	184532	173312
tr|A0A1D5XS25|A0A1D5XS25_WHEAT	A0A1D5XS25	NA	Uncharacterized protein OS=Triticum aestivum PE=4 SV=1	143.91	0	3	tr|A0A1D5XS25|A0A1D5XS25_WHEAT	205993	175106	67682.7	102040	138573	0.463798	0	NA	NA	68664.2	58368.7	22560.9	34013.2
tr|A0A1D6D9X8|A0A1D6D9X8_WHEAT	A0A1D6D9X8	NA	Uncharacterized protein OS=Triticum aestivum PE=3 SV=1	700.88	0	10	tr|A0A1D6D9X8|A0A1D6D9X8_WHEAT	368125	499873	654675	827687	577274	0.337533	0.107143	NA	NA	68604	95475.9	135461	165850
tr|A0A1D5VXJ4|A0A1D5VXJ4_WHEAT	A0A1D5VXJ4	NA	Uncharacterized protein OS=Triticum aestivum PE=4 SV=1	58.89	0.00803783	1	tr|A0A1D5VXJ4|A0A1D5VXJ4_WHEAT	68602.1	50459.9	23068.9	93118	59531	0.502491	0	NA	NA	68602.1	50459.9	23068.9	93118
tr|A0A1D5SJK1|A0A1D5SJK1_WHEAT	A0A1D5SJK1	NA	Uncharacterized protein OS=Triticum aestivum PE=4 SV=1	110.54	0.00187266	2	tr|A0A1D5SJK1|A0A1D5SJK1_WHEAT	136671	35968.4	51386.3	6717.98	43677.3	0.96766	0.333333	NA	NA	68335.6	17984.2	25693.1	3358.99
tr|A0A1D6AWL8|A0A1D6AWL8_WHEAT	A0A1D6AWL8	NA	Uncharacterized protein OS=Triticum aestivum PE=3 SV=1	125.07	0	2	tr|A0A1D6AWL8|A0A1D6AWL8_WHEAT	136457	32965.6	58746.2	48277.8	53512	0.667445	0.125	NA	NA	68228.6	16482.8	29373.1	24138.9
tr|A0A1D6A9I0|A0A1D6A9I0_WHEAT	A0A1D6A9I0	NA	Uncharacterized protein OS=Triticum aestivum PE=4 SV=1	114.22	0.00189994	2	tr|A0A1D6A9I0|A0A1D6A9I0_WHEAT	136342	69806.2	53384.9	393895	103074	0.966116	0.125	NA	NA	68171.1	34903.1	26692.5	196947
tr|A0A1D5SZS1|A0A1D5SZS1_WHEAT	A0A1D5SZS1	NA	Uncharacterized protein OS=Triticum aestivum PE=4 SV=1	217.1	0	3	tr|A0A1D5SZS1|A0A1D5SZS1_WHEAT	204007	190533	345340	248219	226113	0.283461	0	NA	NA	68002.4	63510.9	115113	82739.7
tr|W5AK86|W5AK86_WHEAT	W5AK86	NA	Uncharacterized protein OS=Triticum aestivum PE=4 SV=1	209.95	0	4	tr|W5AK86|W5AK86_WHEAT	207468	318646	65695.3	72903.7	140186	0.726683	0	NA	NA	67872.3	89981.3	21382.1	22486.5
tr|A0A096ULT1|A0A096ULT1_WHEAT	A0A096ULT1	NA	Uncharacterized protein OS=Triticum aestivum PE=3 SV=1	79.86	0.00324149	3	tr|A0A096ULT1|A0A096ULT1_WHEAT	203598	240884	177681	261681	222241	0.169932	0.0833333	NA	NA	67866	80294.7	59227.1	87227
tr|A0A1D6ANV6|A0A1D6ANV6_WHEAT	A0A1D6ANV6	NA	Uncharacterized protein OS=Triticum aestivum PE=4 SV=1	62.28	0.00728863	1	tr|A0A1D6ANV6|A0A1D6ANV6_WHEAT	67756.3	70894.6	40050.3	60249.5	64002.9	0.232081	0	NA	NA	67756.3	70894.6	40050.3	60249.5
tr|A0A1D5T8M2|A0A1D5T8M2_WHEAT	A0A1D5T8M2	NA	Uncharacterized protein OS=Triticum aestivum PE=4 SV=1	122.77	0.000655738	1	tr|A0A1D5T8M2|A0A1D5T8M2_WHEAT	67745.4	42407	24576.1	36623.6	39515.3	0.424634	0.375	NA	NA	67745.4	42407	24576.1	36623.6
tr|A0A1D5XCP2|A0A1D5XCP2_WHEAT	A0A1D5XCP2	NA	Uncharacterized protein OS=Triticum aestivum PE=4 SV=1	179.79	0	2	tr|A0A1D5XCP2|A0A1D5XCP2_WHEAT	135370	119247	3283.96	7253.38	63250.2	1.06783	0.4375	NA	NA	67685.1	59623.5	1641.98	3626.69
tr|A0A1D5ZFG6|A0A1D5ZFG6_WHEAT	A0A1D5ZFG6	NA	Uncharacterized protein OS=Triticum aestivum PE=4 SV=1	252.44	0	4	tr|A0A1D5ZFG6|A0A1D5ZFG6_WHEAT	244974	221085	81478.4	91715.9	156401	0.53316	0.05	NA	NA	67649.2	62140	26897.4	30566.8
tr|A0A1D5TNM9|A0A1D5TNM9_WHEAT	A0A1D5TNM9	NA	Elongation factor 1-alpha OS=Triticum aestivum PE=3 SV=1	188.45	0	5	tr|A0A1D5TNM9|A0A1D5TNM9_WHEAT	215299	227660	327647	391825	277653	0.289613	0.05	NA	NA	67580.9	66221.3	107196	111344
tr|A0A1D6BRJ7|A0A1D6BRJ7_WHEAT	A0A1D6BRJ7	NA	Uncharacterized protein OS=Triticum aestivum PE=3 SV=1	513.59	0	9	tr|A0A1D6BRJ7|A0A1D6BRJ7_WHEAT	247362	485125	448544	673332	466834	0.376586	0.145833	NA	NA	67364	125669	105525	176200
tr|A0A1D6AHC4|A0A1D6AHC4_WHEAT	A0A1D6AHC4	NA	Uncharacterized protein OS=Triticum aestivum PE=4 SV=1	86.65	0.00224215	1	tr|A0A1D6AHC4|A0A1D6AHC4_WHEAT	67337.3	92809	13665	19845.7	43591.5	0.786761	0	NA	NA	67337.3	92809	13665	19845.7
tr|A0A1D5TD11|A0A1D5TD11_WHEAT	A0A1D5TD11	NA	Uncharacterized protein OS=Triticum aestivum PE=4 SV=1	133.71	0	3	tr|A0A1D5TD11|A0A1D5TD11_WHEAT	200792	79739.2	45846.6	41796.6	62792.9	0.809055	0.25	NA	NA	66930.8	26579.7	15282.2	13932.2
tr|A0A1D5S2F5|A0A1D5S2F5_WHEAT	A0A1D5S2F5	NA	Uncharacterized protein OS=Triticum aestivum PE=4 SV=1	316.48	0	6	tr|A0A1D5S2F5|A0A1D5S2F5_WHEAT	234789	356240	302685	296840	299763	0.166981	0.178571	NA	NA	66687.7	85715.2	78644.5	82826.5
tr|A0A1D5SWE4|A0A1D5SWE4_WHEAT	A0A1D5SWE4	NA	Uncharacterized protein OS=Triticum aestivum PE=3 SV=1	75.33	0.00367647	2	tr|A0A1D5SWE4|A0A1D5SWE4_WHEAT	132937	119080	69017	74619.4	96849.8	0.322265	0.5	NA	NA	66468.6	59540.1	34508.5	37309.7
tr|W4ZXP5|W4ZXP5_WHEAT	W4ZXP5	NA	Uncharacterized protein OS=Triticum aestivum PE=4 SV=1	430.59	0	7	tr|W4ZXP5|W4ZXP5_WHEAT	249408	370333	321636	269162	295399	0.179952	0.0833333	NA	NA	66366.5	87899.9	88823.5	65028.4
tr|A0A1D5YJW1|A0A1D5YJW1_WHEAT	A0A1D5YJW1	NA	Uncharacterized protein OS=Triticum aestivum PE=3 SV=1	123.66	0.000657462	2	tr|A0A1D5YJW1|A0A1D5YJW1_WHEAT	198686	324616	253081	363225	288848	0.25759	0	NA	NA	66228.8	108205	84360.3	121075
tr|A0A1D6AGA0|A0A1D6AGA0_WHEAT	A0A1D6AGA0	NA	Uncharacterized protein OS=Triticum aestivum PE=3 SV=1	100.87	0.00179856	2	tr|A0A1D6AGA0|A0A1D6AGA0_WHEAT	132434	139834	53558	90819	111626	0.384444	0	NA	NA	66217	69917.2	26779	45409.5
tr|A0A1D6CFG5|A0A1D6CFG5_WHEAT	A0A1D6CFG5	NA	Uncharacterized protein OS=Triticum aestivum PE=4 SV=1	332.1	0	7	tr|A0A1D6CFG5|A0A1D6CFG5_WHEAT	339765	323590	225212	270712	297151	0.180109	0.03125	NA	NA	66041.5	84306.7	59954.2	73022.6
tr|W4ZQ59|W4ZQ59_WHEAT	W4ZQ59	NA	Uncharacterized protein OS=Triticum aestivum PE=3 SV=1	767.73	0	8	tr|W4ZQ59|W4ZQ59_WHEAT	287058	3.62506e+06	2.52553e+06	2.99564e+06	2.76059e+06	0.615886	0.0576923	NA	NA	65957.1	864146	627325	791104
tr|A0A1D5Z294|A0A1D5Z294_WHEAT	A0A1D5Z294	NA	Uncharacterized protein OS=Triticum aestivum PE=4 SV=1	136.76	0	1	tr|A0A1D5Z294|A0A1D5Z294_WHEAT	65895	21122.9	136706	128316	97105.6	0.620917	0.166667	NA	NA	65895	21122.9	136706	128316
tr|A0A1D5UIK4|A0A1D5UIK4_WHEAT	A0A1D5UIK4	NA	Uncharacterized protein OS=Triticum aestivum PE=4 SV=1	606.31	0	11	tr|A0A1D5UIK4|A0A1D5UIK4_WHEAT	358386	350273	461092	465301	409739	0.154038	0.153846	NA	NA	65558	86482.9	93912.9	96753.3
tr|A0A1D5XYK6|A0A1D5XYK6_WHEAT	A0A1D5XYK6	NA	Uncharacterized protein OS=Triticum aestivum PE=3 SV=1	315.5	0	7	tr|A0A1D5XYK6|A0A1D5XYK6_WHEAT	269330	531280	275759	284523	280141	0.374824	0	NA	NA	65387.7	125105	63968.5	77617.5
tr|A0A1D6A2L5|A0A1D6A2L5_WHEAT	A0A1D6A2L5	NA	Uncharacterized protein OS=Triticum aestivum PE=4 SV=1	218.58	0	2	tr|A0A1D6A2L5|A0A1D6A2L5_WHEAT	195390	371444	406475	793198	388960	0.570444	0.25	NA	NA	65130.1	123815	135492	264399
tr|A0A077RYG6|A0A077RYG6_WHEAT	A0A077RYG6	TRAES_3BF002500010CFD_c1	Uncharacterized protein OS=Triticum aestivum GN=TRAES_3BF002500010CFD_c1 PE=4 SV=1	468.14	0	8	tr|A0A077RYG6|A0A077RYG6_WHEAT	257029	596570	214603	215001	236015	0.576435	0.227273	NA	NA	65022.4	113259	61137.4	60825.8
tr|A0A1D5UGC7|A0A1D5UGC7_WHEAT	A0A1D5UGC7	NA	Uncharacterized protein OS=Triticum aestivum PE=4 SV=1	255.68	0	5	tr|A0A1D5UGC7|A0A1D5UGC7_WHEAT	195146	164173	206118	222656	200632	0.125097	0.2	NA	NA	64952.6	53900.6	67116.8	70104.4
tr|W5I2D4|W5I2D4_WHEAT	W5I2D4	GAPC12	Glyceraldehyde-3-phosphate dehydrogenase (Fragment) OS=Triticum aestivum GN=GAPC12 PE=2 SV=1	93.82	0.00174419	1	tr|W5I2D4|W5I2D4_WHEAT	64935.7	66964.1	32535.7	21471	48735.7	0.493797	0.375	NA	NA	64935.7	66964.1	32535.7	21471
tr|A0A1D6RTC1|A0A1D6RTC1_WHEAT	A0A1D6RTC1	NA	Uncharacterized protein OS=Triticum aestivum PE=4 SV=1	221.31	0	7	tr|A0A1D6RTC1|A0A1D6RTC1_WHEAT	248727	272073	375314	199234	260400	0.270799	0.125	NA	NA	64873.9	78875.3	116255	55511
tr|A0A1D5X7T1|A0A1D5X7T1_WHEAT	A0A1D5X7T1	NA	Uncharacterized protein OS=Triticum aestivum PE=4 SV=1	84.48	0.00222717	1	tr|A0A1D5X7T1|A0A1D5X7T1_WHEAT	64843.5	49887.4	46261.7	82622.5	57365.4	0.27195	0	NA	NA	64843.5	49887.4	46261.7	82622.5
tr|W5G750|W5G750_WHEAT	W5G750	NA	Uncharacterized protein OS=Triticum aestivum PE=4 SV=1	83.91	0	2	tr|W5G750|W5G750_WHEAT	128769	136338	268720	279373	202529	0.402681	0.125	NA	NA	64384.7	68168.8	134360	139686
tr|A0A1D5UUC8|A0A1D5UUC8_WHEAT	A0A1D5UUC8	NA	Uncharacterized protein OS=Triticum aestivum PE=4 SV=1	119.29	0.000648088	2	tr|A0A1D5UUC8|A0A1D5UUC8_WHEAT	128494	231067	5197.14	41407.7	84950.7	0.99139	0	NA	NA	64246.9	115534	2598.57	20703.8
tr|A0A1D5TAZ9|A0A1D5TAZ9_WHEAT	A0A1D5TAZ9	NA	Uncharacterized protein OS=Triticum aestivum PE=4 SV=1	187.36	0	4	tr|A0A1D5TAZ9|A0A1D5TAZ9_WHEAT	202956	163280	234474	358545	218715	0.351705	0.0625	NA	NA	64201.6	54421.7	74436.3	118605
tr|A0A1D5XC60|A0A1D5XC60_WHEAT	A0A1D5XC60	NA	Uncharacterized protein OS=Triticum aestivum PE=3 SV=1	179.29	0	4	tr|A0A1D5XC60|A0A1D5XC60_WHEAT	203887	128263	78673.5	161717	144990	0.369963	0.0625	NA	NA	64087.6	42749.3	21766.8	47148.2
tr|A0A1D6D3H0|A0A1D6D3H0_WHEAT	A0A1D6D3H0	NA	Uncharacterized protein OS=Triticum aestivum PE=4 SV=1	170.74	0	5	tr|A0A1D6D3H0|A0A1D6D3H0_WHEAT	204262	172042	340450	293571	248917	0.308562	0.05	NA	NA	63994.4	50632.2	97663.7	89728.7
tr|A0A1D6S3B0|A0A1D6S3B0_WHEAT	A0A1D6S3B0	NA	Eukaryotic translation initiation factor 3 subunit E OS=Triticum aestivum PE=3 SV=1	210.87	0	4	tr|A0A1D6S3B0|A0A1D6S3B0_WHEAT	196587	166104	381465	354845	275716	0.397134	0.05	NA	NA	63889.7	55362.9	122609	106338
tr|A0A1D5T4L7|A0A1D5T4L7_WHEAT	A0A1D5T4L7	NA	Uncharacterized protein OS=Triticum aestivum PE=4 SV=1	734.23	0	15	tr|A0A1D5T4L7|A0A1D5T4L7_WHEAT	346044	488148	294881	310641	328343	0.244816	0.117647	NA	NA	63622.8	81936.4	62617.5	73454.8
tr|A0A1D5ZVV6|A0A1D5ZVV6_WHEAT	A0A1D5ZVV6	NA	Uncharacterized protein OS=Triticum aestivum PE=4 SV=1	55.79	0.00927214	2	tr|A0A1D5ZVV6|A0A1D5ZVV6_WHEAT	127188	93504.1	141216	504315	134202	0.890678	0	NA	NA	63593.8	46752	70608.2	252157
tr|A0A1D5V7I2|A0A1D5V7I2_WHEAT	A0A1D5V7I2	NA	Uncharacterized protein OS=Triticum aestivum PE=3 SV=1	185.33	0	4	tr|A0A1D5V7I2|A0A1D5V7I2_WHEAT	191528	80153	1.09046e+06	1.89529e+06	640996	1.04476	0	NA	NA	63582.7	26096.5	358885	631494
tr|A0A1D5TCQ2|A0A1D5TCQ2_WHEAT	A0A1D5TCQ2	NA	Glycosyltransferase OS=Triticum aestivum PE=3 SV=1	263.02	0	4	tr|A0A1D5TCQ2|A0A1D5TCQ2_WHEAT	189372	146000	44958.1	59344.8	102672	0.630133	0.291667	NA	NA	63025.2	48661.5	14975.8	19771.3
tr|A0A1D5X977|A0A1D5X977_WHEAT	A0A1D5X977	NA	Uncharacterized protein OS=Triticum aestivum PE=4 SV=1	248	0	4	tr|A0A1D5X977|A0A1D5X977_WHEAT	193353	197501	212592	385863	205046	0.374914	0.05	NA	NA	62984.9	65076.8	70858.8	115931
tr|A0A1D5XYT4|A0A1D5XYT4_WHEAT	A0A1D5XYT4	NA	Uncharacterized protein OS=Triticum aestivum PE=3 SV=1	39.84	0	1	tr|A0A1D5XYT4|A0A1D5XYT4_WHEAT	62977.1	91818.3	19299.1	17387.1	41138.1	0.75369	0	NA	NA	62977.1	91818.3	19299.1	17387.1
tr|A0A1D5UZ86|A0A1D5UZ86_WHEAT	A0A1D5UZ86	NA	Glycosyltransferase OS=Triticum aestivum PE=3 SV=1	90.75	0.00171527	2	tr|A0A1D5UZ86|A0A1D5UZ86_WHEAT	125886	163358	152889	186502	158124	0.159948	0	NA	NA	62943.2	81679.2	76444.7	93251
tr|A0A1D5YN54|A0A1D5YN54_WHEAT	A0A1D5YN54	NA	Uncharacterized protein OS=Triticum aestivum PE=4 SV=1	382.23	0	9	tr|A0A1D5YN54|A0A1D5YN54_WHEAT	302345	210237	576220	808160	439283	0.572508	0.1	NA	NA	62775.8	52258.1	139158	148979
tr|A0A1D5XSR2|A0A1D5XSR2_WHEAT	A0A1D5XSR2	NA	Xyloglucan endotransglucosylase/hydrolase OS=Triticum aestivum PE=3 SV=1	261.09	0	4	tr|A0A1D5XSR2|A0A1D5XSR2_WHEAT	222784	145868	310857	342180	266821	0.347741	0.125	NA	NA	62718.5	48617.4	93414.3	113555
tr|A0A1D5YHR9|A0A1D5YHR9_WHEAT	A0A1D5YHR9	NA	Uncharacterized protein OS=Triticum aestivum PE=3 SV=1	242.05	0	5	tr|A0A1D5YHR9|A0A1D5YHR9_WHEAT	243520	133878	215005	317241	229263	0.333263	0.05	NA	NA	62663.6	44403.4	64510.4	94948.8
tr|A0A1D5UHR6|A0A1D5UHR6_WHEAT	A0A1D5UHR6	NA	Uncharacterized protein OS=Triticum aestivum PE=4 SV=1	207.07	0	4	tr|A0A1D5UHR6|A0A1D5UHR6_WHEAT	187261	222965	68573	95780.4	141521	0.51032	0.125	NA	NA	62415.3	72502.9	22405.9	31921.7
tr|W5E3C7|W5E3C7_WHEAT	W5E3C7	NA	Uncharacterized protein OS=Triticum aestivum PE=4 SV=1	69.95	0	2	tr|W5E3C7|W5E3C7_WHEAT	124411	152374	45394	73646.1	99028.6	0.488521	0.25	NA	NA	62205.6	76186.9	22697	36823.1
tr|A0A1D5US46|A0A1D5US46_WHEAT	A0A1D5US46	NA	Uncharacterized protein OS=Triticum aestivum PE=3 SV=1	174.46	0	4	tr|A0A1D5US46|A0A1D5US46_WHEAT	186283	221069	251394	241950	231509	0.128157	0	NA	NA	62089.1	73586.7	83788.1	80635.8
tr|A0A1D5YCT9|A0A1D5YCT9_WHEAT	A0A1D5YCT9	NA	Uncharacterized protein OS=Triticum aestivum PE=4 SV=1	166.27	0	3	tr|A0A1D5YCT9|A0A1D5YCT9_WHEAT	186259	58492.5	159695	163615	161655	0.400658	0.0833333	NA	NA	62086.4	19497.5	53231.7	54538.3
tr|A0A1D6CA95|A0A1D6CA95_WHEAT	A0A1D6CA95	NA	Uncharacterized protein OS=Triticum aestivum PE=4 SV=1	339.76	0	7	tr|A0A1D6CA95|A0A1D6CA95_WHEAT	196029	272984	112888	224657	210343	0.333029	0.142857	NA	NA	62074	81217.1	29264.5	56353.6
tr|A0A1D5WQ85|A0A1D5WQ85_WHEAT	A0A1D5WQ85	NA	Uncharacterized protein OS=Triticum aestivum PE=4 SV=1	203.66	0	4	tr|A0A1D5WQ85|A0A1D5WQ85_WHEAT	186116	224694	192807	300177	208751	0.231334	0.15	NA	NA	62028.5	74745.2	59535.5	91072.5
tr|A0A1D6ASM7|A0A1D6ASM7_WHEAT	A0A1D6ASM7	NA	Uncharacterized protein OS=Triticum aestivum PE=4 SV=1	144.63	0	3	tr|A0A1D6ASM7|A0A1D6ASM7_WHEAT	185698	133126	228546	302984	207122	0.337717	0.0833333	NA	NA	61899.4	44375.2	76182.1	100995
tr|W5BZM2|W5BZM2_WHEAT	W5BZM2	NA	Uncharacterized protein OS=Triticum aestivum PE=4 SV=1	404.23	0	5	tr|W5BZM2|W5BZM2_WHEAT	263500	611007	175086	252761	258131	0.596808	0.15625	NA	NA	61893.3	150722	51826.5	78673.2
tr|A0A1D5VQM3|A0A1D5VQM3_WHEAT	A0A1D5VQM3	NA	Uncharacterized protein OS=Triticum aestivum PE=3 SV=1	60.45	0.00764818	3	tr|A0A1D5VQM3|A0A1D5VQM3_WHEAT	185581	218150	326379	28037.3	201865	0.650773	0.333333	NA	NA	61860.2	72716.7	108793	9345.76
tr|W5CZ22|W5CZ22_WHEAT	W5CZ22	TRAES_3BF082800060CFD_c1	Uncharacterized protein OS=Triticum aestivum GN=TRAES_3BF082800060CFD_c1 PE=4 SV=1	95.17	0.00175439	2	tr|W5CZ22|W5CZ22_WHEAT	123562	86981	78740	128627	105271	0.241884	0.375	NA	NA	61780.9	43490.5	39370	64313.3
tr|W5BE59|W5BE59_WHEAT	W5BE59	NA	Uncharacterized protein OS=Triticum aestivum PE=4 SV=1	149.2	0	2	tr|W5BE59|W5BE59_WHEAT	123478	385798	2296.09	288.895	62887.2	1.41667	0.25	NA	NA	61739.1	192899	1148.05	144.447
tr|A0A1D5UZX1|A0A1D5UZX1_WHEAT	A0A1D5UZX1	NA	Uncharacterized protein OS=Triticum aestivum PE=4 SV=1	145.47	0	4	tr|A0A1D5UZX1|A0A1D5UZX1_WHEAT	185381	163505	23228.8	39260.5	101383	0.811072	0.0625	NA	NA	61728.7	53522.8	7734.1	13081.7
tr|B6DU63|B6DU63_WHEAT	B6DU63	ZDS	Zeta-carotene desaturase OS=Triticum aestivum GN=ZDS PE=2 SV=1	268.44	0	6	tr|B6DU63|B6DU63_WHEAT	233600	240933	376004	481349	308469	0.356252	0.0416667	NA	NA	61605.1	65336.8	78956.6	100669
tr|A0A1D6S4Q3|A0A1D6S4Q3_WHEAT	A0A1D6S4Q3	NA	Uncharacterized protein OS=Triticum aestivum PE=3 SV=1	205.11	0	3	tr|A0A1D6S4Q3|A0A1D6S4Q3_WHEAT	184758	176270	528487	333857	259307	0.539925	0.15	NA	NA	61586	58756.5	176162	111286
tr|A0A1D6BLT5|A0A1D6BLT5_WHEAT	A0A1D6BLT5	NA	Uncharacterized protein OS=Triticum aestivum PE=3 SV=1	137.72	0	2	tr|A0A1D6BLT5|A0A1D6BLT5_WHEAT	122986	37107.2	15786.9	27900.8	32504	0.958172	0.25	NA	NA	61492.9	18553.6	7893.44	13950.4
tr|A0A077RXJ4|A0A077RXJ4_WHEAT	A0A077RXJ4	TRAES_3BF151200030CFD_c1	Uncharacterized protein OS=Triticum aestivum GN=TRAES_3BF151200030CFD_c1 PE=4 SV=1	62.78	0.00733496	1	tr|A0A077RXJ4|A0A077RXJ4_WHEAT	61309.5	89286.8	275.057	1007.78	31158.7	1.1744	0	NA	NA	61309.5	89286.8	275.057	1007.78
tr|W5I4R6|W5I4R6_WHEAT	W5I4R6	NA	Uncharacterized protein OS=Triticum aestivum PE=4 SV=1	537.16	0	9	tr|W5I4R6|W5I4R6_WHEAT	304741	297590	420908	645910	362824	0.389559	0.0909091	NA	NA	61249.4	70801.4	116807	163039
tr|A0A1D6A036|A0A1D6A036_WHEAT	A0A1D6A036	NA	Uncharacterized protein OS=Triticum aestivum PE=3 SV=1	251.49	0	5	tr|A0A1D6A036|A0A1D6A036_WHEAT	199175	329402	319727	348123	324565	0.226193	0.05	NA	NA	61241.9	86677.2	97510.7	115841
tr|A0A1D6D9B0|A0A1D6D9B0_WHEAT	A0A1D6D9B0	NA	Uncharacterized protein OS=Triticum aestivum PE=3 SV=1	130.27	0	2	tr|A0A1D6D9B0|A0A1D6D9B0_WHEAT	122385	232178	27949.8	72910.5	97647.9	0.771197	0.416667	NA	NA	61192.7	116089	13974.9	36455.3
tr|A0A1D5RP06|A0A1D5RP06_WHEAT	A0A1D5RP06	NA	Uncharacterized protein OS=Triticum aestivum PE=3 SV=1	125.78	0	3	tr|A0A1D5RP06|A0A1D5RP06_WHEAT	183353	116275	61070.9	65218.4	90746.9	0.535943	0.0833333	NA	NA	61117.6	38758.5	20357	21739.5
tr|A0A1D5RXL8|A0A1D5RXL8_WHEAT	A0A1D5RXL8	NA	Uncharacterized protein OS=Triticum aestivum PE=3 SV=1	192.7	0	4	tr|A0A1D5RXL8|A0A1D5RXL8_WHEAT	188033	183897	89499.9	104485	144191	0.365843	0.15	NA	NA	61056.9	61293.8	26163.9	30329.8
tr|A0A1D5W5U9|A0A1D5W5U9_WHEAT	A0A1D5W5U9	NA	Uncharacterized protein OS=Triticum aestivum PE=4 SV=1	198.25	0	3	tr|A0A1D5W5U9|A0A1D5W5U9_WHEAT	183014	260007	43237.4	84510.3	133762	0.685039	0.0833333	NA	NA	61004.5	86669.1	14412.5	28170.1
tr|A0A1D5TCR9|A0A1D5TCR9_WHEAT	A0A1D5TCR9	NA	Uncharacterized protein OS=Triticum aestivum PE=4 SV=1	258.45	0	4	tr|A0A1D5TCR9|A0A1D5TCR9_WHEAT	186689	78457.1	289480	161120	173904	0.486062	0.2	NA	NA	60642.3	26147.2	83950.7	50958.2
tr|W5G9P1|W5G9P1_WHEAT	W5G9P1	NA	Uncharacterized protein OS=Triticum aestivum PE=3 SV=1	369.75	0	6	tr|W5G9P1|W5G9P1_WHEAT	197504	300314	563610	445942	373128	0.426994	0.1875	NA	NA	60603.2	99934.6	172510	129126
tr|A0A1D6AZ24|A0A1D6AZ24_WHEAT	A0A1D6AZ24	NA	Uncharacterized protein OS=Triticum aestivum PE=4 SV=1	58.38	0.00802265	1	tr|A0A1D6AZ24|A0A1D6AZ24_WHEAT	60330.8	72943.2	3114.48	31238.8	45784.8	0.744641	0	NA	NA	60330.8	72943.2	3114.48	31238.8
tr|A0A1D5YP74|A0A1D5YP74_WHEAT	A0A1D5YP74	NA	Mg-protoporphyrin IX chelatase OS=Triticum aestivum PE=3 SV=1	63.81	0.00737463	3	tr|A0A1D5YP74|A0A1D5YP74_WHEAT	180863	101438	189992	319626	185427	0.456224	0	NA	NA	60287.7	33812.7	63330.6	106542
tr|A0A1D5RP21|A0A1D5RP21_WHEAT	A0A1D5RP21	NA	DNA-directed RNA polymerase subunit beta OS=Triticum aestivum PE=3 SV=1	203.66	0	5	tr|A0A1D5RP21|A0A1D5RP21_WHEAT	206972	321037	149182	185078	196025	0.344388	0.1	NA	NA	60282.5	104604	49489.7	61618.1
tr|W5DDR2|W5DDR2_WHEAT	W5DDR2	NA	Uncharacterized protein OS=Triticum aestivum PE=4 SV=1	170.97	0	2	tr|W5DDR2|W5DDR2_WHEAT	182295	251599	1.32144e+06	1.52915e+06	786521	0.856566	0.125	NA	NA	60238.7	83861.3	389522	509712
tr|A0A1D6C663|A0A1D6C663_WHEAT	A0A1D6C663	NA	Uncharacterized protein OS=Triticum aestivum PE=4 SV=1	88.71	0.00226886	1	tr|A0A1D6C663|A0A1D6C663_WHEAT	60023.4	53939.9	6628.87	2048.28	30284.4	0.996476	0.25	NA	NA	60023.4	53939.9	6628.87	2048.28
tr|A0A1D5RUJ2|A0A1D5RUJ2_WHEAT	A0A1D5RUJ2	NA	Uncharacterized protein OS=Triticum aestivum PE=4 SV=1	171.09	0	3	tr|A0A1D5RUJ2|A0A1D5RUJ2_WHEAT	179128	128577	82133	106476	117527	0.332946	0	NA	NA	59709.2	42859.2	27377.7	35492.2
tr|A0A096UU55|A0A096UU55_WHEAT	A0A096UU55	NA	Uncharacterized protein OS=Triticum aestivum PE=4 SV=1	151.03	0	2	tr|A0A096UU55|A0A096UU55_WHEAT	119414	42244.4	155551	187960	137482	0.495972	0	NA	NA	59706.9	21122.2	77775.5	93979.9
tr|A0A1D6CJJ3|A0A1D6CJJ3_WHEAT	A0A1D6CJJ3	NA	Uncharacterized protein OS=Triticum aestivum PE=4 SV=1	85.44	0.00223464	2	tr|A0A1D6CJJ3|A0A1D6CJJ3_WHEAT	119145	170644	4860.1	122.932	62002.8	1.15186	0.416667	NA	NA	59572.7	85322	2430.05	61.4662
tr|A0A1D5X148|A0A1D5X148_WHEAT	A0A1D5X148	NA	Uncharacterized protein OS=Triticum aestivum PE=3 SV=1	320.34	0	5	tr|A0A1D5X148|A0A1D5X148_WHEAT	199579	256730	290262	495849	273496	0.415465	0.0416667	NA	NA	59543.9	74180.7	81770.9	160133
tr|A0A1D6BT78|A0A1D6BT78_WHEAT	A0A1D6BT78	NA	Uncharacterized protein OS=Triticum aestivum PE=4 SV=1	203.78	0	6	tr|A0A1D6BT78|A0A1D6BT78_WHEAT	254036	12006.5	48378.4	81140	64759.2	1.08419	0.214286	NA	NA	59466.8	3986.73	14368.6	26839.4
tr|A0A1D5S265|A0A1D5S265_WHEAT	A0A1D5S265	NA	Uncharacterized protein OS=Triticum aestivum PE=3 SV=1	252.31	0	4	tr|A0A1D5S265|A0A1D5S265_WHEAT	197501	139300	406567	534210	302034	0.574582	0.1	NA	NA	59456.2	46428.2	115258	153638
tr|A0A1D6AMR4|A0A1D6AMR4_WHEAT	A0A1D6AMR4	NA	Uncharacterized protein OS=Triticum aestivum PE=4 SV=1	74.37	0.0041841	1	tr|A0A1D6AMR4|A0A1D6AMR4_WHEAT	59411.2	63460	22410.4	17687.1	40910.8	0.58979	0.125	NA	NA	59411.2	63460	22410.4	17687.1
tr|A0A1D5U822|A0A1D5U822_WHEAT	A0A1D5U822	NA	Uncharacterized protein OS=Triticum aestivum PE=4 SV=1	248.68	0	7	tr|A0A1D5U822|A0A1D5U822_WHEAT	209454	55269.5	200441	398410	204948	0.651727	0.0714286	NA	NA	59395.9	16897.5	47208.3	93517.3
tr|A0A1D6BTF1|A0A1D6BTF1_WHEAT	A0A1D6BTF1	NA	Uncharacterized protein OS=Triticum aestivum PE=4 SV=1	219.68	0	5	tr|A0A1D6BTF1|A0A1D6BTF1_WHEAT	181455	234289	110362	133414	157435	0.333202	0.2	NA	NA	59363.9	64937	34646.2	41053.5
tr|A0A1D5T345|A0A1D5T345_WHEAT	A0A1D5T345	NA	Uncharacterized protein OS=Triticum aestivum PE=4 SV=1	70.52	0.00562372	1	tr|A0A1D5T345|A0A1D5T345_WHEAT	59296.1	798.231	371337	222701	140999	1.02342	0	NA	NA	59296.1	798.231	371337	222701
tr|A0A0K1YXN8|A0A0K1YXN8_WHEAT	A0A0K1YXN8	NA	Non-specific serine/threonine protein kinase OS=Triticum aestivum PE=2 SV=1	363.8	0	7	tr|A0A0K1YXN8|A0A0K1YXN8_WHEAT	234741	266788	273566	453364	270177	0.322221	0.138889	NA	NA	59231.9	76994.1	72896.8	106533
tr|A0A1D6DI32|A0A1D6DI32_WHEAT	A0A1D6DI32	NA	Uncharacterized protein OS=Triticum aestivum PE=4 SV=1	61.61	0.0077332	1	tr|A0A1D6DI32|A0A1D6DI32_WHEAT	59107.1	69557.2	51040	50383.6	55073.6	0.1556	0	NA	NA	59107.1	69557.2	51040	50383.6
tr|W5G6Q9|W5G6Q9_WHEAT	W5G6Q9	NA	Uncharacterized protein OS=Triticum aestivum PE=4 SV=1	252.73	0	5	tr|W5G6Q9|W5G6Q9_WHEAT	203703	207116	304926	452343	256021	0.399735	0.0833333	NA	NA	59019.1	67786.9	77307.7	122780
tr|A0A1D5RVB3|A0A1D5RVB3_WHEAT	A0A1D5RVB3	NA	Phosphotransferase OS=Triticum aestivum PE=3 SV=1	283.88	0	7	tr|A0A1D5RVB3|A0A1D5RVB3_WHEAT	197837	185316	398288	536809	298063	0.513249	0.0714286	NA	NA	58559.8	60911.5	106441	142621
tr|A0A1D5Z867|A0A1D5Z867_WHEAT	A0A1D5Z867	NA	Uncharacterized protein OS=Triticum aestivum PE=4 SV=1	213.8	0	4	tr|A0A1D5Z867|A0A1D5Z867_WHEAT	188031	215432	159050	341558	201731	0.355695	0	NA	NA	58542.4	71319.1	50402.6	92864.3
tr|A0A1D5TIN9|A0A1D5TIN9_WHEAT	A0A1D5TIN9	NA	Uncharacterized protein OS=Triticum aestivum PE=4 SV=1	348.25	0	6	tr|A0A1D5TIN9|A0A1D5TIN9_WHEAT	184385	231170	1.38517e+06	1.49141e+06	808173	0.865112	0.1875	NA	NA	58518.4	70501.8	416959	438001
tr|A0A1D5Z9W3|A0A1D5Z9W3_WHEAT	A0A1D5Z9W3	NA	Uncharacterized protein OS=Triticum aestivum PE=4 SV=1	28.91	0	1	tr|A0A1D5Z9W3|A0A1D5Z9W3_WHEAT	58475.8	25872.2	14151.3	105280	42174	0.800666	0	NA	NA	58475.8	25872.2	14151.3	105280
tr|A0A1D5SQB9|A0A1D5SQB9_WHEAT	A0A1D5SQB9	NA	Uncharacterized protein OS=Triticum aestivum PE=4 SV=1	153.16	0	3	tr|A0A1D5SQB9|A0A1D5SQB9_WHEAT	175399	148711	129324	152114	150413	0.124812	0	NA	NA	58466.4	49570.4	43108	50704.7
tr|A0A1D5TBV5|A0A1D5TBV5_WHEAT	A0A1D5TBV5	NA	Uncharacterized protein OS=Triticum aestivum PE=4 SV=1	131.44	0	3	tr|A0A1D5TBV5|A0A1D5TBV5_WHEAT	175295	186835	91211.6	189164	181065	0.290564	0	NA	NA	58431.7	62278.5	30403.9	63054.8
tr|A0A1D6RKU9|A0A1D6RKU9_WHEAT	A0A1D6RKU9	NA	Uncharacterized protein OS=Triticum aestivum PE=4 SV=1	131.53	0	4	tr|A0A1D6RKU9|A0A1D6RKU9_WHEAT	175637	118716	306637	293288	234462	0.408745	0.0625	NA	NA	58407.4	39567	101140	95021.1
tr|A0A1D5ZQF2|A0A1D5ZQF2_WHEAT	A0A1D5ZQF2	NA	Citrate synthase OS=Triticum aestivum PE=3 SV=1	251.33	0	6	tr|A0A1D5ZQF2|A0A1D5ZQF2_WHEAT	204111	349909	71618.8	74345.5	139228	0.754213	0.178571	NA	NA	58139.3	101921	22990.6	24443.4
tr|A0A1D5XKL4|A0A1D5XKL4_WHEAT	A0A1D5XKL4	NA	Uncharacterized protein OS=Triticum aestivum PE=4 SV=1	100.24	0.00179533	3	tr|A0A1D5XKL4|A0A1D5XKL4_WHEAT	174331	303401	342554	858188	322978	0.717518	0.166667	NA	NA	58110.4	101134	114185	286063
tr|A0A1D5VA09|A0A1D5VA09_WHEAT	A0A1D5VA09	NA	Uncharacterized protein OS=Triticum aestivum PE=4 SV=1	71.37	0.00564972	1	tr|A0A1D5VA09|A0A1D5VA09_WHEAT	58080.7	8343.41	146093	94471.2	76275.9	0.757917	0	NA	NA	58080.7	8343.41	146093	94471.2
tr|A0A1D6CTL7|A0A1D6CTL7_WHEAT	A0A1D6CTL7	NA	Uncharacterized protein OS=Triticum aestivum PE=4 SV=1	330.16	0	7	tr|A0A1D6CTL7|A0A1D6CTL7_WHEAT	225392	165484	414186	265586	245489	0.39598	0.0714286	NA	NA	57908.2	43591.2	123996	82043
tr|A0A1D5YBM3|A0A1D5YBM3_WHEAT	A0A1D5YBM3	NA	Uncharacterized protein OS=Triticum aestivum PE=3 SV=1	226.47	0	6	tr|A0A1D5YBM3|A0A1D5YBM3_WHEAT	225690	190787	388902	325502	275596	0.321653	0.0357143	NA	NA	57697.3	53899.6	117397	90468.1
tr|A0A1D6BII8|A0A1D6BII8_WHEAT	A0A1D6BII8	NA	Uncharacterized protein OS=Triticum aestivum PE=4 SV=1	227.14	0	3	tr|A0A1D6BII8|A0A1D6BII8_WHEAT	172357	184320	152218	177272	174814	0.080368	0.208333	NA	NA	57452.5	61440	50739.2	59090.5
tr|A0A1D6A431|A0A1D6A431_WHEAT	A0A1D6A431	NA	Uncharacterized protein OS=Triticum aestivum PE=4 SV=1	263.97	0	7	tr|A0A1D6A431|A0A1D6A431_WHEAT	183654	267509	81965.8	94551.3	139103	0.551308	0.15625	NA	NA	57448.2	77889.2	23904	23418.6
tr|W5I3L0|W5I3L0_WHEAT	W5I3L0	NA	Uncharacterized protein OS=Triticum aestivum PE=3 SV=1	257.12	0	5	tr|W5I3L0|W5I3L0_WHEAT	219528	487480	581715	886971	534597	0.506313	0	NA	NA	57293.1	144600	152298	261408
tr|A0A1D5XQA2|A0A1D5XQA2_WHEAT	A0A1D5XQA2	NA	Uncharacterized protein OS=Triticum aestivum PE=3 SV=1	305.19	0	7	tr|A0A1D5XQA2|A0A1D5XQA2_WHEAT	197140	208403	223566	383861	215985	0.346503	0.0357143	NA	NA	57219.7	68396.6	52306.8	76933.1
tr|A0A1D6DIQ1|A0A1D6DIQ1_WHEAT	A0A1D6DIQ1	NA	Uncharacterized protein OS=Triticum aestivum PE=4 SV=1	87.28	0.00225098	4	tr|A0A1D6DIQ1|A0A1D6DIQ1_WHEAT	176996	272952	260092	394755	266522	0.324958	0	NA	NA	57105.1	82808.2	84307.7	106985
tr|A0A1D5VVE3|A0A1D5VVE3_WHEAT	A0A1D5VVE3	NA	Uncharacterized protein OS=Triticum aestivum PE=4 SV=1	57.83	0.00892857	1	tr|A0A1D5VVE3|A0A1D5VVE3_WHEAT	56990.2	81564.8	49751.2	28168.1	53370.7	0.406801	0	NA	NA	56990.2	81564.8	49751.2	28168.1
tr|A0A1D6C0M8|A0A1D6C0M8_WHEAT	A0A1D6C0M8	NA	Uncharacterized protein OS=Triticum aestivum PE=4 SV=1	139.77	0	3	tr|A0A1D6C0M8|A0A1D6C0M8_WHEAT	170529	197276	32116.4	50604.8	110567	0.740115	0	NA	NA	56843.1	65758.8	10705.5	16868.3
tr|A0A1D5WFI9|A0A1D5WFI9_WHEAT	A0A1D5WFI9	NA	Uncharacterized protein OS=Triticum aestivum PE=4 SV=1	265.08	0	6	tr|A0A1D5WFI9|A0A1D5WFI9_WHEAT	200523	164857	121737	175541	170199	0.198463	0.0833333	NA	NA	56511.9	44945.2	32065.9	40966.3
tr|A0A1D5TL34|A0A1D5TL34_WHEAT	A0A1D5TL34	NA	Uncharacterized protein OS=Triticum aestivum PE=4 SV=1	103.51	0.00182039	3	tr|A0A1D5TL34|A0A1D5TL34_WHEAT	169399	238853	133206	225403	197401	0.256917	0.1875	NA	NA	56466.4	79617.6	44402.1	75134.5
tr|W4ZS02|W4ZS02_WHEAT	W4ZS02	NA	Casein kinase II subunit beta OS=Triticum aestivum PE=3 SV=1	140.76	0	5	tr|W4ZS02|W4ZS02_WHEAT	171495	358951	425342	406832	382891	0.341081	0.05	NA	NA	56223.2	111568	136602	121765
tr|A0A1D5WYX0|A0A1D5WYX0_WHEAT	A0A1D5WYX0	NA	Uncharacterized protein OS=Triticum aestivum PE=4 SV=1	123.73	0.000657895	4	tr|A0A1D5WYX0|A0A1D5WYX0_WHEAT	168583	102012	309869	454929	239226	0.605913	0.3	NA	NA	56189.1	33999	98488.9	144097
tr|A0A1D5YY12|A0A1D5YY12_WHEAT	A0A1D5YY12	NA	Uncharacterized protein OS=Triticum aestivum PE=4 SV=1	592.68	0	12	tr|A0A1D5YY12|A0A1D5YY12_WHEAT	195148	120826	1.65387e+06	1.1682e+06	681674	0.956952	0.1	NA	NA	56086.7	36849.7	351572	185399
tr|A0A1D6D2U8|A0A1D6D2U8_WHEAT	A0A1D6D2U8	NA	Uncharacterized protein OS=Triticum aestivum PE=4 SV=1	81.7	0.00273224	3	tr|A0A1D6D2U8|A0A1D6D2U8_WHEAT	168175	157447	393980	295572	231873	0.44352	0	NA	NA	56058.2	52482.4	131327	98524
tr|A0A1D5RSE7|A0A1D5RSE7_WHEAT	A0A1D5RSE7	NA	Cation-transporting ATPase OS=Triticum aestivum PE=3 SV=1	420.96	0	10	tr|A0A1D5RSE7|A0A1D5RSE7_WHEAT	305793	246156	486165	463895	384844	0.313784	0.15	NA	NA	55996.6	60636.7	88217.3	87330.9
tr|A0A1D5YBH6|A0A1D5YBH6_WHEAT	A0A1D5YBH6	NA	Peroxidase OS=Triticum aestivum PE=3 SV=1	221.84	0	4	tr|A0A1D5YBH6|A0A1D5YBH6_WHEAT	171579	71237.4	166328	348294	168954	0.610246	0.0625	NA	NA	55864.4	23533.9	55437.7	116006
tr|A0A1D6BIM6|A0A1D6BIM6_WHEAT	A0A1D6BIM6	NA	Uncharacterized protein OS=Triticum aestivum PE=3 SV=1	55.24	0.00925069	1	tr|A0A1D6BIM6|A0A1D6BIM6_WHEAT	55828.9	18691.4	18312.2	35924	27307.7	0.552117	0	NA	NA	55828.9	18691.4	18312.2	35924
tr|Q58A30|Q58A30_WHEAT	Q58A30	CYP71C6v3	p450 OS=Triticum aestivum GN=CYP71C6v3 PE=2 SV=1	614.3	0	12	tr|Q58A30|Q58A30_WHEAT	250814	408367	512411	698700	460389	0.401863	0.140625	NA	NA	55772.1	63661	110379	182630
tr|A0A1D5XKP4|A0A1D5XKP4_WHEAT	A0A1D5XKP4	NA	Uncharacterized protein OS=Triticum aestivum PE=4 SV=1	308.74	0	6	tr|A0A1D5XKP4|A0A1D5XKP4_WHEAT	185397	278622	416647	345219	311921	0.321223	0.03125	NA	NA	55739.8	64939.2	103777	89865.7
tr|A0A1D5WXG5|A0A1D5WXG5_WHEAT	A0A1D5WXG5	NA	Uncharacterized protein OS=Triticum aestivum PE=4 SV=1	301.66	0	8	tr|A0A1D5WXG5|A0A1D5WXG5_WHEAT	238016	332480	562661	444973	388727	0.355933	0.175	NA	NA	55614.4	76893	147865	107055
tr|A0A1D6S7W8|A0A1D6S7W8_WHEAT	A0A1D6S7W8	NA	Uncharacterized protein OS=Triticum aestivum PE=4 SV=1	213.45	0	5	tr|A0A1D6S7W8|A0A1D6S7W8_WHEAT	181143	143003	191303	209335	186223	0.154552	0.1	NA	NA	55460.7	42183.7	51736.8	59778.5
tr|A0A1D6BI29|A0A1D6BI29_WHEAT	A0A1D6BI29	NA	Succinate dehydrogenase [ubiquinone] iron-sulfur subunit, mitochondrial OS=Triticum aestivum PE=3 SV=1	463.49	0	12	tr|A0A1D6BI29|A0A1D6BI29_WHEAT	325567	496741	767329	1.652e+06	632035	0.727781	0.0714286	NA	NA	55378.1	100071	173589	434847
tr|A0A1D5VTI5|A0A1D5VTI5_WHEAT	A0A1D5VTI5	NA	Uncharacterized protein OS=Triticum aestivum PE=4 SV=1	299.89	0	3	tr|A0A1D5VTI5|A0A1D5VTI5_WHEAT	168893	260802	600556	431295	346048	0.522145	0.125	NA	NA	55371.9	86928.7	193065	142867
tr|A0A1D5XME6|A0A1D5XME6_WHEAT	A0A1D5XME6	NA	Uncharacterized protein OS=Triticum aestivum PE=4 SV=1	314.04	0	4	tr|A0A1D5XME6|A0A1D5XME6_WHEAT	192594	201775	296162	372958	248968	0.321086	0.0357143	NA	NA	55257.2	55854.1	90283.1	115151
tr|A0A1D5V5L6|A0A1D5V5L6_WHEAT	A0A1D5V5L6	NA	Uncharacterized protein OS=Triticum aestivum PE=3 SV=1	59.15	0.00805687	1	tr|A0A1D5V5L6|A0A1D5V5L6_WHEAT	55230.5	15.42	84295.4	97987.9	69763	0.730989	0.25	NA	NA	55230.5	15.42	84295.4	97987.9
tr|A0A1D5VBX7|A0A1D5VBX7_WHEAT	A0A1D5VBX7	NA	Uncharacterized protein OS=Triticum aestivum PE=4 SV=1	164.02	0	2	tr|A0A1D5VBX7|A0A1D5VBX7_WHEAT	110410	114481	140887	111455	112968	0.12144	0.125	NA	NA	55205	57240.7	70443.5	55727.7
tr|A0A1D6ALF7|A0A1D6ALF7_WHEAT	A0A1D6ALF7	PFP-ALPHA	Pyrophosphate--fructose 6-phosphate 1-phosphotransferase subunit alpha OS=Triticum aestivum GN=PFP-ALPHA PE=3 SV=1	172.45	0	4	tr|A0A1D6ALF7|A0A1D6ALF7_WHEAT	165475	11223.6	151470	246460	158472	0.680189	0.25	NA	NA	55153.1	3736.07	50484.9	82122.1
tr|A0A1D5T9I3|A0A1D5T9I3_WHEAT	A0A1D5T9I3	NA	Uncharacterized protein OS=Triticum aestivum PE=3 SV=1	74.75	0.00419068	1	tr|A0A1D5T9I3|A0A1D5T9I3_WHEAT	54955.8	60291.9	130705	126411	93351.5	0.440958	0	NA	NA	54955.8	60291.9	130705	126411
tr|W5E0R4|W5E0R4_WHEAT	W5E0R4	NA	Histone H2B OS=Triticum aestivum PE=3 SV=1	197.52	0	2	tr|W5E0R4|W5E0R4_WHEAT	109896	104972	269773	145606	127751	0.488491	0.2	NA	NA	54948.1	52485.8	134886	72803
tr|A0A1D6BHW3|A0A1D6BHW3_WHEAT	A0A1D6BHW3	NA	Uncharacterized protein OS=Triticum aestivum PE=3 SV=1	253.46	0	4	tr|A0A1D6BHW3|A0A1D6BHW3_WHEAT	165381	134407	190811	169673	167527	0.140957	0.1	NA	NA	54905	44649.5	62793.3	56541.3
tr|W5GD60|W5GD60_WHEAT	W5GD60	NA	Uncharacterized protein OS=Triticum aestivum PE=3 SV=1	72.46	0.00570835	1	tr|W5GD60|W5GD60_WHEAT	54717.3	15.42	581.954	2092.07	1337.01	1.87606	0.25	NA	NA	54717.3	15.42	581.954	2092.07
tr|A0A1D5X5C6|A0A1D5X5C6_WHEAT	A0A1D5X5C6	NA	Uncharacterized protein OS=Triticum aestivum PE=3 SV=1	170.02	0	2	tr|A0A1D5X5C6|A0A1D5X5C6_WHEAT	109309	68581.2	338466	448923	223888	0.755815	0	NA	NA	54654.6	34290.6	169233	224461
tr|A0A1D6RS66|A0A1D6RS66_WHEAT	A0A1D6RS66	NA	Uncharacterized protein OS=Triticum aestivum PE=4 SV=1	133.58	0	2	tr|A0A1D6RS66|A0A1D6RS66_WHEAT	108693	68828.7	38169.8	51982.1	60405.4	0.456396	0	NA	NA	54346.3	34414.4	19084.9	25991.1
tr|A0A1D5V7E6|A0A1D5V7E6_WHEAT	A0A1D5V7E6	NA	Uncharacterized protein OS=Triticum aestivum PE=4 SV=1	578.35	0	8	tr|A0A1D5V7E6|A0A1D5V7E6_WHEAT	250518	298568	302070	328503	300319	0.110115	0.166667	NA	NA	54325.1	75842.2	64560.2	85743.1
tr|Q0WZC2|Q0WZC2_WHEAT	Q0WZC2	NA	RNA ligase isoform 1 OS=Triticum aestivum PE=2 SV=1	173.09	0	3	tr|Q0WZC2|Q0WZC2_WHEAT	162701	133742	11617.2	80325.8	107034	0.68406	0.166667	NA	NA	54233.6	44580.8	3872.41	26775.3
tr|A0A1D5TPD4|A0A1D5TPD4_WHEAT	A0A1D5TPD4	NA	Uncharacterized protein OS=Triticum aestivum PE=4 SV=1	303	0	7	tr|A0A1D5TPD4|A0A1D5TPD4_WHEAT	219393	185385	123540	161453	173419	0.233984	0.0714286	NA	NA	54087	61256.9	30419.9	43397.7
tr|A0A1D6DFT1|A0A1D6DFT1_WHEAT	A0A1D6DFT1	NA	Uncharacterized protein OS=Triticum aestivum PE=4 SV=1	237.39	0	6	tr|A0A1D6DFT1|A0A1D6DFT1_WHEAT	229538	221511	317100	370442	273319	0.25201	0.125	NA	NA	53996.7	72432	104691	119168
tr|A0A1D6AKG6|A0A1D6AKG6_WHEAT	A0A1D6AKG6	NA	Uncharacterized protein OS=Triticum aestivum PE=4 SV=1	57.84	0.00893277	1	tr|A0A1D6AKG6|A0A1D6AKG6_WHEAT	53987.5	44396.3	17981.2	50014.3	47205.3	0.390114	0	NA	NA	53987.5	44396.3	17981.2	50014.3
tr|W5ADS2|W5ADS2_WHEAT	W5ADS2	NA	Uncharacterized protein OS=Triticum aestivum PE=4 SV=1	89.81	0.0017094	1	tr|W5ADS2|W5ADS2_WHEAT	107957	66905.5	301581	536697	204769	0.848348	0.125	NA	NA	53978.3	33452.7	150791	268348
tr|A0A1D5UDS7|A0A1D5UDS7_WHEAT	A0A1D5UDS7	NA	Uncharacterized protein OS=Triticum aestivum PE=4 SV=1	342.89	0	7	tr|A0A1D5UDS7|A0A1D5UDS7_WHEAT	200044	276234	387568	418039	331901	0.314532	0.0625	NA	NA	53922.1	69534.4	104464	97331
tr|A0A1D5UPA8|A0A1D5UPA8_WHEAT	A0A1D5UPA8	NA	Cysteine proteinase inhibitor OS=Triticum aestivum PE=3 SV=1	79.83	0.00323799	2	tr|A0A1D5UPA8|A0A1D5UPA8_WHEAT	107555	35477.9	161094	228894	134325	0.614912	0	NA	NA	53777.7	17739	80546.9	114447
tr|A0A1D6SDR4|A0A1D6SDR4_WHEAT	A0A1D6SDR4	NA	NADH dehydrogenase [ubiquinone] iron-sulfur protein 6, mitochondrial OS=Triticum aestivum PE=3 SV=1	107.49	0.00184957	2	tr|A0A1D6SDR4|A0A1D6SDR4_WHEAT	107432	134185	906620	711929	423057	0.87197	0.0833333	NA	NA	53715.9	67092.4	453310	355965
tr|A0A1D5TMY2|A0A1D5TMY2_WHEAT	A0A1D5TMY2	NA	Pectin acetylesterase OS=Triticum aestivum PE=3 SV=1	310.09	0	5	tr|A0A1D5TMY2|A0A1D5TMY2_WHEAT	177126	222661	145080	192396	184761	0.175156	0.125	NA	NA	53466.2	74205	40992.3	58507.4
tr|A0A1D6C365|A0A1D6C365_WHEAT	A0A1D6C365	NA	Uncharacterized protein OS=Triticum aestivum PE=4 SV=1	170.81	0	4	tr|A0A1D6C365|A0A1D6C365_WHEAT	159960	280404	86537.8	154987	157474	0.472698	0.0625	NA	NA	53315	79589.3	28799.2	51654.5
tr|A0A1D6AWG4|A0A1D6AWG4_WHEAT	A0A1D6AWG4	NA	Histone H2B OS=Triticum aestivum PE=3 SV=1	81.63	0.00273075	1	tr|A0A1D6AWG4|A0A1D6AWG4_WHEAT	53295.9	41416	138417	157097	95856.5	0.601364	0.125	NA	NA	53295.9	41416	138417	157097
tr|A0A1D5UBW7|A0A1D5UBW7_WHEAT	A0A1D5UBW7	NA	tRNA-dihydrouridine(47) synthase [NAD(P)(+)] OS=Triticum aestivum PE=3 SV=1	320.86	0	8	tr|A0A1D5UBW7|A0A1D5UBW7_WHEAT	224050	215288	151438	194126	204707	0.16508	0.25	NA	NA	53278.6	47030.9	41466.6	52358.2
tr|A0A1D5SQD5|A0A1D5SQD5_WHEAT	A0A1D5SQD5	NA	Uncharacterized protein OS=Triticum aestivum PE=4 SV=1	451.26	0	11	tr|A0A1D5SQD5|A0A1D5SQD5_WHEAT	274388	324084	167098	251542	262965	0.257735	0.0681818	NA	NA	53269	52350.5	43904.3	64769.4
tr|A0A1D5TCS7|A0A1D5TCS7_WHEAT	A0A1D5TCS7	NA	Glutathione peroxidase OS=Triticum aestivum PE=3 SV=1	70.63	0	1	tr|A0A1D5TCS7|A0A1D5TCS7_WHEAT	53255	3561.37	24922	29974.6	27448.3	0.730425	0	NA	NA	53255	3561.37	24922	29974.6
tr|A0A1D5TS09|A0A1D5TS09_WHEAT	A0A1D5TS09	NA	Uncharacterized protein OS=Triticum aestivum PE=4 SV=1	202.31	0	4	tr|A0A1D5TS09|A0A1D5TS09_WHEAT	169656	334307	11860.8	11921.8	90789.1	1.16764	0.125	NA	NA	53216.4	100257	3948.45	3968.79
tr|A0A1D5XHY7|A0A1D5XHY7_WHEAT	A0A1D5XHY7	NA	Uncharacterized protein OS=Triticum aestivum PE=4 SV=1	592.46	0	12	tr|A0A1D5XHY7|A0A1D5XHY7_WHEAT	281048	307273	670194	678000	488733	0.453683	0.160714	NA	NA	53170.6	64485.2	115079	126930
tr|A0A1D5X2U1|A0A1D5X2U1_WHEAT	A0A1D5X2U1	NA	Uncharacterized protein OS=Triticum aestivum PE=3 SV=1	96.42	0.00176887	2	tr|A0A1D5X2U1|A0A1D5X2U1_WHEAT	106265	62581.2	88300.4	113736	97282.7	0.245387	0	NA	NA	53132.5	31290.6	44150.2	56868
tr|A0A1D5YGS5|A0A1D5YGS5_WHEAT	A0A1D5YGS5	NA	Uncharacterized protein OS=Triticum aestivum PE=4 SV=1	398.7	0	6	tr|A0A1D5YGS5|A0A1D5YGS5_WHEAT	193565	311961	636359	583864	447912	0.493658	0.25	NA	NA	53019.3	95451	160508	162710
tr|A0A1D6CAD8|A0A1D6CAD8_WHEAT	A0A1D6CAD8	NA	Uncharacterized protein OS=Triticum aestivum PE=4 SV=1	301.55	0	5	tr|A0A1D6CAD8|A0A1D6CAD8_WHEAT	175572	140836	214375	179841	177706	0.169274	0.291667	NA	NA	53005.3	46935.2	69257.5	59623.3
tr|W4ZLQ8|W4ZLQ8_WHEAT	W4ZLQ8	NA	Uncharacterized protein OS=Triticum aestivum PE=4 SV=1	283.33	0	5	tr|W4ZLQ8|W4ZLQ8_WHEAT	227808	124385	151031	305199	189420	0.403368	0.166667	NA	NA	52858.2	38604.8	49353.2	92706.6
tr|A0A1D5XCS5|A0A1D5XCS5_WHEAT	A0A1D5XCS5	NA	Uncharacterized protein OS=Triticum aestivum PE=3 SV=1	57.64	0.00890764	2	tr|A0A1D5XCS5|A0A1D5XCS5_WHEAT	105611	111774	213137	182061	146918	0.345649	0	NA	NA	52805.6	55886.9	106569	91030.6
tr|A0A1D5ZX94|A0A1D5ZX94_WHEAT	A0A1D5ZX94	NA	Uncharacterized protein OS=Triticum aestivum PE=4 SV=1	255.3	0	6	tr|A0A1D5ZX94|A0A1D5ZX94_WHEAT	187542	88687.1	127878	194207	157710	0.33675	0.166667	NA	NA	52618.5	25742	35496.5	62440.5
tr|A0A1D5XI49|A0A1D5XI49_WHEAT	A0A1D5XI49	NA	Uncharacterized protein OS=Triticum aestivum PE=4 SV=1	470.09	0	10	tr|A0A1D5XI49|A0A1D5XI49_WHEAT	317264	194262	603710	544304	430784	0.462813	0.113636	NA	NA	52618.3	39503.2	113035	103002
tr|A0A1D6CFD2|A0A1D6CFD2_WHEAT	A0A1D6CFD2	NA	Uncharacterized protein OS=Triticum aestivum PE=4 SV=1	73.77	0.00469239	2	tr|A0A1D6CFD2|A0A1D6CFD2_WHEAT	105056	26479	17030.8	27727.9	27103.5	0.928778	0.25	NA	NA	52527.8	13239.5	8515.39	13864
tr|A0A1D5WXD0|A0A1D5WXD0_WHEAT	A0A1D5WXD0	NA	Uncharacterized protein OS=Triticum aestivum PE=4 SV=1	57.49	0.00888681	1	tr|A0A1D5WXD0|A0A1D5WXD0_WHEAT	52524.1	70919.7	105167	89685.4	80302.6	0.286922	0	NA	NA	52524.1	70919.7	105167	89685.4
tr|A0A1D5XW37|A0A1D5XW37_WHEAT	A0A1D5XW37	NA	Uncharacterized protein OS=Triticum aestivum PE=4 SV=1	323.05	0	6	tr|A0A1D5XW37|A0A1D5XW37_WHEAT	179867	326562	310712	242319	276515	0.254592	0.208333	NA	NA	52422.1	103726	85333.1	57670.5
tr|A0A1D5TEL2|A0A1D5TEL2_WHEAT	A0A1D5TEL2	NA	Uncharacterized protein OS=Triticum aestivum PE=4 SV=1	231.21	0	5	tr|A0A1D5TEL2|A0A1D5TEL2_WHEAT	182468	413649	188806	177817	185637	0.479454	0.05	NA	NA	52402.5	125758	61575.3	56936.2
tr|A0A1D5YRE2|A0A1D5YRE2_WHEAT	A0A1D5YRE2	NA	Uncharacterized protein OS=Triticum aestivum PE=3 SV=1	143.53	0	3	tr|A0A1D5YRE2|A0A1D5YRE2_WHEAT	156467	158682	80607	80969.5	118718	0.372056	0.0833333	NA	NA	52155.7	52894.1	26869	26989.8
tr|A0A1D6A2D0|A0A1D6A2D0_WHEAT	A0A1D6A2D0	NA	Uncharacterized protein OS=Triticum aestivum PE=4 SV=1	215.85	0	4	tr|A0A1D6A2D0|A0A1D6A2D0_WHEAT	157825	82488.5	147458	197201	152642	0.325479	0	NA	NA	52140.3	27144.7	47753.9	65343.6
tr|A0A1D5XXA6|A0A1D5XXA6_WHEAT	A0A1D5XXA6	NA	40S ribosomal protein S3a OS=Triticum aestivum PE=3 SV=1	88.74	0.00227015	1	tr|A0A1D5XXA6|A0A1D5XXA6_WHEAT	104133	23984.3	343705	566595	223919	0.946176	0.125	NA	NA	52066.7	11992.1	171852	283298
tr|A0A1D5T1K1|A0A1D5T1K1_WHEAT	A0A1D5T1K1	NA	Uncharacterized protein OS=Triticum aestivum PE=4 SV=1	113.79	0.00189514	2	tr|A0A1D5T1K1|A0A1D5T1K1_WHEAT	104113	138024	36560.5	39300.6	71706.6	0.628541	0	NA	NA	52056.3	69011.8	18280.3	19650.3
tr|A0A1D5VS96|A0A1D5VS96_WHEAT	A0A1D5VS96	NA	Uncharacterized protein OS=Triticum aestivum PE=3 SV=1	57.56	0.00889513	1	tr|A0A1D5VS96|A0A1D5VS96_WHEAT	51973.8	14794.6	23090.8	27272.9	25181.9	0.546096	0.125	NA	NA	51973.8	14794.6	23090.8	27272.9
tr|A0A1D6DD48|A0A1D6DD48_WHEAT	A0A1D6DD48	NA	Uncharacterized protein OS=Triticum aestivum PE=3 SV=1	149.53	0	2	tr|A0A1D6DD48|A0A1D6DD48_WHEAT	103782	47605.6	89205	63851.9	76528.4	0.330649	0	NA	NA	51891.2	23802.8	44602.5	31926
tr|A0A1D5SZ91|A0A1D5SZ91_WHEAT	A0A1D5SZ91	NA	Uncharacterized protein OS=Triticum aestivum PE=3 SV=1	161.39	0	3	tr|A0A1D5SZ91|A0A1D5SZ91_WHEAT	155473	206460	2.56367e+06	925176	565818	1.16723	0.0625	NA	NA	51824.4	68820.1	854556	308392
tr|A0A1D5XY08|A0A1D5XY08_WHEAT	A0A1D5XY08	NA	Uncharacterized protein OS=Triticum aestivum PE=4 SV=1	182.74	0	4	tr|A0A1D5XY08|A0A1D5XY08_WHEAT	154903	974.953	275643	395412	215273	0.815989	0.25	NA	NA	51629.1	319.844	88770.6	124256
tr|W5G0U2|W5G0U2_WHEAT	W5G0U2	NA	Uncharacterized protein OS=Triticum aestivum PE=3 SV=1	118.95	0.000646831	2	tr|W5G0U2|W5G0U2_WHEAT	103151	139126	114264	197025	126695	0.302638	0	NA	NA	51575.5	69562.8	57132	98512.3
tr|A0A1D5SA72|A0A1D5SA72_WHEAT	A0A1D5SA72	NA	Uncharacterized protein OS=Triticum aestivum PE=4 SV=1	197.05	0	7	tr|A0A1D5SA72|A0A1D5SA72_WHEAT	192388	320880	205379	322416	263130	0.273101	0.107143	NA	NA	51552.9	61787.5	51487	72444.8
tr|A0A1D5TG99|A0A1D5TG99_WHEAT	A0A1D5TG99	NA	Uncharacterized protein OS=Triticum aestivum PE=4 SV=1	243.29	0	5	tr|A0A1D5TG99|A0A1D5TG99_WHEAT	154571	54453.6	218396	158901	156736	0.463716	0.25	NA	NA	51513.5	18140.9	58306.7	43840.8
tr|A0A1D5YRG6|A0A1D5YRG6_WHEAT	A0A1D5YRG6	NA	Uncharacterized protein OS=Triticum aestivum PE=3 SV=1	221.42	0	5	tr|A0A1D5YRG6|A0A1D5YRG6_WHEAT	156212	213243	210572	311610	211907	0.290296	0.1	NA	NA	51507.3	64499.7	49862.3	85913.6
tr|A0A1D5YJR0|A0A1D5YJR0_WHEAT	A0A1D5YJR0	NA	Eukaryotic translation initiation factor 3 subunit B OS=Triticum aestivum PE=3 SV=1	62.49	0.00731351	1	tr|A0A1D5YJR0|A0A1D5YJR0_WHEAT	51452.3	6607.45	55415.5	48614.7	50033.5	0.562192	0	NA	NA	51452.3	6607.45	55415.5	48614.7
tr|A0A1D5VIP4|A0A1D5VIP4_WHEAT	A0A1D5VIP4	NA	Uncharacterized protein OS=Triticum aestivum PE=4 SV=1	98.56	0.00178465	2	tr|A0A1D5VIP4|A0A1D5VIP4_WHEAT	102881	125902	100206	91528.2	101543	0.139559	0	NA	NA	51440.4	62950.8	50102.8	45764.1
tr|A0A1D5ZLL7|A0A1D5ZLL7_WHEAT	A0A1D5ZLL7	NA	Uncharacterized protein OS=Triticum aestivum PE=3 SV=1	163.69	0	4	tr|A0A1D5ZLL7|A0A1D5ZLL7_WHEAT	154698	269396	42299.9	59423.6	107061	0.794278	0.0625	NA	NA	51437.6	77670.6	14065.9	19802.7
tr|A0A1D5YF62|A0A1D5YF62_WHEAT	A0A1D5YF62	NA	Uncharacterized protein OS=Triticum aestivum PE=3 SV=1	400.62	0	6	tr|A0A1D5YF62|A0A1D5YF62_WHEAT	158520	467594	289007	272633	280820	0.430121	0.111111	NA	NA	51363.2	141720	85301.1	64083.2
tr|A0A1D5WUM2|A0A1D5WUM2_WHEAT	A0A1D5WUM2	NA	Uncharacterized protein OS=Triticum aestivum PE=4 SV=1	108	0	1	tr|A0A1D5WUM2|A0A1D5WUM2_WHEAT	51303.8	31860.2	7402.05	7595.93	19728	0.864639	0	NA	NA	51303.8	31860.2	7402.05	7595.93
tr|A0A1D6A9K1|A0A1D6A9K1_WHEAT	A0A1D6A9K1	NA	Uncharacterized protein OS=Triticum aestivum PE=4 SV=1	193.33	0	4	tr|A0A1D6A9K1|A0A1D6A9K1_WHEAT	159542	83436	67842.4	102095	92765.3	0.388152	0.25	NA	NA	51261.4	27806.9	22391.8	34026.4
tr|W5F4D5|W5F4D5_WHEAT	W5F4D5	NA	Uncharacterized protein OS=Triticum aestivum PE=4 SV=1	332.05	0	6	tr|W5F4D5|W5F4D5_WHEAT	196292	406391	293731	493759	350061	0.373739	0.025	NA	NA	51167.9	114268	68266.7	125202
tr|W5AMH5|W5AMH5_WHEAT	W5AMH5	NA	Uncharacterized protein OS=Triticum aestivum PE=4 SV=1	192.26	0	2	tr|W5AMH5|W5AMH5_WHEAT	102156	48203	2.86971e+06	474908	288532	1.53832	0.0625	NA	NA	51077.8	24101.5	1.43485e+06	237454
tr|A0A1D6CMU9|A0A1D6CMU9_WHEAT	A0A1D6CMU9	NA	Endoglucanase OS=Triticum aestivum PE=3 SV=1	92.31	0.00172811	2	tr|A0A1D6CMU9|A0A1D6CMU9_WHEAT	102062	57871.3	114242	106870	104466	0.266897	0	NA	NA	51030.8	28935.7	57120.9	53435
tr|A0A1D5RU95|A0A1D5RU95_WHEAT	A0A1D5RU95	NA	Uncharacterized protein OS=Triticum aestivum PE=4 SV=1	124.34	0.000660066	2	tr|A0A1D5RU95|A0A1D5RU95_WHEAT	101880	118390	85362.7	60333.5	93621.2	0.270675	0	NA	NA	50939.9	59195.1	42681.3	30166.8
tr|A0A1D5SLD0|A0A1D5SLD0_WHEAT	A0A1D5SLD0	NA	Uncharacterized protein OS=Triticum aestivum PE=4 SV=1	259.67	0	6	tr|A0A1D5SLD0|A0A1D5SLD0_WHEAT	227835	388784	404882	384490	386637	0.235871	0.0416667	NA	NA	50916.3	118206	101245	117454
tr|A0A1D6AAU4|A0A1D6AAU4_WHEAT	A0A1D6AAU4	NA	Uncharacterized protein OS=Triticum aestivum PE=3 SV=1	359.72	0	7	tr|A0A1D6AAU4|A0A1D6AAU4_WHEAT	187013	131666	968937	638940	412977	0.823101	0.15	NA	NA	50775.7	40928.4	224002	183443
tr|A0A1D5XHJ2|A0A1D5XHJ2_WHEAT	A0A1D5XHJ2	NA	Uncharacterized protein OS=Triticum aestivum PE=4 SV=1	241.66	0	6	tr|A0A1D5XHJ2|A0A1D5XHJ2_WHEAT	206497	137266	141952	188849	165401	0.203639	0.125	NA	NA	50695.3	44636.7	33562.9	44783.1
tr|A0A1D5X9Y5|A0A1D5X9Y5_WHEAT	A0A1D5X9Y5	NA	Purple acid phosphatase OS=Triticum aestivum PE=3 SV=1	117.59	0.000643087	2	tr|A0A1D5X9Y5|A0A1D5X9Y5_WHEAT	101276	183034	27878.5	46950.5	74113.4	0.774177	0	NA	NA	50638.1	91517.1	13939.3	23475.3
tr|A0A1D6BWG3|A0A1D6BWG3_WHEAT	A0A1D6BWG3	NA	Uncharacterized protein OS=Triticum aestivum PE=4 SV=1	335.98	0	7	tr|A0A1D6BWG3|A0A1D6BWG3_WHEAT	208516	226941	224062	296404	225501	0.16373	0.178571	NA	NA	50617.6	64397.1	56285	64965.1
tr|A0A1D6RVI7|A0A1D6RVI7_WHEAT	A0A1D6RVI7	NA	Uncharacterized protein OS=Triticum aestivum PE=4 SV=1	156.36	0	4	tr|A0A1D6RVI7|A0A1D6RVI7_WHEAT	164911	499693	235027	284467	259747	0.487687	0	NA	NA	50602.2	160140	73050.7	87585.1
tr|A0A1D5V5D0|A0A1D5V5D0_WHEAT	A0A1D5V5D0	NA	Uncharacterized protein OS=Triticum aestivum PE=3 SV=1	67.37	0.00603318	1	tr|A0A1D5V5D0|A0A1D5V5D0_WHEAT	50534.3	95422.5	109705	134746	102564	0.362059	0	NA	NA	50534.3	95422.5	109705	134746
tr|A0A1D5YW56|A0A1D5YW56_WHEAT	A0A1D5YW56	NA	Uncharacterized protein OS=Triticum aestivum PE=4 SV=1	65.71	0.00697211	1	tr|A0A1D5YW56|A0A1D5YW56_WHEAT	50170.6	77493	13344.5	15.42	31757.6	0.999931	0.25	NA	NA	50170.6	77493	13344.5	15.42
tr|A0A1D5YW78|A0A1D5YW78_WHEAT	A0A1D5YW78	NA	Uncharacterized protein OS=Triticum aestivum PE=4 SV=1	204.77	0	3	tr|A0A1D5YW78|A0A1D5YW78_WHEAT	150387	55511.3	77415	81199.2	79307.1	0.450976	0.166667	NA	NA	50129	18503.8	25805	27066.4
tr|W5G504|W5G504_WHEAT	W5G504	NA	Uncharacterized protein OS=Triticum aestivum PE=4 SV=1	114.03	0.00189873	4	tr|W5G504|W5G504_WHEAT	150334	147711	56372.2	202893	149022	0.436847	0.1875	NA	NA	50106	49030.6	18785.6	67625.8
tr|A0A1D6BHF6|A0A1D6BHF6_WHEAT	A0A1D6BHF6	NA	Uncharacterized protein OS=Triticum aestivum PE=4 SV=1	514.15	0	12	tr|A0A1D6BHF6|A0A1D6BHF6_WHEAT	264201	269567	314219	413296	291893	0.219007	0.104167	NA	NA	50020	34771.9	61868.5	73246.7
tr|A0A1D6CMP6|A0A1D6CMP6_WHEAT	A0A1D6CMP6	NA	Uncharacterized protein OS=Triticum aestivum PE=4 SV=1	239.85	0	6	tr|A0A1D6CMP6|A0A1D6CMP6_WHEAT	184178	136875	112987	136851	136863	0.209082	0.107143	NA	NA	50015.9	33057.9	34780.2	43010.1
tr|A0A1D5V433|A0A1D5V433_WHEAT	A0A1D5V433	NA	Uncharacterized protein OS=Triticum aestivum PE=3 SV=1	65.84	0.00698254	2	tr|A0A1D5V433|A0A1D5V433_WHEAT	99848	77931.7	40544.7	92397	85164.3	0.339547	0.125	NA	NA	49924	38965.8	20272.3	46198.5
tr|A0A1D5XTG1|A0A1D5XTG1_WHEAT	A0A1D5XTG1	NA	Uncharacterized protein OS=Triticum aestivum PE=4 SV=1	111.7	0.00188088	3	tr|A0A1D5XTG1|A0A1D5XTG1_WHEAT	149729	39627.9	431340	488428	290534	0.782041	0.166667	NA	NA	49909.7	13209.3	143780	162809
tr|A0A1D5XIG0|A0A1D5XIG0_WHEAT	A0A1D5XIG0	NA	Uncharacterized protein OS=Triticum aestivum PE=4 SV=1	68.12	0.00606367	1	tr|A0A1D5XIG0|A0A1D5XIG0_WHEAT	49908.6	49858.2	128035	90660.6	70284.6	0.471889	0	NA	NA	49908.6	49858.2	128035	90660.6
tr|A0A1D6DJW4|A0A1D6DJW4_WHEAT	A0A1D6DJW4	NA	Uncharacterized protein OS=Triticum aestivum PE=4 SV=1	296.76	0	8	tr|A0A1D6DJW4|A0A1D6DJW4_WHEAT	221056	298286	299214	358364	298750	0.191346	0.0625	NA	NA	49851.1	67752.1	61268	81052
tr|A0A1D5X779|A0A1D5X779_WHEAT	A0A1D5X779	NA	Uncharacterized protein OS=Triticum aestivum PE=3 SV=1	332.89	0	3	tr|A0A1D5X779|A0A1D5X779_WHEAT	165466	507222	1.72715e+06	2.03154e+06	1.11719e+06	0.821627	0.0625	NA	NA	49703.9	166435	358621	669756
tr|A0A1D6DH15|A0A1D6DH15_WHEAT	A0A1D6DH15	NA	Uncharacterized protein OS=Triticum aestivum PE=4 SV=1	180.09	0	4	tr|A0A1D6DH15|A0A1D6DH15_WHEAT	150150	71734.3	237740	209572	179861	0.438911	0	NA	NA	49640.5	23695.2	75737.8	65837.2
tr|W5A6D0|W5A6D0_WHEAT	W5A6D0	NA	Uncharacterized protein OS=Triticum aestivum PE=4 SV=1	134.92	0	2	tr|W5A6D0|W5A6D0_WHEAT	99175.7	85331.2	152183	183569	125679	0.35253	0.166667	NA	NA	49587.8	42665.6	76091.3	91784.5
tr|A0A1D5YXM7|A0A1D5YXM7_WHEAT	A0A1D5YXM7	NA	DNA-directed RNA polymerase subunit OS=Triticum aestivum PE=3 SV=1	451.6	0	11	tr|A0A1D5YXM7|A0A1D5YXM7_WHEAT	210515	264104	260879	372957	262491	0.246993	0.145833	NA	NA	49333.7	50492.7	44813.3	86470.4
tr|A0A1D5U7F1|A0A1D5U7F1_WHEAT	A0A1D5U7F1	NA	Uncharacterized protein OS=Triticum aestivum PE=3 SV=1	299.92	0	6	tr|A0A1D5U7F1|A0A1D5U7F1_WHEAT	152123	215335	71307.3	99422.4	125773	0.471406	0.285714	NA	NA	49029.1	54659	23753.7	33125.4
tr|A0A1D6C8B2|A0A1D6C8B2_WHEAT	A0A1D6C8B2	NA	Uncharacterized protein OS=Triticum aestivum PE=4 SV=1	80.92	0.00272777	2	tr|A0A1D6C8B2|A0A1D6C8B2_WHEAT	97939	74602.8	1118.92	177.339	37860.9	1.15844	0.25	NA	NA	48969.5	37301.4	559.458	88.6696
tr|A0A1D5WKQ5|A0A1D5WKQ5_WHEAT	A0A1D5WKQ5	NA	Uncharacterized protein OS=Triticum aestivum PE=3 SV=1	96.52	0.00177096	2	tr|A0A1D5WKQ5|A0A1D5WKQ5_WHEAT	97937.2	56554.5	1.06978e+06	1.13024e+06	583857	1.00445	0	NA	NA	48968.6	28277.2	534888	565118
tr|A0A1D5YHX2|A0A1D5YHX2_WHEAT	A0A1D5YHX2	NA	Uncharacterized protein OS=Triticum aestivum PE=3 SV=1	319.96	0	7	tr|A0A1D5YHX2|A0A1D5YHX2_WHEAT	179644	71919.6	459494	502305	319569	0.69367	0.21875	NA	NA	48950.7	23900.5	93287.6	99540.9
tr|A0A1D5XGV8|A0A1D5XGV8_WHEAT	A0A1D5XGV8	NA	Uncharacterized protein OS=Triticum aestivum PE=4 SV=1	191.07	0	1	tr|A0A1D5XGV8|A0A1D5XGV8_WHEAT	97838.6	312836	455738	609621	384287	0.589803	0	NA	NA	48919.3	156418	227869	304810
tr|A0A1D5XW56|A0A1D5XW56_WHEAT	A0A1D5XW56	NA	Uncharacterized protein OS=Triticum aestivum PE=3 SV=1	139.86	0	2	tr|A0A1D5XW56|A0A1D5XW56_WHEAT	146731	259249	213291	546404	236270	0.604471	0.125	NA	NA	48910.2	86416.3	71097	182135
tr|A0A1D5TEB7|A0A1D5TEB7_WHEAT	A0A1D5TEB7	NA	Uncharacterized protein OS=Triticum aestivum PE=3 SV=1	253.56	0	4	tr|A0A1D5TEB7|A0A1D5TEB7_WHEAT	146753	176371	9669.96	43622.9	95188.1	0.850502	0.125	NA	NA	48868.6	52444.3	3218.18	14535.8
tr|A0A1B1X3I2|A0A1B1X3I2_WHEAT	A0A1B1X3I2	GLDH	L-galactono-1,4-lactone dehydrogenase OS=Triticum aestivum GN=GLDH PE=4 SV=1	117.77	0.000643915	4	tr|A0A1B1X3I2|A0A1B1X3I2_WHEAT	146413	97859.4	224814	244078	185614	0.38285	0.25	NA	NA	48799.2	32614.7	74932.9	81354.2
tr|A0A1D5SGI0|A0A1D5SGI0_WHEAT	A0A1D5SGI0	NA	Uncharacterized protein OS=Triticum aestivum PE=4 SV=1	174.28	0	4	tr|A0A1D5SGI0|A0A1D5SGI0_WHEAT	153185	177226	106557	129946	141566	0.214291	0.1	NA	NA	48779.9	59070.2	35513.8	42900.9
tr|A0A1D6S3N4|A0A1D6S3N4_WHEAT	A0A1D6S3N4	NA	Uncharacterized protein OS=Triticum aestivum PE=4 SV=1	357.45	0	6	tr|A0A1D6S3N4|A0A1D6S3N4_WHEAT	173318	283677	237441	304332	260559	0.232649	0.178571	NA	NA	48741.1	84472.8	67103.9	85597.6
tr|W5E225|W5E225_WHEAT	W5E225	NA	Uncharacterized protein OS=Triticum aestivum PE=4 SV=1	283.74	0	5	tr|W5E225|W5E225_WHEAT	155245	275152	1.51409e+06	817965	546558	0.897892	0.1	NA	NA	48621.9	91184.5	433377	237459
tr|A0A1D5SDP1|A0A1D5SDP1_WHEAT	A0A1D5SDP1	NA	Uncharacterized protein OS=Triticum aestivum PE=4 SV=1	176.79	0	6	tr|A0A1D5SDP1|A0A1D5SDP1_WHEAT	170469	86515	96610.1	122168	109389	0.315168	0.125	NA	NA	48493.4	27975	29852.5	36481.5
tr|A0A1D5TEI3|A0A1D5TEI3_WHEAT	A0A1D5TEI3	NA	Uncharacterized protein OS=Triticum aestivum PE=4 SV=1	195.64	0	2	tr|A0A1D5TEI3|A0A1D5TEI3_WHEAT	96877.6	58601.9	26939.1	27548.6	43075.2	0.630163	0.5	NA	NA	48438.8	29300.9	13469.6	13774.3
tr|A0A1D6B283|A0A1D6B283_WHEAT	A0A1D6B283	NA	Uncharacterized protein OS=Triticum aestivum PE=4 SV=1	115.82	0.00127551	3	tr|A0A1D6B283|A0A1D6B283_WHEAT	145298	96944.1	141852	359110	143575	0.633044	0	NA	NA	48432.5	32314.7	47284.1	119703
tr|A0A1D5YFE4|A0A1D5YFE4_WHEAT	A0A1D5YFE4	NA	Uncharacterized protein OS=Triticum aestivum PE=4 SV=1	193.14	0	5	tr|A0A1D5YFE4|A0A1D5YFE4_WHEAT	146288	229213	86451.8	140303	143295	0.391421	0.2	NA	NA	48378.4	66220.1	28567.2	46757.6
tr|A0A1D6DHI9|A0A1D6DHI9_WHEAT	A0A1D6DHI9	NA	Uncharacterized protein OS=Triticum aestivum PE=4 SV=1	322.19	0	6	tr|A0A1D6DHI9|A0A1D6DHI9_WHEAT	172812	203200	765674	1.01997e+06	484437	0.777448	0.0416667	NA	NA	48371.4	56058.5	230494	304212
tr|A0A1D6CLP7|A0A1D6CLP7_WHEAT	A0A1D6CLP7	NA	Uncharacterized protein OS=Triticum aestivum PE=4 SV=1	71.23	0.00564682	3	tr|A0A1D6CLP7|A0A1D6CLP7_WHEAT	144887	45049.5	169846	151133	148010	0.43945	0.0625	NA	NA	48295.7	15016.5	56615.2	50377.6
tr|A0A1D6SB89|A0A1D6SB89_WHEAT	A0A1D6SB89	NA	Uncharacterized protein OS=Triticum aestivum PE=4 SV=1	301.87	0	5	tr|A0A1D6SB89|A0A1D6SB89_WHEAT	144782	101184	89113.7	85760.5	95149	0.258531	0.4	NA	NA	48250.4	33207.9	29694.3	28576.6
tr|A0A1D5WZU4|A0A1D5WZU4_WHEAT	A0A1D5WZU4	NA	Uncharacterized protein OS=Triticum aestivum PE=4 SV=1	171	0	2	tr|A0A1D5WZU4|A0A1D5WZU4_WHEAT	96450.7	189300	400285	491186	294793	0.620871	0	NA	NA	48225.4	94650.1	200143	245593
tr|W5A6E7|W5A6E7_WHEAT	W5A6E7	NA	Uncharacterized protein OS=Triticum aestivum PE=4 SV=1	176.05	0	3	tr|W5A6E7|W5A6E7_WHEAT	144588	61199.5	112956	144059	128507	0.33905	0.1875	NA	NA	48196.1	20399.8	37651.9	48019.5
tr|A0A1D5RS02|A0A1D5RS02_WHEAT	A0A1D5RS02	NA	Uncharacterized protein OS=Triticum aestivum PE=4 SV=1	93.15	0.00173611	3	tr|A0A1D5RS02|A0A1D5RS02_WHEAT	144232	124535	202455	298971	173343	0.406559	0	NA	NA	48077.3	41511.5	67485.1	99657.1
tr|A0A1D5VFA1|A0A1D5VFA1_WHEAT	A0A1D5VFA1	NA	H/ACA ribonucleoprotein complex subunit OS=Triticum aestivum PE=3 SV=1	67.07	0.0060241	2	tr|A0A1D5VFA1|A0A1D5VFA1_WHEAT	96081	88146.3	64868.5	103922	92113.7	0.191135	0.25	NA	NA	48040.5	44073.1	32434.3	51960.9
sp|P24846|DAPA1_WHEAT	P24846	NA	4-hydroxy-tetrahydrodipicolinate synthase 1, chloroplastic OS=Triticum aestivum PE=1 SV=1	138.12	0	3	sp|P24846|DAPA1_WHEAT	144113	101899	78103.4	350933	123006	0.737588	0.0833333	NA	NA	48037.8	33966.3	26034.5	116978
tr|A0A1D5V9Y2|A0A1D5V9Y2_WHEAT	A0A1D5V9Y2	NA	Uncharacterized protein OS=Triticum aestivum PE=4 SV=1	58.29	0.00801509	1	tr|A0A1D5V9Y2|A0A1D5V9Y2_WHEAT	47911.2	3834.1	111367	153336	79639.3	0.83814	0	NA	NA	47911.2	3834.1	111367	153336
tr|A0A1D6BY82|A0A1D6BY82_WHEAT	A0A1D6BY82	NA	Uncharacterized protein OS=Triticum aestivum PE=3 SV=1	108.69	0.00185989	4	tr|A0A1D6BY82|A0A1D6BY82_WHEAT	166011	154848	277031	298468	221521	0.330973	0	NA	NA	47904	51607	92027.7	99364.6
tr|A0A1D6RK35|A0A1D6RK35_WHEAT	A0A1D6RK35	NA	Peroxidase OS=Triticum aestivum PE=3 SV=1	95.03	0.00175336	3	tr|A0A1D6RK35|A0A1D6RK35_WHEAT	143414	124998	92429.1	71503.9	108713	0.298243	0.166667	NA	NA	47804.7	41665.9	30809.7	23834.6
tr|A0A1D6AT37|A0A1D6AT37_WHEAT	A0A1D6AT37	NA	Uncharacterized protein OS=Triticum aestivum PE=4 SV=1	345.04	0	9	tr|A0A1D6AT37|A0A1D6AT37_WHEAT	215469	157312	193919	264083	204694	0.214753	0.111111	NA	NA	47781.5	28692.6	44732.6	59582.4
tr|A0A1D5UNV9|A0A1D5UNV9_WHEAT	A0A1D5UNV9	NA	Uncharacterized protein OS=Triticum aestivum PE=4 SV=1	77.37	0.0031864	1	tr|A0A1D5UNV9|A0A1D5UNV9_WHEAT	47738.8	55637.9	7825.57	35554.6	41646.7	0.57076	0	NA	NA	47738.8	55637.9	7825.57	35554.6
tr|A0A1D5TLH4|A0A1D5TLH4_WHEAT	A0A1D5TLH4	NA	Uncharacterized protein OS=Triticum aestivum PE=4 SV=1	457.78	0	7	tr|A0A1D5TLH4|A0A1D5TLH4_WHEAT	180191	118514	65501.2	109854	114184	0.398437	0.25	NA	NA	47664.9	34571.1	21237.3	35929.9
tr|A0A1D6D5H8|A0A1D6D5H8_WHEAT	A0A1D6D5H8	NA	Uncharacterized protein OS=Triticum aestivum PE=4 SV=1	78.9	0.00321716	1	tr|A0A1D6D5H8|A0A1D6D5H8_WHEAT	95143.8	205145	30796	487076	150144	0.985843	0.125	NA	NA	47571.9	102573	15398	243538
tr|W5GUQ7|W5GUQ7_WHEAT	W5GUQ7	NA	Peroxidase OS=Triticum aestivum PE=3 SV=1	59.06	0.00805306	1	tr|W5GUQ7|W5GUQ7_WHEAT	47506.1	58042.6	55158.2	108835	56600.4	0.41535	0	NA	NA	47506.1	58042.6	55158.2	108835
tr|A0A1D5V5M3|A0A1D5V5M3_WHEAT	A0A1D5V5M3	NA	Uncharacterized protein OS=Triticum aestivum PE=4 SV=1	62.64	0.00732064	2	tr|A0A1D5V5M3|A0A1D5V5M3_WHEAT	94955.6	148853	97069.8	82706	96012.7	0.276968	0	NA	NA	47477.8	74426.7	48534.9	41353
tr|A0A1D5Y8U4|A0A1D5Y8U4_WHEAT	A0A1D5Y8U4	NA	Uncharacterized protein OS=Triticum aestivum PE=4 SV=1	166.27	0	3	tr|A0A1D5Y8U4|A0A1D5Y8U4_WHEAT	142320	144404	198205	281301	171305	0.34027	0.3	NA	NA	47280.7	48129.6	66003.2	93756.6
tr|A0A1D6S0M0|A0A1D6S0M0_WHEAT	A0A1D6S0M0	NA	Lipoxygenase OS=Triticum aestivum PE=3 SV=1	397.65	0	7	tr|A0A1D6S0M0|A0A1D6S0M0_WHEAT	183422	226632	191763	242578	209197	0.133206	0.166667	NA	NA	47169.8	65120.5	51678.1	66537
tr|W5D4W6|W5D4W6_WHEAT	W5D4W6	TRAES_3BF153000010CFD_c1	Uncharacterized protein OS=Triticum aestivum GN=TRAES_3BF153000010CFD_c1 PE=4 SV=1	128.07	0	1	tr|W5D4W6|W5D4W6_WHEAT	47070.5	77289.8	121.638	909.76	23990.1	1.202	0.5	NA	NA	47070.5	77289.8	121.638	909.76
tr|A0A1D5S2F3|A0A1D5S2F3_WHEAT	A0A1D5S2F3	NA	Uncharacterized protein OS=Triticum aestivum PE=4 SV=1	153.85	0	5	tr|A0A1D5S2F3|A0A1D5S2F3_WHEAT	159075	139749	65518.3	97658.1	118704	0.364024	0.1	NA	NA	46963.9	41727.7	20430.1	29244.7
tr|A0A1D5Y8R1|A0A1D5Y8R1_WHEAT	A0A1D5Y8R1	NA	Uncharacterized protein OS=Triticum aestivum PE=4 SV=1	242.91	0	4	tr|A0A1D5Y8R1|A0A1D5Y8R1_WHEAT	140041	208176	102949	123778	131909	0.316994	0.35	NA	NA	46675.1	69208.7	34306.2	41249
tr|A0A1D5S562|A0A1D5S562_WHEAT	A0A1D5S562	NA	Uncharacterized protein OS=Triticum aestivum PE=4 SV=1	389	0	5	tr|A0A1D5S562|A0A1D5S562_WHEAT	140514	168306	75130.2	86369.3	113441	0.376372	0.125	NA	NA	46650.8	45655.9	24741.5	28667.1
tr|A0A077RTW4|A0A077RTW4_WHEAT	A0A077RTW4	TRAES_3BF011700090CFD_c1	Serine/threonine-protein phosphatase OS=Triticum aestivum GN=TRAES_3BF011700090CFD_c1 PE=3 SV=1	178.04	0	3	tr|A0A077RTW4|A0A077RTW4_WHEAT	139904	135021	248365	343332	194135	0.458533	0.0625	NA	NA	46634.6	45007	82788.4	114444
tr|A0A096ULP0|A0A096ULP0_WHEAT	A0A096ULP0	NA	Uncharacterized protein OS=Triticum aestivum PE=3 SV=1	142.67	0	3	tr|A0A096ULP0|A0A096ULP0_WHEAT	139851	69540.5	108870	118346	113608	0.269506	0	NA	NA	46616.9	23180.2	36290	39448.6
tr|A0A1D6AB22|A0A1D6AB22_WHEAT	A0A1D6AB22	NA	Uncharacterized protein OS=Triticum aestivum PE=4 SV=1	122.82	0.000656168	2	tr|A0A1D6AB22|A0A1D6AB22_WHEAT	92956.3	84147.2	97296	101352	95126.2	0.0784847	0.375	NA	NA	46478.2	42073.6	48648	50676
tr|A0A1D6C4E9|A0A1D6C4E9_WHEAT	A0A1D6C4E9	NA	Uncharacterized protein OS=Triticum aestivum PE=4 SV=1	159.08	0	3	tr|A0A1D6C4E9|A0A1D6C4E9_WHEAT	139202	165154	31914	110599	124900	0.516298	0	NA	NA	46400.8	55051.4	10638	36866.2
tr|A0A1D5Y4T2|A0A1D5Y4T2_WHEAT	A0A1D5Y4T2	NA	Uncharacterized protein OS=Triticum aestivum PE=4 SV=1	76.19	0.00316456	1	tr|A0A1D5Y4T2|A0A1D5Y4T2_WHEAT	46394.2	21788.1	59067.9	78394	52731.1	0.461581	0.125	NA	NA	46394.2	21788.1	59067.9	78394
tr|W5FFT4|W5FFT4_WHEAT	W5FFT4	NA	Uncharacterized protein OS=Triticum aestivum PE=3 SV=1	106.5	0.00184275	2	tr|W5FFT4|W5FFT4_WHEAT	139065	61170.7	195214	219782	167140	0.457676	0.25	NA	NA	46355.1	20390.2	65071.3	73260.6
tr|A0A1D5WTN1|A0A1D5WTN1_WHEAT	A0A1D5WTN1	NA	Uncharacterized protein OS=Triticum aestivum PE=4 SV=1	143.71	0	3	tr|A0A1D5WTN1|A0A1D5WTN1_WHEAT	139059	43322.7	47211.5	25873.8	45267.1	0.79822	0.333333	NA	NA	46353	14440.9	15737.2	8624.59
tr|A0A1D5TTU3|A0A1D5TTU3_WHEAT	A0A1D5TTU3	NA	Uncharacterized protein OS=Triticum aestivum PE=4 SV=1	60.37	0	1	tr|A0A1D5TTU3|A0A1D5TTU3_WHEAT	46253.5	146002	30610.6	9347.45	38432.1	1.04304	0	NA	NA	46253.5	146002	30610.6	9347.45
tr|A0A1D6BXA9|A0A1D6BXA9_WHEAT	A0A1D6BXA9	NA	Carboxypeptidase OS=Triticum aestivum PE=3 SV=1	410.92	0	6	tr|A0A1D6BXA9|A0A1D6BXA9_WHEAT	163066	321497	381820	413060	351658	0.347726	0.204545	NA	NA	46157.8	79367.1	91075.2	107153
tr|A0A1D5TK55|A0A1D5TK55_WHEAT	A0A1D5TK55	NA	Uncharacterized protein OS=Triticum aestivum PE=4 SV=1	244.08	0	3	tr|A0A1D5TK55|A0A1D5TK55_WHEAT	138472	91590.9	310436	148736	143604	0.553573	0.15	NA	NA	46157.3	30530.3	103479	49578.5
tr|A0A1D6BN53|A0A1D6BN53_WHEAT	A0A1D6BN53	NA	Uncharacterized protein OS=Triticum aestivum PE=4 SV=1	75.77	0	1	tr|A0A1D6BN53|A0A1D6BN53_WHEAT	46147.2	54156.4	16291.8	13302.5	31219.5	0.637678	0	NA	NA	46147.2	54156.4	16291.8	13302.5
tr|A0A1D5SEU4|A0A1D5SEU4_WHEAT	A0A1D5SEU4	NA	Uncharacterized protein OS=Triticum aestivum PE=4 SV=1	56.38	0.009298	2	tr|A0A1D5SEU4|A0A1D5SEU4_WHEAT	92197.7	32505.9	140054	149328	116126	0.51733	0.125	NA	NA	46098.8	16253	70027.2	74664.2
tr|A0A1D5UUE1|A0A1D5UUE1_WHEAT	A0A1D5UUE1	NA	Uncharacterized protein OS=Triticum aestivum PE=4 SV=1	65.6	0.00696864	1	tr|A0A1D5UUE1|A0A1D5UUE1_WHEAT	46068.5	64916	125544	114149	89532.5	0.43604	0.125	NA	NA	46068.5	64916	125544	114149
tr|A0A1D5TYB5|A0A1D5TYB5_WHEAT	A0A1D5TYB5	NA	Uncharacterized protein OS=Triticum aestivum PE=4 SV=1	102.2	0.00180941	2	tr|A0A1D5TYB5|A0A1D5TYB5_WHEAT	91887.5	92643.8	174756	167034	129839	0.345849	0	NA	NA	45943.7	46321.9	87377.9	83516.9
tr|A0A1D6C7W0|A0A1D6C7W0_WHEAT	A0A1D6C7W0	NA	Uncharacterized protein OS=Triticum aestivum PE=3 SV=1	305.18	0	6	tr|A0A1D6C7W0|A0A1D6C7W0_WHEAT	178071	64233.4	173308	285416	175690	0.515356	0.0714286	NA	NA	45908.7	20163	41257.7	70162.7
tr|A0A1D6A9Y8|A0A1D6A9Y8_WHEAT	A0A1D6A9Y8	NA	E3 ubiquitin-protein ligase OS=Triticum aestivum PE=3 SV=1	127.46	0	2	tr|A0A1D6A9Y8|A0A1D6A9Y8_WHEAT	91384.9	89275.5	182552	159843	125614	0.364078	0	NA	NA	45692.5	44637.8	91276.1	79921.6
tr|W5HBZ2|W5HBZ2_WHEAT	W5HBZ2	NA	Uncharacterized protein OS=Triticum aestivum PE=3 SV=1	185.02	0	6	tr|W5HBZ2|W5HBZ2_WHEAT	151299	188050	96409.8	92550.8	123855	0.347977	0.214286	NA	NA	45683	56661	26403.9	26174.1
tr|A0A1D5UGA2|A0A1D5UGA2_WHEAT	A0A1D5UGA2	NA	Uncharacterized protein OS=Triticum aestivum PE=4 SV=1	66.68	0.00651303	1	tr|A0A1D5UGA2|A0A1D5UGA2_WHEAT	45657.9	55374.7	67637.2	98245.2	61505.9	0.342501	0	NA	NA	45657.9	55374.7	67637.2	98245.2
tr|A0A1D5WZ09|A0A1D5WZ09_WHEAT	A0A1D5WZ09	NA	ATP-dependent Clp protease proteolytic subunit OS=Triticum aestivum PE=3 SV=1	198.07	0	2	tr|A0A1D5WZ09|A0A1D5WZ09_WHEAT	91135.4	106187	34785.7	56013.2	73574.3	0.451671	0.333333	NA	NA	45567.7	53093.3	17392.8	28006.6
tr|A0A1D6C953|A0A1D6C953_WHEAT	A0A1D6C953	NA	Uncharacterized protein OS=Triticum aestivum PE=4 SV=1	237.18	0	4	tr|A0A1D6C953|A0A1D6C953_WHEAT	167213	151620	153889	102897	152754	0.195899	0.0625	NA	NA	45566.4	50503.3	51291.3	34281.7
tr|A0A1D5Y934|A0A1D5Y934_WHEAT	A0A1D5Y934	NA	Uncharacterized protein OS=Triticum aestivum PE=4 SV=1	133.75	0	3	tr|A0A1D5Y934|A0A1D5Y934_WHEAT	136374	146702	123791	164650	141538	0.120904	0.0833333	NA	NA	45458.1	48900.7	41263.7	54883.2
tr|A0A1D5X1L5|A0A1D5X1L5_WHEAT	A0A1D5X1L5	NA	Uncharacterized protein OS=Triticum aestivum PE=4 SV=1	91.41	0.00172018	1	tr|A0A1D5X1L5|A0A1D5X1L5_WHEAT	45405.6	29865.8	67343.8	69789.2	56374.7	0.357386	0	NA	NA	45405.6	29865.8	67343.8	69789.2
tr|A0A1D6S0D8|A0A1D6S0D8_WHEAT	A0A1D6S0D8	NA	Uncharacterized protein OS=Triticum aestivum PE=4 SV=1	201.8	0	4	tr|A0A1D6S0D8|A0A1D6S0D8_WHEAT	149967	224228	28098.7	61547.9	105758	0.764197	0.1875	NA	NA	45307.1	65719.3	9361.1	20510.8
tr|A0A1D6AZD9|A0A1D6AZD9_WHEAT	A0A1D6AZD9	NA	Uncharacterized protein OS=Triticum aestivum PE=4 SV=1	242.16	0	4	tr|A0A1D6AZD9|A0A1D6AZD9_WHEAT	137174	527330	136500	162071	149622	0.795	0	NA	NA	45177	156633	44628.2	53098.7
tr|W5C0D1|W5C0D1_WHEAT	W5C0D1	NA	Uncharacterized protein OS=Triticum aestivum PE=4 SV=1	283.12	0	6	tr|W5C0D1|W5C0D1_WHEAT	158028	189439	148414	207766	173733	0.156497	0.178571	NA	NA	45104.8	55351.9	37792.1	52642.2
tr|A0A1D5VFN9|A0A1D5VFN9_WHEAT	A0A1D5VFN9	NA	Uncharacterized protein OS=Triticum aestivum PE=3 SV=1	232.59	0	5	tr|A0A1D5VFN9|A0A1D5VFN9_WHEAT	180156	148648	186670	249930	183413	0.221768	0.05	NA	NA	45083.6	42916.6	53098.9	74765.9
tr|A0A1D6C7E6|A0A1D6C7E6_WHEAT	A0A1D6C7E6	NA	Uncharacterized protein OS=Triticum aestivum PE=4 SV=1	108.86	0.0018622	2	tr|A0A1D6C7E6|A0A1D6C7E6_WHEAT	90149.3	35996.3	101300	139385	95724.5	0.465672	0	NA	NA	45074.7	17998.2	50649.9	69692.5
tr|A0A1D5YWC9|A0A1D5YWC9_WHEAT	A0A1D5YWC9	NA	Plasma membrane ATPase OS=Triticum aestivum PE=3 SV=1	122.18	0.00065445	4	tr|A0A1D5YWC9|A0A1D5YWC9_WHEAT	135310	132224	101307	103249	117736	0.154556	0.05	NA	NA	44925	41845.5	33714.9	34159.4
tr|A0A1D5V9Z7|A0A1D5V9Z7_WHEAT	A0A1D5V9Z7	NA	Uncharacterized protein OS=Triticum aestivum PE=4 SV=1	303.83	0	6	tr|A0A1D5V9Z7|A0A1D5V9Z7_WHEAT	137433	102725	198107	299098	167770	0.466866	0.125	NA	NA	44758.2	33584.8	60942.8	87632.3
tr|A0A1D6BRV9|A0A1D6BRV9_WHEAT	A0A1D6BRV9	NA	Uncharacterized protein OS=Triticum aestivum PE=4 SV=1	147.05	0	4	tr|A0A1D6BRV9|A0A1D6BRV9_WHEAT	134532	297105	147378	276634	212006	0.396515	0.0625	NA	NA	44696.2	99030	47437.1	86440.2
tr|A0A1D6AJ50|A0A1D6AJ50_WHEAT	A0A1D6AJ50	NA	Uncharacterized protein OS=Triticum aestivum PE=4 SV=1	384.36	0	7	tr|A0A1D6AJ50|A0A1D6AJ50_WHEAT	170507	236184	172253	266455	204219	0.226091	0.09375	NA	NA	44475.4	55472.7	48498	85108.9
tr|W5I4X7|W5I4X7_WHEAT	W5I4X7	NA	Uncharacterized protein OS=Triticum aestivum PE=3 SV=1	274.02	0	5	tr|W5I4X7|W5I4X7_WHEAT	152951	196458	331278	454626	263868	0.482166	0.0714286	NA	NA	44400.4	54473.4	109766	151263
tr|W5C4N4|W5C4N4_WHEAT	W5C4N4	NA	Xylose isomerase OS=Triticum aestivum PE=3 SV=1	55.05	0.00969529	1	tr|W5C4N4|W5C4N4_WHEAT	44338.6	29468.9	50138.7	73177.3	47238.6	0.36838	0	NA	NA	44338.6	29468.9	50138.7	73177.3
tr|A0A1D6DEK9|A0A1D6DEK9_WHEAT	A0A1D6DEK9	NA	Uncharacterized protein OS=Triticum aestivum PE=4 SV=1	71.61	0.00566718	1	tr|A0A1D6DEK9|A0A1D6DEK9_WHEAT	44225.7	37424.9	46653.3	23286.7	40825.3	0.276919	0	NA	NA	44225.7	37424.9	46653.3	23286.7
tr|A0A1D5STA7|A0A1D5STA7_WHEAT	A0A1D5STA7	NA	Uncharacterized protein OS=Triticum aestivum PE=4 SV=1	189.49	0	4	tr|A0A1D5STA7|A0A1D5STA7_WHEAT	145398	184327	181189	260851	182758	0.251863	0.0625	NA	NA	44201.9	61437.3	56002.8	82082.7
tr|A0A1D5XF90|A0A1D5XF90_WHEAT	A0A1D5XF90	NA	Beta-adaptin-like protein OS=Triticum aestivum PE=3 SV=1	299.15	0	7	tr|A0A1D5XF90|A0A1D5XF90_WHEAT	166185	252330	426101	309440	280885	0.377792	0.09375	NA	NA	44141.1	61736.2	114057	72941.3
tr|W5FN32|W5FN32_WHEAT	W5FN32	NA	Uncharacterized protein OS=Triticum aestivum PE=4 SV=1	205.22	0	4	tr|W5FN32|W5FN32_WHEAT	145331	142690	159630	125973	144010	0.0962344	0.2	NA	NA	44096.4	39047.2	53156.2	41033.9
tr|A0A1D5X6T9|A0A1D5X6T9_WHEAT	A0A1D5X6T9	NA	Uncharacterized protein OS=Triticum aestivum PE=4 SV=1	44.94	0	2	tr|A0A1D5X6T9|A0A1D5X6T9_WHEAT	88118.8	99596.3	77852.1	52150.4	82985.5	0.254803	0.25	NA	NA	44059.4	49798.1	38926.1	26075.2
tr|A0A1D5SK37|A0A1D5SK37_WHEAT	A0A1D5SK37	NA	Peroxidase OS=Triticum aestivum PE=3 SV=1	154.55	0	3	tr|A0A1D5SK37|A0A1D5SK37_WHEAT	131760	121010	113944	159374	126385	0.151768	0	NA	NA	43920	40336.6	37981.3	53124.8
tr|W5A4L3|W5A4L3_WHEAT	W5A4L3	NA	Uncharacterized protein OS=Triticum aestivum PE=4 SV=1	99.92	0.00179211	2	tr|W5A4L3|W5A4L3_WHEAT	87644.9	59423	59665.1	131793	73655	0.403135	0	NA	NA	43822.4	29711.5	29832.6	65896.7
tr|A0A1D5X6D1|A0A1D5X6D1_WHEAT	A0A1D5X6D1	NA	Uncharacterized protein OS=Triticum aestivum PE=3 SV=1	59.48	0.00807217	1	tr|A0A1D5X6D1|A0A1D5X6D1_WHEAT	43763.3	69424.4	82940.4	69630.1	69527.3	0.246642	0	NA	NA	43763.3	69424.4	82940.4	69630.1
tr|A0A1D6AMJ7|A0A1D6AMJ7_WHEAT	A0A1D6AMJ7	NA	Uncharacterized protein OS=Triticum aestivum PE=4 SV=1	471.3	0	10	tr|A0A1D6AMJ7|A0A1D6AMJ7_WHEAT	177524	258769	134078	202339	189931	0.269381	0.229167	NA	NA	43747.7	39755	28949.5	49419.4
tr|A0A1D5XHC8|A0A1D5XHC8_WHEAT	A0A1D5XHC8	NA	Uncharacterized protein OS=Triticum aestivum PE=4 SV=1	232.27	0	6	tr|A0A1D5XHC8|A0A1D5XHC8_WHEAT	154053	200227	271710	371320	235968	0.379588	0.0625	NA	NA	43736.6	44148.3	87766.9	119006
tr|A0A1D5WWA2|A0A1D5WWA2_WHEAT	A0A1D5WWA2	NA	Uncharacterized protein OS=Triticum aestivum PE=4 SV=1	257.85	0	3	tr|A0A1D5WWA2|A0A1D5WWA2_WHEAT	131129	147547	259947	184657	166102	0.316923	0.166667	NA	NA	43688.1	49055.8	86372.8	61445.2
tr|A0A1D5T1P6|A0A1D5T1P6_WHEAT	A0A1D5T1P6	NA	Uncharacterized protein OS=Triticum aestivum PE=4 SV=1	921.83	0	13	tr|A0A1D5T1P6|A0A1D5T1P6_WHEAT	201934	106292	1.23092e+06	1.34407e+06	716426	0.911687	0.140625	NA	NA	43673.2	27220.5	210351	237772
tr|A0A1D6C235|A0A1D6C235_WHEAT	A0A1D6C235	NA	Uncharacterized protein OS=Triticum aestivum PE=4 SV=1	49.05	0	2	tr|A0A1D6C235|A0A1D6C235_WHEAT	87233	193494	9635.11	72521	79877	0.841416	0.125	NA	NA	43616.5	96747	4817.55	36260.5
tr|W5DR79|W5DR79_WHEAT	W5DR79	NA	Uncharacterized protein OS=Triticum aestivum PE=4 SV=1	60.99	0.00769231	1	tr|W5DR79|W5DR79_WHEAT	43573	15.42	15.42	15.42	15.42	1.99717	0.75	NA	NA	43573	15.42	15.42	15.42
tr|A0A1D6RP02|A0A1D6RP02_WHEAT	A0A1D6RP02	NA	Uncharacterized protein OS=Triticum aestivum PE=4 SV=1	259.82	0	5	tr|A0A1D6RP02|A0A1D6RP02_WHEAT	137624	155448	187375	283607	171412	0.340655	0.125	NA	NA	43499	51805.7	51508.5	82280.9
tr|A0A1D5VEB5|A0A1D5VEB5_WHEAT	A0A1D5VEB5	NA	Uncharacterized protein OS=Triticum aestivum PE=4 SV=1	210.81	0	5	tr|A0A1D5VEB5|A0A1D5VEB5_WHEAT	141649	260079	406049	528091	333064	0.504981	0	NA	NA	43494.9	70789.9	120549	162388
tr|A0A1D5UU18|A0A1D5UU18_WHEAT	A0A1D5UU18	NA	Uncharacterized protein OS=Triticum aestivum PE=3 SV=1	313.05	0	3	tr|A0A1D5UU18|A0A1D5UU18_WHEAT	130400	257341	413023	573415	335182	0.558721	0.208333	NA	NA	43466.6	85780.2	137674	191138
tr|W5A8H0|W5A8H0_WHEAT	W5A8H0	NA	Tubulin gamma chain OS=Triticum aestivum PE=3 SV=1	137.46	0	3	tr|W5A8H0|W5A8H0_WHEAT	130298	187145	64823	59124.3	97560.3	0.548553	0	NA	NA	43432.5	62381.8	21607.7	19708.1
tr|A0A1D5YMU3|A0A1D5YMU3_WHEAT	A0A1D5YMU3	NA	Uncharacterized protein OS=Triticum aestivum PE=4 SV=1	147.92	0	3	tr|A0A1D5YMU3|A0A1D5YMU3_WHEAT	132416	420103	122515	176533	154475	0.658185	0	NA	NA	43413	139595	38629.5	48466.7
tr|A0A1D5Z179|A0A1D5Z179_WHEAT	A0A1D5Z179	NA	Uncharacterized protein OS=Triticum aestivum PE=4 SV=1	78.13	0.0032	1	tr|A0A1D5Z179|A0A1D5Z179_WHEAT	43370.5	29251.3	7781.18	7012.02	18516.3	0.808265	0	NA	NA	43370.5	29251.3	7781.18	7012.02
tr|A0A1D6RN34|A0A1D6RN34_WHEAT	A0A1D6RN34	NA	Uncharacterized protein OS=Triticum aestivum PE=4 SV=1	268.3	0	5	tr|A0A1D6RN34|A0A1D6RN34_WHEAT	160584	202699	143488	185685	173134	0.151666	0.125	NA	NA	43227.2	57077.4	42180.4	47970.1
tr|A0A1D6D411|A0A1D6D411_WHEAT	A0A1D6D411	NA	Uncharacterized protein OS=Triticum aestivum PE=4 SV=1	204.49	0	6	tr|A0A1D6D411|A0A1D6D411_WHEAT	158567	207552	158153	255799	183059	0.2394	0	NA	NA	43224.2	58409.6	45244	70652.3
tr|A0A077RVN7|A0A077RVN7_WHEAT	A0A077RVN7	TRAES_3BF007400110CFD_c1	Uncharacterized protein OS=Triticum aestivum GN=TRAES_3BF007400110CFD_c1 PE=4 SV=1	99.89	0.00178998	3	tr|A0A077RVN7|A0A077RVN7_WHEAT	129615	116682	145901	110399	123149	0.124898	0	NA	NA	43204.9	38894.1	48633.8	36799.7
tr|A0A1D5YJ23|A0A1D5YJ23_WHEAT	A0A1D5YJ23	NA	Uncharacterized protein OS=Triticum aestivum PE=3 SV=1	55.84	0.00927644	1	tr|A0A1D5YJ23|A0A1D5YJ23_WHEAT	43191.1	60197.2	4780.28	15098.9	29145	0.825459	0	NA	NA	43191.1	60197.2	4780.28	15098.9
tr|A0A1D6ADT1|A0A1D6ADT1_WHEAT	A0A1D6ADT1	NA	Uncharacterized protein OS=Triticum aestivum PE=4 SV=1	84.47	0.00222593	2	tr|A0A1D6ADT1|A0A1D6ADT1_WHEAT	86369.4	35998.7	65634.1	88611.9	76001.7	0.352894	0.25	NA	NA	43184.7	17999.3	32817.1	44306
tr|A0A1D5W599|A0A1D5W599_WHEAT	A0A1D5W599	NA	Uncharacterized protein OS=Triticum aestivum PE=4 SV=1	275.26	0	5	tr|A0A1D5W599|A0A1D5W599_WHEAT	129422	93256.6	222454	160861	145142	0.361573	0.125	NA	NA	43126.3	30976	67362.3	53543.6
tr|A0A1D5WG62|A0A1D5WG62_WHEAT	A0A1D5WG62	NA	Uncharacterized protein OS=Triticum aestivum PE=4 SV=1	76.57	0.00317292	1	tr|A0A1D5WG62|A0A1D5WG62_WHEAT	43118.2	31390.8	13011.3	12963.4	22201.1	0.589393	0	NA	NA	43118.2	31390.8	13011.3	12963.4
tr|A0A1D5YTA1|A0A1D5YTA1_WHEAT	A0A1D5YTA1	NA	Uncharacterized protein OS=Triticum aestivum PE=4 SV=1	103.44	0.00181928	2	tr|A0A1D5YTA1|A0A1D5YTA1_WHEAT	86222	78254	35590.1	49850.1	64052.1	0.380453	0	NA	NA	43111	39127	17795	24925.1
tr|A0A1D6BUU4|A0A1D6BUU4_WHEAT	A0A1D6BUU4	NA	Uncharacterized protein OS=Triticum aestivum PE=4 SV=1	123.15	0.000656599	3	tr|A0A1D6BUU4|A0A1D6BUU4_WHEAT	129227	95585.1	112943	150669	121085	0.192288	0.333333	NA	NA	43075.7	31861.7	37647.6	50222.9
tr|A0A1D5XQ68|A0A1D5XQ68_WHEAT	A0A1D5XQ68	NA	Uncharacterized protein OS=Triticum aestivum PE=4 SV=1	83.02	0.00275482	2	tr|A0A1D5XQ68|A0A1D5XQ68_WHEAT	86144.6	60931.8	26742.3	18025.7	43837	0.656323	0	NA	NA	43072.3	30465.9	13371.2	9012.84
tr|A0A1D5TG03|A0A1D5TG03_WHEAT	A0A1D5TG03	NA	Uncharacterized protein OS=Triticum aestivum PE=3 SV=1	93.8	0.00174317	3	tr|A0A1D5TG03|A0A1D5TG03_WHEAT	129189	213895	91248.7	126263	127726	0.371734	0.0625	NA	NA	43063	71298.3	30416.2	42087.7
tr|A0A1D6AGA9|A0A1D6AGA9_WHEAT	A0A1D6AGA9	NA	Uncharacterized protein OS=Triticum aestivum PE=4 SV=1	186.18	0	2	tr|A0A1D6AGA9|A0A1D6AGA9_WHEAT	86069.1	133732	184773	171986	152859	0.307849	0	NA	NA	43034.5	66866.2	92386.6	85993.1
tr|A0A1D6C1I3|A0A1D6C1I3_WHEAT	A0A1D6C1I3	NA	Uncharacterized protein OS=Triticum aestivum PE=3 SV=1	132.1	0	5	tr|A0A1D6C1I3|A0A1D6C1I3_WHEAT	128978	72748.8	126804	72781.5	99792.7	0.317352	0.3	NA	NA	42982.5	24239.3	42257.7	24002.7
tr|A0A1D5TVP4|A0A1D5TVP4_WHEAT	A0A1D5TVP4	NA	Uncharacterized protein OS=Triticum aestivum PE=4 SV=1	176.35	0	4	tr|A0A1D5TVP4|A0A1D5TVP4_WHEAT	128334	160647	135580	127826	131957	0.111843	0.3125	NA	NA	42772.8	47209	45188.1	42603.5
tr|A0A1D5YML0|A0A1D5YML0_WHEAT	A0A1D5YML0	NA	Uncharacterized protein OS=Triticum aestivum PE=4 SV=1	88.49	0.00226244	2	tr|A0A1D5YML0|A0A1D5YML0_WHEAT	127939	93644.4	43582.2	91844.3	92744.4	0.388577	0.0833333	NA	NA	42646.3	31214.8	14527.4	30614.8
tr|A0A1D5RS07|A0A1D5RS07_WHEAT	A0A1D5RS07	NA	Putative rRNA methyltransferase OS=Triticum aestivum PE=3 SV=1	247.58	0	6	tr|A0A1D5RS07|A0A1D5RS07_WHEAT	153562	107195	225206	368916	189384	0.53475	0.0714286	NA	NA	42625.7	32135.3	63985.1	104942
tr|A0A1D6C6K9|A0A1D6C6K9_WHEAT	A0A1D6C6K9	NA	Uncharacterized protein OS=Triticum aestivum PE=3 SV=1	114.71	0.00190235	3	tr|A0A1D6C6K9|A0A1D6C6K9_WHEAT	127775	181787	71463.8	59463.6	99619.4	0.511227	0	NA	NA	42591.7	60595.7	23821.3	19821.2
tr|A0A1D5V970|A0A1D5V970_WHEAT	A0A1D5V970	NA	Beta-adaptin-like protein OS=Triticum aestivum PE=3 SV=1	129.7	0	1	tr|A0A1D5V970|A0A1D5V970_WHEAT	42583.4	54498.5	75870.1	167028	65184.3	0.663518	0.125	NA	NA	42583.4	54498.5	75870.1	167028
tr|A0A1D5Y0T9|A0A1D5Y0T9_WHEAT	A0A1D5Y0T9	NA	Uncharacterized protein OS=Triticum aestivum PE=4 SV=1	262.61	0	3	tr|A0A1D5Y0T9|A0A1D5Y0T9_WHEAT	128339	153359	27707	73354.4	100847	0.588458	0.125	NA	NA	42582.8	51113.1	9230.52	24446.3
tr|W5BJH2|W5BJH2_WHEAT	W5BJH2	NA	Uncharacterized protein OS=Triticum aestivum PE=4 SV=1	192.71	0	2	tr|W5BJH2|W5BJH2_WHEAT	84910.3	129408	94253.5	131499	111831	0.217408	0	NA	NA	42455.2	64704	47126.8	65749.6
tr|A0A1D5VB05|A0A1D5VB05_WHEAT	A0A1D5VB05	NA	Uncharacterized protein OS=Triticum aestivum PE=4 SV=1	85.93	0.00223964	2	tr|A0A1D5VB05|A0A1D5VB05_WHEAT	84707.8	102177	91374.6	101652	96513.5	0.089098	0	NA	NA	42353.9	51088.5	45687.3	50826.2
tr|A0A1D5TRQ6|A0A1D5TRQ6_WHEAT	A0A1D5TRQ6	NA	Uncharacterized protein OS=Triticum aestivum PE=4 SV=1	198.72	0	4	tr|A0A1D5TRQ6|A0A1D5TRQ6_WHEAT	144502	235649	130994	209834	177168	0.280133	0	NA	NA	42334.1	74786.1	43229.3	69724.5
tr|W5FU44|W5FU44_WHEAT	W5FU44	NA	Uncharacterized protein OS=Triticum aestivum PE=4 SV=1	259.47	0	7	tr|W5FU44|W5FU44_WHEAT	177075	92748.3	237942	427288	207508	0.607834	0.214286	NA	NA	42282.9	30895.5	64938.1	125272
tr|A0A1D5SW54|A0A1D5SW54_WHEAT	A0A1D5SW54	NA	ATP-dependent Clp protease proteolytic subunit OS=Triticum aestivum PE=3 SV=1	89.53	0	3	tr|A0A1D5SW54|A0A1D5SW54_WHEAT	126706	94580.5	179767	494280	153236	0.820645	0.0833333	NA	NA	42235.2	31526.8	59922.4	164760
tr|A0A1D5XTS0|A0A1D5XTS0_WHEAT	A0A1D5XTS0	NA	Uncharacterized protein OS=Triticum aestivum PE=4 SV=1	80.33	0.0027115	2	tr|A0A1D5XTS0|A0A1D5XTS0_WHEAT	84277.4	172815	189784	194952	181299	0.32195	0	NA	NA	42138.7	86407.5	94891.9	97475.9
tr|A0A1D6AD56|A0A1D6AD56_WHEAT	A0A1D6AD56	NA	Uncharacterized protein OS=Triticum aestivum PE=4 SV=1	173.85	0	2	tr|A0A1D6AD56|A0A1D6AD56_WHEAT	84134.3	18428.7	23841.8	32762.9	28302.3	0.757606	0.125	NA	NA	42067.1	9214.34	11920.9	16381.5
tr|A0A1D5UM85|A0A1D5UM85_WHEAT	A0A1D5UM85	NA	Pectin acetylesterase OS=Triticum aestivum PE=3 SV=1	276.77	0	6	tr|A0A1D5UM85|A0A1D5UM85_WHEAT	148587	200012	194149	334740	197081	0.365921	0.107143	NA	NA	42055.9	55006.9	42393	93006.5
tr|A0A1D5TP16|A0A1D5TP16_WHEAT	A0A1D5TP16	NA	Uncharacterized protein OS=Triticum aestivum PE=4 SV=1	206.67	0	4	tr|A0A1D5TP16|A0A1D5TP16_WHEAT	126303	125276	124300	138201	125790	0.0506199	0.291667	NA	NA	42033.1	38726.5	41428.1	46061.9
tr|A0A1D5W7T0|A0A1D5W7T0_WHEAT	A0A1D5W7T0	NA	Uncharacterized protein OS=Triticum aestivum PE=4 SV=1	391.97	0	8	tr|A0A1D5W7T0|A0A1D5W7T0_WHEAT	196339	159139	195224	122278	177182	0.209103	0.15	NA	NA	41873.8	31084.1	54836	34644.2
tr|A0A1D5Z480|A0A1D5Z480_WHEAT	A0A1D5Z480	NA	Uncharacterized protein OS=Triticum aestivum PE=4 SV=1	158.51	0	4	tr|A0A1D5Z480|A0A1D5Z480_WHEAT	125476	38372.6	159387	189133	142431	0.509181	0.3125	NA	NA	41820.3	12785.7	53123.8	63039.1
tr|A0A1D6DJM9|A0A1D6DJM9_WHEAT	A0A1D6DJM9	NA	Uncharacterized protein OS=Triticum aestivum PE=4 SV=1	161.89	0	5	tr|A0A1D6DJM9|A0A1D6DJM9_WHEAT	154132	74227.3	120089	114782	117436	0.28277	0.1	NA	NA	41794.9	24732.1	33158.7	33792.9
tr|A0A1D5VWU1|A0A1D5VWU1_WHEAT	A0A1D5VWU1	NA	Uncharacterized protein OS=Triticum aestivum PE=4 SV=1	71.98	0.00568475	1	tr|A0A1D5VWU1|A0A1D5VWU1_WHEAT	41553.9	34.5976	20017.3	28304.4	24160.8	0.773815	0	NA	NA	41553.9	34.5976	20017.3	28304.4
tr|W5H7S1|W5H7S1_WHEAT	W5H7S1	NA	60S ribosomal protein L13 OS=Triticum aestivum PE=3 SV=1	284.03	0	2	tr|W5H7S1|W5H7S1_WHEAT	124163	563554	296171	199710	247940	0.648261	0.0357143	NA	NA	41387.7	187851	98723.7	66569.8
tr|A0A1D5V806|A0A1D5V806_WHEAT	A0A1D5V806	NA	Uncharacterized protein OS=Triticum aestivum PE=4 SV=1	278.19	0	6	tr|A0A1D5V806|A0A1D5V806_WHEAT	154920	104600	164000	409644	159460	0.656554	0.142857	NA	NA	41229.9	34555.2	45148.2	110087
tr|A0A1D6AU23|A0A1D6AU23_WHEAT	A0A1D6AU23	NA	Uncharacterized protein OS=Triticum aestivum PE=4 SV=1	202.9	0	4	tr|A0A1D6AU23|A0A1D6AU23_WHEAT	123673	119791	46181.2	64858.8	92324.8	0.440195	0.0625	NA	NA	41219.2	36397.7	15198.6	21613.7
tr|A0A1D5TH90|A0A1D5TH90_WHEAT	A0A1D5TH90	NA	Uncharacterized protein OS=Triticum aestivum PE=3 SV=1	276.8	0	6	tr|A0A1D5TH90|A0A1D5TH90_WHEAT	123678	213596	617217	473544	343570	0.63935	0.25	NA	NA	41203.5	57334.9	205628	157833
tr|A0A1D5S045|A0A1D5S045_WHEAT	A0A1D5S045	NA	Uncharacterized protein OS=Triticum aestivum PE=4 SV=1	148.88	0	3	tr|A0A1D5S045|A0A1D5S045_WHEAT	123600	102447	80053.6	103235	102841	0.173848	0.0833333	NA	NA	41200.2	34148.9	26684.5	34411.5
tr|A0A1D5YVK0|A0A1D5YVK0_WHEAT	A0A1D5YVK0	NA	Uncharacterized protein OS=Triticum aestivum PE=3 SV=1	101.75	0.00180505	3	tr|A0A1D5YVK0|A0A1D5YVK0_WHEAT	123486	7208.86	157798	274197	140642	0.781205	0.0833333	NA	NA	41161.9	2402.95	52599.2	91398.9
tr|A0A1D5RYG2|A0A1D5RYG2_WHEAT	A0A1D5RYG2	NA	Uncharacterized protein OS=Triticum aestivum PE=4 SV=1	504.08	0	10	tr|A0A1D5RYG2|A0A1D5RYG2_WHEAT	159157	148898	511438	524042	335297	0.625497	0.204545	NA	NA	41016.8	32821.3	96816.9	105096
tr|A0A1D5TVP8|A0A1D5TVP8_WHEAT	A0A1D5TVP8	NA	Uncharacterized protein OS=Triticum aestivum PE=4 SV=1	64.72	0.00742207	1	tr|A0A1D5TVP8|A0A1D5TVP8_WHEAT	40989.4	153176	213779	246485	183477	0.552693	0	NA	NA	40989.4	153176	213779	246485
tr|A0A1D6BHF7|A0A1D6BHF7_WHEAT	A0A1D6BHF7	NA	Uncharacterized protein OS=Triticum aestivum PE=4 SV=1	138.64	0	4	tr|A0A1D6BHF7|A0A1D6BHF7_WHEAT	129576	187380	57846.7	74356.4	101966	0.522837	0	NA	NA	40964.3	60524.3	16511.1	21870.9
tr|A0A1D5SGW6|A0A1D5SGW6_WHEAT	A0A1D5SGW6	NA	Uncharacterized protein OS=Triticum aestivum PE=4 SV=1	136	0	3	tr|A0A1D5SGW6|A0A1D5SGW6_WHEAT	122671	160772	35805.9	50221.9	86446.4	0.642713	0.25	NA	NA	40890.3	53590.7	11935.3	16740.6
tr|A0A1D5WD78|A0A1D5WD78_WHEAT	A0A1D5WD78	NA	Uncharacterized protein OS=Triticum aestivum PE=4 SV=1	208.33	0	4	tr|A0A1D5WD78|A0A1D5WD78_WHEAT	123968	112074	145708	200607	134838	0.269476	0.1	NA	NA	40792.3	36955.8	48564.2	66511.2
tr|A0A077RZQ5|A0A077RZQ5_WHEAT	A0A077RZQ5	TRAES_3BF046300080CFD_c1	Uncharacterized protein OS=Triticum aestivum GN=TRAES_3BF046300080CFD_c1 PE=4 SV=1	124.44	0.000660939	3	tr|A0A077RZQ5|A0A077RZQ5_WHEAT	122344	105228	207793	97060.8	113786	0.382351	0.25	NA	NA	40781.5	35075.9	69264.3	32353.6
tr|A0A1D5V3U1|A0A1D5V3U1_WHEAT	A0A1D5V3U1	NA	Uncharacterized protein OS=Triticum aestivum PE=4 SV=1	275.19	0	5	tr|A0A1D5V3U1|A0A1D5V3U1_WHEAT	143450	265407	101451	68352.9	122451	0.595588	0.2	NA	NA	40754.3	85939.4	33806.9	22774
tr|A0A1D5TN94|A0A1D5TN94_WHEAT	A0A1D5TN94	NA	Uncharacterized protein OS=Triticum aestivum PE=4 SV=1	282.67	0	6	tr|A0A1D5TN94|A0A1D5TN94_WHEAT	166781	175696	41611.4	115299	141040	0.492965	0.25	NA	NA	40724.7	50623.9	13310.8	35750.6
tr|A0A1D6SB15|A0A1D6SB15_WHEAT	A0A1D6SB15	NA	Uncharacterized protein OS=Triticum aestivum PE=4 SV=1	63.49	0.00736016	2	tr|A0A1D6SB15|A0A1D6SB15_WHEAT	81438	79099.3	19655.9	26210.8	52655	0.643868	0.125	NA	NA	40719	39549.6	9827.97	13105.4
tr|A0A1D5X817|A0A1D5X817_WHEAT	A0A1D5X817	NA	Adenylyl cyclase-associated protein OS=Triticum aestivum PE=3 SV=1	72.15	0.00569358	1	tr|A0A1D5X817|A0A1D5X817_WHEAT	40709.6	42919.9	42.7666	2827.49	21768.6	1.08016	0	NA	NA	40709.6	42919.9	42.7666	2827.49
tr|W5EGJ5|W5EGJ5_WHEAT	W5EGJ5	NA	Uncharacterized protein OS=Triticum aestivum PE=4 SV=1	406.38	0	8	tr|W5EGJ5|W5EGJ5_WHEAT	152264	25454.2	1.28945e+06	809320	480792	1.03749	0.2	NA	NA	40578	6105.57	271059	228206
tr|A0A1D5SSX5|A0A1D5SSX5_WHEAT	A0A1D5SSX5	NA	Uncharacterized protein OS=Triticum aestivum PE=4 SV=1	137.58	0	4	tr|A0A1D5SSX5|A0A1D5SSX5_WHEAT	123591	17423.3	600173	263503	193547	1.00948	0.0625	NA	NA	40340.1	5802.63	178544	80113.1
tr|W5ARH8|W5ARH8_WHEAT	W5ARH8	NA	Uncharacterized protein OS=Triticum aestivum PE=3 SV=1	202.05	0	4	tr|W5ARH8|W5ARH8_WHEAT	123436	348528	667831	647377	497952	0.582653	0.05	NA	NA	40335.1	116171	206800	206002
tr|A0A1D5ZEM7|A0A1D5ZEM7_WHEAT	A0A1D5ZEM7	NA	Uncharacterized protein OS=Triticum aestivum PE=4 SV=1	325.02	0	6	tr|A0A1D5ZEM7|A0A1D5ZEM7_WHEAT	130664	89949.2	351745	320337	225501	0.591502	0.0416667	NA	NA	40289.8	28968.3	101785	86023.1
tr|A0A1D5VZ33|A0A1D5VZ33_WHEAT	A0A1D5VZ33	NA	ATP synthase subunit beta OS=Triticum aestivum PE=3 SV=1	211.86	0	2	tr|A0A1D5VZ33|A0A1D5VZ33_WHEAT	120774	89865.1	252185	415139	186480	0.675226	0	NA	NA	40258.1	29955	84061.8	138380
tr|A0A1D5XV20|A0A1D5XV20_WHEAT	A0A1D5XV20	NA	Proteasome subunit alpha type OS=Triticum aestivum PE=3 SV=1	421.21	0	8	tr|A0A1D5XV20|A0A1D5XV20_WHEAT	184862	428504	228118	170713	206490	0.472206	0.0555556	NA	NA	40138.5	102193	69552.3	45340.2
tr|A0A1D5RZT9|A0A1D5RZT9_WHEAT	A0A1D5RZT9	NA	Uncharacterized protein OS=Triticum aestivum PE=4 SV=1	169.16	0	3	tr|A0A1D5RZT9|A0A1D5RZT9_WHEAT	120382	170579	141911	149070	145490	0.142283	0.125	NA	NA	40127.3	56859.5	47303.6	49689.9
tr|A0A1D5VG31|A0A1D5VG31_WHEAT	A0A1D5VG31	NA	Uncharacterized protein OS=Triticum aestivum PE=4 SV=1	153.16	0	4	tr|A0A1D5VG31|A0A1D5VG31_WHEAT	126776	90591	231294	235576	179035	0.429942	0.15	NA	NA	40050.9	30191.9	77092.9	78520.2
tr|A0A1D5VCC6|A0A1D5VCC6_WHEAT	A0A1D5VCC6	NA	Uncharacterized protein OS=Triticum aestivum PE=4 SV=1	179.3	0	1	tr|A0A1D5VCC6|A0A1D5VCC6_WHEAT	39996.8	110216	93500.4	73202.8	83351.6	0.381398	0.25	NA	NA	39996.8	110216	93500.4	73202.8
tr|A0A1D5WBI8|A0A1D5WBI8_WHEAT	A0A1D5WBI8	NA	DNA polymerase OS=Triticum aestivum PE=3 SV=1	121.38	0.000652742	4	tr|A0A1D5WBI8|A0A1D5WBI8_WHEAT	122691	165235	37076.4	37446.9	80069	0.706369	0.1875	NA	NA	39947.8	54885.5	12353.7	12477.2
tr|A0A1D6AYK8|A0A1D6AYK8_WHEAT	A0A1D6AYK8	NA	Uncharacterized protein OS=Triticum aestivum PE=4 SV=1	62.7	0.0073278	2	tr|A0A1D6AYK8|A0A1D6AYK8_WHEAT	79568.3	22936.4	18007.5	24618	23777.2	0.799094	0	NA	NA	39784.1	11468.2	9003.76	12309
tr|A0A1D5SQ32|A0A1D5SQ32_WHEAT	A0A1D5SQ32	NA	Uncharacterized protein OS=Triticum aestivum PE=4 SV=1	184.71	0	5	tr|A0A1D5SQ32|A0A1D5SQ32_WHEAT	121317	12880.7	195498	192222	156769	0.655608	0.2	NA	NA	39743.3	4283.29	64344	59842.8
tr|A0A1D5ZAL1|A0A1D5ZAL1_WHEAT	A0A1D5ZAL1	NA	Uncharacterized protein OS=Triticum aestivum PE=4 SV=1	254.58	0	6	tr|A0A1D5ZAL1|A0A1D5ZAL1_WHEAT	151683	225109	443071	302605	263857	0.444042	0.0357143	NA	NA	39683.8	64949.8	128055	75297
tr|A0A1D6AIF0|A0A1D6AIF0_WHEAT	A0A1D6AIF0	NA	Citrate synthase OS=Triticum aestivum PE=3 SV=1	305.29	0	4	tr|A0A1D6AIF0|A0A1D6AIF0_WHEAT	128521	190199	57745	130192	129356	0.427648	0.2	NA	NA	39616.4	61097.2	18381.1	40473.3
tr|A0A1D5V4F3|A0A1D5V4F3_WHEAT	A0A1D5V4F3	NA	Uncharacterized protein OS=Triticum aestivum PE=4 SV=1	60.57	0.00765917	1	tr|A0A1D5V4F3|A0A1D5V4F3_WHEAT	39571.6	55237.1	16763	31236.9	35404.2	0.450253	0	NA	NA	39571.6	55237.1	16763	31236.9
tr|A0A1D6CXT4|A0A1D6CXT4_WHEAT	A0A1D6CXT4	NA	Proteasome subunit alpha type OS=Triticum aestivum PE=3 SV=1	87.08	0	2	tr|A0A1D6CXT4|A0A1D6CXT4_WHEAT	79060.5	2824.58	63900.9	82136.4	71480.7	0.648877	0.25	NA	NA	39530.2	1412.29	31950.4	41068.2
tr|A0A1D6BP32|A0A1D6BP32_WHEAT	A0A1D6BP32	NA	Mg-protoporphyrin IX chelatase OS=Triticum aestivum PE=3 SV=1	195.6	0	5	tr|A0A1D6BP32|A0A1D6BP32_WHEAT	131764	40966.1	141780	235223	136772	0.577838	0.0833333	NA	NA	39502.2	13107.2	40109.7	69379.1
tr|A0A1D5YXN0|A0A1D5YXN0_WHEAT	A0A1D5YXN0	NA	Uncharacterized protein OS=Triticum aestivum PE=4 SV=1	110.36	0.00187149	2	tr|A0A1D5YXN0|A0A1D5YXN0_WHEAT	78946.8	82949.3	13191.5	7074.66	46069.1	0.900161	0	NA	NA	39473.4	41474.6	6595.73	3537.33
tr|A0A1D6B9X5|A0A1D6B9X5_WHEAT	A0A1D6B9X5	NA	Uncharacterized protein OS=Triticum aestivum PE=4 SV=1	147.7	0	4	tr|A0A1D6B9X5|A0A1D6B9X5_WHEAT	136082	131548	74191.2	97578.2	114563	0.267017	0.0625	NA	NA	39427	38466.6	24725.3	29982.7
tr|A0A1D5YDH0|A0A1D5YDH0_WHEAT	A0A1D5YDH0	NA	Uncharacterized protein OS=Triticum aestivum PE=4 SV=1	288.28	0	9	tr|A0A1D5YDH0|A0A1D5YDH0_WHEAT	218057	411657	316751	410848	363799	0.272035	0.0454545	NA	NA	39266.7	80378.9	89174.3	110495
tr|A0A1D5VIQ8|A0A1D5VIQ8_WHEAT	A0A1D5VIQ8	NA	Uncharacterized protein OS=Triticum aestivum PE=4 SV=1	58.17	0.00848256	1	tr|A0A1D5VIQ8|A0A1D5VIQ8_WHEAT	39171.3	51474	465.381	15.42	19818.3	1.16362	0.25	NA	NA	39171.3	51474	465.381	15.42
tr|A0A1D5Y9X9|A0A1D5Y9X9_WHEAT	A0A1D5Y9X9	NA	Pyruvate kinase OS=Triticum aestivum PE=3 SV=1	114.02	0	2	tr|A0A1D5Y9X9|A0A1D5Y9X9_WHEAT	78233.1	114401	147385	263104	130893	0.530775	0	NA	NA	39116.6	57200.5	73692.4	131552
tr|A0A1D6B1S4|A0A1D6B1S4_WHEAT	A0A1D6B1S4	NA	Uncharacterized protein OS=Triticum aestivum PE=4 SV=1	146.4	0	3	tr|A0A1D6B1S4|A0A1D6B1S4_WHEAT	117303	114232	36355.5	81395.7	97814	0.431325	0	NA	NA	39101	38077.4	12118.5	27131.9
tr|A0A1D5UIM2|A0A1D5UIM2_WHEAT	A0A1D5UIM2	NA	Sulfotransferase OS=Triticum aestivum PE=3 SV=1	91.96	0.00172513	1	tr|A0A1D5UIM2|A0A1D5UIM2_WHEAT	39069.8	35232	33387.8	49931.4	37150.9	0.18794	0.25	NA	NA	39069.8	35232	33387.8	49931.4
tr|A0A1D5VD29|A0A1D5VD29_WHEAT	A0A1D5VD29	NA	Uncharacterized protein OS=Triticum aestivum PE=4 SV=1	124.22	0.000658762	2	tr|A0A1D5VD29|A0A1D5VD29_WHEAT	78093.7	73782.7	72851.3	100702	75938.2	0.160979	0.166667	NA	NA	39046.9	36891.3	36425.7	50350.8
[truncated: 722 more rows]
